# Supplementary material for: KAT2-mediated acetylation switches the mode of PALB2 chromatin association to safeguard genome integrity
Source: PubMed Central journal article supplement (PMC9671498; doi:10.7554/elife.57736), 2022-10-21

# Figure 1-figure supplement 1 - source data 2

## Figure 1 - figure supplement 1B

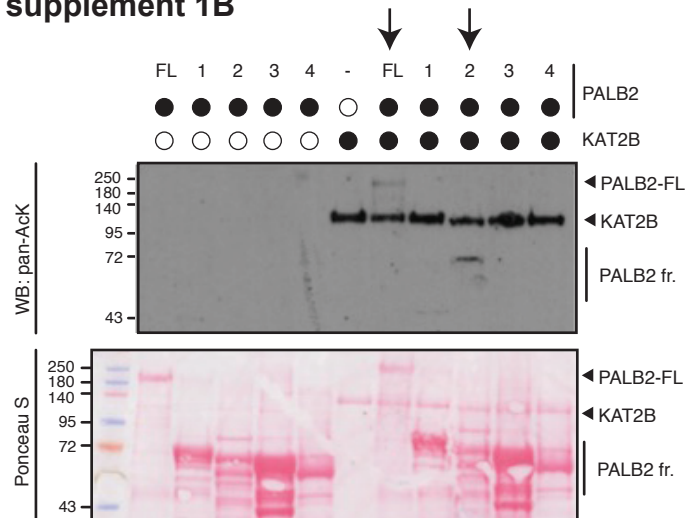

source data

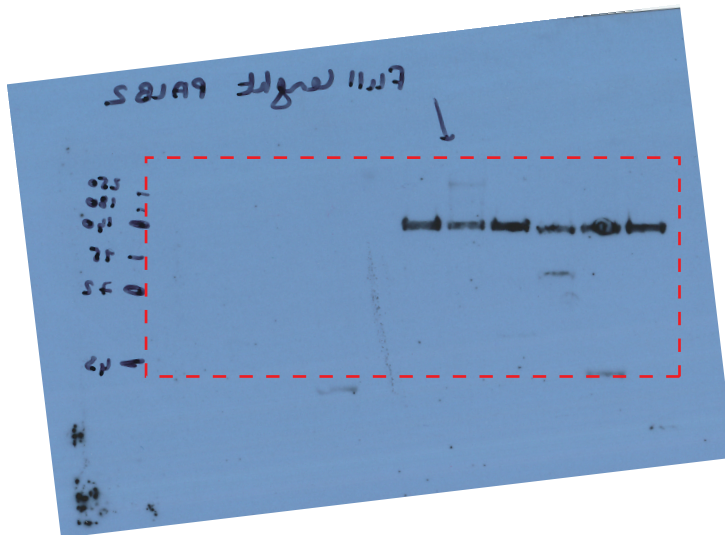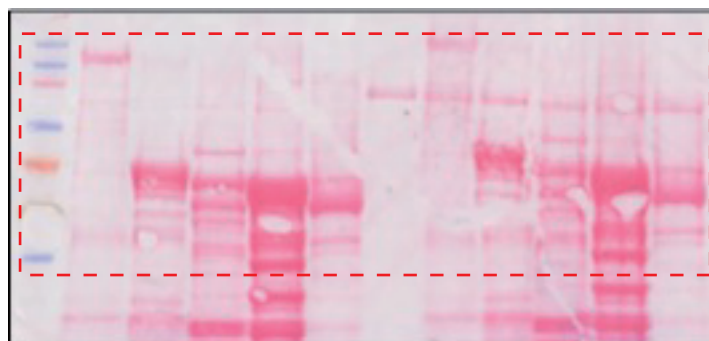

Supplement: elife-57736-fig1-figsupp1-data2.pdf [file elife-57736-fig1-figsupp1-data2.pdf]
