# Supplementary material for: KAT2-mediated acetylation switches the mode of PALB2 chromatin association to safeguard genome integrity
Source: PubMed Central journal article supplement (PMC9671498; doi:10.7554/elife.57736), 2022-10-21

Figure 2C

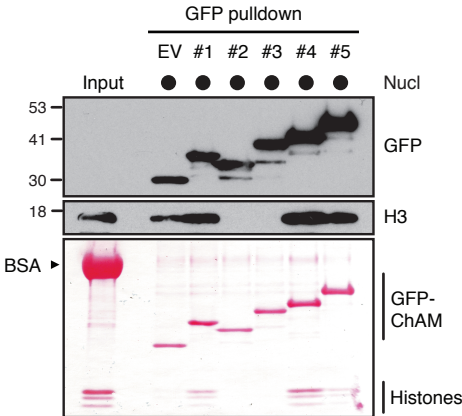

source data

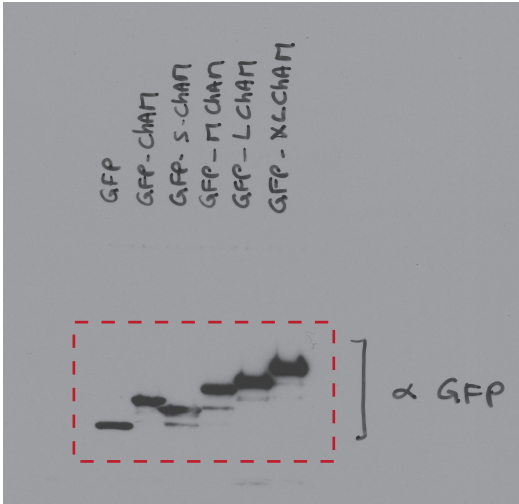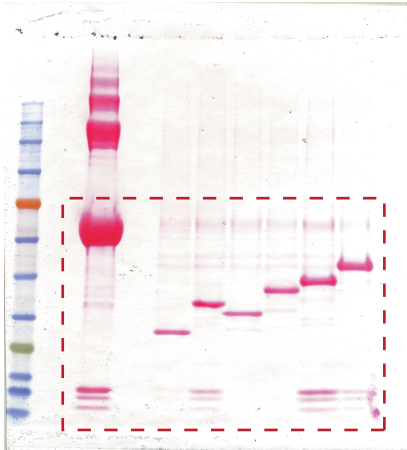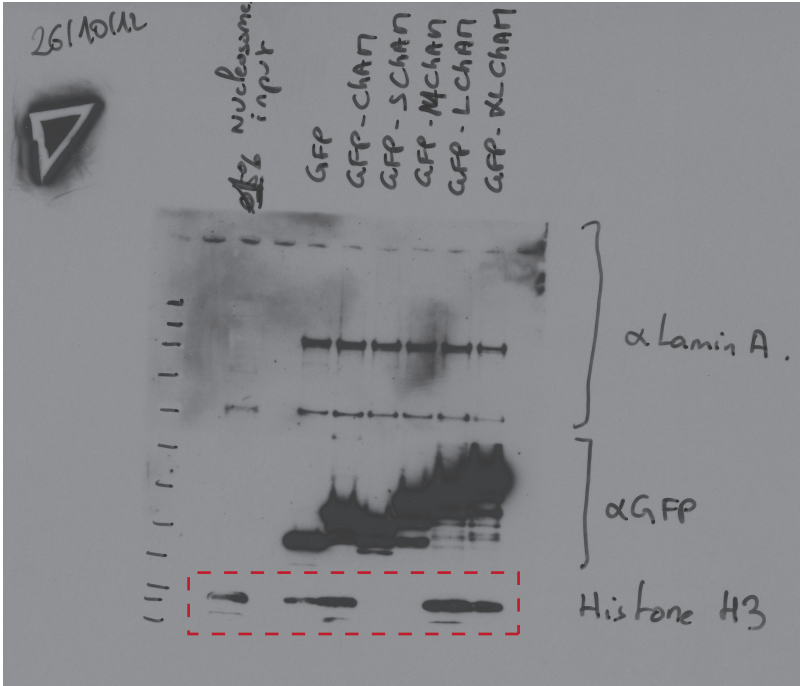

Supplement: elife-57736-fig2-data2.pdf [file elife-57736-fig2-data2.pdf]
