# Supplementary material for: KAT2-mediated acetylation switches the mode of PALB2 chromatin association to safeguard genome integrity
Source: eLife journal article supplement (doi:10.7554/elife.57736), 2022-10-21

Figure 4B

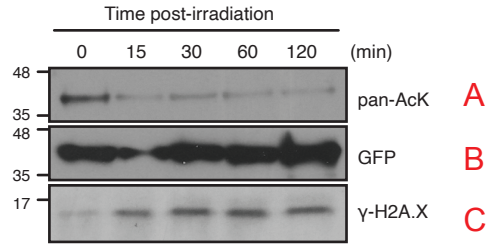

source data

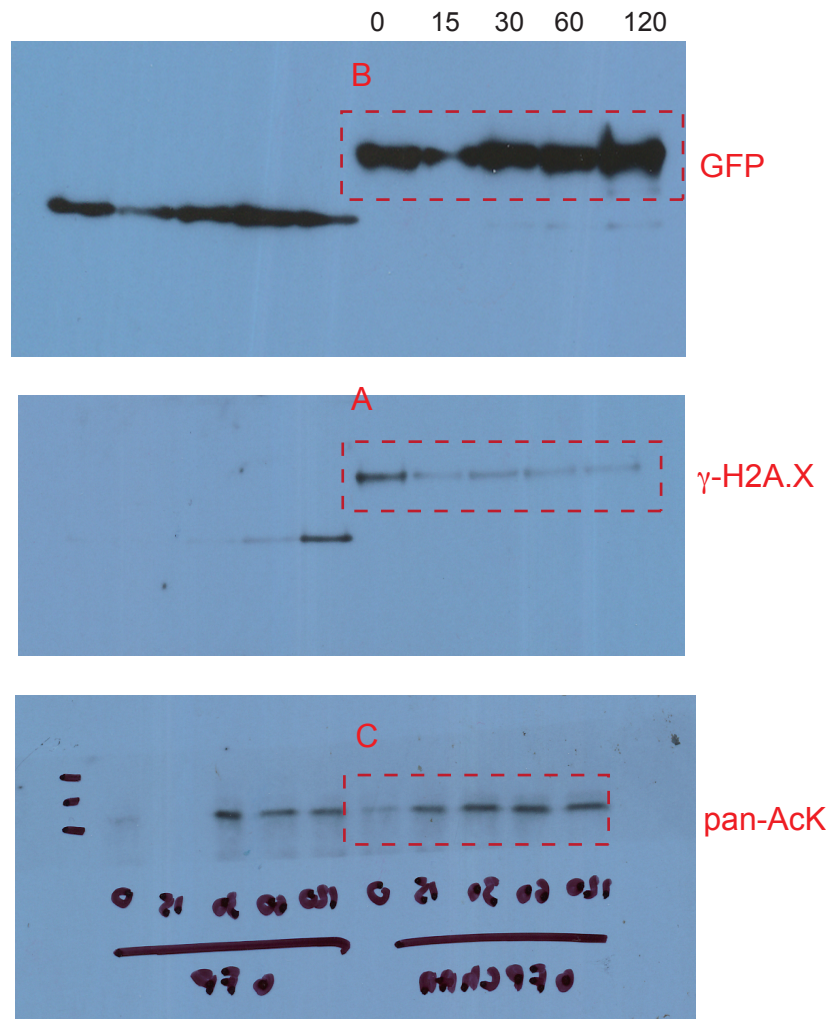

Supplement: fig4-data1 [file elife-57736-fig4-data1-v2.pdf]
