# Supplementary material for: KAT2-mediated acetylation switches the mode of PALB2 chromatin association to safeguard genome integrity
Source: eLife. 2022 Oct 21;11:e57736. doi: 10.7554/eLife.57736 (PMC9671498; doi:10.7554/eLife.57736)
Supplement: Figure 3—figure supplement 1—source data 2. [file elife-57736-fig3-figsupp1-data2.xlsx]

## Sheet: S3C
	siSCR			siKAT2
0	1	0	36	1	0	25
0.93	1.00178	0.024949	36	0.994905	0.03042	25
1.86	0	0	36	0	0	25
2.79	0.276873	0.049352	36	0.353762	0.073137	25
3.72	0.422391	0.060899	36	0.511939	0.088259	25
4.65	0.518456	0.065039	36	0.610096	0.089695	25
5.58	0.588786	0.070855	36	0.676038	0.088944	25
6.51	0.640122	0.070221	36	0.723759	0.09003	25
7.44	0.682915	0.068405	36	0.76159	0.08419	25
8.37	0.714429	0.063835	36	0.792113	0.081379	25
9.3	0.745183	0.064569	36	0.816653	0.077042	25
10.23	0.76589	0.062133	36	0.833083	0.07397	25
11.16	0.787637	0.064911	36	0.843931	0.072196	25
12.09	0.805806	0.060212	36	0.852929	0.063565	25
13.02	0.826111	0.060714	36	0.86812	0.063223	25
13.95	0.832752	0.057552	36	0.877834	0.061017	25
14.88	0.849382	0.058197	36	0.888056	0.058843	25
15.81	0.862992	0.054224	36	0.896541	0.059321	25
16.74	0.870446	0.050369	36	0.894141	0.05475	25
17.67	0.877245	0.051023	36	0.907844	0.060545	25
18.6	0.886993	0.049784	36	0.913229	0.055125	25
19.53	0.891077	0.050183	36	0.917627	0.054653	25
20.46	0.896459	0.050953	36	0.915438	0.055931	25
21.39	0.901356	0.049819	36	0.929747	0.053631	25
22.32	0.908189	0.052756	36	0.92416	0.054871	25
23.25	0.913185	0.050971	36	0.92967	0.049953	25
24.18	0.9176	0.052019	36	0.931559	0.054473	25
25.11	0.919868	0.052215	36	0.933082	0.052026	25
26.04	0.925713	0.055964	36	0.940144	0.05216	25
26.97	0.928731	0.050763	36	0.939178	0.054613	25
27.9	0.926697	0.048009	36	0.941489	0.049771	25
28.83	0.928634	0.05021	36	0.941562	0.058746	25
29.76	0.937525	0.05315	36	0.942867	0.053153	25
30.69	0.938426	0.048438	36	0.9524	0.053705	25
31.62	0.942545	0.044181	36	0.953496	0.049143	25
32.55	0.945191	0.045381	36	0.954055	0.053432	25
33.48	0.951814	0.046357	36	0.955048	0.049195	25
34.41	0.949012	0.046848	36	0.96294	0.053349	25
35.34	0.954018	0.047285	36	0.957057	0.045636	25
36.27	0.952575	0.051534	36	0.952238	0.050699	25
37.2	0.955526	0.050869	36	0.963545	0.048785	25
38.13	0.954518	0.05067	36	0.960228	0.053731	25
39.06	0.955126	0.048444	36	0.969046	0.053957	25

## Sheet: S3E
	Untreated			KDAC inh
0	1	0	29	1	0	45
0.93	1.0019	0.028584	29	1.00226	0.020795	45
1.86	0	0	29	0	0	45
2.79	0.206199	0.039844	29	0.16161	0.04912	45
3.72	0.331722	0.054811	29	0.266448	0.070743	45
4.65	0.418561	0.060066	29	0.34266	0.081826	45
5.58	0.488908	0.064098	29	0.403207	0.091257	45
6.51	0.546517	0.069343	29	0.455356	0.095259	45
7.44	0.592225	0.072567	29	0.500006	0.10222	45
8.37	0.631347	0.070313	29	0.537115	0.101889	45
9.3	0.666144	0.066883	29	0.568683	0.096251	45
10.23	0.69365	0.067185	29	0.595967	0.101642	45
11.16	0.720599	0.064613	29	0.617488	0.098957	45
12.09	0.735092	0.070232	29	0.6434	0.1005	45
13.02	0.751852	0.062527	29	0.663532	0.098544	45
13.95	0.773273	0.062598	29	0.678225	0.091774	45
14.88	0.785254	0.05827	29	0.695426	0.096675	45
15.81	0.798187	0.061896	29	0.711073	0.098673	45
16.74	0.808508	0.04846	29	0.721262	0.094327	45
17.67	0.819532	0.053473	29	0.733227	0.092413	45
18.6	0.83245	0.051866	29	0.750762	0.092682	45
19.53	0.841722	0.051507	29	0.761986	0.090915	45
20.46	0.844242	0.046623	29	0.768996	0.086557	45
21.39	0.849816	0.049761	29	0.778307	0.084186	45
22.32	0.848126	0.049306	29	0.785921	0.081891	45
23.25	0.862634	0.049819	29	0.794122	0.079782	45
24.18	0.870693	0.044976	29	0.799236	0.080412	45
25.11	0.876188	0.044541	29	0.80844	0.08033	45
26.04	0.878727	0.042185	29	0.817303	0.079704	45
26.97	0.887005	0.051614	29	0.8228	0.076609	45
27.9	0.889001	0.041976	29	0.826911	0.076239	45
28.83	0.895602	0.041333	29	0.83272	0.074627	45
29.76	0.896863	0.04563	29	0.832625	0.074254	45
30.69	0.903069	0.044852	29	0.842358	0.073997	45
31.62	0.906586	0.040035	29	0.846203	0.073243	45
32.55	0.905345	0.050525	29	0.845189	0.072762	45
33.48	0.912777	0.04341	29	0.85071	0.0761	45
34.41	0.914656	0.039628	29	0.851316	0.07811	45
35.34	0.919188	0.040928	29	0.854178	0.075555	45
36.27	0.916917	0.045364	29	0.86002	0.072023	45
37.2	0.919662	0.03995	29	0.86198	0.071088	45
38.13	0.922513	0.040356	29	0.868666	0.06695	45
39.06	0.926207	0.044805	29	0.8734	0.07751	45
