# Supplementary material for: KAT2-mediated acetylation switches the mode of PALB2 chromatin association to safeguard genome integrity
Source: eLife. 2022 Oct 21;11:e57736. doi: 10.7554/eLife.57736 (PMC9671498; doi:10.7554/eLife.57736)
Supplement: Figure 3—source data 2. [file elife-57736-fig3-data2.xlsx]

## Sheet: 3D
siSCR	siKAT2A/B
2.7	3.72
2.99	2.41
2.66	2.09
4.11	1.65
3.68	1.82
3.69	1.77
4.07	1.84
2.97	1
4.06	1.51
1.76	1.26
1.79	1.53
2.81	2.38
2.21	2.45
2.67	3.15
2.24	2.94
2.95	2.53
3.12	1.79
2.83	2.25
3.28	1.77
2.77	1.85
3.31	1.78
3.63	1.79
1.98	1.55
2.55	2.35
2.34	2.5
2.69
2.43
2.94
2.78
3.07
3.3
2.87
2.32
2.69
2.71
2.57
2.01

## Sheet: 3F
Untreated	KDAC inh
2.28	8.61
2.98	7.58
3.47	4.97
3.12	6.19
2.5	8.13
3.69	6.41
4.4	5.34
3.34	6.64
3.83	7.02
3.06	3.67
3.38	3.8
3.59	3.27
4.04	1.93
4.39	3.3
3.41	6.28
3.11	5.38
4.03	4.98
4.5	5.5
7.14	3.9
3.47	4.12
2.88	4.29
4.2	3.48
3.77	4.1
3.63	3.14
3.79	2.99
2.83	3.96
4.13	4.24
4.99	6.74
4.47	5.12
	4.84
	5.23
	4.44
	4.8
	4.53
	5
	4.02
	3.97
	4.12
	4.31
	5.11
	5.04
	4.53
	4
	4.15
	4.47
