# Supplementary material for: KAT2-mediated acetylation switches the mode of PALB2 chromatin association to safeguard genome integrity
Source: eLife. 2022 Oct 21;11:e57736. doi: 10.7554/eLife.57736 (PMC9671498; doi:10.7554/eLife.57736)
Supplement: Figure 4—figure supplement 1—source data 1. [file elife-57736-fig4-figsupp1-data1.xlsx]

## Sheet: S4C
	Undamaged			IR 4Gy
0	1	0	20	1	0	19
0.93	1.00389	0.015217	20	1.00138	0.025887	19
1.86	0	0	20	0	0	19
2.79	0.138164	0.033926	20	0.188132	0.04042	19
3.72	0.22703	0.053619	20	0.302602	0.051881	19
4.65	0.295327	0.062692	20	0.378789	0.056583	19
5.58	0.350484	0.071625	20	0.445654	0.062475	19
6.51	0.395931	0.074652	20	0.496194	0.057223	19
7.44	0.433582	0.077373	20	0.533171	0.04831	19
8.37	0.468477	0.080508	20	0.567206	0.062195	19
9.3	0.499392	0.08141	20	0.595461	0.058502	19
10.23	0.525961	0.082445	20	0.620068	0.059685	19
11.16	0.552043	0.085608	20	0.644207	0.054806	19
12.09	0.571895	0.083253	20	0.668482	0.060061	19
13.02	0.59011	0.087986	20	0.680088	0.05627	19
13.95	0.612076	0.085101	20	0.69526	0.056906	19
14.88	0.626039	0.08708	20	0.709907	0.053088	19
15.81	0.63886	0.086376	20	0.724742	0.054671	19
16.74	0.652858	0.08563	20	0.744513	0.057816	19
17.67	0.666089	0.085833	20	0.748631	0.051084	19
18.6	0.680692	0.08594	20	0.75861	0.055353	19
19.53	0.692125	0.086951	20	0.774067	0.056416	19
20.46	0.702354	0.084652	20	0.786292	0.057081	19
21.39	0.715116	0.083937	20	0.792327	0.059354	19
22.32	0.717528	0.081849	20	0.794116	0.055782	19
23.25	0.726054	0.082589	20	0.790194	0.050123	19
24.18	0.733959	0.081828	20	0.809318	0.056142	19
25.11	0.738312	0.08044	20	0.824513	0.059761	19
26.04	0.750826	0.079473	20	0.829716	0.056283	19
26.97	0.752253	0.075681	20	0.825719	0.046252	19
27.9	0.760133	0.075827	20	0.833026	0.050903	19
28.83	0.773983	0.077692	20	0.839753	0.055413	19
29.76	0.771297	0.076709	20	0.842395	0.058656	19
30.69	0.782565	0.074904	20	0.850405	0.065216	19
31.62	0.7863	0.073458	20	0.849087	0.056388	19
32.55	0.795297	0.075077	20	0.855816	0.05964	19
33.48	0.79546	0.074077	20	0.861679	0.059212	19
34.41	0.80208	0.076503	20	0.864116	0.065051	19
35.34	0.799723	0.072554	20	0.858608	0.0598	19
36.27	0.8023	0.075817	20	0.867192	0.054818	19
37.2	0.807217	0.065484	20	0.865315	0.050745	19
38.13	0.811599	0.071422	20	0.869454	0.04546	19
39.06	0.815367	0.068134	20	0.875814	0.042676	19
