# Supplementary material for: KAT2-mediated acetylation switches the mode of PALB2 chromatin association to safeguard genome integrity
Source: eLife. 2022 Oct 21;11:e57736. doi: 10.7554/eLife.57736 (PMC9671498; doi:10.7554/eLife.57736)
Supplement: Figure 4—source data 2. [file elife-57736-fig4-data2.xlsx]

## Sheet: 4C
	average	stdev
0	100	0
15	34.1087	9.20696
30	33.424	20.3048
60	12.2595	1.58902
120	9.10573

## Sheet: 4E
Undamaged	IR 4Gy
5.1891	3.7122
5.3695	4.668
6.4	5.5819
4.4551	4.7934
5.5444	4.4893
7.938	4.5303
8.3546	5.3428
6.0494	4.1446
6.4932	4.0953
4.3686	4.7601
6.0464	3.948
6.6981	5.9749
6.0156	3.924
5.0937	3.842
3.1	5.1649
5.1587	5.1649
4.2534	3.0489
4.3548	4.1007
5.1714	2.4628
4.6532	3.1907
	3.9443
	3.9726
