# Supplementary material for: KAT2-mediated acetylation switches the mode of PALB2 chromatin association to safeguard genome integrity
Source: eLife. 2022 Oct 21;11:e57736. doi: 10.7554/eLife.57736 (PMC9671498; doi:10.7554/eLife.57736)
Supplement: Figure 5—figure supplement 1—source data 1. [file elife-57736-fig5-figsupp1-data1.xlsx]

## Sheet: S5C
WT	deltaChAM
3.51	1.04
2.98	1.45
3.68	1.15
4.11	1.55
2.31	0.88
5.45	1.53
4.6	1.52
4.07	1.3
3.6	1.13
3.72	1.2
2.2	0.68
3.65	1.21
2.45	1.36
3.12	1.12
2.49	1.41
2.84	1.46
3.41	1.28
3.26

## Sheet: S5D
WT			deltaChAM
1	0	18	1	0	17
1.00359	0.02934	18	1.00583	0.035038	17
0	0	18	0	0	17
0.220203	0.0433	18	0.492886	0.065459	17
0.354246	0.04935	18	0.653662	0.070565	17
0.455136	0.067482	18	0.740182	0.075396	17
0.526372	0.064388	18	0.795451	0.070537	17
0.573763	0.068339	18	0.830304	0.068696	17
0.617311	0.073115	18	0.84485	0.070128	17
0.658922	0.067193	18	0.857854	0.061942	17
0.686098	0.073762	18	0.884393	0.06639	17
0.708514	0.071375	18	0.901221	0.05947	17
0.734835	0.07417	18	0.916916	0.062563	17
0.760717	0.068067	18	0.916304	0.059515	17
0.780944	0.070494	18	0.928889	0.063712	17
0.791431	0.064433	18	0.932636	0.049026	17
0.804975	0.067146	18	0.939561	0.056205	17
0.808797	0.062254	18	0.957097	0.04928	17
0.821658	0.062509	18	0.94894	0.042403	17
0.837884	0.065863	18	0.955889	0.040072	17
0.848997	0.060375	18	0.94845	0.044407	17
0.846442	0.05202	18	0.948521	0.063831	17
0.856211	0.059738	18	0.951214	0.060001	17
0.85757	0.044957	18	0.950294	0.04487	17
0.865129	0.051228	18	0.961393	0.055662	17
0.872584	0.045473	18	0.955306	0.047175	17
0.870333	0.049214	18	0.953674	0.04922	17
0.880164	0.048021	18	0.968757	0.044531	17
0.881803	0.040762	18	0.955498	0.037861	17
0.889978	0.05091	18	0.97329	0.044598	17
0.891395	0.047034	18	0.959133	0.038886	17
0.901555	0.049262	18	0.965273	0.04189	17
0.900128	0.046244	18	0.959788	0.047263	17
0.90486	0.045676	18	0.973676	0.046042	17
0.902626	0.04519	18	0.982399	0.052681	17
0.907629	0.040584	18	0.97766	0.040152	17
0.919999	0.042253	18	0.964606	0.0461	17
0.927501	0.042572	18	0.972986	0.051775	17
0.926217	0.037852	18	0.987338	0.058029	17
0.925496	0.039416	18	0.972244	0.047242	17
0.930266	0.04023	18	0.978113	0.052016	17
0.921023	0.03411	18	0.979723	0.050034	17
0.93775	0.039944	18	0.990082	0.051942	17
