# Supplementary material for: KAT2-mediated acetylation switches the mode of PALB2 chromatin association to safeguard genome integrity
Source: eLife. 2022 Oct 21;11:e57736. doi: 10.7554/eLife.57736 (PMC9671498; doi:10.7554/eLife.57736)
Supplement: Figure 5—source data 3. [file elife-57736-fig5-data3.xlsx]

## Sheet: 5C
	WT	7R	7Q
repl_1	1	0.642686	0.486098
repl_2	1	1.06749	0.462962
repl_3	1	0.714872	0.45547

## Sheet: 5E
WT	7R	7Q
5.5	4.55	3.68
4.54	4.72	2.77
3.52	3.64	3.74
4.19	3.53	2.59
4.8	6.92	3.24
4.32	5.47	4.66
3.76	5.61	2.73
5.17	3.85	2.36
4.44	4.5	3.69
4.28	3.05	2.78
5.26	5.68	2.88
5.76	7.15	3.8
6.96	3.38	2.55
4.42	5.2	3.84
7.41	4.59	3.29
3.63	5.95	2.15
3.47	5.99	2.34
3.28	5.26	2.23
3.7	2.58	1.81
3.5	3.88	0.72
3.82	2.16	0.91
3.09	4.17	1.35
4.48	3.62	1.99
4.26	3.58	2.1
3.2	3.35	2.37
3.83	2.68	2.39
3.28	3.52
2.87	4.17
3.18	3.46
3.69	3.49
3.09	4.01
2.33
2.85
