# Supplementary material for: KAT2-mediated acetylation switches the mode of PALB2 chromatin association to safeguard genome integrity
Source: eLife. 2022 Oct 21;11:e57736. doi: 10.7554/eLife.57736 (PMC9671498; doi:10.7554/eLife.57736)
Supplement: Figure 6—source data 2. [file elife-57736-fig6-data2.xlsx]

## Sheet: WT
REORGANIZED DATA FROM 3 FIELDS	CELL FRAP	CONTROL	CELL FRAP	CONTROL	CELL FRAP	CONTROL	CELL FRAP	CONTROL	CELL FRAP	CONTROL	CELL FRAP	CONTROL	CELL FRAP	CONTROL	CELL FRAP	CONTROL	CELL FRAP	CONTROL	CELL FRAP	CONTROL	CELL FRAP	CONTROL	CELL FRAP	CONTROL	CELL FRAP	CONTROL	CELL FRAP	CONTROL	CELL FRAP	CONTROL	CELL FRAP	CONTROL	CELL FRAP	CONTROL	CELL FRAP	CONTROL	CELL FRAP	CONTROL	CELL FRAP	CONTROL	CELL FRAP	CONTROL	CELL FRAP	CONTROL	CELL FRAP	CONTROL	CELL FRAP	CONTROL	CELL FRAP
Axis [s] - TIME	ROI1 []	ROI14 []	ROI2 []	ROI15 []	ROI3 []	ROI16 []	ROI4 []	ROI17 []	ROI5 []	ROI18 []	ROI6 []	ROI19 []	ROI7 []	ROI20 []	ROI8 []	ROI21 []	ROI9 []	ROI22 []	ROI10 []	ROI23 []	ROI11 []	ROI24 []	ROI12 []	ROI25 []	ROI13 []	ROI26 []	ROI1 []	ROI10 []	ROI2 []	ROI11 []	ROI3 []	ROI12 []	ROI4 []	ROI13 []	ROI5 []	ROI14 []	ROI6 []	ROI15 []	ROI7 []	ROI16 []	ROI8 []	ROI17 []	ROI9 []	ROI18 []	ROI1 []	ROI11 []	ROI2 []	ROI12 []	ROI3 []
0	163.538	177	89.8462	99.5385	90.6154	81.5385	111.615	112.692	90.2308	85.9231	219.846	233.769	240.462	234	101	99.3077	300	300.692	241.923	224.923	213.154	232.154	284.077	288.769	105.692	110.923	101.1	124.5	114.8	137.3	170.4	158.9	117.6	118.1	497.4	462.5	443.3	486.7	893.3	895.9	281.6	280.7	773.5	764.8	189.5	176.125	301.375	343.875	301.5
5.17	152.769	138.923	83.2308	78.3077	73.3077	87.4615	96.7692	99.5385	93.6923	96.4615	252.692	202.615	244.769	252.462	78.7692	75.9231	324.077	325.615	213.308	223.923	249.615	233.385	257.308	249.769	127.462	108.846	119.7	110.6	118.7	98.2	138.6	156	124.4	121.8	450.9	496.8	529	495.8	882.1	890.6	309.5	327.9	787.8	795.4	174.375	201.875	313.75	278.875	324.25
13.89	94.6923	154.462	71.9231	64.2308	52	75.1538	72.3077	130.231	54.9231	81.9231	151.154	202	171.385	243.538	67.1538	78.7692	175.923	273.154	146.231	225.846	222.923	232.923	186.308	261.923	107.923	109.538	68.7	100.8	78.8	89.6	122.8	149.6	75.7	127	353.6	497.7	310.9	481.2	584	752.5	248.2	332.1	560.9	749.6	112.875	188.125	234.5	265.75	185.125
19.12	109.923	150	70.0769	90.1538	63	74.9231	93.0769	94	41.4615	85.3077	154.154	196.077	173.154	238.846	79.6923	89.9231	210.154	249.154	131.692	245.462	202.231	219.615	185.923	249.308	102.538	131.923	83.9	81.9	72.7	97.2	162.2	163.6	100.9	130.2	327.6	465.3	393.6	498.5	598.4	798	221.7	309.8	650.6	666.7	176	158.5	240.5	271.625	271
49.12	160.462	115.077	89.1538	70.6154	78.2308	95.8462	78.2308	97.2308	66.3077	69.0769	187.462	193.385	222.615	231	81.0769	87.3077	284.769	295.538	163.077	213.077	252.308	253.692	237.462	270.385	121.231	131.154	93.9	86.8	103.9	95.9	153.8	160.4	107.3	136.1	411.1	455.5	400.6	512.6	767	790.7	236.5	266.5	842.1	696.6	175.375	173	271.375	319.125	290.125
79.12	122.462	153.538	99.1538	86.7692	66	99.6923	91.7692	101.308	81.4615	59.3846	176.231	211.615	204.692	212.462	83.1538	83	281.308	259.923	171.769	196.692	247.923	284.846	294.923	218.462	115.538	114.231	96.8	75.7	84.3	103	129.7	155.5	120.8	108.2	365.3	457.1	475.3	586.5	701.3	799.1	230.4	241	731.1	667.5	130.5	130	362.25	260.375	280.25
109.13	138.154	126.231	96.3846	91.4615	110.462	76.6923	102.615	86.6154	63.6154	58.1538	181.538	200.846	253.769	252.615	89.0769	77.1538	309.923	255.923	140.462	175.462	273.385	259.769	275.385	243.538	109.923	119.077	109.3	74.5	104.5	120	159.9	150.1	134.4	111.9	458.8	487.6	417.7	501.9	740	674.5	226.5	222.8	644.3	714.7	135.875	143.5	323.5	339.5	292.125
139.13	123.077	139.462	102.385	84.6154	73.4615	66.1538	103	81.2308	78.6923	78.6154	206.308	240.923	241.231	236.154	96.6923	87	309.538	270.692	170.462	211.231	305.154	209.615	293.923	202.154	103.692	126.538	103.2	55.3	92.2	107.1	152.7	151.8	124.5	135.1	474.8	477.4	392	462.1	761.2	697.7	220.1	259.4	708.8	701.8	147	133.625	315.5	270.25	274.875
169.13	99	144.692	96.4615	86.3846	99.4615	45.7692	96.7692	90.6923	92.2308	94.4615	194.846	218.846	214.692	250	92.7692	72.4615	284	272.769	187.615	243	256.923	207.692	303.462	248.923	124.615	113.154	100.2	68.3	102	107.3	134.5	143.6	116.9	120	532.5	446.4	407.4	506.4	753	738	282.9	295.2	767.8	713.4	194	146.5	352.25	288.375	247.125
199.13	102.462	140	74.4615	91.0769	108.615	75.6154	125.462	84.4615	79.9231	93.3846	194.923	205.462	252.231	233	86.6154	94.6154	278.538	261.077	211.308	223.923	278.769	262.769	306	244.462	117.462	96.9231	141.3	72.3	78.1	85.1	135.3	165	120.8	132.1	553.2	476.6	471.2	498.6	771.7	713.1	336.1	265.2	814.8	657.7	188.875	144.75	350	252.5	306.25
229.13	113.154	123.615	101.538	76.3077	88	81	91.6154	92.3846	96.6923	74.6923	217	216.923	243.462	214.692	83	72	310.308	261.923	218.923	241.769	279.615	262.692	302.923	258.462	108.077	99.3077	131.6	75.3	134.7	81.8	134.4	157.7	144.6	126.9	526.5	457.2	452.8	457	793.1	756.4	315.3	266	759.7	698.2	217.75	131.25	365.5	232.25	289.75
259.131	105	113.692	103.231	78.0769	118.231	77.1538	111.538	83.3846	95.6154	85.3846	177.154	199.385	199.231	227.231	112.923	93.8462	315.538	241.231	199.385	223.077	235.385	274.462	321.692	240.769	137.385	108	117.5	75.4	88.1	95.5	177.3	142.2	114.3	95.8	546.2	419.1	429.7	347.8	690.3	671.5	338.7	271.3	715.3	695	193.875	136.875	339	260.375	327.125
289.131	123.077	111	98.1538	99.4615	119.462	102.154	90.6154	101.615	101.077	71.5385	185	182.308	292.692	233.231	100.385	95.4615	325.462	246.846	206.538	212.231	261.615	207.538	346	253.769	104.538	111.769	105.3	73.5	102.2	113.1	167.6	130.6	157	99.7	552	461.9	527.1	332.4	688.5	665.2	343.1	282.6	755.1	708	190.25	134.125	389.875	224.25	371.125
319.131	104	103.462	104.385	82.3846	138.154	64.6154	99.1538	88.4615	73	66.7692	191.077	200.846	219.154	260.769	107.538	105.154	373.154	250.077	246.538	212.846	277.769	266.308	297.308	233.769	118.154	105.538	137.5	69.8	110.6	99.7	171.1	132.4	130.2	129.8	506.1	482.6	467	242.4	714.8	670.5	253.3	230.9	832.5	659.6	178.5	136.25	407.375	218.125	297.375
349.141	131.462	111.538	100.462	84	125.769	84.0769	90.1538	87.4615	93.5385	58.2308	186.538	193.615	227.231	238.385	107.846	68.7692	398.077	271.462	228.538	222.769	280.769	220.615	350.385	267.846	109.769	100.615	120.7	65.9	96.2	102.1	151.6	130.1	159.4	101.7	523.9	459.7	503.4	222.7	690.2	722	241.9	248.8	832.3	659.2	151	128.125	403.625	264.5	280.875
379.141	98.8462	112.462	106.846	98.0769	159.769	102.538	123.077	105.154	87.6154	73.6154	221.231	173.077	195.692	206.231	118.385	70.7692	411.154	246.923	232.231	238.692	302.308	272.308	350.077	285.615	142.846	104.308	128	80.4	103.5	75.8	178.4	113.6	142.7	125.4	503.8	448.8	470	159.8	709.2	655.3	243.6	231.7	797.6	667.4	147.125	142.125	441.375	250.375	354.75
409.141	106	114.385	125.769	91.5385	147.538	91.4615	105.462	94.3077	82.0769	50.4615	202.308	193.462	280.462	263.615	110.846	99.6154	413.385	244.231	243	235.077	316.615	226	326.231	254.462	125.615	122.923	128.8	77.8	105.1	92.4	185.9	138.3	131.6	101.1	488.8	467.4	460.6	177.4	761.2	709.5	204	262.8	738.7	562.3	131	88.625	520.75	232.375	347.875
439.141	132.923	122.462	104.769	83.3846	185.615	82.1538	111.231	107.615	90.7692	87.6923	197.308	155.923	259.462	256.692	133.923	65.9231	410.385	224.538	238.846	177.923	314.923	234	409.615	287.308	119.077	105.462	107.5	53.7	95.9	87.3	203.6	140.7	121.5	79	534.6	505.9	452.2	236.2	752.7	633.1	196.1	211.5	840.2	682.3	159.75	128.25	457.375	243.375	331.625
469.141	111.308	97.3077	110.154	103.846	180.308	110.231	97	89.3846	89.2308	58	185.769	191.769	285	255.385	125	100.692	494.462	264.846	263.308	198.615	331.462	240.231	410.462	234.538	127.923	81.9231	132	65.6	109.3	113	216.1	132	133.9	103.4	480.3	501	404.3	169.1	640.4	668.8	260.7	253.6	878.1	627.3	176.875	105.5	484.75	198.75	336.125
499.142	93.0769	113.462	99.1538	85.7692	180.769	81.9231	135	89.5385	88.0769	57	172.385	176.231	260	234.077	137.154	66.6154	488.692	228.231	238.308	212.923	356	229	432.154	294.154	120.154	87.7692	132.9	49.7	126.4	94.3	179.8	126.3	144.4	133.6	500.9	484	451.1	224.1	711.3	637.8	255.8	254.8	867.8	631.2	154.25	138.375	573.875	209.25	332.75
529.142	127.538	84.2308	118.462	89.6923	183.538	104.077	130.538	113.538	118.231	66.0769	202.692	171.154	306.769	214.385	166.615	96.2308	516.154	251.077	255.769	211.462	388.538	210.308	458.769	280.538	123.308	114	123.6	48	111.3	104.9	202	115.8	148.1	88.4	437.4	478.7	493.8	199.1	730.9	612.4	266.9	232.6	783.3	688.2	112	120.375	544.5	191.25	315
559.142	125.923	112.077	136.923	84.2308	193.385	112.154	130.923	85.7692	97	62.0769	194.615	189.154	269.385	222.385	159.077	76.1538	525.462	280.231	260.231	184.385	303.538	237.615	443.538	260.692	103.462	110.769	134.5	61.4	120.5	92.6	198.7	98.1	130.4	105	533.5	460.2	441.6	143.9	800	614.1	354.6	202.1	887	654.3	161.125	127.625	582.875	240.25	350
589.142	112	112.077	122.923	84.9231	237.462	91.2308	127	87.2308	117.077	51.0769	204.077	186.846	281.769	255	142.308	75.3077	519	206	287.308	225.538	352	224.769	469.154	271.077	134.154	86.1538	151	52.9	90.3	83.7	218.7	131.3	132.3	83.1	623.4	446.9	430.4	164.1	703.1	654.2	350.5	148.8	835.3	642.2	127.5	78.75	416	196.75	359.625
619.152	136.385	108.615	138.231	86.8462	213.462	90.0769	144.385	79.9231	114.692	57.9231	220.923	165.231	344.385	228.538	176.077	97.7692	575.231	244.231	256.462	189.385	311.769	245.462	442.385	257.231	133.769	99.0769	107	57.7	142.1	115.6	190	118.8	146	97.4	596.6	472.8	370.6	129.7	829.1	647.9	362.8	194.8	846.7	705.6	156.875	102.875	464.125	223	367.75
649.152	139.385	117.692	137.846	104.923	233.385	100.385	157.077	104.538	120.846	47.9231	232.692	210.615	332.154	233.077	136.385	76.8462	629.538	249.308	270.308	217.923	331.923	226	427.231	299.154	122.308	110.769	138.3	59.6	95.2	99.4	197.1	128	157.4	88.7	597.3	412.9	394.1	162.1	861.6	608.8	342.5	202.4	791.7	594.9	196.5	78.375	574.875	215	344.25
679.152	119.154	109.308	132.077	71.2308	207.385	95.7692	120.077	79.7692	139.846	63.3846	220.615	186.538	347.538	228	151.462	74.7692	572.231	262.692	249.692	191.692	372	251	420.385	276.923	117.385	93.4615	139.2	56.8	112.3	74.9	167.3	151.5	164.2	95.8	599.8	445.1	376.4	148.2	765.7	609.4	307.8	195.5	835.3	579	207.375	112.375	462.875	191.25	366.875
709.152	124.308	100	140.385	98.6923	228.077	82	146.154	104.308	149.308	57.7692	218.538	180.385	371.538	198.769	205.923	80.8462	567	284.769	254.538	175.385	355.462	237.231	469.308	214.308	118.692	79.2308	127.1	60.4	145.3	94.5	215.6	107.1	150.2	91.9	603.9	436.5	405.1	164.5	843.4	628.4	299.6	200.8	881.1	599.6	206.75	96.125	460.25	176.5	372.375
739.153	153	117.923	139.923	75.3846	254.846	88.3846	152.769	90.6923	132	50.6923	207.615	176.538	388.231	220	179.308	80.6923	621.462	229.846	237.923	178.462	347.923	259	487.769	253.308	137	106.769	128.2	65.2	109.8	74.6	200.9	114.4	154.1	101.1	630.3	425.9	388.2	185	842.3	611.8	283.1	211.6	875.6	576.5	204.125	80.375	550.25	198.25	399.875
769.153	133.769	102.462	160.385	65.2308	248.538	79.9231	155.231	82.9231	109.231	42.2308	257	169.615	411	212.462	164.231	78.6154	547.615	269.923	301.769	182.615	331.231	257.769	487.692	260	121.538	107.462	116.6	49.4	113.2	92.8	167	119.5	235.3	83.8	621.8	462.7	404.7	164.6	831.2	685.1	359.5	218.7	770.2	547.1	175.25	108.75	518.125	166.5	410
799.153	126.846	92.5385	134.538	72.6923	230.154	77.9231	175.923	97.7692	136.231	64.8462	216.154	169.538	394.769	193.385	176.462	85.3846	590.538	264.385	269.538	236.231	343.692	252.846	497.231	295	104.231	84.2308	161.4	53.3	127.8	80.7	218.4	93.9	192.6	99	607.3	404.3	400.5	160.4	839.3	611.3	371	206.5	831.5	659.7	233.5	109.5	533.25	155.375	450.75
829.163	128.923	117.538	147.846	95.1538	223.538	65.9231	170.769	91.5385	143.077	56.1538	237.231	164.154	407.769	190.692	153.154	78.1538	569.231	261	298.308	185.846	341	210.769	478.923	277.231	117.308	109.462	138.2	65.2	107.6	76.4	204.8	131.7	182.6	109.7	568.3	372.9	398.5	169.6	930	666	333.7	209	792.5	651.4	203	111.25	553.75	184.5	363.5
859.163	136.462	110.846	175.692	69	225.846	73.3077	175.615	93.1538	119.846	70	298.462	163.154	366.923	210.692	152.615	68.2308	536.385	232	290.692	169.615	408.923	165.692	555.615	319.769	121.846	83.5385	148.5	61.5	139.3	101.8	187.8	125.2	210.3	109.1	633.3	455.4	342.1	135.9	886.8	595.4	382.2	243.5	800.9	609.9	269.875	122.875	532.625	206.625	351.375
889.163	159.077	127.923	203.769	65.3846	233.615	96.7692	188.077	121.769	150.846	69.1538	235.231	150.462	385.308	206.769	159.615	79.3846	597.308	241.231	264.462	192.538	376	227.077	608.769	287.692	147.308	84	172.4	73.5	151.3	81.7	230.1	130.7	289.6	108.3	639.4	433.1	446.5	135.3	896.4	640.6	418.5	180.7	755.1	639.5	268.25	101.375	565.375	220.625	426.75
	0 = mean of signal before frap
Ploted data	Calculation of total # cells in all fields
	1	2	3	4	5	6	7	8	9	10	11	12	13	14	15	16	17	18	19	20	21	22	23	24	25	26	27	28	29	30	31	32	33	34	35	36
0	100.122	97.3183	96.9959	98.1877	100.844	108.285	99.747	102.59	99.6438	101.422	99.4052	100.528	106.09	93.9175	99.1507	98.1264	100.875	98.8533	98.9618	99.3787	97.1245	100.071	96.2632	98.7756	100.522	100.695	100.977	101.74	98.44	94.1277	100.554	99.1095	#DIV/0!	#DIV/0!
13.89	61.3048	111.976	69.1914	55.5227	67.0423	74.8286	70.3727	85.2539	64.4044	64.748	95.7067	71.1307	98.5253	68.1548	87.9464	82.0856	59.6063	71.0468	64.6093	77.608	74.7365	74.8266	60	88.2408	62.253	76.3741	71.879	101.56	84.3698	70.7383	79.1667	68.4276	#DIV/0!	#DIV/0!
19.12	73.2821	77.7304	84.0862	99.018	48.6023	78.6191	72.496	88.6228	84.347	53.6509	92.0841	74.5757	77.7259	102.442	74.7942	99.1443	77.4962	70.4062	78.9569	74.9875	71.5623	97.5851	111.041	88.5412	89.9585	75.9378	90.6759	71.8835	92.824	70.4293	69.1345	65.4481
49.12	139.439	126.253	81.6212	80.4589	95.9911	96.9372	96.3703	92.8634	96.3561	76.5343	99.4542	87.8236	92.434	108.18	108.342	95.8853	78.8391	90.2525	78.1506	97.0027	88.743	120.887	101.373	85.0372	125.595	87.4515	107.286	73.8519	107.052	94.9318	87.439	67.8352
79.12	79.7595	114.273	66.2037	90.5847	137.176	83.2788	96.3432	100.185	108.227	87.3289	87.0375	135	101.145	127.873	81.8447	83.4084	111.645	79.9169	81.0401	87.7612	95.6017	109.528	100.385	139.126	111.155	65.9402	99.8031	111.194	94.4358	121.585	85.2291	91.1255
109.13	109.445	105.383	144.032	118.472	109.392	90.3868	100.457	115.454	121.1	80.0526	105.241	113.076	92.3127	146.711	87.0833	106.529	120.107	94.0935	83.2237	109.711	101.661	90.1497	94.6864	95.2872	108.345	60.9369	84.7352	56.4472	89.9038	79.4702	104.423	93.4509
139.13	88.2515	121	111.047	126.799	100.098	85.6322	102.15	111.141	114.351	80.6992	145.578	145.396	81.9453	186.618	86.0878	100.593	92.154	99.4554	84.8301	109.101	84.8497	100.997	110.009	116.744	103.775	79.5689	96.6661	67.3531	78.4895	109.901	93.9425	90.1921
169.13	68.4211	111.665	217.311	106.701	97.6384	89.0334	85.8769	128.025	104.117	77.208	123.704	121.91	110.129	146.706	95.0606	93.663	97.4167	119.288	80.4502	102.033	95.8333	107.625	132.423	122.15	78.7649	54.8484	99.4368	76.287	85.533	90.019	103.441	84.877
199.13	73.1868	81.7568	143.642	148.543	85.5848	94.8708	108.254	91.5447	106.688	94.3662	106.089	125.173	121.19	195.436	91.7744	82	91.4459	116.072	94.5046	108.218	126.735	123.886	130.484	138.614	120.868	57.5722	99.0129	84.9256	97.8756	111.343	88.3004	92.6184
229.13	91.537	133.065	108.642	99.1674	129.454	100.035	113.4	115.278	118.473	90.5504	106.442	117.202	108.83	174.768	164.67	85.2251	113.948	115.157	99.081	104.852	118.534	108.808	165.905	157.374	124.49	85.7343	99.0054	72.2793	118.687	94.5319	103.648	81.8916
259.131	92.3545	132.217	153.24	133.764	111.982	88.8503	87.6777	120.328	130.804	89.3793	85.7623	133.61	127.208	155.836	92.2513	124.684	119.311	130.327	123.548	102.8	124.843	102.921	141.644	130.197	122.29	67.7218	109.933	80.88	149.945	76.5638	84.7307	91.5574
289.131	110.88	98.6852	116.943	89.1749	141.29	101.477	125.495	105.157	131.848	97.3179	126.056	136.344	93.5306	143.265	90.3625	128.331	157.472	119.506	158.574	103.503	121.408	106.653	141.845	173.857	155.608	73.6059	113.189	102.434	130.945	91.2745	117.182	104.937
319.131	100.52	126.704	213.81	112.087	109.332	95.136	84.0413	102.268	149.216	115.829	104.304	127.18	111.953	196.991	110.933	129.23	100.308	104.869	192.657	106.607	109.701	126.213	131.009	186.762	113.34	119.948	134.718	71.3107	125.758	94.4814	104.062	76.7052
349.141	117.862	119.597	149.588	103.078	160.634	96.3449	95.3211	156.823	146.642	102.59	127.266	130.816	109.098	183.156	94.2214	116.526	156.735	113.966	226.044	95.5956	97.2267	126.259	117.854	152.599	105.295	103.994	157.191	91.0297	181.548	152.416	104.162	74.391
379.141	87.8933	108.941	155.814	117.045	119.018	127.822	94.89	167.283	166.511	97.2929	111.017	122.569	136.947	159.204	136.544	157.042	113.796	112.255	294.118	108.225	105.136	119.509	103.518	176.286	122.065	114.841	138.932	109.161	189.881	110.093	115.764	98.303
409.141	92.6698	137.395	161.312	111.827	162.652	104.573	106.39	111.274	169.26	103.37	140.095	128.204	102.19	165.553	113.745	134.418	130.168	104.579	259.639	107.287	77.6256	131.371	147.814	224.099	134.444	86.6821	215.921	120.918	214.672	203.026	149.745	110.424
439.141	108.543	125.646	225.936	103.36	103.509	126.542	101.079	203.151	182.768	134.241	134.583	142.57	112.91	200.186	109.851	144.705	153.797	105.673	191.448	118.891	92.7187	123.142	124.561	187.93	129.163	92.3701	212.229	133.784	206.645	142.643	144.451	103.929
469.141	114.387	106.074	163.573	108.52	153.846	96.8712	111.596	124.141	186.698	132.572	137.976	175.008	156.15	201.22	96.7257	163.712	129.497	95.8683	239.089	95.7536	102.8	139.981	167.654	243.899	164.465	118.412	221.832	265.859	193.819	139.432	114.561	115.609
499.142	82.0339	115.605	220.657	150.773	154.521	97.8175	111.075	205.889	214.122	111.922	155.459	146.914	136.897	267.404	134.04	142.359	108.084	103.492	201.294	111.524	100.392	137.484	111.472	274.253	151.595	103.641	231.376	125.408	187.105	133.221	124.265	125.886
529.142	151.416	132.075	176.349	114.973	178.929	118.427	143.093	173.141	205.576	120.953	184.748	163.532	108.165	257.5	106.101	174.439	167.534	91.3725	248.016	119.35	114.746	113.819	93.0426	284.706	154.034	98.7805	187.83	93.6242	211.547	126.185	128.408	116.094
559.142	112.354	162.557	172.428	152.646	156.258	102.887	121.135	208.889	187.51	141.135	127.744	170.139	93.4028	219.055	130.13	202.548	124.19	115.928	306.88	130.272	175.458	135.565	126.249	242.612	138.545	89.9911	202.406	121.078	196.899	151.983	132.788	136.009
589.142	99.9314	144.746	260.287	145.591	229.217	109.222	110.498	188.968	251.942	127.387	156.605	173.07	155.714	285.444	107.885	166.565	159.206	139.494	262.279	107.475	235.551	130.069	161.905	211.436	158.164	85.5263	187.016	114.593	158.936	164.451	155.34	138.783
619.152	125.567	159.167	236.977	180.654	198.008	133.706	150.69	180.094	235.528	135.418	127.013	171.98	135.016	185.442	122.924	159.933	149.897	126.184	285.736	127.967	186.242	119.997	152.491	208.128	159.199	85.6988	177.704	132.928	159.155	145.992	149.375	138.571
649.152	118.431	131.378	232.49	150.258	252.167	110.482	142.508	177.477	252.515	124.038	146.869	142.813	110.417	232.047	95.7746	153.984	177.452	144.66	243.122	141.524	169.219	133.081	250.718	267.384	130.398	72.0909	163.439	130.822	177.129	174.508	215.303	135.975
679.152	109.008	185.421	216.546	150.53	220.631	118.268	152.429	202.572	217.833	130.257	148.207	151.806	125.597	245.07	149.933	110.429	171.399	134.756	253.981	125.648	157.442	144.266	184.538	242.026	156.283	70.4047	185.792	159.833	205.491	237.858	244.963	137.851
709.152	124.308	142.245	278.143	140.118	258.455	121.151	186.92	254.71	199.109	145.132	149.838	218.988	149.806	210.43	153.757	201.307	163.439	138.351	246.261	134.214	149.203	146.948	215.085	260.765	151.912	74.8648	174.832	136.212	222.651	168.304	269.72	151.981
739.153	129.746	185.612	288.338	168.448	260.395	117.603	176.469	222.212	270.382	133.319	134.333	192.56	128.314	196.626	147.185	175.612	152.423	147.992	209.838	137.676	133.79	151.882	253.966	277.554	150.258	90.6599	163.34	140.206	173.556	210.473	238.647	117.498
769.153	130.556	245.873	310.972	187.199	258.652	151.519	193.447	208.904	202.878	165.249	128.499	187.574	113.099	236.032	121.983	139.749	280.788	134.385	245.869	121.325	164.38	140.779	161.149	311.186	167.689	112.089	163.083	194.238	192.056	130.138	247.233	129.415
799.153	137.074	185.079	295.36	179.937	210.083	127.495	204.137	206.667	223.363	114.1	135.929	168.553	123.744	302.814	158.364	232.588	194.545	150.21	249.688	137.298	179.661	126.042	213.242	343.202	186.068	101.879	178.871	180.293	190.212	179.785	324.506	148.41
829.163	109.686	155.376	339.09	186.555	254.795	144.517	213.836	195.965	218.096	160.513	161.788	172.752	107.168	211.963	140.838	155.505	166.454	152.4	234.965	139.64	159.665	121.661	182.472	300.136	154.928	107.728	193.687	168.435	197.208	157.108	308.99	142.415
859.163	123.109	254.627	308.08	188.522	171.209	182.933	174.151	223.675	231.2	171.383	246.797	173.755	145.856	241.463	136.837	150	192.759	139.065	251.729	148.942	156.961	131.317	219.634	257.774	140.761	134.262	144.602	179.609	224.775	307.614	263.129	128.574
889.163	124.354	311.647	241.415	154.454	218.131	156.339	186.347	201.066	247.608	137.355	165.583	211.604	175.366	234.558	185.19	176.052	267.405	147.633	330.007	139.931	231.599	118.077	264.612	256.261	174.273	117.331	155.838	203.818	221.429	294.53	352.095	117.732
0	#DIV/0!	#DIV/0!	#DIV/0!	#DIV/0!	#DIV/0!	#DIV/0!	#DIV/0!	#DIV/0!	#DIV/0!	#DIV/0!	#DIV/0!	#DIV/0!	#DIV/0!	#DIV/0!	#DIV/0!	#DIV/0!	#DIV/0!	#DIV/0!	#DIV/0!	#DIV/0!	#DIV/0!	#DIV/0!	#DIV/0!	#DIV/0!	#DIV/0!	#DIV/0!	#DIV/0!	#DIV/0!	#DIV/0!	#DIV/0!	#DIV/0!	#DIV/0!
Channel,001 - GFP	RAW DATA imported LAS AF software																										Channel,001																			Channel,001
Axis [s] - TIME	ROI2 []	ROI3 []	ROI4 []	ROI5 []	ROI6 []	ROI7 []	ROI8 []	ROI9 []	ROI10 []	ROI11 []	ROI12 []	ROI13 []	ROI14 []	ROI15 []	ROI16 []	ROI17 []	ROI18 []	ROI19 []	ROI20 []	ROI21 []	ROI22 []	ROI23 []	ROI24 []	ROI25 []	ROI1 []	ROI26 []	Axis [s]	ROI1 []	ROI2 []	ROI3 []	ROI4 []	ROI5 []	ROI6 []	ROI7 []	ROI8 []	ROI9 []	ROI10 []	ROI11 []	ROI12 []	ROI13 []	ROI14 []	ROI15 []	ROI16 []	ROI17 []	ROI18 []	Axis [s]	ROI1 []	ROI2 []	ROI3 []
0	89.8462	90.6154	111.615	90.2308	219.846	240.462	101	300	241.923	213.154	284.077	105.692	177	99.5385	81.5385	112.692	85.9231	233.769	234	99.3077	300.692	224.923	232.154	288.769	163.538	110.923	0	101.1	114.8	170.4	117.6	497.4	443.3	893.3	281.6	773.5	124.5	137.3	158.9	118.1	462.5	486.7	895.9	280.7	764.8	0	189.5	301.375	301.5
5.17	83.2308	73.3077	96.7692	93.6923	252.692	244.769	78.7692	324.077	213.308	249.615	257.308	127.462	138.923	78.3077	87.4615	99.5385	96.4615	202.615	252.462	75.9231	325.615	223.923	233.385	249.769	152.769	108.846	5.17	119.7	118.7	138.6	124.4	450.9	529	882.1	309.5	787.8	110.6	98.2	156	121.8	496.8	495.8	890.6	327.9	795.4	5.16	174.375	313.75	324.25
13.89	71.9231	52	72.3077	54.9231	151.154	171.385	67.1538	175.923	146.231	222.923	186.308	107.923	154.462	64.2308	75.1538	130.231	81.9231	202	243.538	78.7692	273.154	225.846	232.923	261.923	94.6923	109.538	13.68	68.7	78.8	122.8	75.7	353.6	310.9	584	248.2	560.9	100.8	89.6	149.6	127	497.7	481.2	752.5	332.1	749.6	14.46	112.875	234.5	185.125
19.12	70.0769	63	93.0769	41.4615	154.154	173.154	79.6923	210.154	131.692	202.231	185.923	102.538	150	90.1538	74.9231	94	85.3077	196.077	238.846	89.9231	249.154	245.462	219.615	249.308	109.923	131.923	18.91	83.9	72.7	162.2	100.9	327.6	393.6	598.4	221.7	650.6	81.9	97.2	163.6	130.2	465.3	498.5	798	309.8	666.7	19.69	176	240.5	271
49.12	89.1538	78.2308	78.2308	66.3077	187.462	222.615	81.0769	284.769	163.077	252.308	237.462	121.231	115.077	70.6154	95.8462	97.2308	69.0769	193.385	231	87.3077	295.538	213.077	253.692	270.385	160.462	131.154	48.911	93.9	103.9	153.8	107.3	411.1	400.6	767	236.5	842.1	86.8	95.9	160.4	136.1	455.5	512.6	790.7	266.5	696.6	49.69	175.375	271.375	290.125
79.12	99.1538	66	91.7692	81.4615	176.231	204.692	83.1538	281.308	171.769	247.923	294.923	115.538	153.538	86.7692	99.6923	101.308	59.3846	211.615	212.462	83	259.923	196.692	284.846	218.462	122.462	114.231	78.911	96.8	84.3	129.7	120.8	365.3	475.3	701.3	230.4	731.1	75.7	103	155.5	108.2	457.1	586.5	799.1	241	667.5	79.7	130.5	362.25	280.25
109.13	96.3846	110.462	102.615	63.6154	181.538	253.769	89.0769	309.923	140.462	273.385	275.385	109.923	126.231	91.4615	76.6923	86.6154	58.1538	200.846	252.615	77.1538	255.923	175.462	259.769	243.538	138.154	119.077	108.921	109.3	104.5	159.9	134.4	458.8	417.7	740	226.5	644.3	74.5	120	150.1	111.9	487.6	501.9	674.5	222.8	714.7	109.7	135.875	323.5	292.125
139.13	102.385	73.4615	103	78.6923	206.308	241.231	96.6923	309.538	170.462	305.154	293.923	103.692	139.462	84.6154	66.1538	81.2308	78.6154	240.923	236.154	87	270.692	211.231	209.615	202.154	123.077	126.538	138.921	103.2	92.2	152.7	124.5	474.8	392	761.2	220.1	708.8	55.3	107.1	151.8	135.1	477.4	462.1	697.7	259.4	701.8	139.7	147	315.5	274.875
169.13	96.4615	99.4615	96.7692	92.2308	194.846	214.692	92.7692	284	187.615	256.923	303.462	124.615	144.692	86.3846	45.7692	90.6923	94.4615	218.846	250	72.4615	272.769	243	207.692	248.923	99	113.154	168.921	100.2	102	134.5	116.9	532.5	407.4	753	282.9	767.8	68.3	107.3	143.6	120	446.4	506.4	738	295.2	713.4	169.7	194	352.25	247.125
199.13	74.4615	108.615	125.462	79.9231	194.923	252.231	86.6154	278.538	211.308	278.769	306	117.462	140	91.0769	75.6154	84.4615	93.3846	205.462	233	94.6154	261.077	223.923	262.769	244.462	102.462	96.9231	198.921	141.3	78.1	135.3	120.8	553.2	471.2	771.7	336.1	814.8	72.3	85.1	165	132.1	476.6	498.6	713.1	265.2	657.7	199.701	188.875	350	306.25
229.13	101.538	88	91.6154	96.6923	217	243.462	83	310.308	218.923	279.615	302.923	108.077	123.615	76.3077	81	92.3846	74.6923	216.923	214.692	72	261.923	241.769	262.692	258.462	113.154	99.3077	228.921	131.6	134.7	134.4	144.6	526.5	452.8	793.1	315.3	759.7	75.3	81.8	157.7	126.9	457.2	457	756.4	266	698.2	229.701	217.75	365.5	289.75
259.131	103.231	118.231	111.538	95.6154	177.154	199.231	112.923	315.538	199.385	235.385	321.692	137.385	113.692	78.0769	77.1538	83.3846	85.3846	199.385	227.231	93.8462	241.231	223.077	274.462	240.769	105	108	258.921	117.5	88.1	177.3	114.3	546.2	429.7	690.3	338.7	715.3	75.4	95.5	142.2	95.8	419.1	347.8	671.5	271.3	695	259.701	193.875	339	327.125
289.131	98.1538	119.462	90.6154	101.077	185	292.692	100.385	325.462	206.538	261.615	346	104.538	111	99.4615	102.154	101.615	71.5385	182.308	233.231	95.4615	246.846	212.231	207.538	253.769	123.077	111.769	288.921	105.3	102.2	167.6	157	552	527.1	688.5	343.1	755.1	73.5	113.1	130.6	99.7	461.9	332.4	665.2	282.6	708	289.711	190.25	389.875	371.125
319.131	104.385	138.154	99.1538	73	191.077	219.154	107.538	373.154	246.538	277.769	297.308	118.154	103.462	82.3846	64.6154	88.4615	66.7692	200.846	260.769	105.154	250.077	212.846	266.308	233.769	104	105.538	318.922	137.5	110.6	171.1	130.2	506.1	467	714.8	253.3	832.5	69.8	99.7	132.4	129.8	482.6	242.4	670.5	230.9	659.6	319.711	178.5	407.375	297.375
349.141	100.462	125.769	90.1538	93.5385	186.538	227.231	107.846	398.077	228.538	280.769	350.385	109.769	111.538	84	84.0769	87.4615	58.2308	193.615	238.385	68.7692	271.462	222.769	220.615	267.846	131.462	100.615	348.932	120.7	96.2	151.6	159.4	523.9	503.4	690.2	241.9	832.3	65.9	102.1	130.1	101.7	459.7	222.7	722	248.8	659.2	349.711	151	403.625	280.875
379.141	106.846	159.769	123.077	87.6154	221.231	195.692	118.385	411.154	232.231	302.308	350.077	142.846	112.462	98.0769	102.538	105.154	73.6154	173.077	206.231	70.7692	246.923	238.692	272.308	285.615	98.8462	104.308	378.932	128	103.5	178.4	142.7	503.8	470	709.2	243.6	797.6	80.4	75.8	113.6	125.4	448.8	159.8	655.3	231.7	667.4	379.711	147.125	441.375	354.75
409.141	125.769	147.538	105.462	82.0769	202.308	280.462	110.846	413.385	243	316.615	326.231	125.615	114.385	91.5385	91.4615	94.3077	50.4615	193.462	263.615	99.6154	244.231	235.077	226	254.462	106	122.923	408.932	128.8	105.1	185.9	131.6	488.8	460.6	761.2	204	738.7	77.8	92.4	138.3	101.1	467.4	177.4	709.5	262.8	562.3	409.711	131	520.75	347.875
439.141	104.769	185.615	111.231	90.7692	197.308	259.462	133.923	410.385	238.846	314.923	409.615	119.077	122.462	83.3846	82.1538	107.615	87.6923	155.923	256.692	65.9231	224.538	177.923	234	287.308	132.923	105.462	438.932	107.5	95.9	203.6	121.5	534.6	452.2	752.7	196.1	840.2	53.7	87.3	140.7	79	505.9	236.2	633.1	211.5	682.3	439.712	159.75	457.375	331.625
469.141	110.154	180.308	97	89.2308	185.769	285	125	494.462	263.308	331.462	410.462	127.923	97.3077	103.846	110.231	89.3846	58	191.769	255.385	100.692	264.846	198.615	240.231	234.538	111.308	81.9231	468.932	132	109.3	216.1	133.9	480.3	404.3	640.4	260.7	878.1	65.6	113	132	103.4	501	169.1	668.8	253.6	627.3	469.712	176.875	484.75	336.125
499.142	99.1538	180.769	135	88.0769	172.385	260	137.154	488.692	238.308	356	432.154	120.154	113.462	85.7692	81.9231	89.5385	57	176.231	234.077	66.6154	228.231	212.923	229	294.154	93.0769	87.7692	498.932	132.9	126.4	179.8	144.4	500.9	451.1	711.3	255.8	867.8	49.7	94.3	126.3	133.6	484	224.1	637.8	254.8	631.2	499.712	154.25	573.875	332.75
529.142	118.462	183.538	130.538	118.231	202.692	306.769	166.615	516.154	255.769	388.538	458.769	123.308	84.2308	89.6923	104.077	113.538	66.0769	171.154	214.385	96.2308	251.077	211.462	210.308	280.538	127.538	114	528.932	123.6	111.3	202	148.1	437.4	493.8	730.9	266.9	783.3	48	104.9	115.8	88.4	478.7	199.1	612.4	232.6	688.2	529.722	112	544.5	315
559.142	136.923	193.385	130.923	97	194.615	269.385	159.077	525.462	260.231	303.538	443.538	103.462	112.077	84.2308	112.154	85.7692	62.0769	189.154	222.385	76.1538	280.231	184.385	237.615	260.692	125.923	110.769	558.933	134.5	120.5	198.7	130.4	533.5	441.6	800	354.6	887	61.4	92.6	98.1	105	460.2	143.9	614.1	202.1	654.3	559.722	161.125	582.875	350
589.142	122.923	237.462	127	117.077	204.077	281.769	142.308	519	287.308	352	469.154	134.154	112.077	84.9231	91.2308	87.2308	51.0769	186.846	255	75.3077	206	225.538	224.769	271.077	112	86.1538	588.943	151	90.3	218.7	132.3	623.4	430.4	703.1	350.5	835.3	52.9	83.7	131.3	83.1	446.9	164.1	654.2	148.8	642.2	589.722	127.5	416	359.625
619.152	138.231	213.462	144.385	114.692	220.923	344.385	176.077	575.231	256.462	311.769	442.385	133.769	108.615	86.8462	90.0769	79.9231	57.9231	165.231	228.538	97.7692	244.231	189.385	245.462	257.231	136.385	99.0769	618.943	107	142.1	190	146	596.6	370.6	829.1	362.8	846.7	57.7	115.6	118.8	97.4	472.8	129.7	647.9	194.8	705.6	619.722	156.875	464.125	367.75
649.152	137.846	233.385	157.077	120.846	232.692	332.154	136.385	629.538	270.308	331.923	427.231	122.308	117.692	104.923	100.385	104.538	47.9231	210.615	233.077	76.8462	249.308	217.923	226	299.154	139.385	110.769	648.943	138.3	95.2	197.1	157.4	597.3	394.1	861.6	342.5	791.7	59.6	99.4	128	88.7	412.9	162.1	608.8	202.4	594.9	649.722	196.5	574.875	344.25
679.152	132.077	207.385	120.077	139.846	220.615	347.538	151.462	572.231	249.692	372	420.385	117.385	109.308	71.2308	95.7692	79.7692	63.3846	186.538	228	74.7692	262.692	191.692	251	276.923	119.154	93.4615	678.943	139.2	112.3	167.3	164.2	599.8	376.4	765.7	307.8	835.3	56.8	74.9	151.5	95.8	445.1	148.2	609.4	195.5	579	679.723	207.375	462.875	366.875
709.152	140.385	228.077	146.154	149.308	218.538	371.538	205.923	567	254.538	355.462	469.308	118.692	100	98.6923	82	104.308	57.7692	180.385	198.769	80.8462	284.769	175.385	237.231	214.308	124.308	79.2308	708.943	127.1	145.3	215.6	150.2	603.9	405.1	843.4	299.6	881.1	60.4	94.5	107.1	91.9	436.5	164.5	628.4	200.8	599.6	709.723	206.75	460.25	372.375
739.153	139.923	254.846	152.769	132	207.615	388.231	179.308	621.462	237.923	347.923	487.769	137	117.923	75.3846	88.3846	90.6923	50.6923	176.538	220	80.6923	229.846	178.462	259	253.308	153	106.769	738.943	128.2	109.8	200.9	154.1	630.3	388.2	842.3	283.1	875.6	65.2	74.6	114.4	101.1	425.9	185	611.8	211.6	576.5	739.723	204.125	550.25	399.875
769.153	160.385	248.538	155.231	109.231	257	411	164.231	547.615	301.769	331.231	487.692	121.538	102.462	65.2308	79.9231	82.9231	42.2308	169.615	212.462	78.6154	269.923	182.615	257.769	260	133.769	107.462	768.943	116.6	113.2	167	235.3	621.8	404.7	831.2	359.5	770.2	49.4	92.8	119.5	83.8	462.7	164.6	685.1	218.7	547.1	769.723	175.25	518.125	410
799.153	134.538	230.154	175.923	136.231	216.154	394.769	176.462	590.538	269.538	343.692	497.231	104.231	92.5385	72.6923	77.9231	97.7692	64.8462	169.538	193.385	85.3846	264.385	236.231	252.846	295	126.846	84.2308	798.944	161.4	127.8	218.4	192.6	607.3	400.5	839.3	371	831.5	53.3	80.7	93.9	99	404.3	160.4	611.3	206.5	659.7	799.733	233.5	533.25	450.75
829.163	147.846	223.538	170.769	143.077	237.231	407.769	153.154	569.231	298.308	341	478.923	117.308	117.538	95.1538	65.9231	91.5385	56.1538	164.154	190.692	78.1538	261	185.846	210.769	277.231	128.923	109.462	828.954	138.2	107.6	204.8	182.6	568.3	398.5	930	333.7	792.5	65.2	76.4	131.7	109.7	372.9	169.6	666	209	651.4	829.733	203	553.75	363.5
859.163	175.692	225.846	175.615	119.846	298.462	366.923	152.615	536.385	290.692	408.923	555.615	121.846	110.846	69	73.3077	93.1538	70	163.154	210.692	68.2308	232	169.615	165.692	319.769	136.462	83.5385	858.954	148.5	139.3	187.8	210.3	633.3	342.1	886.8	382.2	800.9	61.5	101.8	125.2	109.1	455.4	135.9	595.4	243.5	609.9	859.733	269.875	532.625	351.375
889.163	203.769	233.615	188.077	150.846	235.231	385.308	159.615	597.308	264.462	376	608.769	147.308	127.923	65.3846	96.7692	121.769	69.1538	150.462	206.769	79.3846	241.231	192.538	227.077	287.692	159.077	84	888.954	172.4	151.3	230.1	289.6	639.4	446.5	896.4	418.5	755.1	73.5	81.7	130.7	108.3	433.1	135.3	640.6	180.7	639.5	889.733	268.25	565.375	426.75
[truncated: 17 more columns]

## Sheet: WT2
REORGANIZED DATA FROM 3 FIELDS	CELL FRAP	CONTROL	CELL FRAP	CONTROL	CELL FRAP	CONTROL	CELL FRAP	CONTROL	CELL FRAP	CONTROL	CELL FRAP	CONTROL	CELL FRAP	CONTROL	CELL FRAP	CONTROL	CELL FRAP	CONTROL	CELL FRAP	CONTROL	CELL FRAP	CONTROL	CELL FRAP	CONTROL	CELL FRAP	CONTROL	CELL FRAP	CONTROL	CELL FRAP	CONTROL	CELL FRAP	CONTROL	CELL FRAP	CONTROL	CELL FRAP	CONTROL	CELL FRAP	CONTROL	CELL FRAP	CONTROL	CELL FRAP	CONTROL	CELL FRAP	CONTROL	CELL FRAP	CONTROL	CELL FRAP	CONTROL	CELL FRAP
Axis [s] - TIME	ROI1 []	ROI7 []	ROI2 []	ROI8 []	ROI3 []	ROI9 []	ROI4 []	ROI10 []	ROI5 []	ROI11 []	ROI6 []	ROI12 []	ROI1 []	ROI14 []	ROI2 []	ROI15 []	ROI3 []	ROI16 []	ROI4 []	ROI17 []	ROI5 []	ROI18 []	ROI6 []	ROI19 []	ROI7 []	ROI20 []	ROI8 []	ROI21 []	ROI9 []	ROI22 []	ROI10 []	ROI23 []	ROI11 []	ROI24 []	ROI12 []	ROI25 []	ROI13 []	ROI26 []	ROI1 []	ROI7 []	ROI2 []	ROI8 []	ROI3 []	ROI9 []	ROI4 []	ROI10 []	ROI5 []	ROI11 []	ROI6 []
0	3656.23	3506.08	1043.23	1062	1060.31	1206.31	1769.54	1464.08	3269.54	3437.46	1414.69	1573.77	4237.1	3819.5	2772.5	2805.9	1354.8	1379.9	952	861.1	2825.8	3411.8	1386.3	1429.4	2383.4	2220.6	1562.6	1763.2	910.7	781	1363.5	1065.8	3344.2	3190.2	2254.9	2132.9	4634.1	4545.5	2640.8	2532.7	2371.2	2669.6	3806.1	3802	1000.7	1011	2745.6	2654.1	4123.9
5.16	3384.23	3467.54	979.077	1007.92	1131.69	1053.31	1626.23	1741.85	3359.31	3092.15	1540.77	1467.23	3896.7	4199.3	2417.1	2368.9	1171	1290.8	1054.7	1181.9	3143.6	2653.7	1603.2	1460.5	1918.4	2094.1	1672.7	1506.3	792.4	781.2	1112.6	1426.9	3418.8	3619.3	2167.2	2321.5	4994.2	5067.8	2930.6	3075.5	2937.3	2480	3857.7	3717	1285.1	1166.1	2473.6	2662.2	4596.2
13.72	2340	3651.77	777.769	1054.31	891.462	940.538	1364	1745.23	1641.85	2700.23	1125.77	1343.69	2845.5	4239	2056.2	2879.1	1082.7	1247.3	735.2	856.9	1610.1	2879.9	832.8	1217.4	1833.9	2152.2	819	1554.2	734.5	795.8	766.4	1115.5	1941.3	3637.8	1622.7	2265.8	3189.2	4155.8	1783.2	2543.2	1859.6	2599.4	2228.1	3557.6	717.3	778.5	2119	2470.9	3661.9
18.95	2854.23	3442.92	855.615	1037	883.923	1224	1494.15	1744.31	2199.77	2971.92	1141.38	1512.77	2855.9	3372.3	2555.4	2986.9	1047	1466.5	788.9	993.8	1907.8	2765.2	1095.7	1095.8	1925.3	2047.3	1409.1	1337	788	648	924.5	1177.2	2262.1	3068.3	1775.5	2103.7	3713.7	3867.1	2219.5	2649.9	1675.3	2112.6	3104.8	3449.5	800	728.3	2086.8	2410.1	3422.5
48.95	3338.46	3303.69	1011	1059.31	892.385	1087.15	1265.77	1657.15	2588.62	3070.31	1174.85	1365.54	3887.9	3675.8	3245.4	3099.3	1406.4	1210.4	835.5	1035.4	2588.1	2301.8	1190.8	1124	2363.2	1671.3	1126.7	1275.6	1165.1	658.5	1628	1359.6	2798.5	2940.8	1880.7	2181.5	3878.9	4033.9	2038.6	2632.7	2032.3	2011.9	3294.3	3242	1067.8	1128.6	2560	2722.7	3705.3
78.95	2890.38	3749.15	1263.85	1124.38	838	926.538	1283.62	1806.38	2381.92	2335	1486.54	1076.77	3396.5	3451.5	2725.7	2775.8	1340.3	1298.1	772.3	774.8	2108	2936.4	908.6	1183.3	2191.7	1927.5	1716.9	1505.2	887.1	914.5	1414	1153.9	3126.4	3348.4	2056.6	1792.1	4084.9	3303.6	1943.2	2495.5	2623.9	2085.7	3072.1	3388.5	1154	836.6	2310.7	2101.1	3385.1
108.96	3564.15	3644	999.769	1209.77	920	917.462	1723.23	1535.23	2282.69	2266.38	1237.08	1242	3548.6	3359.6	2507.1	2748.7	1385.5	791	882	656.3	2185.3	2435.1	1236.7	1549.4	2173.6	1740.8	1541.7	1495.1	1114	1202.5	1073.1	827.2	3226.2	3861.1	1826.7	1660.9	3798.4	3432.6	2583.3	2427.8	2518.2	2137.6	2965	3421.1	897	1005.2	2689.2	2241.9	3316.7
138.96	3570.15	4155.08	1164.69	1246.92	830.923	996.308	1361.38	1391.85	2202.92	2048.85	1402.54	976	4086.2	3071.8	3045.6	2607.3	1471.2	915.9	1109.1	745.7	2273.3	2502.9	1527.2	1123	2920.1	1823.8	1294.9	1257.4	1112.2	913.6	1230.3	1088.4	3699.9	3595.9	2396.8	1623.6	4516.8	4039.9	2527.4	2458.1	2845.4	2087	2725.7	2707	1084.3	748.6	2257.8	2131	3848.1
168.961	3527.62	3815.46	1277.77	1155.62	681.231	907	1564.85	1765.31	2342.62	1969.08	1345.77	943	3613.1	3762.5	2454.4	2631.3	1266.2	738	1140.1	774.1	2612.5	2453.9	1507.3	1283.6	2936.2	1452.7	1245.4	1075.3	1130	945.5	1296.7	1219.7	4190.5	3685.3	2078	1538.5	3735.7	3470.4	2398.6	2062.5	2585.1	2450.9	3486.8	3024.9	1055.8	779.4	2475.5	1665.5	3356.8
198.961	3371.54	4474.23	1280.23	1112.77	744.077	875.231	1469.69	1518.23	2615.23	2139	1495.46	940.769	3518.2	3477.2	2674.9	2586.8	1439.4	783.1	1350.1	670	2893.8	2158.3	1492.1	1120	2958.8	1205.2	1245.6	1268.7	1355.4	1237.3	1705	1124.4	4434.4	3995.2	2169.8	1412.5	3511.8	2921.4	2172.7	2647.6	2764.5	2495.8	3129.6	3516.4	1095.6	899	2307.3	1758.4	3936.8
228.961	3498.15	3827.92	1478.54	1192	648.308	786	1416.92	1647.31	2503.92	2864.46	1365.85	806.385	3755	3481.7	2773.1	2283.2	1340.1	813	1413.5	749.2	2582.8	2467	1645.3	1429.9	2869.8	1161.7	1721.9	1206.2	1358.2	1310.3	1104.6	1100.1	4257	2992.2	2129.4	1243.5	4038.2	3394.7	2482	2216.7	3069	2391.3	3693.1	3871.4	1233.1	817.5	2604.9	1807.8	3596.5
258.961	3506.77	3639.38	1247.69	1273.92	768.385	701.692	1325.62	1479.46	2332.62	2516.23	1626.62	772.846	3981.1	3894.5	2987.7	2099.6	1630.4	843.7	1367.4	828.5	2446.9	2467.2	1835.5	1223.5	2877.8	969.9	1289.3	1487.9	2168.8	1071.4	1782.9	1206.3	4395.5	3604.2	2118	1275.1	4045	3314.8	2869.5	2877.6	2977.6	2291.4	3245	3972.3	1455.9	748.4	2575	1854.3	3768.7
288.961	3775.92	4004.85	1240.15	1167.54	775.462	638.769	1513.38	1589.38	2751.46	2177.92	1378.23	711.077	3800.6	3954.3	2920.8	2275.1	1285.9	930.8	1601.7	831.1	2549.6	2309.9	2089.3	983.6	2836	1259.9	1289.4	1370.4	2090.1	1143.6	1617.1	1124.2	4310.4	2905.4	2026.7	1328.9	3797.2	4588.8	3310.9	2908.8	2859.3	2416.9	3542.5	3535.5	1330	837.5	2885.3	1997.9	3800.4
318.961	3933.23	3993.08	1529.15	1161.69	741.615	676	1398	1648.46	2700.15	2311.54	1790.15	722.077	3901	4210.2	3230	2104.8	2114.1	1202.2	1768.4	793	2531.8	2827.9	1580.9	1290.2	3020.8	1054	1404.4	1297.1	1800.5	1087.1	1615.8	1195.7	4139.5	3119.8	1707.4	1109.2	3664.1	3830.3	3522.2	2789.4	3625	2287.5	3439.9	3254.3	1279.6	1184.6	2466.4	2046.2	4044.8
348.961	3829.54	3437.46	1306.69	1030.23	794.692	587.385	1196.31	1558	2505.31	2052.15	2162.77	831.308	4590.9	4490.4	2938.2	2025.3	1755.2	1373.5	1643.9	688.9	2590.1	2512.9	1853.2	1274.2	3388.6	865.9	1572.4	1467.4	2132.5	1127.3	1665.8	1192.8	5257.1	3687.8	2199.3	1070.7	3648.7	3902	4043	2604.8	3078	2268.4	2800.6	2799.5	1370.3	936.4	2606.3	1567.4	3294.4
378.971	4075.62	3259.08	1443.23	1189.08	707.769	612.692	1470	1678.31	1858.38	2233	1829.54	747.462	4347.1	3301.1	3197	2462.9	1598.4	1922.5	1446.8	897.9	2785.8	2713.8	1281.8	1146.3	2985	768.9	1570.7	1319.5	2345.6	967	1634.8	1130.8	3946.5	3410.5	1720.9	1314.2	3413.9	4682.8	3996.3	2423.7	4043.8	2195.3	2711.4	3083.6	1338.4	916.8	2559.6	1788.6	3250.1
408.972	4459.69	3479.77	1587.92	1338.15	951.769	678.077	1302.15	1575.54	2281	2410.08	2137	690.154	4327	3581.4	3154.8	2179.5	1710.1	2047.3	1920.4	783.8	2942.1	2597	1274.8	1302.8	3389.4	1182.5	1330.2	1100.7	2757.4	1160.3	1638.9	1232	4823	3400.5	1872.8	1151.9	3527.3	3427.6	3643.6	2230.3	3991.2	1992.3	2641.6	3406.3	1305.9	955.5	2617.4	1826.2	4043.7
438.972	4112.77	2917.77	1582.85	1314.46	818.615	651.308	1155.77	1620	2368	1985.15	1892.69	586.615	4760.5	3377.3	3406	1764	1796.6	1585.1	1686.7	1019.6	2735	2166.2	1557.5	1335.2	2798.6	917.9	997.1	1129.1	2494.3	1347.8	1182	1122.4	4749.9	3149.1	2226.6	1300.9	3452.4	4240.8	4231.4	2891.7	4212.7	1917.2	2348	2837.5	1470.1	885.2	3220.2	2098.1	3640.4
468.972	4386.15	3754.23	1758.69	1057.69	703.462	618.385	1678.54	1607	2643.38	2099.08	2078.69	646	5271.8	3245.5	3761.4	2529.4	1618.7	1447.1	1714	942.7	2841.2	2006.4	1427.1	1142.4	2983.4	857.6	1525.7	1391.5	2134.4	1060.9	1461.2	1112.7	4463	2820.7	1628.4	1198.3	3783.1	4339.1	4636.5	2415	3960.7	2056.1	2824	2642.7	1592.9	938.8	2953.3	1863.5	3714.7
498.972	4707.23	3111.38	1576	1083.23	750.231	538.846	1378.23	1710.31	2810.23	2794.54	2261.15	674.077	5167.7	3473.7	3442.6	2518.7	2142.6	1601.4	2013.9	1036.7	2430.9	2867.8	1166.4	1370.3	3490.3	871	1475.6	1015.5	1957.8	1142.5	1709.2	1097.7	5485.1	3261.6	2202.9	1235.2	3499.1	4180.1	4767.8	2796.2	4197.4	2001.9	3206.6	2662.6	1558.9	1460.3	3403.3	1965.1	3442
528.972	4310.77	3212.69	1841.46	1067.38	963.308	750.923	1794.23	1431.77	2729.31	2346.46	2465.92	767.769	5616.2	3385.2	3645.4	2224	2453	1663.2	2157.7	778.8	2938	2329.9	1252.2	1223.4	2331.6	716.3	1797.3	1357.9	2832.4	1164.3	1416.1	1184.5	5451.1	2917.7	1760.2	1466.2	3281.8	3632	4897.1	2379.7	3630.5	2282.1	3194	2728.9	1484.5	1175.5	2683.2	1876.5	3518.1
558.972	4743.46	3251.15	1632.23	1192.38	994.615	543.923	2565.08	1673.08	2808.77	2504.62	2401.77	514.077	5289.5	3950.3	4006	2151.2	2335.6	1478	1684.3	1015.5	2213	2356.7	1420.3	1375.9	3294.7	982	1422.5	1214.7	3663.9	1148.9	1457.2	1282.1	6278.4	3570.7	1790.1	1338.2	3598.3	4277	5114	2084.2	3895.5	2341.9	3066.7	2697.5	1679.8	1154.4	3061.9	2124.8	3435.3
588.972	4809.54	2613.38	1624.54	1364.77	1074.69	575.154	2298	1886.69	2676.77	1953.08	2145.46	777.538	5280.6	3783.1	4536	2631	2749.4	1471.4	2001.6	896.5	2368.2	2293.2	1231.1	1239.7	2955	892.5	1452.1	1211.7	3363	1013.6	1660.9	1024.9	6495.3	2901.1	1995.8	1214.4	3577.3	3476.1	3883.3	2209.3	4260.5	2239.6	4166.4	2592.5	1745.2	974	2826	2285.6	3531.1
618.982	4782.77	3217.38	1456.31	1114.69	1024.62	531.462	2410.92	1569.46	2803.46	2190.46	2487.38	837.462	5375.2	3682.7	4475.8	2665.3	2407.8	1288.2	2386.6	767.8	3036.8	2350.7	1520.8	1062	3061	787.5	1525.3	1354	3600.7	1063.9	1624.6	887.2	5332.3	2981.4	1994.4	1618.6	4443.5	4029.2	3641.7	2444.3	4692.3	2710.1	3900.1	2445.8	1554.3	1089.8	3004	2026.9	3681.7
648.983	4336.08	3202.54	1801.69	1181.31	1264.92	448.462	2944.08	1410.31	3038.08	2402.54	2261	790.538	5564.1	3514.8	4048.2	2347.6	2560.8	1494.3	2282.7	808	2767.4	2514.4	1809	1044.2	3423	1033.7	1446.7	1796.9	3681.4	947.5	1914.1	1047.3	6265.2	2769.5	2222.4	1386.4	4007.2	3588.7	3365.9	2501.7	4090.3	2240	4386	2600.2	1732.3	1194.7	2508	2122.4	3468
678.983	4402.15	3149.23	1578.69	1198.54	1224.23	505.769	2979.31	1474.23	2958.15	2801.54	2261.38	785.846	5413.4	3329.9	4505	2882.8	2987.4	1017.1	2705.1	919.7	2504.4	2217.1	2120.6	1249.7	3105.9	1000	1655	1410.7	3746.2	1000.4	1722.6	939.5	4902.1	2414.5	1857	1268.7	3993.8	3559.4	2948.1	2097.2	4280.8	2284.3	4236.3	2732.9	1506.3	995.4	2740.7	2166.1	2800
708.983	4306.23	3226.69	1695.85	1097.08	1289.08	635.769	3408.08	1726.69	2848.08	2671.46	2574.92	768.846	5630.6	3387.5	5372.5	2490.1	2697.4	1529	2376.4	1122.2	3020.5	2385.3	1902.5	1304.1	3607.2	982	1925.5	1173	4166.8	1164	1690.7	946.8	5100	2883	2011	1239.3	3746.8	3153.4	3652.4	1945.8	4406.2	2301	4579.5	3018.7	2088.7	977.7	2746.3	2157.9	3019.3
738.983	4615.92	3251	1583.62	1075.15	1134.92	574	3529.23	1733.08	2887.46	2651	2586.54	647.615	6113.8	3881.8	5054.9	3031.3	2982.8	1391.1	2153.3	987.5	2609.7	1965.1	1782	1056.6	2862.6	858.7	2029	1467.8	3957	1130.5	1313.5	1084.1	5020	2348.1	1771.9	1180	3856	3621	3269.5	2065.1	4633.8	2437.5	4411.7	2951	2241	1082.5	2839.9	2364.7	3285.6
768.983	4938	2656.69	1532.15	1064.69	1197.15	581	3858.62	1614.23	2692.77	2525.62	2829.54	696.385	5577.7	3772.4	5373.6	2878.1	2672.6	1415.9	2672	870.1	3085.1	2088.9	1795.6	1308.4	3296.8	887.3	2092.4	1327.9	3655.1	1243.4	1829	1226.5	5758	2711.6	2289.7	1173.1	4620.3	3621.5	3061.8	1937	4853.6	1633.6	4557.1	2937.3	1924.7	902.5	2550.9	2061.3	3098.7
798.983	4740.23	2891	1749.38	952.154	1263.46	621	3254.85	1383	3014.62	2489.08	2715.15	641.769	5772.1	3039.6	5161.1	3060.6	2854.8	1353	2070.9	906.2	2652.7	2631.2	1847.6	1146.1	3463.6	819.5	2073	1299.4	4397.8	1352.5	1671.3	1087.4	5844.2	2654.7	2541.4	1158.8	3703.5	3401.9	2693.8	2432.6	4346.2	1955.1	4771.5	2555.6	1876.7	992.6	3127.8	2127	3240
828.983	4461.77	3132.54	1903.77	1175.31	1162.38	653.308	3196.23	1676.77	2923.69	2249.77	3001	839.769	5357.4	3042	4855.9	2766.4	2845	1820.9	1829.3	969.1	2711.4	1827.6	1734.4	1248.6	3337.3	815.2	1897.8	1335.6	4869.4	903.6	1649.7	936.2	5634.8	2533.6	2738.8	1224.4	3544.5	3579.4	3300.3	2184.4	3883.8	1776.1	4615.5	2700.7	2084.4	929.9	2587.1	2135	3575.2
858.993	5707.69	2805.46	1811.77	1382.62	1169	586.231	3255.38	1374.92	2715.38	2824.69	2618.46	672.385	6397.5	3466.3	4729	2702.6	2936.2	1354.2	1994.4	952.8	3320.1	1925.5	2099.7	1076.7	3635	875.1	1986.9	1383.2	5150.1	1192.4	1833.2	1058.9	6957.6	2416.9	2810.6	1687.5	3055.5	3758.4	3355.1	2202.4	4095	2271.3	4444	3576.9	1960.1	998.8	2923.3	2179.1	2765.7
888.994	5303.85	3051.54	2093.62	1102.31	1254.31	676.769	3232.15	1394.15	3092.92	2431.69	2548.46	660.692	6297.3	3379	4454.2	2838.6	3246.1	1130.9	1772.9	880	3174.6	2397.2	2312.6	1327.1	4060.3	720.2	2064.6	1445.2	5301.5	1200.8	2088.1	896.4	6638.5	2499.7	2590.8	1221.8	3620.1	3039.5	3911	2131.8	4365	2112.5	4554.3	3144.4	2193.1	971.6	2368.1	2219.2	2958.9
	0 = mean of signal before frap
Ploted data	Calculation of total # cells in all fields
	1	2	3	4	5	6	7	8	9	10	11	12	13	14	15	16	17	18	19	20	21	22	23	24	25	26	27	28	29	30	31	32	33	34	35	36
0	100.959	97.6997	97.0077	105.922	101.52	97.1872	101.434	100.286	94.5745	98.2232	98.4156	103.446	99.701	98.954	109.019	99.3341	99.3171	99.2749	100.156	99.3438	103.086	101.926	104.993	98.1735	96.6387	102.157	99.3527	106.657	96.7588	99.2292	99.7368	100.104	97.2693	104.025
13.72	64.0785	73.7706	94.782	78.1559	60.8039	83.7818	67.1267	71.4182	86.8035	85.7976	55.9082	68.4081	85.2105	52.6959	92.2971	68.7046	53.3647	71.6171	76.7409	70.1164	71.5396	62.6293	92.1387	85.7582	82.6633	81.3585	91.6019	78.6793	90.8451	87.9108	87.8358	73.5758	79.9955	77.0995
18.95	82.9014	82.5087	72.2159	85.6588	74.0184	75.45	84.687	85.5536	71.3945	79.3822	68.9932	99.9909	94.0409	105.393	121.605	78.5338	73.7249	84.3989	96.0332	83.7579	79.3004	90.0072	109.845	86.5856	74.8333	111.379	88.717	107.993	80.2958	75.8322	93.9741	90.9327	90.1924	79.6364
48.95	101.052	95.4397	82.0845	76.3821	84.3113	86.0354	105.77	104.714	116.193	80.6935	112.438	105.943	141.399	88.3271	176.932	119.741	95.1612	86.2113	96.1576	77.4338	101.014	101.613	94.6128	94.0243	97.3542	108.034	97.7253	109.047	76.5622	104.666	95.9738	103.687	98.5563	107.923
78.95	77.0943	112.403	90.4442	71.0599	102.01	138.055	98.4065	98.1951	103.251	99.6773	71.7886	76.7853	113.707	114.065	97.0038	122.541	93.37	114.759	123.65	77.8682	125.804	90.6625	137.939	109.976	96.5571	103.151	109.879	125.592	74.5098	104.038	115.606	104.488	118.016	98.6495
108.96	97.8088	82.6413	100.277	112.246	100.72	99.6036	105.626	91.2104	175.158	134.39	89.7417	79.818	124.862	103.117	92.6403	129.727	83.5565	109.983	110.657	106.405	117.805	86.668	89.236	119.952	83.1232	98.6927	94.6938	106.106	54.9055	103.934	100.618	136.892	93.4098	101.087
138.96	85.9227	93.4053	83.4002	97.8114	107.52	143.703	133.023	116.81	160.629	148.733	90.8266	135.993	160.111	102.982	121.738	113.037	102.892	147.623	111.805	102.819	136.339	100.691	144.844	105.95	110.641	109.687	109.787	112.231	73.6919	101.671	97.9344	121.526	129.665	124.019
168.961	92.4558	110.57	75.1081	88.6444	118.97	142.711	96.0292	93.2771	171.572	147.281	106.463	117.428	202.12	115.819	119.513	106.313	113.709	135.067	107.645	116.296	105.476	115.27	135.463	148.634	96.0211	132.577	114.104	106.981	105.189	85.1629	100.901	116.556	146.099	135.842
198.961	75.3546	115.049	85.0149	96.803	122.264	158.962	101.179	103.406	183.808	201.507	134.078	133.223	245.503	98.1792	109.545	151.636	110.993	153.614	120.209	82.063	110.766	89.0001	121.869	131.216	107.745	135.355	102.818	104.079	72.6871	101.199	92.5203	141.733	184.7	143.157
228.961	91.3852	124.038	82.4819	86.0145	87.4134	169.379	107.85	121.457	164.834	188.668	104.694	115.064	247.035	142.754	103.656	100.409	142.27	171.242	118.956	111.968	128.34	95.3944	150.838	144.092	105.352	132.785	111.222	90.7775	77.9258	97.9473	100.35	121.246	157.77	126.055
258.961	96.3561	97.9409	109.504	89.6012	92.7028	210.471	102.224	142.299	193.244	165.045	99.1772	150.02	296.711	86.6523	202.427	147.799	121.955	166.105	122.028	99.7185	129.947	81.6907	194.535	138.866	101.821	148.187	100.885	103.412	93.4017	105.611	101.473	127.09	191.074	148.212
288.961	94.2838	106.22	121.399	95.2183	126.334	193.823	96.1131	128.381	138.15	192.72	110.377	212.414	225.097	94.0893	182.765	143.845	148.358	152.51	82.7493	113.824	118.304	100.198	158.806	144.417	111.051	150.96	90.2115	135.407	120.991	119.174	89.7455	125.23	202.253	143.75
318.961	98.5013	131.632	109.706	84.8063	116.812	247.917	92.6559	153.459	175.853	223.001	89.5293	122.531	286.603	108.272	165.624	135.134	132.685	153.931	95.6609	126.271	158.47	105.703	108.02	120.536	105.309	148.438	116.49	143.449	139.332	127.01	110.138	115.651	176.967	144.218
348.961	111.406	126.835	135.293	76.7848	122.082	260.165	102.238	145.075	127.79	238.627	103.072	145.44	391.338	107.156	189.169	139.655	142.554	205.408	93.5085	155.213	135.69	100.039	146.337	166.282	86.6241	155.966	99.3052	143.007	131.143	107.953	103.111	132.117	207.245	144.132
378.971	125.054	121.374	115.518	87.5882	83.2237	244.767	131.686	129.806	83.1417	161.132	102.653	111.821	388.217	119.038	242.565	144.57	115.716	130.947	72.903	164.884	184.203	87.9297	145.986	143.106	110.642	157.371	118.053	152.334	94.2297	125.301	113.048	116.268	225.61	144.968
408.972	128.161	118.665	140.363	82.6482	94.6443	309.641	120.819	144.749	83.5295	245.011	113.288	97.8508	286.63	120.85	237.645	133.028	141.832	162.584	102.909	163.368	200.331	77.5504	136.672	143.325	100.605	147.114	81.8719	135.28	83.9266	142.726	110.932	116.197	203.973	138.005
438.972	140.956	120.418	125.688	71.3438	119.285	322.646	140.956	193.084	113.343	165.428	126.258	116.649	304.892	88.3093	185.065	105.31	150.834	171.158	81.4092	146.329	219.732	82.7489	166.075	153.482	103.718	152.454	110.81	156.865	136.411	121.623	104.994	153.797	174.01	185.707
468.972	116.832	166.276	113.758	104.452	125.931	321.779	162.434	148.707	111.858	181.818	141.607	124.921	347.878	109.644	201.188	131.32	158.223	135.893	87.1863	191.988	192.632	106.86	169.674	158.481	105.411	152.12	93.4843	139.209	114.229	118.199	106.01	145.251	157.548	156.937
498.972	151.291	145.491	139.229	80.5838	100.562	335.444	148.766	136.682	133.795	194.261	84.7653	85.12	400.723	145.308	171.361	155.707	168.172	178.344	83.7085	170.51	209.671	120.431	106.752	173.187	99.7537	154.091	111.739	150.236	130.293	110.971	118.038	142.617	183.813	167.431
528.972	134.179	172.521	128.283	125.316	116.316	321.18	165.905	163.912	147.487	277.054	126.1	102.354	325.506	132.359	243.271	119.553	186.829	120.052	90.3579	205.786	159.086	117.043	126.287	142.99	112.572	167.545	111.309	171.339	150.692	161.995	119.686	120.529	134.688	210.233
558.972	145.901	136.888	182.86	153.315	112.144	467.2	133.901	186.222	158.024	165.859	93.9025	103.227	335.509	117.107	318.905	113.657	175.831	133.769	84.1314	245.37	166.339	113.687	145.513	144.103	103.327	187.548	97.718	157.74	133.119	176.747	108.985	120.318	226.268	196.159
588.972	184.035	119.034	186.853	121.8	137.054	275.93	139.584	172.406	186.856	223.268	103.271	99.3063	331.092	119.84	331.788	162.055	223.891	164.345	102.911	175.771	190.235	160.71	179.179	123.644	112.534	175.642	110.572	144.171	174.753	124.312	107.988	138.836	171.814	239.754
618.982	148.654	130.647	192.792	153.615	127.985	297.015	145.958	167.929	186.912	310.836	129.187	143.202	388.698	112.651	338.443	183.115	178.852	123.218	110.282	148.987	173.141	159.461	142.622	148.207	98.3491	192.799	121.969	150.658	128.302	165.386	113.967	136.977	155.464	187.49
648.983	135.395	152.517	282.058	208.754	126.453	286.008	158.305	172.44	171.371	282.512	110.062	173.243	331.141	80.5109	388.538	182.765	226.221	160.3	111.662	134.545	182.603	168.679	144.999	118.168	115.316	174.895	140.939	149.783	142.378	153.151	114.913	131.295	191.382	259.521
678.983	139.785	131.718	242.053	202.092	105.59	287.764	162.569	156.272	293.717	294.129	112.958	169.689	310.59	117.318	374.47	183.353	203.028	146.37	112.204	140.573	187.401	155.011	151.326	126.527	108.882	173.285	125.925	121.382	174.184	144.476	98.3181	149.155	213.777	262.452
708.983	133.457	154.579	202.759	197.376	106.611	334.907	166.217	215.754	176.416	211.763	126.63	145.886	367.332	164.152	357.973	178.57	176.899	162.269	118.818	187.707	191.491	151.704	213.634	127.267	119.302	201.544	124.852	149.031	197.874	189.252	114.913	135.026	202.771	248.431
738.983	141.985	147.292	197.722	203.64	108.92	399.394	157.499	166.757	214.42	218.056	132.802	168.654	333.364	138.234	350.022	121.16	213.79	150.161	106.49	158.322	190.105	149.498	207.021	120.096	119.221	184.173	116.762	159.671	171.12	170.495	104.611	144.799	170.585	253.616
768.983	185.87	143.906	206.051	239.037	106.618	406.318	147.855	186.707	188.756	307.091	147.69	137.236	371.554	157.572	293.96	149.124	212.347	195.184	127.58	158.069	297.111	155.146	213.263	123.752	115.627	180.551	123.919	128.978	199.603	189.057	120.642	149.476	144.925	213.896
798.983	163.965	183.729	203.456	235.347	121.114	423.073	189.897	168.63	210.998	228.526	100.817	161.208	422.648	159.535	325.161	153.697	220.145	219.313	108.866	110.737	222.301	186.708	189.069	147.052	108.445	208.235	132.664	169.552	228.329	193.869	112.631	134.4	188.332	193.18
828.983	142.433	161.98	177.923	190.618	129.955	357.36	176.114	175.531	156.241	188.763	148.359	138.908	409.384	142.093	538.889	176.212	222.403	223.685	99.025	151.085	218.67	170.9	224.153	121.176	118.408	181.972	133.592	171.541	190.224	229.899	123.78	115.17	175.403	180.552
858.993	203.449	131.039	199.41	236.768	96.1303	389.429	184.563	174.98	216.822	209.32	172.428	195.013	415.381	143.645	431.91	173.123	287.873	166.554	81.2979	152.338	180.293	124.242	196.245	134.152	96.534	176.917	140.317	169.902	185.826	178.984	116.318	103.707	171.961	183.136
888.994	173.809	189.93	185.338	231.836	127.192	385.726	186.366	156.915	287.037	201.466	132.43	174.26	563.774	142.859	441.497	232.943	265.572	212.048	119.102	183.46	206.627	144.838	225.72	106.71	102.402	167.003	132.315	160.319	196.192	189.708	128.721	110.753	174.525	137.992
Channel,001 - GFP	RAW DATA imported LAS AF software												Channel,001																											Channel,001
Axis [s]	ROI1 []	ROI2 []	ROI3 []	ROI4 []	ROI5 []	ROI6 []	ROI7 []	ROI8 []	ROI9 []	ROI10 []	ROI11 []	ROI12 []	Axis [s]	ROI1 []	ROI2 []	ROI3 []	ROI4 []	ROI5 []	ROI6 []	ROI7 []	ROI8 []	ROI9 []	ROI10 []	ROI11 []	ROI12 []	ROI13 []	ROI14 []	ROI15 []	ROI16 []	ROI17 []	ROI18 []	ROI19 []	ROI20 []	ROI21 []	ROI22 []	ROI23 []	ROI24 []	ROI25 []	ROI26 []	Axis [s]	ROI1 []	ROI2 []	ROI3 []	ROI4 []	ROI5 []	ROI6 []	ROI7 []	ROI8 []	ROI9 []
0	3656.23	1043.23	1060.31	1769.54	3269.54	1414.69	3506.08	1062	1206.31	1464.08	3437.46	1573.77	0	4237.1	2772.5	1354.8	952	2825.8	1386.3	2383.4	1562.6	910.7	1363.5	3344.2	2254.9	4634.1	3819.5	2805.9	1379.9	861.1	3411.8	1429.4	2220.6	1763.2	781	1065.8	3190.2	2132.9	4545.5	0	2640.8	2371.2	3806.1	1000.7	2745.6	4123.9	2532.7	2669.6	3802
5.16	3384.23	979.077	1131.69	1626.23	3359.31	1540.77	3467.54	1007.92	1053.31	1741.85	3092.15	1467.23	5.16	3896.7	2417.1	1171	1054.7	3143.6	1603.2	1918.4	1672.7	792.4	1112.6	3418.8	2167.2	4994.2	4199.3	2368.9	1290.8	1181.9	2653.7	1460.5	2094.1	1506.3	781.2	1426.9	3619.3	2321.5	5067.8	5.16	2930.6	2937.3	3857.7	1285.1	2473.6	4596.2	3075.5	2480	3717
13.72	2340	777.769	891.462	1364	1641.85	1125.77	3651.77	1054.31	940.538	1745.23	2700.23	1343.69	13.86	2845.5	2056.2	1082.7	735.2	1610.1	832.8	1833.9	819	734.5	766.4	1941.3	1622.7	3189.2	4239	2879.1	1247.3	856.9	2879.9	1217.4	2152.2	1554.2	795.8	1115.5	3637.8	2265.8	4155.8	13.42	1783.2	1859.6	2228.1	717.3	2119	3661.9	2543.2	2599.4	3557.6
18.95	2854.23	855.615	883.923	1494.15	2199.77	1141.38	3442.92	1037	1224	1744.31	2971.92	1512.77	19.09	2855.9	2555.4	1047	788.9	1907.8	1095.7	1925.3	1409.1	788	924.5	2262.1	1775.5	3713.7	3372.3	2986.9	1466.5	993.8	2765.2	1095.8	2047.3	1337	648	1177.2	3068.3	2103.7	3867.1	18.65	2219.5	1675.3	3104.8	800	2086.8	3422.5	2649.9	2112.6	3449.5
48.95	3338.46	1011	892.385	1265.77	2588.62	1174.85	3303.69	1059.31	1087.15	1657.15	3070.31	1365.54	49.09	3887.9	3245.4	1406.4	835.5	2588.1	1190.8	2363.2	1126.7	1165.1	1628	2798.5	1880.7	3878.9	3675.8	3099.3	1210.4	1035.4	2301.8	1124	1671.3	1275.6	658.5	1359.6	2940.8	2181.5	4033.9	48.65	2038.6	2032.3	3294.3	1067.8	2560	3705.3	2632.7	2011.9	3242
78.95	2890.38	1263.85	838	1283.62	2381.92	1486.54	3749.15	1124.38	926.538	1806.38	2335	1076.77	79.1	3396.5	2725.7	1340.3	772.3	2108	908.6	2191.7	1716.9	887.1	1414	3126.4	2056.6	4084.9	3451.5	2775.8	1298.1	774.8	2936.4	1183.3	1927.5	1505.2	914.5	1153.9	3348.4	1792.1	3303.6	78.65	1943.2	2623.9	3072.1	1154	2310.7	3385.1	2495.5	2085.7	3388.5
108.96	3564.15	999.769	920	1723.23	2282.69	1237.08	3644	1209.77	917.462	1535.23	2266.38	1242	109.1	3548.6	2507.1	1385.5	882	2185.3	1236.7	2173.6	1541.7	1114	1073.1	3226.2	1826.7	3798.4	3359.6	2748.7	791	656.3	2435.1	1549.4	1740.8	1495.1	1202.5	827.2	3861.1	1660.9	3432.6	108.661	2583.3	2518.2	2965	897	2689.2	3316.7	2427.8	2137.6	3421.1
138.96	3570.15	1164.69	830.923	1361.38	2202.92	1402.54	4155.08	1246.92	996.308	1391.85	2048.85	976	139.1	4086.2	3045.6	1471.2	1109.1	2273.3	1527.2	2920.1	1294.9	1112.2	1230.3	3699.9	2396.8	4516.8	3071.8	2607.3	915.9	745.7	2502.9	1123	1823.8	1257.4	913.6	1088.4	3595.9	1623.6	4039.9	138.661	2527.4	2845.4	2725.7	1084.3	2257.8	3848.1	2458.1	2087	2707
168.961	3527.62	1277.77	681.231	1564.85	2342.62	1345.77	3815.46	1155.62	907	1765.31	1969.08	943	169.101	3613.1	2454.4	1266.2	1140.1	2612.5	1507.3	2936.2	1245.4	1130	1296.7	4190.5	2078	3735.7	3762.5	2631.3	738	774.1	2453.9	1283.6	1452.7	1075.3	945.5	1219.7	3685.3	1538.5	3470.4	168.661	2398.6	2585.1	3486.8	1055.8	2475.5	3356.8	2062.5	2450.9	3024.9
198.961	3371.54	1280.23	744.077	1469.69	2615.23	1495.46	4474.23	1112.77	875.231	1518.23	2139	940.769	199.101	3518.2	2674.9	1439.4	1350.1	2893.8	1492.1	2958.8	1245.6	1355.4	1705	4434.4	2169.8	3511.8	3477.2	2586.8	783.1	670	2158.3	1120	1205.2	1268.7	1237.3	1124.4	3995.2	1412.5	2921.4	198.661	2172.7	2764.5	3129.6	1095.6	2307.3	3936.8	2647.6	2495.8	3516.4
228.961	3498.15	1478.54	648.308	1416.92	2503.92	1365.85	3827.92	1192	786	1647.31	2864.46	806.385	229.101	3755	2773.1	1340.1	1413.5	2582.8	1645.3	2869.8	1721.9	1358.2	1104.6	4257	2129.4	4038.2	3481.7	2283.2	813	749.2	2467	1429.9	1161.7	1206.2	1310.3	1100.1	2992.2	1243.5	3394.7	228.661	2482	3069	3693.1	1233.1	2604.9	3596.5	2216.7	2391.3	3871.4
258.961	3506.77	1247.69	768.385	1325.62	2332.62	1626.62	3639.38	1273.92	701.692	1479.46	2516.23	772.846	259.101	3981.1	2987.7	1630.4	1367.4	2446.9	1835.5	2877.8	1289.3	2168.8	1782.9	4395.5	2118	4045	3894.5	2099.6	843.7	828.5	2467.2	1223.5	969.9	1487.9	1071.4	1206.3	3604.2	1275.1	3314.8	258.661	2869.5	2977.6	3245	1455.9	2575	3768.7	2877.6	2291.4	3972.3
288.961	3775.92	1240.15	775.462	1513.38	2751.46	1378.23	4004.85	1167.54	638.769	1589.38	2177.92	711.077	289.101	3800.6	2920.8	1285.9	1601.7	2549.6	2089.3	2836	1289.4	2090.1	1617.1	4310.4	2026.7	3797.2	3954.3	2275.1	930.8	831.1	2309.9	983.6	1259.9	1370.4	1143.6	1124.2	2905.4	1328.9	4588.8	288.661	3310.9	2859.3	3542.5	1330	2885.3	3800.4	2908.8	2416.9	3535.5
318.961	3933.23	1529.15	741.615	1398	2700.15	1790.15	3993.08	1161.69	676	1648.46	2311.54	722.077	319.101	3901	3230	2114.1	1768.4	2531.8	1580.9	3020.8	1404.4	1800.5	1615.8	4139.5	1707.4	3664.1	4210.2	2104.8	1202.2	793	2827.9	1290.2	1054	1297.1	1087.1	1195.7	3119.8	1109.2	3830.3	318.671	3522.2	3625	3439.9	1279.6	2466.4	4044.8	2789.4	2287.5	3254.3
348.961	3829.54	1306.69	794.692	1196.31	2505.31	2162.77	3437.46	1030.23	587.385	1558	2052.15	831.308	349.111	4590.9	2938.2	1755.2	1643.9	2590.1	1853.2	3388.6	1572.4	2132.5	1665.8	5257.1	2199.3	3648.7	4490.4	2025.3	1373.5	688.9	2512.9	1274.2	865.9	1467.4	1127.3	1192.8	3687.8	1070.7	3902	348.672	4043	3078	2800.6	1370.3	2606.3	3294.4	2604.8	2268.4	2799.5
378.971	4075.62	1443.23	707.769	1470	1858.38	1829.54	3259.08	1189.08	612.692	1678.31	2233	747.462	379.111	4347.1	3197	1598.4	1446.8	2785.8	1281.8	2985	1570.7	2345.6	1634.8	3946.5	1720.9	3413.9	3301.1	2462.9	1922.5	897.9	2713.8	1146.3	768.9	1319.5	967	1130.8	3410.5	1314.2	4682.8	378.672	3996.3	4043.8	2711.4	1338.4	2559.6	3250.1	2423.7	2195.3	3083.6
408.972	4459.69	1587.92	951.769	1302.15	2281	2137	3479.77	1338.15	678.077	1575.54	2410.08	690.154	409.111	4327	3154.8	1710.1	1920.4	2942.1	1274.8	3389.4	1330.2	2757.4	1638.9	4823	1872.8	3527.3	3581.4	2179.5	2047.3	783.8	2597	1302.8	1182.5	1100.7	1160.3	1232	3400.5	1151.9	3427.6	408.672	3643.6	3991.2	2641.6	1305.9	2617.4	4043.7	2230.3	1992.3	3406.3
438.972	4112.77	1582.85	818.615	1155.77	2368	1892.69	2917.77	1314.46	651.308	1620	1985.15	586.615	439.112	4760.5	3406	1796.6	1686.7	2735	1557.5	2798.6	997.1	2494.3	1182	4749.9	2226.6	3452.4	3377.3	1764	1585.1	1019.6	2166.2	1335.2	917.9	1129.1	1347.8	1122.4	3149.1	1300.9	4240.8	438.672	4231.4	4212.7	2348	1470.1	3220.2	3640.4	2891.7	1917.2	2837.5
468.972	4386.15	1758.69	703.462	1678.54	2643.38	2078.69	3754.23	1057.69	618.385	1607	2099.08	646	469.112	5271.8	3761.4	1618.7	1714	2841.2	1427.1	2983.4	1525.7	2134.4	1461.2	4463	1628.4	3783.1	3245.5	2529.4	1447.1	942.7	2006.4	1142.4	857.6	1391.5	1060.9	1112.7	2820.7	1198.3	4339.1	468.672	4636.5	3960.7	2824	1592.9	2953.3	3714.7	2415	2056.1	2642.7
498.972	4707.23	1576	750.231	1378.23	2810.23	2261.15	3111.38	1083.23	538.846	1710.31	2794.54	674.077	499.112	5167.7	3442.6	2142.6	2013.9	2430.9	1166.4	3490.3	1475.6	1957.8	1709.2	5485.1	2202.9	3499.1	3473.7	2518.7	1601.4	1036.7	2867.8	1370.3	871	1015.5	1142.5	1097.7	3261.6	1235.2	4180.1	498.672	4767.8	4197.4	3206.6	1558.9	3403.3	3442	2796.2	2001.9	2662.6
528.972	4310.77	1841.46	963.308	1794.23	2729.31	2465.92	3212.69	1067.38	750.923	1431.77	2346.46	767.769	529.112	5616.2	3645.4	2453	2157.7	2938	1252.2	2331.6	1797.3	2832.4	1416.1	5451.1	1760.2	3281.8	3385.2	2224	1663.2	778.8	2329.9	1223.4	716.3	1357.9	1164.3	1184.5	2917.7	1466.2	3632	528.672	4897.1	3630.5	3194	1484.5	2683.2	3518.1	2379.7	2282.1	2728.9
558.972	4743.46	1632.23	994.615	2565.08	2808.77	2401.77	3251.15	1192.38	543.923	1673.08	2504.62	514.077	559.122	5289.5	4006	2335.6	1684.3	2213	1420.3	3294.7	1422.5	3663.9	1457.2	6278.4	1790.1	3598.3	3950.3	2151.2	1478	1015.5	2356.7	1375.9	982	1214.7	1148.9	1282.1	3570.7	1338.2	4277	558.672	5114	3895.5	3066.7	1679.8	3061.9	3435.3	2084.2	2341.9	2697.5
588.972	4809.54	1624.54	1074.69	2298	2676.77	2145.46	2613.38	1364.77	575.154	1886.69	1953.08	777.538	589.122	5280.6	4536	2749.4	2001.6	2368.2	1231.1	2955	1452.1	3363	1660.9	6495.3	1995.8	3577.3	3783.1	2631	1471.4	896.5	2293.2	1239.7	892.5	1211.7	1013.6	1024.9	2901.1	1214.4	3476.1	588.682	3883.3	4260.5	4166.4	1745.2	2826	3531.1	2209.3	2239.6	2592.5
618.982	4782.77	1456.31	1024.62	2410.92	2803.46	2487.38	3217.38	1114.69	531.462	1569.46	2190.46	837.462	619.122	5375.2	4475.8	2407.8	2386.6	3036.8	1520.8	3061	1525.3	3600.7	1624.6	5332.3	1994.4	4443.5	3682.7	2665.3	1288.2	767.8	2350.7	1062	787.5	1354	1063.9	887.2	2981.4	1618.6	4029.2	618.683	3641.7	4692.3	3900.1	1554.3	3004	3681.7	2444.3	2710.1	2445.8
648.983	4336.08	1801.69	1264.92	2944.08	3038.08	2261	3202.54	1181.31	448.462	1410.31	2402.54	790.538	649.122	5564.1	4048.2	2560.8	2282.7	2767.4	1809	3423	1446.7	3681.4	1914.1	6265.2	2222.4	4007.2	3514.8	2347.6	1494.3	808	2514.4	1044.2	1033.7	1796.9	947.5	1047.3	2769.5	1386.4	3588.7	648.683	3365.9	4090.3	4386	1732.3	2508	3468	2501.7	2240	2600.2
678.983	4402.15	1578.69	1224.23	2979.31	2958.15	2261.38	3149.23	1198.54	505.769	1474.23	2801.54	785.846	679.123	5413.4	4505	2987.4	2705.1	2504.4	2120.6	3105.9	1655	3746.2	1722.6	4902.1	1857	3993.8	3329.9	2882.8	1017.1	919.7	2217.1	1249.7	1000	1410.7	1000.4	939.5	2414.5	1268.7	3559.4	678.683	2948.1	4280.8	4236.3	1506.3	2740.7	2800	2097.2	2284.3	2732.9
708.983	4306.23	1695.85	1289.08	3408.08	2848.08	2574.92	3226.69	1097.08	635.769	1726.69	2671.46	768.846	709.123	5630.6	5372.5	2697.4	2376.4	3020.5	1902.5	3607.2	1925.5	4166.8	1690.7	5100	2011	3746.8	3387.5	2490.1	1529	1122.2	2385.3	1304.1	982	1173	1164	946.8	2883	1239.3	3153.4	708.683	3652.4	4406.2	4579.5	2088.7	2746.3	3019.3	1945.8	2301	3018.7
738.983	4615.92	1583.62	1134.92	3529.23	2887.46	2586.54	3251	1075.15	574	1733.08	2651	647.615	739.123	6113.8	5054.9	2982.8	2153.3	2609.7	1782	2862.6	2029	3957	1313.5	5020	1771.9	3856	3881.8	3031.3	1391.1	987.5	1965.1	1056.6	858.7	1467.8	1130.5	1084.1	2348.1	1180	3621	738.683	3269.5	4633.8	4411.7	2241	2839.9	3285.6	2065.1	2437.5	2951
768.983	4938	1532.15	1197.15	3858.62	2692.77	2829.54	2656.69	1064.69	581	1614.23	2525.62	696.385	769.123	5577.7	5373.6	2672.6	2672	3085.1	1795.6	3296.8	2092.4	3655.1	1829	5758	2289.7	4620.3	3772.4	2878.1	1415.9	870.1	2088.9	1308.4	887.3	1327.9	1243.4	1226.5	2711.6	1173.1	3621.5	768.683	3061.8	4853.6	4557.1	1924.7	2550.9	3098.7	1937	1633.6	2937.3
798.983	4740.23	1749.38	1263.46	3254.85	3014.62	2715.15	2891	952.154	621	1383	2489.08	641.769	799.133	5772.1	5161.1	2854.8	2070.9	2652.7	1847.6	3463.6	2073	4397.8	1671.3	5844.2	2541.4	3703.5	3039.6	3060.6	1353	906.2	2631.2	1146.1	819.5	1299.4	1352.5	1087.4	2654.7	1158.8	3401.9	798.683	2693.8	4346.2	4771.5	1876.7	3127.8	3240	2432.6	1955.1	2555.6
828.983	4461.77	1903.77	1162.38	3196.23	2923.69	3001	3132.54	1175.31	653.308	1676.77	2249.77	839.769	829.133	5357.4	4855.9	2845	1829.3	2711.4	1734.4	3337.3	1897.8	4869.4	1649.7	5634.8	2738.8	3544.5	3042	2766.4	1820.9	969.1	1827.6	1248.6	815.2	1335.6	903.6	936.2	2533.6	1224.4	3579.4	828.693	3300.3	3883.8	4615.5	2084.4	2587.1	3575.2	2184.4	1776.1	2700.7
858.993	5707.69	1811.77	1169	3255.38	2715.38	2618.46	2805.46	1382.62	586.231	1374.92	2824.69	672.385	859.133	6397.5	4729	2936.2	1994.4	3320.1	2099.7	3635	1986.9	5150.1	1833.2	6957.6	2810.6	3055.5	3466.3	2702.6	1354.2	952.8	1925.5	1076.7	875.1	1383.2	1192.4	1058.9	2416.9	1687.5	3758.4	858.694	3355.1	4095	4444	1960.1	2923.3	2765.7	2202.4	2271.3	3576.9
888.994	5303.85	2093.62	1254.31	3232.15	3092.92	2548.46	3051.54	1102.31	676.769	1394.15	2431.69	660.692	889.133	6297.3	4454.2	3246.1	1772.9	3174.6	2312.6	4060.3	2064.6	5301.5	2088.1	6638.5	2590.8	3620.1	3379	2838.6	1130.9	880	2397.2	1327.1	720.2	1445.2	1200.8	896.4	2499.7	1221.8	3039.5	888.694	3911	4365	4554.3	2193.1	2368.1	2958.9	2131.8	2112.5	3144.4
[truncated: 22 more columns]

## Sheet: WT3
REORGANIZED DATA FROM 3 FIELDS	CELL FRAP	CONTROL	CELL FRAP	CONTROL	CELL FRAP	CONTROL	CELL FRAP	CONTROL	CELL FRAP	CONTROL	CELL FRAP	CONTROL	CELL FRAP	CONTROL	CELL FRAP	CONTROL	CELL FRAP	CONTROL	CELL FRAP	CONTROL	CELL FRAP	CONTROL	CELL FRAP	CONTROL	CELL FRAP	CONTROL	CELL FRAP	CONTROL	CELL FRAP	CONTROL	CELL FRAP	CONTROL	CELL FRAP	CONTROL	CELL FRAP	CONTROL	CELL FRAP	CONTROL	CELL FRAP	CONTROL	CELL FRAP	CONTROL	CELL FRAP	CONTROL	CELL FRAP	CONTROL	CELL FRAP	CONTROL	CELL FRAP
Axis [s] - TIME	ROI1 []	ROI2 []	ROI1 []	ROI11 []	ROI2 []	ROI12 []	ROI3 []	ROI13 []	ROI4 []	ROI14 []	ROI5 []	ROI15 []	ROI6 []	ROI16 []	ROI7 []	ROI17 []	ROI8 []	ROI18 []	ROI9 []	ROI19 []	ROI10 []	ROI20 []	ROI1 []	ROI13 []	ROI2 []	ROI14 []	ROI3 []	ROI15 []	ROI4 []	ROI16 []	ROI5 []	ROI17 []	ROI6 []	ROI18 []	ROI7 []	ROI19 []	ROI8 []	ROI20 []	ROI9 []	ROI21 []	ROI10 []	ROI22 []	ROI11 []	ROI23 []	ROI12 []	ROI24 []
0	1813.21	1738.86	2281.5	2258.5	14413.8	14714.4	12215	12715.9	9263.5	9553.64	4905.5	5092.93	4627.57	4581.86	3308.36	3157.5	2630.07	2269	2187.93	1959.21	12060.9	12538	17019.9	15754.1	5393.93	5337.21	4358	4155	12013.9	12341.4	14283.1	15572.8	10511	10854.2	6012	6409.14	11008.7	10974.1	12155.6	11128.6	5079.43	3872.79	3735.36	4162.14	2361.86	1976.29
5.17	1786	1912	2225.86	2296.36	15457.1	14352.6	11140.3	11532.1	9681	10026.6	5582.57	5335.07	4580.57	4432.93	2843.79	3147.43	2579.29	2904.36	2211.14	2128.86	13045.5	11747.6	14351.6	16388.4	4508.93	4944.07	4098	4040.14	12059.6	12150	15785.4	15433.3	10307.2	10426.7	6713.14	6263.71	9238.21	10088.9	10747.4	11773.4	3558.5	3842.93	3327.79	3334.71	2011.21	2230.93
13.91	983.357	1901.29	1702.14	1862.36	6783.07	13333.1	7185.21	12016.6	7459.29	8316.79	3643.21	4229.14	2759.93	3897.29	2646.5	3056.14	1272	2314.71	1677.57	2091.29	8751	11973.7	10586.7	16216.1	4687.43	4751	3248.5	4502.64	9940	10958.3	9524.57	15304.3	6968.43	11267.4	5284.57	6441.86	7155.21	10954.1	7392.79	9243.64	3313.43	3615.43	3068.43	3658.79	1061.71	1832.93
19.14	1161.86	1816.21	1854.21	1874.29	9014.86	11290	9295	11045.1	7024	10130.4	3188.29	4971.29	3387.43	4240.86	2658.93	2960	1661.64	2694.86	1745.64	2004.93	10167.9	10645.5	11771.6	14522.1	4558.29	5641.64	3419.43	4112.71	9336.29	10577.5	10710.4	14994.2	7959.57	10031.8	4709.79	6204.93	7033.71	10308.7	8328.29	8608.71	3115.29	3624.71	2705.43	3595.36	1816.36	1865.93
49.141	1507.14	1586.71	2187.64	1457.86	11057.5	12950.7	9848.21	9688.86	7320.57	7826.07	3980.29	4651.79	4060.36	4694.07	2906.07	2705.43	2070.5	1997.43	2434.5	1608	10534.9	11258.5	14603.6	15861.4	5065.5	4894.5	4479.86	3518.07	9804	9191.36	12739.7	14333.5	9057.21	9444.07	4997.79	5777.5	8148.43	10041.1	9987.36	9760.57	3589.79	4237.86	3754.07	3452.57	2096.71	1853.64
79.141	1598.43	1747.21	2100.64	1493.14	11419.5	11968.6	10690.4	9776.07	7544.5	8545.14	5134.79	4616.86	4898.71	4350.79	3796	3427.79	1878.36	2176.21	2111.64	1718.86	11771.4	10762.4	14657	15854.2	4885.43	4743.86	3604	4522	10155.9	9826.64	14815.5	14765.5	9515	8993.43	4353.64	5130.64	8527.07	11082.9	9924.5	10024.1	3827.86	3970	3625.86	3188.5	1764.14	1929.43
109.141	1591.43	1476.71	1705.43	2015.79	10930.9	12468.9	10116.1	10229.2	7596.57	8204.71	4234.71	4479.79	4205.57	4366.14	3034.36	2550.79	1647.71	2138.14	2222.64	1832	10354.1	10854	14671.7	15789.5	4387.86	6308	4166.5	3750.86	9365.71	9638.86	15060.4	15158.2	11347.9	9779	5584.14	5307.07	9407.86	10117.9	10221.3	9902.07	3745.21	3790.43	3303.93	3159.93	1776.36	1623.86
139.151	1223.86	1392.21	2172.14	1990	11419.8	12710.1	10913.8	10242.9	6411.36	8944.86	4054.93	4077.14	4382.64	4751.43	3060.79	2524.71	2030.86	2037.14	1876.36	1549	10193.6	11677.7	15191.6	15517.8	5457.43	5631.5	3820.29	3749	10079.8	8138.21	15086.1	15708	11559	9441.86	6044	5656.64	9506.86	9895	9828.14	9783.93	4246.64	3369.79	2825.21	3086.93	1471.86	1422.36
169.151	1653.71	1448.14	2504	2335.64	11237.6	10604.6	10109.4	10705	6795.36	8996.57	4430.43	4099.43	5335.71	4150.64	2691.07	2384.71	1779.07	2095.21	2250.36	1497	11513.6	10821.7	15229.4	15801.9	7894.93	6480.79	4339.93	4158.5	10469.6	8480.5	15006.6	11938.4	11920.3	9374.57	5972.21	5270.86	8799.07	9451.14	8843.21	9271.93	4002.64	3643.5	3431.5	3098.93	1512.43	1570.5
199.151	1487.07	1608.57	2282.14	2319.93	11336.2	11738.6	9227.43	10315.8	8566.36	8755.43	4029.5	4194	4079.5	4977.57	2373.14	2861.43	1392.79	1997.57	1812.57	1996.21	10157.2	11442.8	15513.1	14614.4	7602.14	6449.21	4155.43	3949	13207.9	9117.5	16094.3	13203.8	11765.1	7017.57	6896.43	5337.64	9300.07	10685.4	9218.14	8664.43	4030.43	4189.36	3408.71	3718.14	1770.29	1698
229.151	1581.5	1412.43	2026.93	2112.29	11074	13395.6	10048.7	10619.2	8460.93	8479.86	4611.5	4134.93	4064.07	4698.29	2902.43	3137.36	1832.36	1849.29	1968.29	1817.71	10693.6	11498.7	15669.2	13372.1	6348.93	6378.64	3967.36	4370.64	12621.6	7846.86	15829.1	13310.8	12179.9	6463.36	5645.5	4914.43	9931.21	9268.71	8489.14	8718.79	3772.79	3588.43	3571.21	2984.14	1578.64	1156.57
259.151	1788.29	1620.07	2458.14	1889.64	12024	12925.6	9361.93	10969.9	8844.64	8343.93	4503.93	4227.93	4290.86	5060	2664.21	2446.93	1961.79	1701.07	1998.07	2377.71	10888.6	10050.8	17027.1	15730.8	6599	6877.64	3807.43	3843.21	10387.5	7847.07	15025.3	12287.7	11743.6	6197.43	5277.29	4836.86	9839.57	8883.71	9450.43	9766.43	3594.86	4697.36	3734.93	3031.86	1242.14	1197.64
289.151	1606.86	1481.57	2305	1780.43	13872.4	12579	10587.4	11683.7	9070.64	6985.57	4719.86	3687.29	4631.57	4132.71	2437.64	2888.07	1719	1918.07	2012.93	1906.86	10055.9	10089.2	15848.9	14069.7	6195.07	6064.5	4270.14	3813.29	10337.4	8955.5	14970.9	13298.1	12792.3	5482	5576.93	4904.71	9836.21	9730.71	8192.64	9829.36	3840.64	4081.5	3700.21	2698.43	1589	1527.5
319.152	1738.14	1333.64	2588	1949.36	11850.6	14710.8	8380.64	10359.1	9664.71	7444.86	3818.14	3795.64	4086.43	4636	2174.79	2310.43	1478.64	2264.43	2076.86	1605.79	10623.1	10299	15688.7	13076.3	6069.79	6047.71	3601.21	3819.79	10962.9	8427.57	15675.1	12802.3	11868.6	6069.36	5583.86	4879.64	8880.79	9377.21	8752.5	10248.5	3405.79	4598.86	3794.07	2869.71	1633.07	1386.93
349.152	1864	1510.71	2753	1520.36	11058.4	14538.1	9752.57	9833.21	9155.07	7858.79	4435.5	3820.36	4553.29	4667.64	2490.79	2709.14	1738.29	1704.57	1808.57	1819.07	10973.9	10649.4	16703.2	14211.9	6291.79	6185.36	3666.07	3445.57	9848.29	8455.43	15868.9	11765.1	11209.2	6723	6190.86	4577.86	8493.93	9926.14	8566.14	8746.57	3060.21	3830.71	3403.36	2764.57	1452.14	1076.57
379.162	2142.79	1744.57	3371.21	1669.36	10710.1	11922.1	9592.93	9351.93	9072.14	8268.29	3982.5	4009.36	4541.07	5273.43	3035.64	2589.5	1850.29	2149.71	1859.21	1743.36	10254.2	11431.8	16143.6	13496.1	5563.36	5984.79	3087.79	3045.14	12197.7	8802.36	14655.1	13222.4	11405.6	7426.64	5893.79	4626.5	8490.93	10077.7	9308.14	9503.07	3495.14	2966	3234.21	2527.36	1621.57	1049.21
409.162	2201.43	1728.21	2389.29	2095.93	10821.8	12176.7	10100.1	8637.57	8042	7853.36	4294.57	3864.21	4459	4810.64	2129.93	2557.36	1696.79	2463.21	2049.57	1766.43	12368.1	10371.1	16300.4	12495.1	5787.36	5265.43	3023.71	3600.79	12749.6	8527.64	15771.6	12532.1	10687.4	6410.43	6928.07	5225	8823.57	8498.5	8961.86	8997.36	3254.29	3466.79	3762.64	3178.71	1720	1242.79
439.162	2105.21	1577.29	3043.43	2001.93	11068.6	13482.9	9567.5	8581.36	8063.71	8303.21	4247.71	3999.71	4626.57	5061.36	2307.43	2927	1372.07	1800.21	1856.86	1616.07	12156.9	9322.07	15076.1	12564.1	5462.86	5799.64	3791.43	3740.29	12091.5	8404.07	16688.6	13126.6	11489.9	7249.71	5977.21	4321	8210.93	8854.29	8359.14	8141.29	3326.93	3669.5	4220.43	2924.64	1914.5	984.429
469.162	2253.29	1758.93	2991.71	1972.07	11829.2	11916.6	9691.86	8438.07	8729.21	8602.36	3972.36	3365.36	3850	4596.57	2320	2351.79	1449.21	2102.93	2509.36	1368.29	12511	9743.21	16181.1	12275.1	5937.86	5705.57	3450.57	3519.36	12547	9512.21	16103.9	11816.7	11403.3	6761.57	5995.64	4793.79	7733.86	8705.07	7486.93	8101.14	3987.57	3549.71	4019.79	2780.79	2118.79	1051.07
499.162	2008.86	1633.86	3272.21	1880.93	12464.1	13217.2	9817	8807.07	8996.57	9213.29	3739.64	3475.79	4589.57	4967.79	2340.86	2283.29	1879.43	1758.79	2340.14	1305.93	11262.2	9283.57	17867.1	12282.9	6120.57	5432.07	3122	3693.64	12256.9	9884.93	16494.2	11862.7	10723.1	7977.29	6643.64	5340.64	7455.14	7809	7482.21	7969.21	3551.93	3524.86	3148.43	2939.79	1816.29	871.643
529.162	2027.36	1775.07	3348.43	1915.57	12536.7	11452.9	10196.4	8405.5	9188.5	8532.5	3992.5	3487.86	4350	4381.93	2843.57	2352.07	1637.29	1977	1845.93	1733.79	12666.6	9437.07	17502.8	12480.1	5757.79	6351.57	2909.5	3055.86	12718.1	9721.5	14590.3	11199	11290.9	9415.29	7498.71	5053.43	7083.5	7257.14	7851.36	6916	4000.21	3985.29	3043.14	3029.86	2799.64	1623
559.163	2171.71	1593.21	3775.07	1684.14	12575.7	11021.4	9837.07	7790.43	7800.36	7840	4043.21	3111.93	4623.64	4338	2467.86	1967.43	1794.07	2111.57	2120.36	1830.07	11256.1	10585	16095.8	13554.2	5776.79	6117.29	3045.86	3873.14	12825.1	9176.07	13429.6	11743.7	11074.4	8956.57	7097.43	4585.29	7976.14	6947.07	8190.86	5688.93	3258.07	3408.86	3290.5	2443.14	2495.93	1230
589.163	2057.14	1641.14	3298.71	1583.36	12077.8	12694.9	9273.5	7545.93	8494	6974.93	3500.07	3597.43	4730.43	3992.29	2602.86	2353.64	1942	1838	2632.71	1739.36	11949.1	9164.21	17591.6	11801.6	6109.07	5481.29	3462.5	3816.43	12428.2	9863.07	16187.3	12941.8	9938.57	9230.14	6880.36	4588.57	7240.5	7330.79	7050.86	7092.64	3293.43	3370.57	3586.07	2475.86	2676.79	1503.5
619.173	1936.07	1383.79	3294.43	1555.57	13224.3	10466.1	9636.86	8183.21	7282.43	6843.64	4710.71	3535.79	4861	4116.5	3143.79	2378.14	1957.86	1890.64	2318.86	2035.86	11916.8	9611.64	16639	11879.7	6061.36	5715.5	4150.07	3629.79	12676.1	8916	16156.9	11931.2	10639.6	9922.57	5720.71	4924.29	7227.86	7204.93	6846.14	6157.64	3645.5	3333.43	3136.14	2918.79	2195.5	1122.93
649.173	2149.86	1433.43	2896.21	1793.71	13943.9	10365.9	10293.4	9040.14	6934.93	7265.57	4766	3253.14	5086.07	4166.64	2882.86	2566.86	1886.5	1652.29	2232.79	1723.57	12482.9	9302.86	17613.3	12268	6938.43	5302.07	3285.36	3806.43	12833.7	9096	14226.3	11458.6	10078.4	10127	7130.64	5510.86	7148.64	7457.86	6397.14	6874.5	3039.14	2850.79	3510.93	2809.86	3064.36	1104.5
679.173	2162.07	1769.57	3522.71	1286.5	12870.7	9729.36	9704.21	9316.79	7361.93	6304.86	4578.14	3195.86	5281.86	3581.71	2658.36	2140.43	2102.36	1733.86	2088.79	1403.29	11824.2	9971.71	17493.8	11703.9	6504.86	6084.93	3416.5	3204.21	13975.8	9173.86	15983.1	11987.9	11269.4	9559.93	7481.86	5319.71	7496.71	6953.79	6960.64	6120.43	3594.93	3238.79	3264.5	2661	2094.64	954.143
709.173	2200.71	1405.5	3592.64	1340.43	14509	9341	9950	7552.71	7399	7050.5	4533.57	3535	5215.57	3460.79	2825.14	2245	2588.43	1820.5	2580.36	1792.71	11661.6	8367.86	17334.8	12250.8	7176.57	5330.93	3917.29	2801.36	13940.6	9091.21	16031.5	12064.6	9666	8633.79	7646.64	5067.29	8204.29	7852.43	6716.86	6620	3472.14	2879.93	3232.79	2275.14	2303.36	1086.14
739.173	2465.93	1722.71	4319.07	1392.21	13228.4	8836	9921.07	8980.79	6552.43	7291.14	4392.5	3301	5476.14	3443.36	2397.86	2312.07	3193.64	1758.36	2445.07	1978.93	11226	8454.86	18130.9	11546.3	6292.43	6089.14	4063.36	3059.57	12765.6	9585.14	15336.8	11428.7	10139.8	8822.57	7776.36	5151.21	7303.43	6956.79	7012.93	7653.71	3227.71	3296.57	2897.86	2423.71	2102.5	955.286
769.173	2202.29	1324.5	3490.14	1373.93	13221.9	10139.4	10098.1	9238.71	6738.93	6846	4084.57	3744.36	4636.07	3887.5	2520.93	1998.93	2823.43	1855.57	2515.71	1616.86	12434.1	8282.36	16717.1	10879.6	6719.29	4959.07	4530.5	3169.86	11767.4	9295.71	16060.4	12562.9	11067.4	8931.86	7980.86	4530.36	7955.93	7617.14	6791.36	5745	3254.79	3129.64	3546.36	2051.5	2223.36	1002.86
799.174	2235.14	1592.07	4421.14	1261.86	13170.9	11071.1	10123.9	8564.57	7867.79	9015.93	4586.14	3746	4867.5	4181.57	2491.93	2932.79	2963	1860.86	2250.93	1286.79	12314.4	8528.79	15715.4	11383.6	6693.79	4777.43	3772.14	2761.14	11426	9023.29	16061.8	10992.6	10673	9203.5	7999.71	4624.36	7633.29	6670.86	6254.36	6204.43	3648.07	3126.21	2291.64	2211.07	1823.57	988.929
829.174	2187.79	1567.36	4266.29	1705.5	12321.8	10491.1	10735.4	8069.36	7575.86	8585.07	4772.86	3549.86	4769.21	3573.29	2346.21	2082.36	2606.29	1740.93	2620.5	1485.71	11077.1	9200	16638.6	11627.1	6184.79	4759.64	3889.57	2796.71	10973.4	9284.21	15887.5	9815.29	11842.7	9720.29	9166.07	4833.29	7332.79	7980.93	7603.57	6193.07	3068.07	2970.71	3347.07	2559	2298.79	944.429
859.184	2156.14	1622.57	4587.5	1438.21	11379.8	12366.6	10674.4	7895.86	6385	8322.64	4264.14	3766.5	4430.36	3717.57	2529.64	2374.93	3265.43	2216.64	2803.5	1413.93	11643	7855.86	13750.5	12410.2	6271.79	5562.21	3589.93	2425.86	11475.1	7993.86	17287.6	11267	13015.8	9168	8617.93	4862.71	7427.07	7165.43	6126.43	6395.14	3403.5	3145	3711.57	2628.14	1993.86	793.214
889.184	2152.36	1427.93	3824.21	1281.29	12082.9	11321.5	10748.1	9149	7695.07	7717.14	4785.71	3881.71	4740.14	3140.21	2813.14	2608.36	2457.79	1414.43	2800.5	1385.64	10846.7	8394.36	14128.6	11196.4	6591.36	5649.57	3752	2951.93	11413.8	8269.71	15364.5	10413.4	11340.4	8744	7302.57	4819.86	7320.79	7484.71	6341.29	6452	3356.07	2851.43	3016.5	2418.14	2050.57	675.643
	0 = mean of signal before frap
Ploted data	Calculation of total # cells in all fields
	1	2	3	4	5	6	7	8	9	10	11	12	13	14	15	16	17	18	19	20	21	22	23	24	25	26	27	28	29	30	31	32	33	34	35	36
0	98.5855	98.9572	102.766	96.3187	96.7533	100.576	102.145	97.5767	100.696	107.607	103.38	97.6011	96.3192	103.183	98.2939	96.9762	97.8257	100.413	96.1252	100.005	111.952	94.2147	103.942	#DIV/0!	#DIV/0!	#DIV/0!	#DIV/0!	#DIV/0!	#DIV/0!	#DIV/0!	#DIV/0!	#DIV/0!	#DIV/0!	#DIV/0!
13.91	51.7206	91.3972	50.874	59.7942	89.6895	86.1455	70.8167	86.5961	54.9528	80.2172	73.0851	65.285	98.6619	72.1465	90.7076	62.2347	61.8458	82.0349	65.3197	79.977	91.6469	83.8647	57.9245	#DIV/0!	#DIV/0!	#DIV/0!	#DIV/0!	#DIV/0!	#DIV/0!	#DIV/0!	#DIV/0!	#DIV/0!	#DIV/0!	#DIV/0!
19.14	63.9714	98.9291	79.8482	84.1552	69.3357	64.134	79.876	89.8287	61.6598	87.0676	95.5132	81.06	80.7971	83.1429	88.2655	71.4304	79.3435	75.9039	68.2308	96.7425	85.9457	75.2478	97.3433
49.141	94.9851	150.059	85.3814	101.645	93.5408	85.5647	86.4997	107.416	103.658	151.399	93.5725	92.0701	103.494	127.338	106.665	88.8807	95.9037	86.5043	81.1504	102.323	84.7076	108.733	113.113
79.141	91.4844	140.686	95.4124	109.352	88.2899	111.218	112.594	110.742	86.3131	122.852	109.375	92.4486	102.984	79.6992	103.35	100.339	105.799	84.8557	76.9388	99.0067	96.4196	113.717	91.4334
109.141	107.768	84.6037	87.6648	98.8939	92.5879	94.5294	96.3224	118.958	77.0629	121.323	95.3941	92.9207	69.5602	111.081	97.1662	99.3544	116.044	105.221	92.982	103.224	98.8071	104.557	109.391
139.151	87.9072	109.153	89.8483	106.549	71.6765	99.4552	92.2384	121.233	99.6914	121.133	87.2908	97.8983	96.909	101.901	123.857	96.0411	122.423	106.848	96.0774	100.452	126.021	91.5219	103.48
169.151	114.196	107.208	105.968	94.4365	75.5327	108.074	128.552	112.847	84.9112	150.324	106.394	96.3766	121.821	104.363	123.455	125.701	127.156	113.306	93.1006	95.3762	109.857	110.732	96.3024
199.151	92.4467	98.3713	96.5718	89.4496	97.8405	96.0777	81.9576	82.9356	69.724	90.8004	88.7652	106.15	117.877	105.227	144.863	121.891	167.653	129.204	87.0351	106.391	96.2064	91.6779	104.257
229.151	111.97	95.959	82.6691	94.6277	99.7768	111.526	86.5012	92.5119	99.0846	108.284	92.9986	117.178	99.5342	90.7729	160.85	118.92	188.446	114.876	107.148	97.3661	105.138	119.673	136.493
259.151	110.383	130.085	93.0244	85.3423	106.001	106.528	84.7995	108.88	115.326	84.0333	108.336	108.24	95.9486	99.0689	132.374	122.279	189.491	109.106	110.76	96.7644	76.5294	123.189	103.716
289.151	108.456	129.463	110.282	90.6164	129.848	128.004	112.071	84.4038	89.6213	105.563	99.6701	112.646	102.153	111.981	115.43	112.579	233.351	113.705	101.084	83.3487	94.0988	137.125	104.026
319.152	130.33	132.762	80.557	80.9009	129.817	100.593	88.1456	94.1291	65.2987	129.336	103.147	119.978	100.365	94.2779	130.083	122.44	195.55	114.432	94.706	85.4027	74.0572	132.211	117.747
349.152	123.385	181.076	76.0648	99.1799	116.495	116.102	97.55	91.94	101.978	99.4228	103.046	117.53	101.721	106.4	116.473	134.881	166.729	135.235	85.5713	97.9372	79.8863	123.106	134.886
379.162	122.826	201.947	89.8346	102.577	109.722	99.3301	86.1123	117.229	86.0712	106.646	89.6991	119.616	92.9583	101.4	138.573	110.836	153.576	127.392	84.2545	97.9488	117.84	127.968	154.551
409.162	127.382	113.997	88.8728	116.933	102.402	111.137	92.6903	83.2863	68.885	116.029	119.256	130.454	109.912	83.9737	149.51	125.85	166.719	132.595	103.825	99.6054	93.8704	118.37	138.399
439.162	133.471	152.025	82.0932	111.492	97.1156	106.2	91.4097	78.8325	76.2171	114.899	130.41	119.993	94.193	101.367	143.877	127.136	158.488	138.329	92.7339	102.676	90.6644	144.306	194.478
469.162	128.106	151.704	99.2663	114.859	101.475	118.037	83.7581	98.6484	68.9141	183.394	128.407	131.82	104.071	98.0455	131.904	136.28	168.648	125.071	88.8431	92.4182	112.335	144.556	201.583
499.162	122.952	173.968	94.3023	111.467	97.6478	107.591	92.3867	102.521	106.859	179.194	121.313	145.463	112.675	84.5236	123.996	139.042	134.42	124.398	95.4686	93.889	100.768	107.097	208.375
529.162	114.213	174.801	109.463	121.307	107.688	114.469	99.2714	120.896	82.8167	106.468	134.221	140.246	90.6514	95.2106	130.825	130.282	119.921	148.389	97.6073	113.525	100.375	100.438	172.498
559.163	136.31	224.154	114.103	126.271	99.4944	129.926	106.585	125.436	84.9638	115.862	106.34	118.751	94.4338	78.6405	139.766	114.356	123.646	154.787	114.813	143.979	95.5766	134.683	202.921
589.163	125.348	208.337	95.1392	122.894	121.779	97.2937	118.489	110.588	105.658	151.361	130.388	149.061	111.453	90.7262	126.008	125.078	107.675	149.946	98.7684	99.4109	97.7113	144.842	178.037
619.173	139.911	211.783	126.354	117.764	106.412	133.23	118.086	132.195	103.555	113.901	123.983	140.062	106.051	114.334	142.172	135.417	107.226	116.173	100.318	111.181	109.362	107.447	195.516
649.173	149.98	161.465	134.516	113.864	95.4492	146.504	122.066	112.311	114.175	129.544	134.183	143.571	130.863	86.3108	141.092	124.154	99.5197	129.393	95.8538	93.0561	106.607	124.95	277.443
679.173	122.181	273.822	132.287	104.158	116.766	143.252	147.467	124.197	121.253	148.85	118.578	149.469	106.901	106.625	152.344	133.328	117.881	140.644	107.808	113.728	110.996	122.679	219.531
709.173	156.579	268.022	155.326	131.741	104.943	128.248	150.705	125.842	142.182	143.936	139.362	141.499	134.621	139.835	153.342	132.88	111.956	150.902	104.481	101.463	120.564	142.092	212.068
739.173	143.142	310.23	149.71	110.47	89.8683	133.066	159.035	103.71	181.627	123.555	132.776	157.028	103.338	132.808	133.182	134.195	114.93	150.962	104.983	91.6278	97.9112	119.563	220.091
769.173	166.273	254.027	130.402	109.302	98.436	109.086	119.256	126.114	152.16	155.593	150.128	153.655	135.495	142.924	126.59	127.839	123.909	176.164	104.448	118.213	103.999	172.867	221.702
799.174	140.392	350.368	118.966	118.206	87.2654	122.428	116.404	84.968	159.228	174.926	144.386	138.052	140.113	136.615	126.628	146.115	115.967	172.991	114.427	100.805	116.693	103.644	184.399
829.174	139.584	250.149	117.449	133.039	88.2445	134.452	133.469	112.671	149.707	176.38	120.403	143.102	129.942	139.076	118.194	161.865	121.835	189.645	91.8789	122.775	103.277	130.796	243.405
859.184	132.884	318.972	92.02	135.19	76.7184	113.212	119.173	106.514	147.314	198.277	148.208	110.8	112.757	147.986	143.549	153.435	141.97	177.225	103.651	95.7982	108.219	141.224	251.364
889.184	150.733	298.467	106.726	117.479	99.714	123.289	150.95	107.851	173.765	202.108	129.214	126.189	116.67	127.103	138.019	147.546	129.694	151.51	97.8098	98.284	117.698	124.744	303.499
Channel,001 - GFP	RAW DATA imported LAS AF software		Channel,001																					Channel,001
Axis [s]	ROI1 []	ROI2 []	Axis [s]	ROI1 []	ROI2 []	ROI3 []	ROI4 []	ROI5 []	ROI6 []	ROI7 []	ROI8 []	ROI9 []	ROI10 []	ROI11 []	ROI12 []	ROI13 []	ROI14 []	ROI15 []	ROI16 []	ROI17 []	ROI18 []	ROI19 []	ROI20 []	Axis [s]	ROI1 []	ROI2 []	ROI3 []	ROI4 []	ROI5 []	ROI6 []	ROI7 []	ROI8 []	ROI9 []	ROI10 []	ROI11 []	ROI12 []	ROI13 []	ROI14 []	ROI15 []	ROI16 []	ROI17 []	ROI18 []	ROI19 []	ROI20 []	ROI21 []	ROI22 []	ROI23 []	ROI24 []
0	1813.21	1738.86	0	2281.5	14413.8	12215	9263.5	4905.5	4627.57	3308.36	2630.07	2187.93	12060.9	2258.5	14714.4	12715.9	9553.64	5092.93	4581.86	3157.5	2269	1959.21	12538	0	17019.9	5393.93	4358	12013.9	14283.1	10511	6012	11008.7	12155.6	5079.43	3735.36	2361.86	15754.1	5337.21	4155	12341.4	15572.8	10854.2	6409.14	10974.1	11128.6	3872.79	4162.14	1976.29
5.17	1786	1912	5.16	2225.86	15457.1	11140.3	9681	5582.57	4580.57	2843.79	2579.29	2211.14	13045.5	2296.36	14352.6	11532.1	10026.6	5335.07	4432.93	3147.43	2904.36	2128.86	11747.6	5.16	14351.6	4508.93	4098	12059.6	15785.4	10307.2	6713.14	9238.21	10747.4	3558.5	3327.79	2011.21	16388.4	4944.07	4040.14	12150	15433.3	10426.7	6263.71	10088.9	11773.4	3842.93	3334.71	2230.93
13.91	983.357	1901.29	15.12	1702.14	6783.07	7185.21	7459.29	3643.21	2759.93	2646.5	1272	1677.57	8751	1862.36	13333.1	12016.6	8316.79	4229.14	3897.29	3056.14	2314.71	2091.29	11973.7	15.4	10586.7	4687.43	3248.5	9940	9524.57	6968.43	5284.57	7155.21	7392.79	3313.43	3068.43	1061.71	16216.1	4751	4502.64	10958.3	15304.3	11267.4	6441.86	10954.1	9243.64	3615.43	3658.79	1832.93
19.14	1161.86	1816.21	20.38	1854.21	9014.86	9295	7024	3188.29	3387.43	2658.93	1661.64	1745.64	10167.9	1874.29	11290	11045.1	10130.4	4971.29	4240.86	2960	2694.86	2004.93	10645.5	20.63	11771.6	4558.29	3419.43	9336.29	10710.4	7959.57	4709.79	7033.71	8328.29	3115.29	2705.43	1816.36	14522.1	5641.64	4112.71	10577.5	14994.2	10031.8	6204.93	10308.7	8608.71	3624.71	3595.36	1865.93
49.141	1507.14	1586.71	50.38	2187.64	11057.5	9848.21	7320.57	3980.29	4060.36	2906.07	2070.5	2434.5	10534.9	1457.86	12950.7	9688.86	7826.07	4651.79	4694.07	2705.43	1997.43	1608	11258.5	50.631	14603.6	5065.5	4479.86	9804	12739.7	9057.21	4997.79	8148.43	9987.36	3589.79	3754.07	2096.71	15861.4	4894.5	3518.07	9191.36	14333.5	9444.07	5777.5	10041.1	9760.57	4237.86	3452.57	1853.64
79.141	1598.43	1747.21	80.38	2100.64	11419.5	10690.4	7544.5	5134.79	4898.71	3796	1878.36	2111.64	11771.4	1493.14	11968.6	9776.07	8545.14	4616.86	4350.79	3427.79	2176.21	1718.86	10762.4	80.641	14657	4885.43	3604	10155.9	14815.5	9515	4353.64	8527.07	9924.5	3827.86	3625.86	1764.14	15854.2	4743.86	4522	9826.64	14765.5	8993.43	5130.64	11082.9	10024.1	3970	3188.5	1929.43
109.141	1591.43	1476.71	110.38	1705.43	10930.9	10116.1	7596.57	4234.71	4205.57	3034.36	1647.71	2222.64	10354.1	2015.79	12468.9	10229.2	8204.71	4479.79	4366.14	2550.79	2138.14	1832	10854	110.641	14671.7	4387.86	4166.5	9365.71	15060.4	11347.9	5584.14	9407.86	10221.3	3745.21	3303.93	1776.36	15789.5	6308	3750.86	9638.86	15158.2	9779	5307.07	10117.9	9902.07	3790.43	3159.93	1623.86
139.151	1223.86	1392.21	140.38	2172.14	11419.8	10913.8	6411.36	4054.93	4382.64	3060.79	2030.86	1876.36	10193.6	1990	12710.1	10242.9	8944.86	4077.14	4751.43	2524.71	2037.14	1549	11677.7	140.641	15191.6	5457.43	3820.29	10079.8	15086.1	11559	6044	9506.86	9828.14	4246.64	2825.21	1471.86	15517.8	5631.5	3749	8138.21	15708	9441.86	5656.64	9895	9783.93	3369.79	3086.93	1422.36
169.151	1653.71	1448.14	170.38	2504	11237.6	10109.4	6795.36	4430.43	5335.71	2691.07	1779.07	2250.36	11513.6	2335.64	10604.6	10705	8996.57	4099.43	4150.64	2384.71	2095.21	1497	10821.7	170.641	15229.4	7894.93	4339.93	10469.6	15006.6	11920.3	5972.21	8799.07	8843.21	4002.64	3431.5	1512.43	15801.9	6480.79	4158.5	8480.5	11938.4	9374.57	5270.86	9451.14	9271.93	3643.5	3098.93	1570.5
199.151	1487.07	1608.57	200.381	2282.14	11336.2	9227.43	8566.36	4029.5	4079.5	2373.14	1392.79	1812.57	10157.2	2319.93	11738.6	10315.8	8755.43	4194	4977.57	2861.43	1997.57	1996.21	11442.8	200.641	15513.1	7602.14	4155.43	13207.9	16094.3	11765.1	6896.43	9300.07	9218.14	4030.43	3408.71	1770.29	14614.4	6449.21	3949	9117.5	13203.8	7017.57	5337.64	10685.4	8664.43	4189.36	3718.14	1698
229.151	1581.5	1412.43	230.391	2026.93	11074	10048.7	8460.93	4611.5	4064.07	2902.43	1832.36	1968.29	10693.6	2112.29	13395.6	10619.2	8479.86	4134.93	4698.29	3137.36	1849.29	1817.71	11498.7	230.641	15669.2	6348.93	3967.36	12621.6	15829.1	12179.9	5645.5	9931.21	8489.14	3772.79	3571.21	1578.64	13372.1	6378.64	4370.64	7846.86	13310.8	6463.36	4914.43	9268.71	8718.79	3588.43	2984.14	1156.57
259.151	1788.29	1620.07	260.391	2458.14	12024	9361.93	8844.64	4503.93	4290.86	2664.21	1961.79	1998.07	10888.6	1889.64	12925.6	10969.9	8343.93	4227.93	5060	2446.93	1701.07	2377.71	10050.8	260.641	17027.1	6599	3807.43	10387.5	15025.3	11743.6	5277.29	9839.57	9450.43	3594.86	3734.93	1242.14	15730.8	6877.64	3843.21	7847.07	12287.7	6197.43	4836.86	8883.71	9766.43	4697.36	3031.86	1197.64
289.151	1606.86	1481.57	290.391	2305	13872.4	10587.4	9070.64	4719.86	4631.57	2437.64	1719	2012.93	10055.9	1780.43	12579	11683.7	6985.57	3687.29	4132.71	2888.07	1918.07	1906.86	10089.2	290.642	15848.9	6195.07	4270.14	10337.4	14970.9	12792.3	5576.93	9836.21	8192.64	3840.64	3700.21	1589	14069.7	6064.5	3813.29	8955.5	13298.1	5482	4904.71	9730.71	9829.36	4081.5	2698.43	1527.5
319.152	1738.14	1333.64	320.391	2588	11850.6	8380.64	9664.71	3818.14	4086.43	2174.79	1478.64	2076.86	10623.1	1949.36	14710.8	10359.1	7444.86	3795.64	4636	2310.43	2264.43	1605.79	10299	320.652	15688.7	6069.79	3601.21	10962.9	15675.1	11868.6	5583.86	8880.79	8752.5	3405.79	3794.07	1633.07	13076.3	6047.71	3819.79	8427.57	12802.3	6069.36	4879.64	9377.21	10248.5	4598.86	2869.71	1386.93
349.152	1864	1510.71	350.391	2753	11058.4	9752.57	9155.07	4435.5	4553.29	2490.79	1738.29	1808.57	10973.9	1520.36	14538.1	9833.21	7858.79	3820.36	4667.64	2709.14	1704.57	1819.07	10649.4	350.652	16703.2	6291.79	3666.07	9848.29	15868.9	11209.2	6190.86	8493.93	8566.14	3060.21	3403.36	1452.14	14211.9	6185.36	3445.57	8455.43	11765.1	6723	4577.86	9926.14	8746.57	3830.71	2764.57	1076.57
379.162	2142.79	1744.57	380.391	3371.21	10710.1	9592.93	9072.14	3982.5	4541.07	3035.64	1850.29	1859.21	10254.2	1669.36	11922.1	9351.93	8268.29	4009.36	5273.43	2589.5	2149.71	1743.36	11431.8	380.652	16143.6	5563.36	3087.79	12197.7	14655.1	11405.6	5893.79	8490.93	9308.14	3495.14	3234.21	1621.57	13496.1	5984.79	3045.14	8802.36	13222.4	7426.64	4626.5	10077.7	9503.07	2966	2527.36	1049.21
409.162	2201.43	1728.21	410.391	2389.29	10821.8	10100.1	8042	4294.57	4459	2129.93	1696.79	2049.57	12368.1	2095.93	12176.7	8637.57	7853.36	3864.21	4810.64	2557.36	2463.21	1766.43	10371.1	410.652	16300.4	5787.36	3023.71	12749.6	15771.6	10687.4	6928.07	8823.57	8961.86	3254.29	3762.64	1720	12495.1	5265.43	3600.79	8527.64	12532.1	6410.43	5225	8498.5	8997.36	3466.79	3178.71	1242.79
439.162	2105.21	1577.29	440.391	3043.43	11068.6	9567.5	8063.71	4247.71	4626.57	2307.43	1372.07	1856.86	12156.9	2001.93	13482.9	8581.36	8303.21	3999.71	5061.36	2927	1800.21	1616.07	9322.07	440.652	15076.1	5462.86	3791.43	12091.5	16688.6	11489.9	5977.21	8210.93	8359.14	3326.93	4220.43	1914.5	12564.1	5799.64	3740.29	8404.07	13126.6	7249.71	4321	8854.29	8141.29	3669.5	2924.64	984.429
469.162	2253.29	1758.93	470.402	2991.71	11829.2	9691.86	8729.21	3972.36	3850	2320	1449.21	2509.36	12511	1972.07	11916.6	8438.07	8602.36	3365.36	4596.57	2351.79	2102.93	1368.29	9743.21	470.652	16181.1	5937.86	3450.57	12547	16103.9	11403.3	5995.64	7733.86	7486.93	3987.57	4019.79	2118.79	12275.1	5705.57	3519.36	9512.21	11816.7	6761.57	4793.79	8705.07	8101.14	3549.71	2780.79	1051.07
499.162	2008.86	1633.86	500.402	3272.21	12464.1	9817	8996.57	3739.64	4589.57	2340.86	1879.43	2340.14	11262.2	1880.93	13217.2	8807.07	9213.29	3475.79	4967.79	2283.29	1758.79	1305.93	9283.57	500.652	17867.1	6120.57	3122	12256.9	16494.2	10723.1	6643.64	7455.14	7482.21	3551.93	3148.43	1816.29	12282.9	5432.07	3693.64	9884.93	11862.7	7977.29	5340.64	7809	7969.21	3524.86	2939.79	871.643
529.162	2027.36	1775.07	530.402	3348.43	12536.7	10196.4	9188.5	3992.5	4350	2843.57	1637.29	1845.93	12666.6	1915.57	11452.9	8405.5	8532.5	3487.86	4381.93	2352.07	1977	1733.79	9437.07	530.653	17502.8	5757.79	2909.5	12718.1	14590.3	11290.9	7498.71	7083.5	7851.36	4000.21	3043.14	2799.64	12480.1	6351.57	3055.86	9721.5	11199	9415.29	5053.43	7257.14	6916	3985.29	3029.86	1623
559.163	2171.71	1593.21	560.402	3775.07	12575.7	9837.07	7800.36	4043.21	4623.64	2467.86	1794.07	2120.36	11256.1	1684.14	11021.4	7790.43	7840	3111.93	4338	1967.43	2111.57	1830.07	10585	560.663	16095.8	5776.79	3045.86	12825.1	13429.6	11074.4	7097.43	7976.14	8190.86	3258.07	3290.5	2495.93	13554.2	6117.29	3873.14	9176.07	11743.7	8956.57	4585.29	6947.07	5688.93	3408.86	2443.14	1230
589.163	2057.14	1641.14	590.402	3298.71	12077.8	9273.5	8494	3500.07	4730.43	2602.86	1942	2632.71	11949.1	1583.36	12694.9	7545.93	6974.93	3597.43	3992.29	2353.64	1838	1739.36	9164.21	590.663	17591.6	6109.07	3462.5	12428.2	16187.3	9938.57	6880.36	7240.5	7050.86	3293.43	3586.07	2676.79	11801.6	5481.29	3816.43	9863.07	12941.8	9230.14	4588.57	7330.79	7092.64	3370.57	2475.86	1503.5
619.173	1936.07	1383.79	620.402	3294.43	13224.3	9636.86	7282.43	4710.71	4861	3143.79	1957.86	2318.86	11916.8	1555.57	10466.1	8183.21	6843.64	3535.79	4116.5	2378.14	1890.64	2035.86	9611.64	620.663	16639	6061.36	4150.07	12676.1	16156.9	10639.6	5720.71	7227.86	6846.14	3645.5	3136.14	2195.5	11879.7	5715.5	3629.79	8916	11931.2	9922.57	4924.29	7204.93	6157.64	3333.43	2918.79	1122.93
649.173	2149.86	1433.43	650.402	2896.21	13943.9	10293.4	6934.93	4766	5086.07	2882.86	1886.5	2232.79	12482.9	1793.71	10365.9	9040.14	7265.57	3253.14	4166.64	2566.86	1652.29	1723.57	9302.86	650.663	17613.3	6938.43	3285.36	12833.7	14226.3	10078.4	7130.64	7148.64	6397.14	3039.14	3510.93	3064.36	12268	5302.07	3806.43	9096	11458.6	10127	5510.86	7457.86	6874.5	2850.79	2809.86	1104.5
679.173	2162.07	1769.57	680.402	3522.71	12870.7	9704.21	7361.93	4578.14	5281.86	2658.36	2102.36	2088.79	11824.2	1286.5	9729.36	9316.79	6304.86	3195.86	3581.71	2140.43	1733.86	1403.29	9971.71	680.663	17493.8	6504.86	3416.5	13975.8	15983.1	11269.4	7481.86	7496.71	6960.64	3594.93	3264.5	2094.64	11703.9	6084.93	3204.21	9173.86	11987.9	9559.93	5319.71	6953.79	6120.43	3238.79	2661	954.143
709.173	2200.71	1405.5	710.413	3592.64	14509	9950	7399	4533.57	5215.57	2825.14	2588.43	2580.36	11661.6	1340.43	9341	7552.71	7050.5	3535	3460.79	2245	1820.5	1792.71	8367.86	710.663	17334.8	7176.57	3917.29	13940.6	16031.5	9666	7646.64	8204.29	6716.86	3472.14	3232.79	2303.36	12250.8	5330.93	2801.36	9091.21	12064.6	8633.79	5067.29	7852.43	6620	2879.93	2275.14	1086.14
739.173	2465.93	1722.71	740.413	4319.07	13228.4	9921.07	6552.43	4392.5	5476.14	2397.86	3193.64	2445.07	11226	1392.21	8836	8980.79	7291.14	3301	3443.36	2312.07	1758.36	1978.93	8454.86	740.663	18130.9	6292.43	4063.36	12765.6	15336.8	10139.8	7776.36	7303.43	7012.93	3227.71	2897.86	2102.5	11546.3	6089.14	3059.57	9585.14	11428.7	8822.57	5151.21	6956.79	7653.71	3296.57	2423.71	955.286
769.173	2202.29	1324.5	770.413	3490.14	13221.9	10098.1	6738.93	4084.57	4636.07	2520.93	2823.43	2515.71	12434.1	1373.93	10139.4	9238.71	6846	3744.36	3887.5	1998.93	1855.57	1616.86	8282.36	770.663	16717.1	6719.29	4530.5	11767.4	16060.4	11067.4	7980.86	7955.93	6791.36	3254.79	3546.36	2223.36	10879.6	4959.07	3169.86	9295.71	12562.9	8931.86	4530.36	7617.14	5745	3129.64	2051.5	1002.86
799.174	2235.14	1592.07	800.413	4421.14	13170.9	10123.9	7867.79	4586.14	4867.5	2491.93	2963	2250.93	12314.4	1261.86	11071.1	8564.57	9015.93	3746	4181.57	2932.79	1860.86	1286.79	8528.79	800.674	15715.4	6693.79	3772.14	11426	16061.8	10673	7999.71	7633.29	6254.36	3648.07	2291.64	1823.57	11383.6	4777.43	2761.14	9023.29	10992.6	9203.5	4624.36	6670.86	6204.43	3126.21	2211.07	988.929
829.174	2187.79	1567.36	830.413	4266.29	12321.8	10735.4	7575.86	4772.86	4769.21	2346.21	2606.29	2620.5	11077.1	1705.5	10491.1	8069.36	8585.07	3549.86	3573.29	2082.36	1740.93	1485.71	9200	830.674	16638.6	6184.79	3889.57	10973.4	15887.5	11842.7	9166.07	7332.79	7603.57	3068.07	3347.07	2298.79	11627.1	4759.64	2796.71	9284.21	9815.29	9720.29	4833.29	7980.93	6193.07	2970.71	2559	944.429
859.184	2156.14	1622.57	860.413	4587.5	11379.8	10674.4	6385	4264.14	4430.36	2529.64	3265.43	2803.5	11643	1438.21	12366.6	7895.86	8322.64	3766.5	3717.57	2374.93	2216.64	1413.93	7855.86	860.674	13750.5	6271.79	3589.93	11475.1	17287.6	13015.8	8617.93	7427.07	6126.43	3403.5	3711.57	1993.86	12410.2	5562.21	2425.86	7993.86	11267	9168	4862.71	7165.43	6395.14	3145	2628.14	793.214
889.184	2152.36	1427.93	890.413	3824.21	12082.9	10748.1	7695.07	4785.71	4740.14	2813.14	2457.79	2800.5	10846.7	1281.29	11321.5	9149	7717.14	3881.71	3140.21	2608.36	1414.43	1385.64	8394.36	890.674	14128.6	6591.36	3752	11413.8	15364.5	11340.4	7302.57	7320.79	6341.29	3356.07	3016.5	2050.57	11196.4	5649.57	2951.93	8269.71	10413.4	8744	4819.86	7484.71	6452	2851.43	2418.14	675.643
[truncated: 15 more columns]

## Sheet: WT4
REORGANIZED DATA FROM 3 FIELDS	CELL FRAP	CONTROL	CELL FRAP	CONTROL	CELL FRAP	CONTROL	CELL FRAP	CONTROL	CELL FRAP	CONTROL	CELL FRAP	CONTROL	CELL FRAP	CONTROL	CELL FRAP	CONTROL	CELL FRAP	CONTROL	CELL FRAP	CONTROL	CELL FRAP	CONTROL	CELL FRAP	CONTROL	CELL FRAP	CONTROL	CELL FRAP	CONTROL	CELL FRAP	CONTROL	CELL FRAP	CONTROL	CELL FRAP	CONTROL	CELL FRAP	CONTROL	CELL FRAP	CONTROL	CELL FRAP	CONTROL	CELL FRAP	CONTROL	CELL FRAP	CONTROL	CELL FRAP	CONTROL	CELL FRAP	CONTROL	CELL FRAP
Axis [s] - TIME	ROI1 []	ROI17 []	ROI2 []	ROI18 []	ROI3 []	ROI19 []	ROI4 []	ROI20 []	ROI5 []	ROI21 []	ROI6 []	ROI28 []	ROI7 []	ROI23 []	ROI8 []	ROI24 []	ROI9 []	ROI25 []	ROI10 []	ROI26 []	ROI11 []	ROI27 []	ROI12 []	ROI28 []	ROI13 []	ROI29 []	ROI14 []	ROI30 []	ROI15 []	ROI31 []	ROI16 []	ROI32 []	ROI1 []	ROI14 []	ROI2 []	ROI15 []	ROI3 []	ROI16 []	ROI4 []	ROI17 []	ROI5 []	ROI18 []	ROI6 []	ROI19 []	ROI7 []	ROI20 []	ROI8 []	ROI21 []	ROI9 []
0	19.7692	20.3846	20.5385	18.3077	17.8462	17.1538	18.0769	18.6923	8	9.61538	6.53846	7.53846	21.1538	22.6923	19.9231	20.3077	6.61538	8.30769	9.53846	9.61538	8.69231	7.46154	8.07692	7.53846	8.30769	9.61538	10.5385	11	15.5385	15.8462	24.5385	27.2308	40.3846	39.7692	25.9231	25.8462	9.76923	10.3846	10.7692	10.4615	5.76923	5.92308	7.30769	6.69231	9.07692	10.4615	14.6923	14.4615	11.6923
5.16	20.3846	20.0769	16.6154	19.3846	17.0769	17.9231	18.3846	16.1538	9.07692	8.46154	7.46154	6.23077	23	20.7692	19.0769	20.7692	6.23077	5.92308	7	7.23077	7.38462	7.53846	5.92308	6.23077	9.84615	8.69231	10.7692	10.3077	15.6923	13.2308	26.6923	25.4615	36.1538	36.0769	23.3077	22.6923	9.38462	9.38462	10.1538	10.2308	5	5.15385	6.38462	6.61538	10.4615	8.53846	12.9231	12.5385	10.2308
15.27	12.4615	20.7692	13	16.2308	11.6154	13.7692	11.7692	13.7692	8.15385	8.69231	5.84615	6.46154	14	19.6923	8.84615	18.3077	3.69231	7.46154	5.69231	6.84615	7.30769	8	5.46154	6.46154	5.61538	10.2308	7.23077	10.7692	8.76923	12.3846	14.1538	20.3846	30.6154	22.8462	21.6923	22.1538	7.92308	9	7.46154	9.07692	3.84615	6	4.76923	5.46154	6.84615	8	9.46154	12.4615	10.2308
20.501	15.0769	23.7692	14.8462	18.3077	12.9231	16.1538	14.1538	15.7692	6.92308	8.30769	5.61538	6.61538	18.3846	21.5385	13.3846	18	4.38462	7.92308	5.76923	6.46154	7.53846	6.15385	5.15385	6.61538	7.76923	9.76923	8.46154	10.3846	11.3846	10.6923	14.8462	23.7692	30.3077	26	20.7692	19.4615	8.69231	8.61538	6.61538	8.61538	5.15385	5.53846	4.61538	5.84615	7.30769	8.76923	11.0769	12.3077	8.46154
50.501	16.1538	21.8462	17.4615	18.6923	15.1538	16.3077	13.7692	16.6154	7	9.76923	4.38462	5.15385	19.5385	23.3846	16.7692	15.6154	5.84615	7.23077	7.38462	6.46154	7.23077	6.46154	6.30769	5.15385	10.2308	11.3077	10.3846	10.6154	13.1538	12.6154	17.4615	21.4615	32	29.6154	19.7692	26.0769	8	9.15385	9.53846	10.9231	5.15385	6.38462	5.38462	5.61538	8.84615	7.38462	11.7692	12.1538	10.1538
80.501	17	20.4615	18.7692	20.2308	15.1538	14.9231	17.9231	16.2308	8.92308	9.76923	6.15385	6.38462	18.8462	20.6923	18.1538	16.3846	5.61538	8.84615	7.69231	6.53846	6.84615	7.07692	6.69231	6.38462	7.84615	9.61538	9.69231	10.3077	13.3846	14.2308	23	21.0769	34.3077	36.8462	20.3077	27.3077	7.92308	9.23077	10.1538	9.07692	3.76923	5.84615	5.76923	6.84615	8.46154	7.46154	10.6154	11.6923	9.38462
110.511	14.6923	21.6154	16.6923	18.7692	13.0769	17.6154	15.0769	15.1538	8.69231	11	6.69231	6.15385	20.7692	18.9231	19.1538	16.4615	6.15385	8.15385	8	6.76923	8	6.30769	6.15385	6.15385	8.53846	9.46154	10.6154	11.4615	14.7692	14.3077	22	19.6923	34.1538	36.5385	18.9231	26.3846	8.30769	9.46154	9.61538	10.3846	4.15385	5.53846	5.92308	5.61538	9.23077	8.23077	10.9231	10.9231	9.92308
140.511	15.3846	19.4615	16.8462	20.0769	15.1538	16.3846	13.6923	13.8462	7.69231	9.30769	6	4.76923	21.1538	20.6923	16.9231	17.2308	6.38462	7.84615	7.23077	7.69231	8.30769	6.38462	6	4.76923	9.69231	8.76923	10.2308	11.1538	13.3846	12.3077	22.1538	20.0769	32.3846	40.7692	18.9231	24.6154	9.69231	8.92308	8.69231	9.15385	4.76923	5.53846	5.23077	7.61538	8.15385	7	10	13.9231	9.23077
170.511	14.0769	19.1538	15.3846	19.8462	16.3077	17.3846	15.2308	13.4615	7.46154	10.1538	6.84615	6	20.9231	20.8462	18.2308	17.9231	6	7.84615	7.61538	6.53846	7.46154	5.23077	7.69231	6	7.30769	9.92308	11.9231	10.6923	16.3846	13	19.3077	20.0769	33.6154	39.9231	18.2308	31.2308	7.07692	10.1538	9.84615	8.46154	5	6.30769	6.15385	5.46154	9.61538	5.61538	12.5385	10.9231	8.76923
200.511	14.5385	20.5385	16.9231	19.7692	13.2308	16.2308	13.1538	13.6923	9.84615	8.84615	7.30769	5.23077	21.4615	20.9231	18.1538	15.2308	6.76923	8.69231	7.76923	8.46154	9.46154	6.61538	6.53846	5.23077	9.92308	9.46154	10.6923	9.46154	16.4615	13.0769	23.5385	20.2308	33.0769	38.7692	18.6154	24	8.38462	8.84615	9.30769	10.0769	5.53846	6.07692	4.76923	7.46154	10.0769	7	13.1538	11.5385	9.30769
230.511	14.6154	18.5385	17.3077	20	14.9231	16.3846	15.3846	13.6154	7.92308	9	7	6.38462	21.7692	19.6154	16.9231	16.0769	6.92308	7.69231	8.61538	6.23077	7.46154	6.46154	6.30769	6.38462	8.23077	8.15385	9.84615	9.46154	15.2308	13	23.8462	19.2308	33.6154	40.2308	19.9231	26.2308	7.30769	8.15385	10.3077	8.92308	5.69231	4.92308	5.61538	5.30769	10.1538	7.92308	12.3846	11.3846	8.76923
260.511	14.3077	17.3846	17.7692	17.4615	14.3846	17.0769	17.0769	12.8462	8.38462	8.69231	8.07692	6	19.4615	21.5385	20.6154	17.3846	7.23077	7.53846	7.30769	8.53846	7.76923	6	7.61538	6	9.30769	8.23077	11.2308	11.0769	18.4615	13.0769	22.8462	19.8462	31.1538	38.5385	20.3077	27.2308	8.84615	9.23077	10.3077	9.92308	4.53846	5.30769	6.23077	7.84615	8.84615	6.30769	12.3077	11.0769	9.84615
290.512	14.5385	20.3077	18.4615	18.3077	18.9231	18.7692	17.3846	13.1538	8.84615	8.53846	7.23077	6.07692	23.3846	19.2308	18.5385	14.5385	7.76923	7.61538	6.30769	7	8	5.76923	7.46154	6.07692	8.15385	8.23077	10.2308	10.7692	18.8462	13.3846	22.6154	21.3846	36.8462	35.3077	20.5385	23.8462	8	8.38462	9.53846	10.1538	5.61538	4.61538	5.61538	6.15385	10.0769	7.30769	12.6154	9.38462	10.4615
320.522	15.5385	19.4615	17	21.2308	14.6154	17.6154	17.1538	15.7692	7.07692	10.0769	7.92308	5.69231	20.8462	20.3077	18.0769	16.4615	5.46154	7.92308	6.92308	7.23077	8.38462	4.76923	6.69231	5.69231	11.8462	10.2308	8.61538	10.9231	18.6923	14.6923	22	21.3077	32.3846	35.1538	22.6154	26.6923	9	8.46154	9.07692	9.30769	5.76923	5.38462	6.07692	5.15385	9.61538	7	11.3846	7.61538	9.46154
350.522	18.2308	17.6923	17.0769	18.2308	19.0769	16.0769	15.5385	12	7.23077	10.5385	7.84615	5.07692	21.8462	19	20.2308	17.6154	7	7.15385	8.46154	7.15385	7.76923	6.23077	7.38462	5.07692	10.6923	9.15385	10.2308	9.07692	19.3846	14.7692	21.3846	19.8462	32.1538	30.8462	25	27.9231	7.53846	9.76923	9.46154	8.61538	5.46154	4.07692	5.15385	6.23077	9.53846	9	10.1538	9.61538	10.3846
380.522	17.2308	15.8462	19.6154	20.1538	16.0769	15.3846	15.8462	14.3077	7.38462	8.23077	8.53846	5.30769	21.9231	19.6154	18.4615	16.7692	7.69231	6.92308	8.76923	6.23077	9	6.38462	10.6923	5.30769	10.6154	8.84615	10.2308	10.3077	16.9231	13.3846	25.9231	18.3846	36.4615	29.7692	24	25.7692	8.38462	11.6154	10.8462	6.92308	5.61538	4.61538	5.84615	5.38462	7.69231	8.46154	11.7692	8.23077	11.8462
410.522	18.4615	17.5385	18.9231	20.2308	15.6923	14.6154	15.6923	13.6923	8	7.92308	8.15385	4.92308	23.3077	19.8462	17.6154	15.2308	7.30769	7.61538	8	6.38462	9.69231	5.23077	9.30769	4.92308	10.3077	9	10.0769	9.92308	18.5385	16.6154	22.0769	19.4615	37.7692	29.3077	26.0769	26.0769	8.23077	8.76923	10.3077	10.2308	5	4.92308	5.07692	4.69231	9.92308	6.61538	10.6923	10.5385	11.6923
440.522	18.5385	16.4615	19.5385	21.1538	16.0769	17	16.9231	15.2308	7.92308	7.23077	7.92308	4.38462	22.2308	18	18.7692	16.7692	7.61538	8.15385	8.69231	8.46154	8.30769	5.15385	9.61538	4.38462	11.0769	9.07692	9.61538	8.69231	20.6923	14.2308	24.0769	21	36.8462	29.1538	26.5385	23	8.46154	7.76923	9.61538	8.15385	5.69231	4.38462	6.61538	6	9.69231	6.38462	11.1538	11.9231	13.9231
470.522	19.1538	15.9231	19.2308	21.9231	15.3846	16	17.8462	12.7692	8.23077	7.61538	8.38462	5	20.8462	17.3077	16	15.9231	7.38462	8.07692	8	8.15385	10.6923	6.15385	7.07692	5	10.7692	8.46154	8.84615	8.46154	18.8462	16.9231	25.9231	18	34.0769	27.9231	26.3846	26.2308	7.07692	7.76923	9.92308	8.30769	4.84615	4.61538	4.61538	5.92308	10.7692	7.46154	9.76923	10.4615	16.0769
500.522	19.3077	16.3846	17.7692	20.0769	14.9231	14.3077	15.1538	12	7.92308	8.92308	9.76923	5.07692	24.0769	17.3846	17.2308	16.3077	7.46154	7.23077	8.15385	8.30769	10.2308	6.30769	9.69231	5.07692	10.3077	9.46154	9.76923	8.15385	21.6154	13.8462	19.7692	20.2308	34.3077	30.6923	28.3077	24.0769	7.61538	8.69231	9.30769	8.23077	5.84615	4.07692	5.84615	5.53846	9.23077	7.76923	10.6923	8.84615	15.3077
530.523	23.3077	19.4615	20.0769	20.1538	15.9231	16.2308	17.6154	12.9231	9	6.15385	8.92308	4.76923	21	18.3846	19.5385	17	7.92308	6.92308	9.23077	6.30769	9.15385	6	9.15385	4.76923	10.4615	8.84615	8.69231	9.23077	23.6154	15.6923	22.8462	18.5385	37.3077	31.7692	29.1538	25.1538	8.30769	8.46154	11	8.38462	7.15385	4.23077	5.15385	5	8.23077	7.23077	13.1538	12.3846	13.6154
560.523	21.8462	17.7692	19.0769	20.2308	17	13.6923	14.1538	13.3846	8.07692	7.53846	8.69231	4.53846	20.6923	17.8462	18.3846	16.9231	9.69231	8.30769	8.76923	6.30769	8.84615	4.84615	9.07692	4.53846	11.4615	8.30769	10.3846	10.3077	23	14	25.8462	17.4615	36.8462	30.5385	31	26.0769	6.84615	9.30769	9.84615	7	7.30769	4.53846	5.30769	6	10.8462	8.38462	14.8462	10.3846	14.6154
590.533	22.6923	18.0769	20.2308	19.3077	14.6923	15.8462	16.4615	14.7692	7.69231	9.23077	9	4.38462	23.4615	17.1538	17.2308	16.9231	8.46154	6.30769	8.46154	5.53846	10.1538	5.84615	7.76923	4.38462	11.0769	9.61538	9.61538	8.76923	22.4615	15.8462	27.6923	18.3846	38.7692	32.8462	33.3077	23.6923	7.15385	8.30769	8.23077	7.53846	8.07692	4.76923	4.92308	4.53846	11.6923	8.46154	13.8462	9	13.2308
620.533	24.4615	19.3846	17.9231	19.7692	15.8462	13.8462	17.3846	14	7.38462	6.76923	8.69231	3.69231	20.1538	18.5385	19.4615	14.9231	10.8462	5.84615	7.84615	6.69231	10.2308	4.61538	9	3.69231	12.2308	7.84615	10	8.84615	26.3846	15.4615	28.9231	17.5385	36.1538	33.4615	30.6923	23.3846	6.92308	8.61538	10.2308	7.61538	7.46154	3.61538	5.69231	4.15385	8.38462	8.30769	15.1538	9.46154	15
650.533	21.4615	15.6923	17.9231	20.8462	11.9231	15	16.3077	13.5385	8.38462	7.46154	8	4.38462	17	16.4615	18.1538	17.0769	9.92308	6.84615	9.76923	6.61538	8.46154	5.15385	9	4.38462	10.6154	7.30769	10.3846	8.07692	22.8462	15.3077	24.3077	19	36.5385	29.3077	28.5385	26.2308	6.84615	9.46154	9.92308	9.53846	8.23077	3.15385	5.30769	3.92308	12	6.92308	12.9231	10.4615	14.9231
680.533	23.2308	18.8462	17.8462	19.1538	14.6923	14.6923	15.7692	13.8462	7.30769	6.84615	9.61538	4.07692	19.9231	15.5385	17.6154	14.3846	10.4615	7.38462	9.76923	7.61538	10.6154	4.76923	9.07692	4.07692	12	8.30769	9.76923	8	24.1538	17.7692	27.2308	20.8462	34.2308	28.9231	30.5385	24.6154	6.76923	9	9.46154	7.46154	7.76923	4.69231	6.23077	4.92308	9.84615	7.07692	11.6923	9.92308	13.7692
710.533	23.7692	16.3846	18.6923	19.4615	12.9231	14.6923	16.3077	14.1538	9.38462	8.23077	9.53846	4.38462	20.4615	16.6923	18.6923	17	9.84615	7.61538	10.3846	5.92308	7.61538	5.76923	8.15385	4.38462	9.53846	7.07692	10.6923	9.15385	21.9231	17.1538	23.6154	19.6923	35.1538	27.4615	32.3077	23.1538	6.07692	10	10.6154	7.07692	8.76923	4.07692	4.53846	3.92308	9.46154	7.69231	16.4615	10.3077	13.2308
740.533	21.9231	19	16.8462	18.5385	14.3846	13.2308	17.3846	13.6154	8.76923	7.07692	11.8462	3.76923	19.6154	17	20	17.8462	9.69231	7.15385	9.84615	7.07692	9.46154	4.53846	7.76923	3.76923	10.6154	9.23077	11.0769	7.69231	22.4615	14.3077	24	18	36	28.2308	34.7692	24.8462	6.30769	9.61538	9.46154	8	8.30769	3.38462	5.69231	4.46154	10.0769	8.61538	12.5385	10.6923	13.6923
770.534	21.8462	19.4615	17.2308	18.5385	15.4615	13.4615	15.2308	12.8462	9.46154	6	9.84615	3.84615	20	18	18.2308	18	9.38462	8.30769	11.8462	8	10.1538	5.84615	7.53846	3.84615	12.0769	7.30769	9.23077	7.84615	25	18.2308	24.6154	20	36.8462	26.7692	34.6923	25.1538	7.53846	8.61538	8.61538	8.76923	8.07692	5.61538	6.38462	5.15385	11.3077	7.76923	12.7692	9.38462	15
800.534	19.1538	19.2308	19.1538	17.4615	14.3077	13.3077	15.2308	11.7692	9.61538	7.15385	9.84615	3.61538	20.6154	14.7692	23	18.7692	12.4615	8.53846	8.92308	7.15385	9.38462	5.23077	9.53846	3.61538	9.69231	7.69231	9.38462	7.46154	24.2308	14.9231	26.0769	17.8462	37.5385	27.7692	34.6154	24.6923	6.53846	8.76923	9.76923	6.46154	8	4.30769	7.07692	4.38462	11.3077	7.23077	18	10	14.1538
830.544	21.9231	17.8462	18.6154	18.5385	14.1538	14.2308	18.4615	12.9231	10.9231	7.61538	11.0769	3.76923	20.2308	16.4615	20.5385	19.2308	9.30769	8.23077	10	5.61538	10.1538	6.53846	7.38462	3.76923	10.0769	6.46154	8.92308	8.07692	24	13.7692	27.7692	16.9231	33.7692	28.6923	35.3077	25.6154	8.46154	7.30769	10.6154	7.69231	7.46154	4.53846	6.61538	3.76923	10.3077	7.76923	15.8462	9.53846	14.4615
860.544	21.0769	18.8462	18	14.7692	12.6923	13.0769	15	12.3846	9.07692	7	9.84615	3.46154	23.2308	15.4615	22.3077	15.5385	10.5385	7.30769	11.6923	5.69231	9.69231	5.46154	6.61538	3.46154	9.46154	8.07692	9.76923	7.23077	27.3077	15.8462	26.3077	17.0769	38.1538	22.6154	35.3077	24.3846	9.30769	7.46154	8.23077	7.30769	8.92308	4.38462	5.15385	4.23077	11.0769	6.92308	15.2308	8.15385	15.9231
890.544	22.7692	16.2308	18.7692	16.1538	14.6154	13.6154	15.1538	14.7692	12.5385	8.92308	10.6154	3.53846	25.3846	17.0769	20.3846	15.1538	12.3846	7.30769	10.3077	7.30769	7.92308	7	7.92308	3.53846	10.8462	7.84615	8.76923	8.76923	28.5385	17.6923	23.4615	16.3077	37.6154	26.8462	38.2308	22.8462	7.92308	9.84615	8.76923	7.53846	6.76923	3.53846	6.53846	3.84615	11.3077	8.07692	16.1538	9.23077	13.3077
	0 = mean of signal before frap
Ploted data	Calculation of total # cells in all fields
	1	2	3	4	5	6	7	8	9	10	11	12	13	14	15	16	17	18	19	20	21	22	23	24	25	26	27	28	29	30	31	32	33	34	35	36
0	99.2395	98.5714	99.5614	104.636	94.4681	101.676	101.593	94.9438	90.2703	98.1735	107.179	101.676	99.1597	100	107.407	97.2263	100.913	101.426	96.8872	101.115	97.2222	102.89	102.834	102.279	96.9388	98.4962	113.559	94.8387	96.6667	100.919	100.469	98.5632	97.6744	95.1613
15.27	60	80.0948	84.3575	85.4749	93.8053	90.4762	71.0937	48.3193	49.4845	83.1461	91.3462	84.5238	54.8872	67.1429	70.8075	69.434	134.007	97.9167	88.0342	82.2034	64.1026	87.3239	85.5769	75.9259	77.3256	75.7576	104.545	70	65.5556	65.5797	63.8436	69.3989	55.9633	63.2768
20.501	63.4304	81.0924	80	89.7561	83.3333	84.8837	85.3571	74.359	55.3398	89.2857	122.5	77.907	79.5276	81.4815	106.475	62.4595	116.568	106.719	100.893	76.7857	93.0556	78.9474	83.3333	90	70.0637	77.9412	76.5625	69.7674	71.4286	69.1729	56.5495	91.3333	71.4286	72.3529
50.501	73.9437	93.4156	92.9245	82.8704	71.6535	85.0746	83.5526	107.389	80.8511	114.286	111.905	122.388	90.4762	97.8261	104.268	81.362	108.052	75.8112	87.395	87.3239	80.7229	95.8904	119.792	96.8354	84.0764	107.692	126.923	78.3133	122.353	101.31	77.7027	112.698	92.233	95.5307
80.501	83.0827	92.7757	101.546	110.427	91.3386	96.3855	91.0781	110.798	63.4783	117.647	96.7391	104.819	81.6	94.0299	94.0541	109.124	93.1106	74.3662	85.8333	111.864	64.4737	84.2697	113.402	90.7895	74.8466	75.6757	108.475	132.353	97.7528	78.4247	88.535	98	76.5217	116.418
110.511	67.9715	88.9344	74.2358	99.4924	79.021	108.75	109.756	116.355	75.4717	118.182	126.829	100	90.2439	92.6174	103.226	111.719	93.4737	71.7201	87.8049	92.5926	75	105.479	112.15	100	83.2258	104.918	105.357	96.0526	104.706	98.1061	75.9887	104.828	98.913	106.79
140.511	79.0514	83.908	92.4883	98.8889	82.6446	125.806	102.23	98.2143	81.3725	94	130.12	125.806	110.526	91.7241	108.75	110.345	79.434	76.875	108.621	94.958	86.1111	68.6869	116.484	71.8232	84.507	98.5075	107.843	140.984	103.409	107.812	96.4516	110.526	116.456	103.268
170.511	73.494	77.5194	93.8053	113.143	73.4848	114.103	100.369	101.717	76.4706	116.471	142.647	128.205	73.6434	111.511	126.036	96.1686	84.2004	58.3744	69.697	116.364	79.2683	112.676	171.233	114.789	74.026	110.169	103.922	115	93.6709	127.65	94.8553	100	102.97	123.81
200.511	70.7865	85.6031	81.5166	96.0674	111.304	139.706	102.574	119.192	77.8761	91.8182	143.023	125	104.878	113.008	125.882	116.35	85.3175	77.5641	94.7826	92.3664	91.1392	63.9175	143.956	114	82.3129	100	146.939	115.873	115.942	104.382	112.367	115.714	100	132.68
230.511	78.8382	86.5385	91.0798	112.994	88.0342	109.639	110.98	105.263	90	138.272	115.476	98.7952	100.943	104.065	117.16	124	83.5564	75.9531	89.6226	115.517	115.625	105.797	128.155	108.784	87.0229	106.557	168.293	146.667	94.1176	129.384	125.468	140.476	78.6408	174.797
260.511	82.3009	101.762	84.2342	132.934	96.4602	134.615	90.3571	118.584	95.9184	85.5856	129.487	126.923	113.084	101.389	141.176	115.116	80.8383	74.5763	95.8333	103.876	85.5072	79.4118	140.244	111.111	107.563	110.526	137.5	163.793	97.5904	140.58	112.5	132.061	118.182	174.436
290.512	71.5909	100.84	100.82	132.164	103.604	118.987	121.6	127.513	102.02	90.1099	138.667	122.785	99.0654	95	140.805	105.755	104.357	86.129	95.4128	93.9394	121.667	91.25	137.895	134.426	125.926	104.839	139.13	168.421	83.7209	135.61	114.685	110.256	110.112	215.702
320.522	79.8419	80.0725	82.9694	108.78	70.229	139.189	102.652	109.813	68.932	95.7447	175.806	117.568	115.789	78.8732	127.225	103.249	92.1225	84.7262	106.364	97.5207	107.143	117.91	137.363	149.495	116.038	122.807	182.927	130.159	118.571	126.697	119.366	137.405	89.1304	265.138
350.522	103.043	93.6709	118.66	129.487	68.6131	154.545	114.98	114.847	97.8495	118.28	124.691	145.455	116.807	112.712	131.25	107.752	104.239	89.5317	77.1654	109.821	133.962	82.716	105.983	105.6	142.105	135.556	184.615	137.931	101.333	110.044	156.017	122.819	80.1887	242.056
380.522	108.738	97.3282	104.5	110.753	89.7196	160.87	111.765	110.092	111.111	140.741	140.964	201.449	120	99.2537	126.437	141.004	122.481	93.1343	72.1854	156.667	121.667	108.571	90.9091	142.991	216.901	112.069	208.824	120	93.3333	169.512	126.19	117.007	104	197.727
410.522	105.263	93.5361	107.368	114.607	100.971	165.625	117.442	115.657	95.9596	125.301	185.294	189.063	114.53	101.55	111.574	113.439	128.871	100	93.8596	100.752	101.563	108.197	150	101.46	170.787	164	164.865	144.828	134.722	119.672	138.321	142.963	138.158	234.127
440.522	112.617	92.3636	94.5701	111.111	109.574	180.702	123.504	111.927	93.3962	102.727	161.194	219.298	122.034	110.619	145.405	114.652	126.385	115.385	108.911	117.925	129.825	110.256	151.807	93.5484	241.333	130.769	159.524	120.588	125	191.124	143.86	150.388	114.634	226.667
470.522	120.29	87.7193	96.1538	139.759	108.081	167.692	120.444	100.483	91.4286	98.1132	173.75	141.538	127.273	104.545	111.364	144.017	122.039	100.587	91.0891	119.444	105	77.9221	144.33	93.3824	222.34	142.857	155	136.667	164.615	139.252	149.242	144.966	149.231	252.941
500.522	117.84	88.5057	104.301	126.282	88.7931	192.424	138.496	105.66	103.191	98.1481	162.195	190.909	108.943	119.811	156.111	97.7186	111.779	117.572	87.6106	113.084	143.396	105.556	118.812	120.87	231.395	147.059	173.529	155.556	150.746	205	133.101	157.857	109.412	280.672
530.523	119.763	99.6183	98.1043	136.31	146.25	187.097	114.226	114.932	114.444	146.341	152.564	191.935	118.261	94.1667	150.49	123.237	117.433	115.902	98.1818	131.193	169.091	103.077	113.83	106.211	208.235	163.265	178.947	156.522	132.468	175.269	149.164	153.03	118.293	232.576
560.523	122.944	94.2966	124.157	105.747	107.143	191.525	115.948	108.636	116.667	139.024	182.54	200	137.963	100.746	164.286	148.018	120.655	118.879	73.5537	140.659	161.017	88.4615	129.358	142.963	253.333	116.667	193.333	185.455	126.667	167.513	146.816	133.775	108.434	205
590.533	125.532	104.781	92.7184	111.458	83.3333	205.263	136.771	101.818	134.146	152.778	173.684	177.193	115.2	109.649	141.748	150.628	118.033	140.584	86.1111	109.184	169.355	108.475	138.182	153.846	184.946	161.702	221.212	131.818	114.286	213.158	170.204	172.727	104.124	188.321
620.533	126.19	90.6615	114.444	124.176	109.091	235.417	108.714	130.412	185.526	117.241	221.667	243.75	155.882	113.043	170.647	164.912	108.046	131.25	80.3571	134.343	206.383	137.037	100.926	160.163	256.579	158	203.125	172.414	136.986	207.059	154.217	165.441	88.9908	207.874
650.533	136.765	85.9779	79.4872	120.455	112.371	182.456	103.271	106.306	144.944	147.674	164.179	205.263	145.263	128.571	149.246	127.935	124.672	108.798	72.3577	104.032	260.976	135.294	173.333	123.529	230.952	153.061	175	140.323	143.056	219.079	136.949	153.846	91.0891	207.857
680.533	123.265	93.1727	100	113.889	106.742	235.849	128.218	122.46	141.667	128.283	222.581	222.642	144.444	122.115	135.931	130.627	118.351	124.062	75.2137	126.804	165.574	126.563	139.13	117.829	245.205	177.358	180.556	190.741	135.938	249.635	170.229	125.166	105	171.25
710.533	145.07	96.0474	87.9581	115.217	114.019	217.544	122.581	109.955	129.293	175.325	132	185.965	134.783	116.807	127.803	119.922	128.011	139.535	60.7692	150	215.094	115.686	123	159.701	217.722	148.077	222.581	175.439	178.333	206.25	151.254	157.627	86.5385	170
740.533	115.385	90.8714	108.721	127.684	123.913	314.286	115.385	112.069	135.484	139.13	208.475	206.122	115	144	156.989	133.333	127.52	139.938	65.6	118.269	245.455	127.586	116.964	117.266	193.478	158.333	177.143	176.563	133.333	265.385	161.151	123.841	126.506	227.5
770.534	112.253	92.9461	114.857	118.563	157.692	256	111.111	101.282	112.963	148.077	173.684	196	165.263	117.647	137.131	123.077	137.644	137.92	87.5	98.2456	143.836	123.881	145.545	136.066	256.579	128.571	166.667	150	167.164	253.383	155.762	157.273	94	225
800.534	99.6	109.692	107.514	129.412	134.409	272.34	139.583	122.541	145.946	124.731	179.412	263.83	126	125.773	162.371	146.121	135.18	140.187	74.5614	151.19	185.714	161.404	156.383	180	211.494	152.941	178.125	162.5	147.222	250.746	170.566	133.333	114.815	218.852
830.544	122.845	100.415	99.4595	142.857	143.434	293.878	122.897	106.8	113.084	178.082	155.294	195.918	155.952	110.476	174.302	164.091	117.694	137.838	115.789	138	164.407	175.51	132.673	166.129	200	195.745	266.667	204	159.649	253.846	173.725	123.944	158.571	215.714
860.544	111.837	121.875	97.0588	121.118	129.67	284.444	150.249	143.564	144.211	205.405	177.465	191.111	117.143	135.106	172.33	154.054	168.707	144.795	124.742	112.632	203.509	121.818	160	186.792	227.473	161.017	164.516	166.667	194.915	228.966	126.415	149.593	121.978	274.528
890.544	140.284	116.19	107.345	102.604	140.517	300	148.649	134.518	169.474	141.053	113.187	223.913	138.235	100	161.304	143.868	140.115	167.34	80.4687	116.327	191.304	170	140	175	190.11	135.484	293.75	161.765	160.274	283.333	154.34	156.349	120.779	263.478
Channel,001 - GFP	RAW DATA imported LAS AF software																																Channel,001
Axis [s]	ROI1 []	ROI2 []	ROI3 []	ROI4 []	ROI5 []	ROI6 []	ROI7 []	ROI8 []	ROI9 []	ROI10 []	ROI11 []	ROI12 []	ROI13 []	ROI14 []	ROI15 []	ROI16 []	ROI17 []	ROI18 []	ROI19 []	ROI20 []	ROI21 []	ROI22 []	ROI23 []	ROI24 []	ROI25 []	ROI26 []	ROI27 []	ROI28 []	ROI29 []	ROI30 []	ROI31 []	ROI32 []	Axis [s]	ROI1 []	ROI2 []	ROI3 []	ROI4 []	ROI5 []	ROI6 []	ROI7 []	ROI8 []	ROI9 []	ROI10 []	ROI11 []	ROI12 []	ROI13 []	ROI14 []	ROI15 []	ROI16 []
0	19.7692	20.5385	17.8462	18.0769	8	6.53846	21.1538	19.9231	6.61538	9.53846	8.69231	8.07692	8.30769	10.5385	15.5385	24.5385	20.3846	18.3077	17.1538	18.6923	9.61538	7.46154	22.6923	20.3077	8.30769	9.61538	7.46154	7.53846	9.61538	11	15.8462	27.2308	0	40.3846	25.9231	9.76923	10.7692	5.76923	7.30769	9.07692	14.6923	11.6923	4.46154	5	5.30769	7	39.7692	25.8462	10.3846
5.16	20.3846	16.6154	17.0769	18.3846	9.07692	7.46154	23	19.0769	6.23077	7	7.38462	5.92308	9.84615	10.7692	15.6923	26.6923	20.0769	19.3846	17.9231	16.1538	8.46154	7.38462	20.7692	20.7692	5.92308	7.23077	7.53846	6.23077	8.69231	10.3077	13.2308	25.4615	5.16	36.1538	23.3077	9.38462	10.1538	5	6.38462	10.4615	12.9231	10.2308	5.61538	5.30769	6	6.38462	36.0769	22.6923	9.38462
15.27	12.4615	13	11.6154	11.7692	8.15385	5.84615	14	8.84615	3.69231	5.69231	7.30769	5.46154	5.61538	7.23077	8.76923	14.1538	20.7692	16.2308	13.7692	13.7692	8.69231	7.07692	19.6923	18.3077	7.46154	6.84615	8	6.46154	10.2308	10.7692	12.3846	20.3846	14.83	30.6154	21.6923	7.92308	7.46154	3.84615	4.76923	6.84615	9.46154	10.2308	3.84615	3.53846	4.30769	4.53846	22.8462	22.1538	9
20.501	15.0769	14.8462	12.9231	14.1538	6.92308	5.61538	18.3846	13.3846	4.38462	5.76923	7.53846	5.15385	7.76923	8.46154	11.3846	14.8462	23.7692	18.3077	16.1538	15.7692	8.30769	9.46154	21.5385	18	7.92308	6.46154	6.15385	6.61538	9.76923	10.3846	10.6923	23.7692	20.06	30.3077	20.7692	8.69231	6.61538	5.15385	4.61538	7.30769	11.0769	8.46154	4.07692	3.76923	4.61538	5	26	19.4615	8.61538
50.501	16.1538	17.4615	15.1538	13.7692	7	4.38462	19.5385	16.7692	5.84615	7.38462	7.23077	6.30769	10.2308	10.3846	13.1538	17.4615	21.8462	18.6923	16.3077	16.6154	9.76923	10.0769	23.3846	15.6154	7.23077	6.46154	6.46154	5.15385	11.3077	10.6154	12.6154	21.4615	50.06	32	19.7692	8	9.53846	5.15385	5.38462	8.84615	11.7692	10.1538	5.38462	5.07692	5	8	29.6154	26.0769	9.15385
80.501	17	18.7692	15.1538	17.9231	8.92308	6.15385	18.8462	18.1538	5.61538	7.69231	6.84615	6.69231	7.84615	9.69231	13.3846	23	20.4615	20.2308	14.9231	16.2308	9.76923	7.92308	20.6923	16.3846	8.84615	6.53846	7.07692	6.38462	9.61538	10.3077	14.2308	21.0769	80.07	34.3077	20.3077	7.92308	10.1538	3.76923	5.76923	8.46154	10.6154	9.38462	4.30769	4.92308	6.92308	6.69231	36.8462	27.3077	9.23077
110.511	14.6923	16.6923	13.0769	15.0769	8.69231	6.69231	20.7692	19.1538	6.15385	8	8	6.15385	8.53846	10.6154	14.7692	22	21.6154	18.7692	17.6154	15.1538	11	8	18.9231	16.4615	8.15385	6.76923	6.30769	6.15385	9.46154	11.4615	14.3077	19.6923	110.07	34.1538	18.9231	8.30769	9.61538	4.15385	5.92308	9.23077	10.9231	9.92308	4.92308	4.53846	5.61538	6.84615	36.5385	26.3846	9.46154
140.511	15.3846	16.8462	15.1538	13.6923	7.69231	6	21.1538	16.9231	6.38462	7.23077	8.30769	6	9.69231	10.2308	13.3846	22.1538	19.4615	20.0769	16.3846	13.8462	9.30769	8.38462	20.6923	17.2308	7.84615	7.69231	6.38462	4.76923	8.76923	11.1538	12.3077	20.0769	140.07	32.3846	18.9231	9.69231	8.69231	4.76923	5.23077	8.15385	10	9.23077	5.07692	4.23077	6.61538	7	40.7692	24.6154	8.92308
170.511	14.0769	15.3846	16.3077	15.2308	7.46154	6.84615	20.9231	18.2308	6	7.61538	7.46154	7.69231	7.30769	11.9231	16.3846	19.3077	19.1538	19.8462	17.3846	13.4615	10.1538	8.46154	20.8462	17.9231	7.84615	6.53846	5.23077	6	9.92308	10.6923	13	20.0769	170.07	33.6154	18.2308	7.07692	9.84615	5	6.15385	9.61538	12.5385	8.76923	5	4.07692	5.30769	5.69231	39.9231	31.2308	10.1538
200.511	14.5385	16.9231	13.2308	13.1538	9.84615	7.30769	21.4615	18.1538	6.76923	7.76923	9.46154	6.53846	9.92308	10.6923	16.4615	23.5385	20.5385	19.7692	16.2308	13.6923	8.84615	7.76923	20.9231	15.2308	8.69231	8.46154	6.61538	5.23077	9.46154	9.46154	13.0769	20.2308	200.07	33.0769	18.6154	8.38462	9.30769	5.53846	4.76923	10.0769	13.1538	9.30769	4.61538	5.53846	5.61538	6.15385	38.7692	24	8.84615
230.511	14.6154	17.3077	14.9231	15.3846	7.92308	7	21.7692	16.9231	6.92308	8.61538	7.46154	6.30769	8.23077	9.84615	15.2308	23.8462	18.5385	20	16.3846	13.6154	9	8.30769	19.6154	16.0769	7.69231	6.23077	6.46154	6.38462	8.15385	9.46154	13	19.2308	230.071	33.6154	19.9231	7.30769	10.3077	5.69231	5.61538	10.1538	12.3846	8.76923	5	5.30769	6.76923	6.15385	40.2308	26.2308	8.15385
260.511	14.3077	17.7692	14.3846	17.0769	8.38462	8.07692	19.4615	20.6154	7.23077	7.30769	7.76923	7.61538	9.30769	11.2308	18.4615	22.8462	17.3846	17.4615	17.0769	12.8462	8.69231	8.07692	21.5385	17.3846	7.53846	8.53846	6	6	8.23077	11.0769	13.0769	19.8462	260.071	31.1538	20.3077	8.84615	10.3077	4.53846	6.23077	8.84615	12.3077	9.84615	4.84615	4.23077	7.30769	6.23077	38.5385	27.2308	9.23077
290.512	14.5385	18.4615	18.9231	17.3846	8.84615	7.23077	23.3846	18.5385	7.76923	6.30769	8	7.46154	8.15385	10.2308	18.8462	22.6154	20.3077	18.3077	18.7692	13.1538	8.53846	6.76923	19.2308	14.5385	7.61538	7	5.76923	6.07692	8.23077	10.7692	13.3846	21.3846	290.071	36.8462	20.5385	8	9.53846	5.61538	5.61538	10.0769	12.6154	10.4615	5	4.92308	7.38462	5.53846	35.3077	23.8462	8.38462
320.522	15.5385	17	14.6154	17.1538	7.07692	7.92308	20.8462	18.0769	5.46154	6.92308	8.38462	6.69231	11.8462	8.61538	18.6923	22	19.4615	21.2308	17.6154	15.7692	10.0769	8.92308	20.3077	16.4615	7.92308	7.23077	4.76923	5.69231	10.2308	10.9231	14.6923	21.3077	320.081	32.3846	22.6154	9	9.07692	5.76923	6.07692	9.61538	11.3846	9.46154	5.38462	5.76923	6.30769	6.38462	35.1538	26.6923	8.46154
350.522	18.2308	17.0769	19.0769	15.5385	7.23077	7.84615	21.8462	20.2308	7	8.46154	7.76923	7.38462	10.6923	10.2308	19.3846	21.3846	17.6923	18.2308	16.0769	12	10.5385	7.46154	19	17.6154	7.15385	7.15385	6.23077	5.07692	9.15385	9.07692	14.7692	19.8462	350.081	32.1538	25	7.53846	9.46154	5.46154	5.15385	9.53846	10.1538	10.3846	4.69231	5.53846	6.15385	5.84615	30.8462	27.9231	9.76923
380.522	17.2308	19.6154	16.0769	15.8462	7.38462	8.53846	21.9231	18.4615	7.69231	8.76923	9	10.6923	10.6154	10.2308	16.9231	25.9231	15.8462	20.1538	15.3846	14.3077	8.23077	8.53846	19.6154	16.7692	6.92308	6.23077	6.38462	5.30769	8.84615	10.3077	13.3846	18.3846	380.081	36.4615	24	8.38462	10.8462	5.61538	5.84615	7.69231	11.7692	11.8462	5	5.46154	6.46154	6.46154	29.7692	25.7692	11.6154
410.522	18.4615	18.9231	15.6923	15.6923	8	8.15385	23.3077	17.6154	7.30769	8	9.69231	9.30769	10.3077	10.0769	18.5385	22.0769	17.5385	20.2308	14.6154	13.6923	7.92308	7.92308	19.8462	15.2308	7.61538	6.38462	5.23077	4.92308	9	9.92308	16.6154	19.4615	410.081	37.7692	26.0769	8.23077	10.3077	5	5.07692	9.92308	10.6923	11.6923	6.30769	4.69231	6.46154	7.46154	29.3077	26.0769	8.76923
440.522	18.5385	19.5385	16.0769	16.9231	7.92308	7.92308	22.2308	18.7692	7.61538	8.69231	8.30769	9.61538	11.0769	9.61538	20.6923	24.0769	16.4615	21.1538	17	15.2308	7.23077	9.30769	18	16.7692	8.15385	8.46154	5.15385	4.38462	9.07692	8.69231	14.2308	21	440.081	36.8462	26.5385	8.46154	9.61538	5.69231	6.61538	9.69231	11.1538	13.9231	5.23077	5.15385	6.30769	6.92308	29.1538	23	7.76923
470.522	19.1538	19.2308	15.3846	17.8462	8.23077	8.38462	20.8462	16	7.38462	8	10.6923	7.07692	10.7692	8.84615	18.8462	25.9231	15.9231	21.9231	16	12.7692	7.61538	9.53846	17.3077	15.9231	8.07692	8.15385	6.15385	5	8.46154	8.46154	16.9231	18	470.082	34.0769	26.3846	7.07692	9.92308	4.84615	4.61538	10.7692	9.76923	16.0769	6.15385	4.76923	6.30769	8.23077	27.9231	26.2308	7.76923
500.522	19.3077	17.7692	14.9231	15.1538	7.92308	9.76923	24.0769	17.2308	7.46154	8.15385	10.2308	9.69231	10.3077	9.76923	21.6154	19.7692	16.3846	20.0769	14.3077	12	8.92308	9	17.3846	16.3077	7.23077	8.30769	6.30769	5.07692	9.46154	8.15385	13.8462	20.2308	500.082	34.3077	28.3077	7.61538	9.30769	5.84615	5.84615	9.23077	10.6923	15.3077	5.76923	4.53846	7.53846	7.76923	30.6923	24.0769	8.69231
530.523	23.3077	20.0769	15.9231	17.6154	9	8.92308	21	19.5385	7.92308	9.23077	9.15385	9.15385	10.4615	8.69231	23.6154	22.8462	19.4615	20.1538	16.2308	12.9231	6.15385	7.69231	18.3846	17	6.92308	6.30769	6	4.76923	8.84615	9.23077	15.6923	18.5385	530.092	37.3077	29.1538	8.30769	11	7.15385	5.15385	8.23077	13.1538	13.6154	6.15385	5.23077	8.30769	7.84615	31.7692	25.1538	8.46154
560.523	21.8462	19.0769	17	14.1538	8.07692	8.69231	20.6923	18.3846	9.69231	8.76923	8.84615	9.07692	11.4615	10.3846	23	25.8462	17.7692	20.2308	13.6923	13.3846	7.53846	9.23077	17.8462	16.9231	8.30769	6.30769	4.84615	4.53846	8.30769	10.3077	14	17.4615	560.092	36.8462	31	6.84615	9.84615	7.30769	5.30769	10.8462	14.8462	14.6154	5.38462	4.46154	7.84615	7.30769	30.5385	26.0769	9.30769
590.533	22.6923	20.2308	14.6923	16.4615	7.69231	9	23.4615	17.2308	8.46154	8.46154	10.1538	7.76923	11.0769	9.61538	22.4615	27.6923	18.0769	19.3077	15.8462	14.7692	9.23077	8.38462	17.1538	16.9231	6.30769	5.53846	5.84615	4.38462	9.61538	8.76923	15.8462	18.3846	590.092	38.7692	33.3077	7.15385	8.23077	8.07692	4.92308	11.6923	13.8462	13.2308	5.84615	5.61538	6.69231	6.76923	32.8462	23.6923	8.30769
620.533	24.4615	17.9231	15.8462	17.3846	7.38462	8.69231	20.1538	19.4615	10.8462	7.84615	10.2308	9	12.2308	10	26.3846	28.9231	19.3846	19.7692	13.8462	14	6.76923	8.76923	18.5385	14.9231	5.84615	6.69231	4.61538	3.69231	7.84615	8.84615	15.4615	17.5385	620.092	36.1538	30.6923	6.92308	10.2308	7.46154	5.69231	8.38462	15.1538	15	6.07692	5	7.69231	7.69231	33.4615	23.3846	8.61538
650.533	21.4615	17.9231	11.9231	16.3077	8.38462	8	17	18.1538	9.92308	9.76923	8.46154	9	10.6154	10.3846	22.8462	24.3077	15.6923	20.8462	15	13.5385	7.46154	7.38462	16.4615	17.0769	6.84615	6.61538	5.15385	4.38462	7.30769	8.07692	15.3077	19	650.092	36.5385	28.5385	6.84615	9.92308	8.23077	5.30769	12	12.9231	14.9231	5.76923	5.38462	6.69231	7.92308	29.3077	26.2308	9.46154
680.533	23.2308	17.8462	14.6923	15.7692	7.30769	9.61538	19.9231	17.6154	10.4615	9.76923	10.6154	9.07692	12	9.76923	24.1538	27.2308	18.8462	19.1538	14.6923	13.8462	6.84615	8.76923	15.5385	14.3846	7.38462	7.61538	4.76923	4.07692	8.30769	8	17.7692	20.8462	680.092	34.2308	30.5385	6.76923	9.46154	7.76923	6.23077	9.84615	11.6923	13.7692	7.23077	5	7.92308	6.69231	28.9231	24.6154	9
710.533	23.7692	18.6923	12.9231	16.3077	9.38462	9.53846	20.4615	18.6923	9.84615	10.3846	7.61538	8.15385	9.53846	10.6923	21.9231	23.6154	16.3846	19.4615	14.6923	14.1538	8.23077	7.53846	16.6923	17	7.61538	5.92308	5.76923	4.38462	7.07692	9.15385	17.1538	19.6923	710.092	35.1538	32.3077	6.07692	10.6154	8.76923	4.53846	9.46154	16.4615	13.2308	5.92308	5.30769	7.69231	8.23077	27.4615	23.1538	10
740.533	21.9231	16.8462	14.3846	17.3846	8.76923	11.8462	19.6154	20	9.69231	9.84615	9.46154	7.76923	10.6154	11.0769	22.4615	24	19	18.5385	13.2308	13.6154	7.07692	9	17	17.8462	7.15385	7.07692	4.53846	3.76923	9.23077	7.69231	14.3077	18	740.093	36	34.7692	6.30769	9.46154	8.30769	5.69231	10.0769	12.5385	13.6923	5.84615	4.76923	8.69231	7.69231	28.2308	24.8462	9.61538
770.534	21.8462	17.2308	15.4615	15.2308	9.46154	9.84615	20	18.2308	9.38462	11.8462	10.1538	7.53846	12.0769	9.23077	25	24.6154	19.4615	18.5385	13.4615	12.8462	6	8.38462	18	18	8.30769	8	5.84615	3.84615	7.30769	7.84615	18.2308	20	770.093	36.8462	34.6923	7.53846	8.61538	8.07692	6.38462	11.3077	12.7692	15	6.23077	5.38462	7.84615	8.61538	26.7692	25.1538	8.61538
800.534	19.1538	19.1538	14.3077	15.2308	9.61538	9.84615	20.6154	23	12.4615	8.92308	9.38462	9.53846	9.69231	9.38462	24.2308	26.0769	19.2308	17.4615	13.3077	11.7692	7.15385	8.46154	14.7692	18.7692	8.53846	7.15385	5.23077	3.61538	7.69231	7.46154	14.9231	17.8462	800.103	37.5385	34.6154	6.53846	9.76923	8	7.07692	11.3077	18	14.1538	6	4.38462	8	8.15385	27.7692	24.6923	8.76923
830.544	21.9231	18.6154	14.1538	18.4615	10.9231	11.0769	20.2308	20.5385	9.30769	10	10.1538	7.38462	10.0769	8.92308	24	27.7692	17.8462	18.5385	14.2308	12.9231	7.61538	8.76923	16.4615	19.2308	8.23077	5.61538	6.53846	3.76923	6.46154	8.07692	13.7692	16.9231	830.103	33.7692	35.3077	8.46154	10.6154	7.46154	6.61538	10.3077	15.8462	14.4615	7.07692	6.76923	7.84615	7	28.6923	25.6154	7.30769
860.544	21.0769	18	12.6923	15	9.07692	9.84615	23.2308	22.3077	10.5385	11.6923	9.69231	6.61538	9.46154	9.76923	27.3077	26.3077	18.8462	14.7692	13.0769	12.3846	7	8.69231	15.4615	15.5385	7.30769	5.69231	5.46154	3.46154	8.07692	7.23077	15.8462	17.0769	860.103	38.1538	35.3077	9.30769	8.23077	8.92308	5.15385	11.0769	15.2308	15.9231	7.30769	3.92308	7.30769	8.84615	22.6154	24.3846	7.46154
890.544	22.7692	18.7692	14.6154	15.1538	12.5385	10.6154	25.3846	20.3846	12.3846	10.3077	7.92308	7.92308	10.8462	8.76923	28.5385	23.4615	16.2308	16.1538	13.6154	14.7692	8.92308	7.30769	17.0769	15.1538	7.30769	7.30769	7	3.53846	7.84615	8.76923	17.6923	16.3077	890.103	37.6154	38.2308	7.92308	8.76923	6.76923	6.53846	11.3077	16.1538	13.3077	6.46154	7.23077	8.46154	9	26.8462	22.8462	9.84615
[truncated: 21 more columns]

## Sheet: RR
REORGANIZED DATA FROM 3 FIELDS	CELL FRAP	CONTROL	CELL FRAP	CONTROL	CELL FRAP	CONTROL	CELL FRAP	CONTROL	CELL FRAP	CONTROL	CELL FRAP	CONTROL	CELL FRAP	CONTROL	CELL FRAP	CONTROL	CELL FRAP	CONTROL	CELL FRAP	CONTROL	CELL FRAP	CONTROL	CELL FRAP	CONTROL	CELL FRAP	CONTROL	CELL FRAP	CONTROL	CELL FRAP	CONTROL	CELL FRAP	CONTROL	CELL FRAP	CONTROL	CELL FRAP	CONTROL	CELL FRAP	CONTROL	CELL FRAP	CONTROL	CELL FRAP	CONTROL	CELL FRAP	CONTROL	CELL FRAP	CONTROL	CELL FRAP	CONTROL	CELL FRAP
Axis [s] - TIME	ROI1 []	ROI18 []	ROI2 []	ROI19 []	ROI3 []	ROI20 []	ROI4 []	ROI21 []	ROI5 []	ROI22 []	ROI6 []	ROI23 []	ROI7 []	ROI24 []	ROI8 []	ROI25 []	ROI9 []	ROI26 []	ROI10 []	ROI27 []	ROI11 []	ROI28 []	ROI12 []	ROI29 []	ROI13 []	ROI30 []	ROI14 []	ROI31 []	ROI15 []	ROI32 []	ROI16 []	ROI33 []	ROI17 []	ROI34 []	ROI1 []	ROI16 []	ROI2 []	ROI17 []	ROI3 []	ROI18 []	ROI4 []	ROI19 []	ROI5 []	ROI20 []	ROI6 []	ROI21 []	ROI7 []	ROI22 []	ROI8 []
0	187.375	191.625	167.875	185.75	255.125	264.625	590.25	539	650.5	616.25	169.125	119.375	414.375	452	331.125	338.25	363.875	378.75	513.625	489.75	227.375	313.375	407.875	380.25	860.625	814.25	887.75	844.625	317.375	304.125	164.625	167.125	227.125	207.875	527.75	539.375	694.125	714.625	240.875	251.625	586.5	525.875	310.125	305	156.375	172.375	280.25	306.5	430.625
5.17	180.625	186.5	203.25	180.5	240.375	264.25	502.5	525.125	616	636.5	151.125	155.875	406.5	396	386.25	364.375	375	389.75	493.75	509.25	233.875	232.375	351.25	377.375	817.375	864.625	811	806.125	319.75	369	168.875	167.125	228.375	218.375	524.125	511.25	690	682.875	231.5	225.75	538.25	607.375	338.125	328.625	148.75	150.75	286.625	276.375	407
15.13	121.875	168.5	103.625	173.75	153.5	245.375	316.875	451.75	340.5	593	91.75	148.375	245.375	309.75	236	250.625	238	359.75	296	381	138.5	240.375	186.75	334.75	561.375	800.375	653.25	873.25	188.25	300.75	122.25	167	127.625	194.25	330.625	445.625	475.5	669.625	153.5	169.625	286.5	517	258.625	338.75	84.625	170.625	137.75	261.25	279.5
20.37	128	152.625	147.875	166.125	211.625	235.875	415.75	481	413.625	595.5	100.375	131.875	304.5	365	249.375	353.75	266.25	434.625	362.125	471.5	169.875	196.625	227.25	390.875	574	765.25	649.25	755.75	218.75	311.125	140	171.375	126.625	182.25	389.625	465.375	526	735.625	188.625	191.625	398	555.75	285.875	345.125	94.25	183.875	169.125	259	289.125
50.37	168.5	168.625	153.75	217	207.875	225.5	487.375	469.625	524	607.375	101.375	167.875	328.375	345.25	318.75	280.625	328.125	375.875	437.75	381.75	196.25	232.5	235.75	400.25	659	824.125	821	774.75	294.75	269.5	168.125	154.625	214.25	213.5	422.25	456.5	598.375	663	184.375	214.75	505.25	552	300.375	326.125	119.625	144.875	212.875	232.75	381.75
80.37	162.625	174.125	158.375	191	224.125	230.375	477.25	495.5	515.25	632.5	101	138.5	347.5	305.5	343.875	347.5	320	378.625	416.25	423.875	208	226.375	216.125	328.125	680.75	798	708.875	762.625	286.25	328.5	156.125	146.375	198.25	180.625	419.375	437.75	660.5	659	190.375	201.5	581.125	572.625	291.25	357.625	105.125	156.25	182	213.25	403.125
110.37	173.75	165	165.125	178.75	234.375	224.125	578.625	503.25	565.125	613	114	130.5	342.5	331.125	337.875	281.125	381.25	389	409.75	428.25	220.625	256.625	254.125	329.5	687.625	746.25	746.25	668.875	265.625	323.25	160.5	143.875	172	172.125	429.375	406.5	606.75	668.25	208	222.25	496.75	558.125	301.25	322	92.75	161.25	184.875	240.75	391.5
140.37	194	159.75	150.625	212	239.5	232.375	512.625	483.875	573.375	550.625	112.375	135.375	339.25	317.375	355.125	317.875	375	409.75	499.375	444.125	245.5	239.5	255.375	297.625	686.25	801.125	752.625	770.25	308.25	333.625	138.75	169.875	182.625	184.25	403.5	339.875	654	697.875	203.25	223.5	504.375	525.375	284.375	278.625	94.125	158.75	242.5	240.875	423.875
170.371	191.5	151.375	181.375	182	239.375	223.375	550	460.625	591.25	615.75	118	155.625	330.125	285.375	388.625	299.75	380.625	442.625	422.625	432.125	226.75	239.75	231.125	309	692.625	728.25	715.375	668	316.25	312.125	166.375	149.75	179.375	146.75	401.875	395.75	571.75	678.125	226.75	215.5	526	534.625	288.5	303.625	98.125	141.25	282.75	234	427.375
200.371	186.75	151.25	181.5	180	228.25	234.125	473.625	511.75	570.375	551.125	114.75	158.25	331.375	332.25	373.75	297.875	429.625	399.875	435.375	462.125	203.875	254.375	244.125	315.5	716	684.25	772.375	769.125	317.25	311.625	169.5	150.25	191.75	180.125	392.125	400	597.875	604.375	169.5	228.375	542.875	471	312.25	288.375	102.375	174.375	268.625	237.875	377.625
230.371	186.5	196.125	201.5	167.875	245.625	197.875	474.25	435.625	563.625	538.5	119.75	136.75	310.75	340.25	357.875	278.875	378.5	386.5	466.125	460.25	193	254	232.875	313.25	729.75	730.125	681	732.125	344.5	301.75	161.25	166.875	194.125	185.5	441.5	412.875	572.5	658.125	159.5	191.875	536.125	563.375	321.25	313.25	95.375	170.625	309.625	220.875	427.875
260.371	186.125	261	196.75	200.125	248	215.5	461.875	463.5	509.5	489.125	122.25	128.75	335.5	342.875	415.75	262.125	386.125	380.875	431.25	507.75	192.375	272.75	263.75	307.25	664.25	654	597.375	692.75	320.75	304	156.75	140.375	179.5	171	433	428.125	592.125	665.125	180.125	231.25	552.75	511.75	264.125	325.25	97.125	140.625	326.875	217	431.5
290.381	177.375	297.75	196.375	184.375	243.25	244.5	432.25	447.375	510.125	528.75	117	157.5	303.75	308.125	415.5	287.625	438.75	359.875	471.25	447.5	201.125	261.375	251	309	695.375	662.5	619	673	341.75	335.5	165.25	164.875	203.75	213.875	334.625	411.5	608.375	600.25	197.5	209	474.25	560.125	269.25	282.875	119.25	140.875	304	217.375	477.5
320.381	163	255.625	166.5	162.875	245.5	232.625	373.5	462.25	515.75	495.125	128.25	126.25	322.25	353	459.375	327	369.875	410.5	387.875	451.25	206.625	235.75	283.125	318	648.5	694.25	580.875	732.625	307.75	319.25	176.5	154.875	206.25	203	336.625	439.5	592	587.5	167.25	210.625	531.75	602.25	260.5	301.625	106.875	146.5	313.625	214.875	423.625
350.381	171.875	263.625	165	146.125	205.875	215.25	366.75	451.75	510.375	489.375	149.625	136.375	296.625	320.5	377.875	319.375	391.625	361.125	414.875	443.25	183.5	231.5	236.625	303.375	723.875	646.5	516.375	712.25	296	267.5	179.625	157.125	180.25	158.125	395.625	375.375	586.5	590.625	251.625	206.5	526.25	528.625	278.75	306.625	126.5	166.75	296.375	233.625	414.875
380.381	157.75	287.75	209.5	135.75	235.625	224.375	368.125	503.5	544.625	561.375	137.375	137.125	343	323.875	400.5	343.5	392.125	351.875	372.5	475.75	216.75	246.375	300.125	322.375	746.5	682.5	586.25	616.25	291.75	270.875	203.5	142.625	181.625	179.625	398.75	384.125	594	575.875	208.75	228.25	500.125	551.25	284.875	287.25	97	148.125	313.125	223.375	410.875
410.382	150.125	280	184.125	144.75	249	235.875	356	444.875	567.625	494.625	178.75	154.25	334.5	294.375	471.5	323.375	396.875	396.625	430.75	472.25	213	247	295.75	362.875	758.875	708.5	574	656.75	283.75	300.875	203.5	170.25	193.25	173.125	420.125	380	560.25	595.25	188.75	225.625	461.75	533.875	313.125	264.625	115.375	157.25	361.25	231.25	396.5
440.382	165.125	234.25	201	152	245.75	217.875	396.375	500.5	585.25	499.75	149	128.25	337.125	263.875	434.25	281.5	406.125	343.375	402.75	456	185.5	212.5	330.25	306.75	770.625	617.5	612.375	638.875	313.75	294.875	199	161.75	196.875	164.625	374.25	365.5	625.5	547.375	215.375	228.125	454.5	501.5	332.25	323	125.75	129.125	343.5	274.875	395.625
470.382	198.125	253.75	213	120.375	219.375	212.75	385.625	485.125	662	501.25	148.75	118	364.875	311.875	418.625	278.5	406.875	348.625	360.25	417.25	232.875	213	306.125	281.75	762	614.125	609.625	653.25	314.875	316.25	160.5	194.625	208.625	172.875	385	385.25	581.75	568.875	230	232.5	452.75	465.5	354.875	256.25	115.625	165.125	312.625	238	378.875
500.392	165.875	216.375	208.125	131.875	269.125	207	364.375	485.875	693.375	518.625	117.375	148.125	342.375	299.75	385.625	257.375	431.125	346.5	406.875	405	230.375	227.25	323.375	292.25	763.75	643.25	615	602.25	301.375	277	203.25	157.625	185.625	164.625	341	397.125	605.75	526.5	247.5	234	491.25	507.875	328.875	318	110.625	138.5	368.625	262.375	371.625
530.392	174.5	223.125	214.625	129.5	219.25	234.5	393.375	496.375	680.25	508.625	159	149.25	334.25	289.875	410.375	248.625	454.625	310.25	416.875	454.625	208.625	202.25	294.25	284.5	804.25	658.125	659	653.25	286.125	314.5	223.5	185.25	150	146.125	351.875	330.875	663.25	439.5	181.875	198.375	534.5	502	318	286.25	131	140.75	367.75	253.75	421
560.392	182.375	184.125	179.875	138.125	233.625	232.625	391.25	435.625	589.875	450.375	152	140.625	338.875	303.375	378.75	281.25	489	327.375	421.25	421.875	225.125	218	337.75	310	842.75	651.75	737	695.625	252.625	312.375	179	170.125	172.625	140.5	351.25	320.875	655.25	420.625	216.25	219.75	507.375	467.5	291.25	287.5	123.5	135.5	336	291.875	367.375
590.392	176.25	174.375	219.125	122.25	242.375	204.375	411	497.875	592.875	486.625	140.625	151.25	331.875	258.375	394.125	290.125	493.25	362.625	421.75	427	190.5	204.25	307.875	314.25	867.25	605.5	794.375	641.125	254.375	313.375	194.25	176.875	207.25	116.125	421.625	352.5	635.125	425.75	215.625	223	530.625	519	286.5	294	124.75	131	356.875	267	381.375
620.392	177.25	149	216.625	134.5	257.75	222.75	355	448.125	584.75	502.625	144	139.5	321.875	216.25	408.875	285.375	557.25	344.125	416	462.75	208.375	195.25	325.625	316.5	880.375	595	864.875	759.25	290.75	326.5	212.125	152.75	185.75	123.25	360.375	330	665.75	398.125	208.125	219.5	495.125	475.25	313.875	278.875	125.875	162.625	364.625	262.375	380
650.392	150.75	130.5	182.5	119.125	204.875	228.625	366.375	488.875	648.125	535.5	131.5	123.375	344.5	288.5	367.875	267.875	534.75	338.5	410.125	411.375	205.625	185.75	331.875	326.375	779.875	592.125	828.125	712	293.375	292.25	180	156.25	155.625	124.125	374.75	342	683.5	379.375	212.25	195.375	542.875	541.125	324.25	257	102.5	139.625	349.75	313.5	327.5
680.393	164.375	115.25	183.75	153.375	215.125	190.5	389.625	485.75	682.625	508.875	153.75	136.25	370.625	241.125	438.375	290.25	463.875	376.75	387.875	411.625	226.25	203.75	359.625	287.75	857.5	599.625	860.5	743.625	295.625	258.375	193.375	173	171.25	126.625	387.5	317.875	693	366.75	220.5	180.375	504.25	465.625	290.375	226	108.75	114.25	396.625	280.25	396.5
710.393	170.75	145.75	201.75	125.75	230.25	235.5	366.625	478.75	611	488.375	160.5	141.625	374.125	216.375	415.5	265.125	459.125	339.125	401.5	415.875	194.25	195	334.875	284	945	620.375	925.375	683.5	254.75	320.375	203.75	160.625	165.25	108.875	361.25	309	669.125	344.75	201.125	188.875	569.75	503.125	311.25	248.5	113	141.875	401.75	275.5	371.75
740.393	178.125	141.75	194.75	134.375	209	213.125	450.25	488.5	595.5	518.625	144.125	159	337	204.625	381.625	246.875	452.625	380.5	449.125	403.875	203.625	186.75	352.25	307.875	936	606.875	853.875	747.125	309.75	306.25	221.25	153	155.25	92.875	337.75	307.625	683.75	316.5	199.375	192.25	542.25	485.5	334.75	252.75	106.75	148.75	410.25	268.5	354.75
770.403	184.375	152.375	201.125	112.125	204.625	233.5	420.75	523.125	660.75	565.625	159.875	124.625	319.875	162.25	380.375	254.125	462.375	337	462.875	412.25	178.25	209.125	323.875	278	934.5	627.375	832.125	736.125	282.875	312.25	211.375	181.625	171.625	98.25	382.5	307	659	342.75	158.125	158.5	696.625	464.75	284	300.125	127	145.25	411	305	324.125
800.403	167.25	143.375	210.75	117	235.5	210.5	440.5	530.375	594.375	512.25	153.25	129.5	347.25	160.875	390.375	351.875	450.25	348.375	435.125	331.5	220.5	205.125	328.125	292	981.25	582.125	790	747.875	310.625	322.375	191.875	174.375	148.75	97.75	324.25	248.375	671	363.75	183.625	197.375	668.375	480	338.875	275	112.75	137.375	452.625	269.375	383
830.403	188.625	143.75	229.75	103	226.875	231.625	463.75	547.5	595.375	502.125	157.125	142	389	141.75	379	259	517.75	344.25	415.75	337.375	195.625	199.25	341.5	319.5	1114.62	678.125	834.125	756.375	308.75	313.875	201.125	171.25	173.5	104.5	368.5	309.75	759.375	364.875	205.125	216.625	697.375	437.5	286.875	252.375	115.125	139.875	394	286.625	373.75
860.403	169	143.5	173.75	105.125	202.5	226.75	478.5	520.625	547.75	581.875	141.625	120.375	443.75	155.125	380.125	271	477.25	344.25	459	340.75	201.375	230.875	310.375	301.5	1059.5	616	854.125	827.25	294.875	322.25	213.5	145.25	169.125	98.25	372.5	325.875	688.125	338.375	225.125	182.625	633.25	485.75	320.125	239.875	95.75	161.75	398.125	244	360.5
890.403	195.625	132.375	185.5	118.5	208.375	218.375	525.625	543.25	473.875	497.5	168.5	130.875	395.625	141.375	376.625	308.875	491.25	354.375	448.25	350.875	196.25	237.625	412.75	278.25	1099	599.25	857.125	841.5	245	307.25	184.125	162.125	163.375	100.75	350	312.375	725.25	346.25	190.375	179.125	727.75	502.875	376.5	234.75	104.875	124.25	417.25	266.375	408
	0 = mean of signal before frap
Ploted data	Calculation of total # cells in all fields
	1	2	3	4	5	6	7	8	9	10	11	12	13	14	15	16	17	18	19	20	21	22	23	24	25	26	27	28	29	30	31	32	33	34	35	36
0	97.3223	101.331	93.6894	102.69	101.098	116.349	96.8013	102.099	96.1451	100.838	84.5167	100.198	99.9479	102.908	94.6518	99.7756	106.862	100.119	99.0429	98.9526	99.2499	102.308	94.4294	97.255	97.5116	97.0649	100.699	101.788	99.9522	99.8353	99.0103	104.515	#DIV/0!	#DIV/0!
15.13	72.3294	59.6403	62.5573	70.1439	57.4199	61.8366	79.2171	94.1646	66.1571	77.6903	57.6183	55.7879	70.139	74.8068	62.5935	73.2036	65.7014	74.1935	71.0099	90.4937	55.4159	76.3469	49.5971	52.7273	68.3165	57.0739	90.403	64.7555	62.3077	68.427	82.7617	73.84	#DIV/0!	#DIV/0!
20.37	83.8657	89.0143	89.7191	86.4345	69.4584	76.1137	83.4247	70.4947	61.2597	76.8028	86.3954	58.1388	75.0082	85.908	70.3094	81.6922	69.4787	83.7228	71.5038	98.4344	71.6149	82.8323	51.2576	65.2992	75.7367	73.1775	87.102	80.8149	70.6504	82.9721	114.328	134.711
50.37	99.9259	70.8525	92.184	103.78	86.2729	60.3872	95.1122	113.586	87.2963	114.669	84.4086	58.9007	79.9636	105.97	109.369	108.731	100.351	92.4973	90.2526	85.8556	91.5308	92.1043	82.5712	91.4608	104.125	99.773	91.895	98.5191	86.1351	97.6937	89.8669	123.464
80.37	93.3955	82.9188	97.287	96.3169	81.4625	72.9242	113.748	98.9568	84.5163	98.2011	91.8829	65.8667	85.307	92.952	87.1385	106.661	109.758	95.8024	100.228	94.4789	101.484	81.4401	67.28	85.3458	98.4132	95.8748	87.0191	99.4681	90.0943	100.705	120.455	118.807
110.37	105.303	92.3776	104.573	114.978	92.19	87.3563	103.435	120.187	98.0077	95.6801	85.9717	77.1244	92.1441	111.568	82.1732	111.555	99.9274	105.627	90.7969	93.5883	89.0034	93.5559	57.5194	76.7913	96.846	97.4253	97.0133	97.3058	94.8318	99.6603	108.365	121.546
140.37	121.44	71.0495	103.066	105.942	104.132	83.0102	106.892	111.718	91.5192	112.44	102.505	85.8043	85.6608	97.7118	92.3942	81.6777	99.118	118.72	93.7131	90.9396	96.0029	102.064	59.2913	100.675	110.853	125.726	114.508	116.342	89.0655	78.2979	100.251	115.565
170.371	126.507	99.6566	107.163	119.403	96.0211	75.8233	115.681	129.65	85.9927	97.8016	94.5777	74.7977	95.1081	107.092	101.322	111.102	122.232	101.548	84.3134	105.22	98.3867	95.0185	69.469	120.833	117.694	111.592	100.988	132.847	96.2855	73.75	104.112	157.848
200.371	123.471	100.833	97.4907	92.5501	103.493	72.5118	99.7366	125.472	107.44	94.2115	80.1474	77.3772	104.64	100.423	101.805	112.812	106.454	98.0312	98.9245	74.22	115.26	108.279	58.7097	112.927	103.035	111.501	134.212	166.596	90.8032	99.5565	97.1404	127.614
230.371	95.0924	120.03	124.131	108.867	104.666	87.5686	91.3299	128.328	97.9301	101.276	75.9843	74.3416	99.9486	93.0169	114.167	96.6292	104.65	106.933	86.9896	83.127	95.1631	102.554	55.8974	140.181	100.264	114.667	109.001	129.376	111.846	93.8791	73.3333	114.017
260.371	71.3123	98.3136	115.081	99.6494	104.166	94.9515	97.8491	158.608	101.378	84.9335	70.5316	85.8421	101.567	86.2324	105.51	111.665	104.971	101.139	89.0246	77.8919	108.012	81.2068	69.0667	150.634	124.262	118.941	115.862	108.816	101.316	73.1692	88.081	129.354
290.381	59.5718	106.508	99.4888	96.6192	96.4775	74.2857	98.5801	144.459	121.917	105.307	76.9488	81.2298	104.962	91.9762	101.863	100.227	95.2659	81.3183	101.354	94.4976	84.6686	95.1834	84.6495	139.85	139.213	116.308	104.054	136.322	121.98	82.9387	111.129	129.256
320.381	63.7653	102.226	105.535	80.8004	104.166	101.584	91.289	140.482	90.1035	85.9557	87.6458	89.033	93.4102	79.2868	96.3978	113.963	101.601	76.5927	100.766	79.4065	88.2939	86.3655	72.9522	145.957	114.108	114.875	127.426	162.024	112.062	62.3077	115.658	135.066
350.381	65.1968	112.917	95.6446	81.1843	104.291	109.716	92.5507	118.317	108.446	93.5984	79.2657	77.9975	111.968	72.4991	110.654	114.32	113.992	105.395	99.3016	121.852	99.5507	90.9091	75.8621	126.859	112.623	121.334	123.241	175.552	117.377	67.7296	116.471	171.398
380.381	54.8219	154.328	105.014	73.1132	97.0163	100.182	105.905	116.594	111.439	78.2974	87.9756	93.0981	109.377	95.1318	107.707	142.682	101.113	103.807	103.147	91.4567	90.7256	99.1732	65.4852	140.179	119.137	130.16	151.633	156.344	101.612	119.196	136.06	159.125
410.382	53.6161	127.202	105.564	80.0225	114.759	115.883	113.631	145.806	100.063	91.2123	86.2348	81.5019	107.11	87.4001	94.3083	119.53	111.625	110.559	94.1201	83.6565	86.4903	118.328	73.3704	156.216	112.602	90.3061	114.17	172.514	117.282	125.602	136.481	148.83
440.382	70.4909	132.237	112.794	79.1958	117.109	116.179	127.759	154.263	118.274	88.3224	87.2941	107.661	124.798	95.8521	106.401	123.029	119.59	102.394	114.273	94.411	90.6281	102.864	97.3863	124.966	121.871	100.252	114.957	129.93	115.685	134.447	131.738	183.09
470.382	78.0788	176.947	103.114	79.4898	132.07	126.059	116.994	150.314	116.708	86.3391	109.331	108.651	124.079	93.3219	99.5652	82.4663	120.68	99.9351	102.263	98.9247	97.261	138.488	70.0227	131.355	123.664	111.846	142.354	173.903	121.298	105.172	146.024	179.265
500.392	76.6609	157.82	130.012	74.9936	133.695	79.2405	114.22	149.83	124.423	100.463	101.375	110.65	118.733	102.117	108.8	128.945	112.756	85.8672	115.052	105.769	96.7266	103.42	79.8736	140.495	107.174	139.64	149.047	195.54	108.416	167.559	139.226	225.182
530.392	78.2073	165.734	93.4968	79.2496	133.743	106.533	115.308	165.058	146.535	91.6965	103.152	103.427	122.203	100.88	90.9777	120.648	102.652	106.347	150.91	91.6824	106.474	111.092	93.0728	144.926	131.357	116.767	143.18	180.66	103.336	151.521	160.562	208.479
560.392	99.0496	130.226	100.43	89.8135	130.974	108.089	111.702	134.667	149.37	99.8519	103.268	108.952	129.306	105.948	80.8723	105.217	122.865	109.466	155.78	98.4073	108.529	101.304	91.1439	115.118	97.4147	107.349	133.47	170.407	112.49	136.964	166.311	218.379
590.392	101.075	179.243	118.593	82.5508	121.834	92.9752	128.447	135.847	136.022	98.7705	93.2681	97.9714	143.229	123.903	81.1727	109.823	178.471	119.61	149.178	96.6928	102.24	97.449	95.229	133.661	101.194	91.4834	129.275	147.343	122.831	157.518	169.652	167.444
620.392	118.96	161.059	115.713	79.219	116.339	103.226	148.844	143.276	161.932	89.8974	106.722	102.883	147.962	113.912	89.0505	138.871	150.71	109.205	167.221	94.8178	104.182	112.55	77.402	138.971	105.556	110.767	154.705	150.836	120.532	134.917	168.723	194.038
650.392	115.517	153.2	89.6118	74.9425	121.032	106.586	119.411	137.331	157.976	99.6961	110.7	101.685	131.708	116.31	100.385	115.2	125.378	109.576	180.165	108.637	100.323	126.167	73.4109	111.563	104.134	104.067	134.799	183.809	120.652	105.498	197.709	190.244
680.393	142.625	119.804	112.927	80.211	134.144	112.844	153.707	151.034	123.125	94.2302	111.043	124.978	143.006	115.717	114.417	111.777	135.242	121.903	188.957	122.245	108.295	128.485	95.186	141.525	116.19	124.094	145.52	187.969	126.348	166.601	164.924	239.508
710.393	117.153	160.437	97.7707	76.5796	125.109	113.327	172.906	156.719	135.385	96.5434	99.6154	117.914	152.327	135.388	79.5162	126.848	151.78	116.909	194.09	106.486	113.242	125.252	79.6476	145.826	115.945	101.763	125.922	150.213	98.667	131.488	161.134	249.564
740.393	125.661	144.93	98.0645	92.1699	114.823	90.6447	164.692	154.582	118.955	111.204	109.036	114.413	154.233	114.288	101.143	144.608	167.16	109.793	216.035	103.706	111.689	132.443	71.7647	152.793	104.262	103.581	114.79	171.802	112.191	136.204	189.872	208.558
770.403	121.001	179.376	87.6338	80.4301	116.818	128.285	197.149	149.68	137.203	112.28	85.2361	116.502	148.954	113.041	90.5925	116.38	174.682	124.593	192.268	99.7634	149.892	94.6272	87.4355	134.754	97.2253	113.209	118.962	191.412	107.162	177.312	146.616	193.519
800.403	116.652	180.128	111.876	83.0544	116.032	118.34	215.851	110.941	129.243	131.259	107.495	112.372	168.563	105.633	96.3552	110.036	152.174	130.549	184.467	93.0336	139.245	123.227	82.0746	168.028	132.756	121.145	102.218	180.976	103.507	184.759	210.553	281.429
830.403	131.217	223.058	97.9493	84.7032	118.571	110.651	274.427	146.332	150.399	123.231	98.1807	106.886	164.369	110.279	98.3672	117.445	166.029	118.967	208.119	94.6913	159.4	113.67	82.3056	137.462	129.213	165.812	112.478	219.102	117.659	135.508	167.451	269.559
860.403	117.77	165.279	89.3054	91.9088	94.1353	117.653	286.06	140.268	138.635	134.703	87.2225	102.944	171.997	103.249	91.505	146.988	172.137	114.308	203.362	123.272	130.365	133.455	59.1963	163.166	109.45	115.537	122.007	188.571	105.523	147.526	205.745	220.592
890.403	147.781	156.54	95.4207	96.7556	95.2513	128.749	279.841	121.934	138.624	127.752	82.5881	148.338	183.396	101.857	79.7396	113.57	162.159	112.045	209.458	106.281	144.718	160.383	84.4064	156.64	141.115	117.723	113.029	205.077	121.493	162.791	168.928	218.458
Channel,001 - GFP	RAW DATA imported LAS AF software																																		Channel,001
Axis [s]	ROI1 []	ROI2 []	ROI3 []	ROI4 []	ROI5 []	ROI6 []	ROI7 []	ROI8 []	ROI9 []	ROI10 []	ROI11 []	ROI12 []	ROI13 []	ROI14 []	ROI15 []	ROI16 []	ROI17 []	ROI18 []	ROI19 []	ROI20 []	ROI21 []	ROI22 []	ROI23 []	ROI24 []	ROI25 []	ROI26 []	ROI27 []	ROI28 []	ROI29 []	ROI30 []	ROI31 []	ROI32 []	ROI33 []	ROI34 []	Axis [s]	ROI1 []	ROI2 []	ROI3 []	ROI4 []	ROI5 []	ROI6 []	ROI7 []	ROI8 []	ROI9 []	ROI10 []	ROI11 []	ROI12 []	ROI13 []	ROI14 []
0	187.375	167.875	255.125	590.25	650.5	169.125	414.375	331.125	363.875	513.625	227.375	407.875	860.625	887.75	317.375	164.625	227.125	191.625	185.75	264.625	539	616.25	119.375	452	338.25	378.75	489.75	313.375	380.25	814.25	844.625	304.125	167.125	207.875	0	527.75	694.125	240.875	586.5	310.125	156.375	280.25	430.625	284.375	502	316.875	669.875	191.625	329.5
5.17	180.625	203.25	240.375	502.5	616	151.125	406.5	386.25	375	493.75	233.875	351.25	817.375	811	319.75	168.875	228.375	186.5	180.5	264.25	525.125	636.5	155.875	396	364.375	389.75	509.25	232.375	377.375	864.625	806.125	369	167.125	218.375	5.16	524.125	690	231.5	538.25	338.125	148.75	286.625	407	244.75	506.25	302.375	637.375	187.125	320.75
15.13	121.875	103.625	153.5	316.875	340.5	91.75	245.375	236	238	296	138.5	186.75	561.375	653.25	188.25	122.25	127.625	168.5	173.75	245.375	451.75	593	148.375	309.75	250.625	359.75	381	240.375	334.75	800.375	873.25	300.75	167	194.25	15.41	330.625	475.5	153.5	286.5	258.625	84.625	137.75	279.5	147.75	389.75	192	405	150.625	229.25
20.37	128	147.875	211.625	415.75	413.625	100.375	304.5	249.375	266.25	362.125	169.875	227.25	574	649.25	218.75	140	126.625	152.625	166.125	235.875	481	595.5	131.875	365	353.75	434.625	471.5	196.625	390.875	765.25	755.75	311.125	171.375	182.25	20.64	389.625	526	188.625	398	285.875	94.25	169.125	289.125	164.375	400.125	238	426.375	167.5	289.25
50.37	168.5	153.75	207.875	487.375	524	101.375	328.375	318.75	328.125	437.75	196.25	235.75	659	821	294.75	168.125	214.25	168.625	217	225.5	469.625	607.375	167.875	345.25	280.625	375.875	381.75	232.5	400.25	824.125	774.75	269.5	154.625	213.5	50.65	422.25	598.375	184.375	505.25	300.375	119.625	212.875	381.75	219.75	394	299.375	511.75	206.5	303.75
80.37	162.625	158.375	224.125	477.25	515.25	101	347.5	343.875	320	416.25	208	216.125	680.75	708.875	286.25	156.125	198.25	174.125	191	230.375	495.5	632.5	138.5	305.5	347.5	378.625	423.875	226.375	328.125	798	762.625	328.5	146.375	180.625	80.65	419.375	660.5	190.375	581.125	291.25	105.125	182	403.125	252.75	370.375	280.5	501.375	178.5	364.375
110.37	173.75	165.125	234.375	578.625	565.125	114	342.5	337.875	381.25	409.75	220.625	254.125	687.625	746.25	265.625	160.5	172	165	178.75	224.125	503.25	613	130.5	331.125	281.125	389	428.25	256.625	329.5	746.25	668.875	323.25	143.875	172.125	110.65	429.375	606.75	208	496.75	301.25	92.75	184.875	391.5	236.5	454.75	270.875	539	183.375	323.875
140.37	194	150.625	239.5	512.625	573.375	112.375	339.25	355.125	375	499.375	245.5	255.375	686.25	752.625	308.25	138.75	182.625	159.75	212	232.375	483.875	550.625	135.375	317.375	317.875	409.75	444.125	239.5	297.625	801.125	770.25	333.625	169.875	184.25	140.65	403.5	654	203.25	504.375	284.375	94.125	242.5	423.875	238.25	423.25	306.125	525.375	184	300
170.371	191.5	181.375	239.375	550	591.25	118	330.125	388.625	380.625	422.625	226.75	231.125	692.625	715.375	316.25	166.375	179.375	151.375	182	223.375	460.625	615.75	155.625	285.375	299.75	442.625	432.125	239.75	309	728.25	668	312.125	149.75	146.75	170.65	401.875	571.75	226.75	526	288.5	98.125	282.75	427.375	261.125	408.75	352.875	537.875	147.5	329.125
200.371	186.75	181.5	228.25	473.625	570.375	114.75	331.375	373.75	429.625	435.375	203.875	244.125	716	772.375	317.25	169.5	191.75	151.25	180	234.125	511.75	551.125	158.25	332.25	297.875	399.875	462.125	254.375	315.5	684.25	769.125	311.625	150.25	180.125	200.65	392.125	597.875	169.5	542.875	312.25	102.375	268.625	377.625	226.625	521.75	395.25	555.375	168.375	280.25
230.371	186.5	201.5	245.625	474.25	563.625	119.75	310.75	357.875	378.5	466.125	193	232.875	729.75	681	344.5	161.25	194.125	196.125	167.875	197.875	435.625	538.5	136.75	340.25	278.875	386.5	460.25	254	313.25	730.125	732.125	301.75	166.875	185.5	230.65	441.5	572.5	159.5	536.125	321.25	95.375	309.625	427.875	204.25	442	367.75	574.75	159.125	246.125
260.371	186.125	196.75	248	461.875	509.5	122.25	335.5	415.75	386.125	431.25	192.375	263.75	664.25	597.375	320.75	156.75	179.5	261	200.125	215.5	463.5	489.125	128.75	342.875	262.125	380.875	507.75	272.75	307.25	654	692.75	304	140.375	171	260.651	433	592.125	180.125	552.75	264.125	97.125	326.875	431.5	233.125	480.25	337.875	567.875	141.125	277.125
290.381	177.375	196.375	243.25	432.25	510.125	117	303.75	415.5	438.75	471.25	201.125	251	695.375	619	341.75	165.25	203.75	297.75	184.375	244.5	447.375	528.75	157.5	308.125	287.625	359.875	447.5	261.375	309	662.5	673	335.5	164.875	213.875	290.651	334.625	608.375	197.5	474.25	269.25	119.25	304	477.5	243.375	417.125	404.875	623.625	170.75	348.25
320.381	163	166.5	245.5	373.5	515.75	128.25	322.25	459.375	369.875	387.875	206.625	283.125	648.5	580.875	307.75	176.5	206.25	255.625	162.875	232.625	462.25	495.125	126.25	353	327	410.5	451.25	235.75	318	694.25	732.625	319.25	154.875	203	320.661	336.625	592	167.25	531.75	260.5	106.875	313.625	423.625	219.125	425.125	404.25	579.5	131.625	374.875
350.381	171.875	165	205.875	366.75	510.375	149.625	296.625	377.875	391.625	414.875	183.5	236.625	723.875	516.375	296	179.625	180.25	263.625	146.125	215.25	451.75	489.375	136.375	320.5	319.375	361.125	443.25	231.5	303.375	646.5	712.25	267.5	157.125	158.125	350.661	395.625	586.5	251.625	526.25	278.75	126.5	296.375	414.875	263.75	440.125	427.25	568.25	132.75	358.875
380.381	157.75	209.5	235.625	368.125	544.625	137.375	343	400.5	392.125	372.5	216.75	300.125	746.5	586.25	291.75	203.5	181.625	287.75	135.75	224.375	503.5	561.375	137.125	323.875	343.5	351.875	475.75	246.375	322.375	682.5	616.25	270.875	142.625	179.625	380.661	398.75	594	208.75	500.125	284.875	97	313.125	410.875	244.375	475.75	415.875	512.125	163	417.875
410.382	150.125	184.125	249	356	567.625	178.75	334.5	471.5	396.875	430.75	213	295.75	758.875	574	283.75	203.5	193.25	280	144.75	235.875	444.875	494.625	154.25	294.375	323.375	396.625	472.25	247	362.875	708.5	656.75	300.875	170.25	173.125	410.661	420.125	560.25	188.75	461.75	313.125	115.375	361.25	396.5	177	424	431.5	576	176	424.625
440.382	165.125	201	245.75	396.375	585.25	149	337.125	434.25	406.125	402.75	185.5	330.25	770.625	612.375	313.75	199	196.875	234.25	152	217.875	500.5	499.75	128.25	263.875	281.5	343.375	456	212.5	306.75	617.5	638.875	294.875	161.75	164.625	440.661	374.25	625.5	215.375	454.5	332.25	125.75	343.5	395.625	199.125	434.25	392.875	569.75	176.125	457.625
470.382	198.125	213	219.375	385.625	662	148.75	364.875	418.625	406.875	360.25	232.875	306.125	762	609.625	314.875	160.5	208.625	253.75	120.375	212.75	485.125	501.25	118	311.875	278.5	348.625	417.25	213	281.75	614.125	653.25	316.25	194.625	172.875	470.661	385	581.75	230	452.75	354.875	115.625	312.625	378.875	203	459.625	376.5	570.25	198.25	475.125
500.392	165.875	208.125	269.125	364.375	693.375	117.375	342.375	385.625	431.125	406.875	230.375	323.375	763.75	615	301.375	203.25	185.625	216.375	131.875	207	485.875	518.625	148.125	299.75	257.375	346.5	405	227.25	292.25	643.25	602.25	277	157.625	164.625	500.662	341	605.75	247.5	491.25	328.875	110.625	368.625	371.625	251.875	518.125	465.875	531.375	195.625	467.625
530.392	174.5	214.625	219.25	393.375	680.25	159	334.25	410.375	454.625	416.875	208.625	294.25	804.25	659	286.125	223.5	150	223.125	129.5	234.5	496.375	508.625	149.25	289.875	248.625	310.25	454.625	202.25	284.5	658.125	653.25	314.5	185.25	146.125	530.662	351.875	663.25	181.875	534.5	318	131	367.75	421	218.5	514.375	451.875	530.5	211.75	499.75
560.392	182.375	179.875	233.625	391.25	589.875	152	338.875	378.75	489	421.25	225.125	337.75	842.75	737	252.625	179	172.625	184.125	138.125	232.625	435.625	450.375	140.625	303.375	281.25	327.375	421.875	218	310	651.75	695.625	312.375	170.125	140.5	560.672	351.25	655.25	216.25	507.375	291.25	123.5	336	367.375	204.5	490	387.25	538.125	199.625	525.75
590.392	176.25	219.125	242.375	411	592.875	140.625	331.875	394.125	493.25	421.75	190.5	307.875	867.25	794.375	254.375	194.25	207.25	174.375	122.25	204.375	497.875	486.625	151.25	258.375	290.125	362.625	427	204.25	314.25	605.5	641.125	313.375	176.875	116.125	590.672	421.625	635.125	215.625	530.625	286.5	124.75	356.875	381.375	202.75	472.5	415.875	538	195.125	487.75
620.392	177.25	216.625	257.75	355	584.75	144	321.875	408.875	557.25	416	208.375	325.625	880.375	864.875	290.75	212.125	185.75	149	134.5	222.75	448.125	502.625	139.5	216.25	285.375	344.125	462.75	195.25	316.5	595	759.25	326.5	152.75	123.25	620.672	360.375	665.75	208.125	495.125	313.875	125.875	364.625	380	214.75	472.625	428.75	498.25	202.375	488.875
650.392	150.75	182.5	204.875	366.375	648.125	131.5	344.5	367.875	534.75	410.125	205.625	331.875	779.875	828.125	293.375	180	155.625	130.5	119.125	228.625	488.875	535.5	123.375	288.5	267.875	338.5	411.375	185.75	326.375	592.125	712	292.25	156.25	124.125	650.672	374.75	683.5	212.25	542.875	324.25	102.5	349.75	327.5	211.125	482.75	442.75	564.5	189.5	528.625
680.393	164.375	183.75	215.125	389.625	682.625	153.75	370.625	438.375	463.875	387.875	226.25	359.625	857.5	860.5	295.625	193.375	171.25	115.25	153.375	190.5	485.75	508.875	136.25	241.125	290.25	376.75	411.625	203.75	287.75	599.625	743.625	258.375	173	126.625	680.672	387.5	693	220.5	504.25	290.375	108.75	396.625	396.5	218.25	452.75	451.125	541.875	212	489
710.393	170.75	201.75	230.25	366.625	611	160.5	374.125	415.5	459.125	401.5	194.25	334.875	945	925.375	254.75	203.75	165.25	145.75	125.75	235.5	478.75	488.375	141.625	216.375	265.125	339.125	415.875	195	284	620.375	683.5	320.375	160.625	108.875	710.672	361.25	669.125	201.125	569.75	311.25	113	401.75	371.75	187.625	443.875	397.125	527.375	198.875	486.625
740.393	178.125	194.75	209	450.25	595.5	144.125	337	381.625	452.625	449.125	203.625	352.25	936	853.875	309.75	221.25	155.25	141.75	134.375	213.125	488.5	518.625	159	204.625	246.875	380.5	403.875	186.75	307.875	606.875	747.125	306.25	153	92.875	740.673	337.75	683.75	199.375	542.25	334.75	106.75	410.25	354.75	191.625	479.25	451.625	538.375	203.625	480.375
770.403	184.375	201.125	204.625	420.75	660.75	159.875	319.875	380.375	462.375	462.875	178.25	323.875	934.5	832.125	282.875	211.375	171.625	152.375	112.125	233.5	523.125	565.625	124.625	162.25	254.125	337	412.25	209.125	278	627.375	736.125	312.25	181.625	98.25	770.673	382.5	659	158.125	696.625	284	127	411	324.125	182.125	495.625	493.125	542.375	232.5	454.875
800.403	167.25	210.75	235.5	440.5	594.375	153.25	347.25	390.375	450.25	435.125	220.5	328.125	981.25	790	310.625	191.875	148.75	143.375	117	210.5	530.375	512.25	129.5	160.875	351.875	348.375	331.5	205.125	292	582.125	747.875	322.375	174.375	97.75	800.683	324.25	671	183.625	668.375	338.875	112.75	452.625	383	190.5	409	454.25	553.375	210.625	523.75
830.403	188.625	229.75	226.875	463.75	595.375	157.125	389	379	517.75	415.75	195.625	341.5	1114.62	834.125	308.75	201.125	173.5	143.75	103	231.625	547.5	502.125	142	141.75	259	344.25	337.375	199.25	319.5	678.125	756.375	313.875	171.25	104.5	830.683	368.5	759.375	205.125	697.375	286.875	115.125	394	373.75	242.5	468.75	500.375	558	199.875	462.375
860.403	169	173.75	202.5	478.5	547.75	141.625	443.75	380.125	477.25	459	201.375	310.375	1059.5	854.125	294.875	213.5	169.125	143.5	105.125	226.75	520.625	581.875	120.375	155.125	271	344.25	340.75	230.875	301.5	616	827.25	322.25	145.25	98.25	860.683	372.5	688.125	225.125	633.25	320.125	95.75	398.125	360.5	189.625	463.625	478.5	515.875	197.5	528.25
890.403	195.625	185.5	208.375	525.625	473.875	168.5	395.625	376.625	491.25	448.25	196.25	412.75	1099	857.125	245	184.125	163.375	132.375	118.5	218.375	543.25	497.5	130.875	141.375	308.875	354.375	350.875	237.625	278.25	599.25	841.5	307.25	162.125	100.75	890.683	350	725.25	190.375	727.75	376.5	104.875	417.25	408	192.625	464.125	464.5	537	183.75	541.625
[truncated: 16 more columns]

## Sheet: RR2
REORGANIZED DATA FROM 3 FIELDS	CELL FRAP	CONTROL	CELL FRAP	CONTROL	CELL FRAP	CONTROL	CELL FRAP	CONTROL	CELL FRAP	CONTROL	CELL FRAP	CONTROL	CELL FRAP	CONTROL	CELL FRAP	CONTROL	CELL FRAP	CONTROL	CELL FRAP	CONTROL	CELL FRAP	CONTROL	CELL FRAP	CONTROL	CELL FRAP	CONTROL	CELL FRAP	CONTROL	CELL FRAP	CONTROL	CELL FRAP	CONTROL	CELL FRAP	CONTROL	CELL FRAP	CONTROL	CELL FRAP	CONTROL	CELL FRAP	CONTROL	CELL FRAP	CONTROL	CELL FRAP	CONTROL	CELL FRAP	CONTROL	CELL FRAP	CONTROL	CELL FRAP
Axis [s] - TIME	ROI1 []	ROI13 []	ROI2 []	ROI14 []	ROI3 []	ROI15 []	ROI4 []	ROI16 []	ROI5 []	ROI17 []	ROI6 []	ROI18 []	ROI7 []	ROI19 []	ROI8 []	ROI20 []	ROI9 []	ROI21 []	ROI10 []	ROI22 []	ROI11 []	ROI23 []	ROI12 []	ROI24 []	ROI1 []	ROI14 []	ROI2 []	ROI15 []	ROI3 []	ROI16 []	ROI4 []	ROI17 []	ROI5 []	ROI18 []	ROI6 []	ROI19 []	ROI7 []	ROI20 []	ROI8 []	ROI21 []	ROI9 []	ROI22 []	ROI10 []	ROI23 []	ROI11 []	ROI24 []	ROI12 []	ROI25 []	ROI13 []
0	9403.5	8907.6	1705.2	1633.2	16027.7	15978.9	3876.3	3281.9	11280.5	11350.3	3865.1	3590.1	1495.6	1488.8	2024.4	2075.1	7855.3	7558.8	10930.5	10720.3	2611.6	2751.4	3848.3	3966.4	9902.7	10034.9	1723.8	1705.5	1705.2	1738.7	16644.4	17084.8	7979.3	7729.3	1110.3	1097.1	2571	2691.3	999.6	1091.1	13445.9	12658.7	1355	1406.3	1693.1	1456	1998.4	1824.7	2831.8
5.16	9859.2	10126.5	1556.7	1567.8	15918.2	16190.4	2989.7	4014.7	10415.6	11085.8	3496.7	3439	1946	1706.2	2198	2450.2	8369.3	7248.5	10860.7	10179.7	3075.9	2560.3	3524.7	3745.5	9719.4	9681.2	1466.8	1544.5	2018	1858	15979.6	15815.1	8260.6	8510.7	1153.1	1423.8	3176.7	2904.6	1240.5	916.4	12519.9	12835.2	1653.2	1381.3	1766.9	1873.7	1812.2	1778.5	2296.8
13.5	6603.2	8800.6	1186.7	1291.8	11143.6	14870.5	2498.7	3280.3	6964.2	9711.4	3239.7	2957.1	1214.5	1686.7	1496.1	2407	5666.5	6272.2	8437.3	10750.8	2050.2	2527.7	2618.2	4069.9	6616.2	8550	1189	1569.3	1578.8	1453.3	11175.5	17055.4	6625.4	8207.3	964.7	1338.8	2523.6	2606.5	1030.4	790	11099.2	11417.2	996.2	1357.1	1280.9	1831.9	1408.9	1693.4	1777.3
18.73	7303.7	9379.6	1110.6	1674.2	12979.6	14968.3	3017.6	3733.7	8375.6	10691.6	3665.2	3286	1503.5	1776.1	1236.5	1759.1	5880.3	5903.4	8844.7	10563.7	2635.7	2623.3	3179.1	3390.7	7417.4	9295.7	1865.7	1847.9	1510.9	1364.9	11132.9	18347.6	7009.9	7748.2	1033.9	920.2	2780.3	2589.2	997.7	903.6	11119.7	11168.5	1245.9	1522.7	1514	1626.7	1985.2	1720.3	1954
48.74	7778.7	9569.8	1534.4	1816.8	14746.8	15511.1	3399.7	3545.3	9155.2	9600.6	3395.4	3644.6	1273.1	1833.2	1521.2	2584	7462.7	5585.1	9589.6	10540.7	3232.7	2891.7	3163.7	3848.5	8748.4	8790	1530.6	1572.4	1881.2	1512.2	13051.8	16907.2	7099.8	7562.8	1369.9	1118.5	2731.1	2568.7	987.1	1043.3	11874.1	11545.6	1429.2	1670.1	1580.8	1490.8	2007.3	1791.5	2007.4
78.741	8295.6	8971.9	1415.6	1439.7	15266.5	14227.9	3050.8	3405	9392	9824.2	3551.7	4311.1	1413.3	1777.1	1775.5	2649.1	7173.8	6319.7	10695.4	9485.5	3471.5	2823.8	3501.6	3851.5	8639.6	9053.2	1606.4	1716.2	2454.3	1567.3	16044.6	14438.6	8487.1	6849.2	1183.2	1347.5	2671.6	2562.3	833.2	886.2	11038.2	11253.8	1781	1276.8	1580.5	1517	2206.4	1978.8	2141.7
108.741	7732.5	9338.1	1815.1	1459.8	15203.3	14167.3	3314.2	3278.1	10068	8828.4	3738.8	3833.6	1700	1638.1	1616.5	2024.3	7017	6145.3	10486.6	9966.9	3015	2815.8	3669.1	3838	8854.2	7898.4	1280.2	1465	2395.4	1796.2	16110.6	15024.2	7830.3	6933.9	1605.2	1057.9	2839.7	2559.9	1021.1	917.4	11876.1	10970	1263.1	1389	1352.5	1207.1	2641.4	1907.4	2304.8
138.741	8420.8	8629.4	1822.2	1812.9	15506	14978.2	3361	3171.9	9371.8	10224.9	3700.6	3571.2	1574.7	1420.2	2131	1777.3	6864.3	5946.1	9825.6	9378	2902.5	2930.6	3160.8	3679.4	8868.2	8652.3	1534.3	1442.7	1722.8	1677.8	17306.5	14234.4	8378.2	7566	1460.3	1096.1	2555.6	2605.4	1127.3	831.5	10739	10687.4	1299.8	1259.4	1782.2	1309.5	2441.9	2140.5	2495.8
168.741	8135.9	8430.9	1857.7	1547.9	16147.7	15151.9	3455.7	2895.9	9140.4	9301.4	4060.1	3433.8	1519.7	1675.1	1957.5	1988.8	7504	5187.3	10790.7	8962.6	3025.9	3005.4	3265	4444.1	9498.2	8542.6	1651.9	1805.4	2033.7	1548.2	15188.3	14112.4	7941.3	7612.8	1853.9	1043.7	2830	2457	1095.3	1149.1	10384.2	9992.7	1333.6	1406.6	1563.2	1560.9	2361.2	2087.8	2320.9
198.741	9321	8604.4	2190.4	1416.8	15494	14957.6	3413.8	3539.1	9571	9613.6	3632.5	2991.2	1353.2	1353.7	2313.8	1694.7	8910.7	5212.6	9919.2	8067.4	2992.6	3009.6	3885.7	3961.2	10430.3	8477.5	1513.4	1936.8	2118.9	1464.4	17651.4	11029.9	8686.6	6999.6	1757	945.5	3313.3	2860.1	1059	928.8	11327.7	8914.8	1306.8	1212.2	1579.3	1868.4	2896.7	1688.7	2568.3
228.741	9249.3	7914.7	1726.8	1277.8	15797.6	15761.6	3993.5	3247.5	9976	10119	3715	3891.4	1320.9	1364.9	1895.5	1765.5	7186.7	5379.9	10302.8	9240.1	4243	2358	3417.5	4286	9358.7	8823.6	1670.6	1592.1	1792.9	1686.2	18514.7	11742.1	8280.6	7318.3	1337.1	1289.9	3208.6	2412.3	1063.5	1025.1	12301.5	8023.3	1447.6	1198	1543.2	1405.9	3028.9	1805.4	2766
258.741	9776.1	7058.1	1857.2	1307.4	16367.8	13424.3	4041.2	3059.6	9186.1	10719.1	3380.7	4206.9	1507.6	1490.9	1805.3	1640.6	6961.7	5458.8	9601.2	8971.9	3807.2	2492.5	3908.9	4526.8	10284.2	8892.3	1348.1	1630.9	2352.5	1579	18447.6	12953.1	9124.1	7536.1	1798.9	1100.3	3226.7	2723.8	1004	968.7	11284	7897.7	1742.8	920.1	1947.8	1600.4	2958.2	2073.3	2784.5
288.751	10334.8	6186.4	2020.3	1600.5	16539.2	13684.7	4471.4	3051.6	9019.1	10336	3519.5	4228	1491.2	1355.2	1981	1670.4	7473.8	5379.1	9587.6	9017.8	3633.6	2815.6	3851	3870.2	10505.5	8170.1	1893.3	1475.6	2152.2	1579.6	17871.7	15533	9083.8	7053.3	1826.7	1215.7	2767.7	2595.1	1034.8	942.3	10469.1	7541.3	1536.1	1079.4	1628	1578.6	2748.7	2461.2	3120.7
318.751	11019.5	5367.2	2233	1108.1	16746.1	13309.7	3764.8	3207.1	9234.9	9288.2	3075.5	3644.5	1497.4	1062.6	2135.9	1588.7	7736	4816.1	10165.3	9013.2	4409.3	2047.5	3771.9	4034.7	9935.5	8746.4	1731.1	1538.2	2277.7	1454	19095.2	15992.1	9141.4	6992.8	2017.6	844.1	2909.8	2899.7	1225.8	1192.8	12603.4	7115.1	1596.7	1129.4	1937	1688	3276.8	2174	2809.9
348.752	12069.5	5701.3	1818.6	1760.5	16821	14952	3976.7	3020.4	9838.3	9713.3	3437.1	3834.2	1605.5	1414	2518.1	1358.4	7207.4	4664.2	10911.8	7828.9	3450.7	2217.7	3638.8	3644.9	9387.4	8264.2	1882	1298.1	2241.6	1514.3	19591.2	17015.2	9426	6974.6	1776.3	1061.7	2771.9	2462.6	1417.7	1041.1	10994.1	6541.1	1769.2	1074.5	1855	1707.4	3119.5	2166.6	2634.8
378.752	11187.7	6277.9	2532.7	1577.2	16536.3	15150.7	4782.7	3072.8	9585.6	8447.9	3362.4	3596.3	1724.7	1225.6	2456.9	1653.7	7358.7	4627.9	10445.2	8362.9	3614.1	2709.3	3751.8	3577.2	9422.7	8116.6	1586.9	1787.8	2486.7	1339.1	19376.8	17286.4	9835.8	7229.7	2051.1	1002.8	2708	1985.8	1228.4	824.7	12477.6	7227.4	2033	1106.4	1805.6	1299.5	3352.5	2074.8	2570.1
408.752	10115	4982.2	2070.7	1140.2	17248.2	14578.9	5256.2	2413.6	9823.6	9866.6	3216.2	3494.7	1603.3	1100.3	2291	1849	7123.7	4691	12225.4	7689.7	4089.5	2215	4119.8	3909.3	10740.7	8483.8	2044.3	1516.1	2337.8	1462.7	20772.8	17825.6	9356.7	7508.9	1819.6	1265.6	2908.2	1943.4	1389.4	1231.5	11671.1	7339.2	2200.6	1046.9	1763	1575.7	3738.2	1738.2	2327
438.752	10517.3	5159.8	1911.1	1382.9	16789.5	13305.6	5319.4	2261.9	10150.1	9196.6	3831.9	3328	1557.3	1389.5	2744.9	1683.6	8475.3	4815.6	11892.8	7678.3	3769.9	1929.6	3725.8	3890.8	9690.9	8605.7	1847.3	1498	2623	1911.1	21929.8	17254.3	10090.2	7385.2	2283.3	1192.1	2763.6	2543.8	1468.4	963.3	11124.2	8262	2149	1034.3	1724.6	1195.3	3316.8	1869.6	2278.6
468.752	9919.3	5145.4	1960.3	1562.5	16627.5	13878.7	4985.4	2468.8	10192	10299.3	3049.1	3963.7	1626.6	1541.5	2172	1596.6	6717.3	4327.4	10365.1	6295.6	4038.7	1714.7	4679.7	4107.9	11367.5	8938.3	1946.6	1549.2	2630.8	1835.4	22197.2	17403.9	10668.2	7264.7	2496.7	1093	2430	2523.1	1519.5	1109.1	10268.5	8179.5	2115.1	914.1	1956.2	1524.4	3902.3	2097.7	2170.6
498.752	9002.2	4723.5	2819.8	1691.9	16263.8	14196.7	6191	2421.1	9998.8	8926.8	2961	3149.7	1582.3	1257.4	2708.3	1430	7301.2	4660	11147.1	6389.6	4084.1	1580.8	4479.6	3752.7	11363.8	7583.8	1854.1	1386.5	2931.3	1761.2	19462.1	19552.1	9528.6	7461.5	2533.9	1135.1	3168.8	2256.9	1562.3	1106.9	10537.8	7547.3	2161.4	797.7	2009.1	1470.7	3145	1838.7	2470.3
528.752	10062.7	5035.3	2582.1	1563.7	16945.6	13390.2	5421.5	2546.7	8939.3	9787.2	3382.1	3130	1730.9	1126.6	2357.4	1491.8	7239.1	4226.1	11467.9	7528.5	4112.3	1624.2	4608	3780.8	10768.4	7961.3	2106.7	1351.4	2700.7	1368.8	17767.4	16600.3	10558.7	7792	2882.5	1042.2	2905.9	2484.6	1396.3	977.3	10787.8	6218	2601.6	1002.3	2070.8	1368.3	3347.5	1688	2406.5
558.762	10367.4	5320.9	2714.4	1394.2	16515.1	13779.1	5490.7	2654.3	10133.7	9178.5	3559.1	3500.7	1589.7	1190.8	2605.8	1277.3	7259.3	4644.5	10947.4	6693.9	4586.4	1791.5	4882.8	3509.3	9922.1	7699.1	2503.6	1619	2785.4	1653.3	19953.6	18275.1	10463	8125.5	2152.4	1105.5	2636.2	2547.1	1555.5	835.4	11129	6061.4	2453.9	983.7	2308.8	1339.3	3924.8	1725.1	2551.9
588.763	11698.7	4748.9	3125.8	1578	18570.6	13821.1	5406.8	2525.9	9303.7	8730	3299.8	3417.8	1552.8	1022.3	2380.8	1392	6929	5101.7	11089.2	7192.1	4831.4	1791.5	4764.5	4294.7	10103.5	7739.3	2728.7	1536.9	2445.3	1414.9	20034	18131.9	9986.7	7425.4	2445.5	969.4	2674.4	2262.2	1447.6	958.1	11220.9	6772.2	2301.6	1222.9	2499.4	1467.2	4458.9	1716.8	2221.6
618.763	10542.6	5450.1	2964.7	1505	17775.1	14320.1	5085.8	2742.5	9272.6	8046.8	3750.6	3115.9	1773.8	1310.4	2697	1557.1	6749.7	5188.4	11178.7	7263.4	4893.6	1668.8	4745.9	3918.1	10650.5	7787	2169	1599.7	2677.9	1272.7	21203.6	17349.7	9593.7	7006.7	2276.7	1051	2861.5	2288.5	1473.5	932.4	10801.8	5584.1	2600.8	846.7	2751	1119	4142.5	1896.9	2248.5
648.763	10501.6	6184	3492.2	1673.4	16685.3	13491.2	4739.3	2597.6	9601.1	7110	2992.5	3876.8	1465.1	1255.4	2182	1187.7	6715.6	5162	11017.3	7156.1	5176.5	1577	5263.5	3322	10996.2	7677.7	2129.4	1408.9	2837	1480.4	22039.4	17320.4	11151	7345.6	2386.8	1102.1	2408.6	2570.7	1678	859.6	11902.9	4438.7	2844.2	962.1	3021.7	1434.7	3769.3	2041	2278.3
678.763	11052.1	5556.3	3914.1	1677.3	17402.5	12060	4569.8	2516.6	9046.7	7262.9	3690.5	3190.7	1763.5	1418.7	2409.9	1306.8	8031.2	5239.6	11350.1	6753.9	5280.1	1793.7	5377.7	3350.9	10436.1	6772.1	2248	1328.1	2907.3	1593.9	20445.1	15566.6	10499	7594.4	2199.6	939	2719.2	2457	1730.5	1163.6	12007	4448.9	2630.3	1038.3	3298.5	1145.8	4167.5	1610.6	2042.6
708.763	10973.5	5839	3663.5	1458	18182.1	12245.6	5393.9	2996.7	9874	7999.5	3419.1	3509.1	1745.7	1174.4	2755	1445.2	7484.2	5068.3	11757.4	7217.3	5204.2	1885.8	5120.2	3760.7	12159.7	7488.6	1906.8	1397.3	2523.1	1237.8	21162.9	12811.2	10351.3	6656.5	2027.6	1115.6	2821.7	2262.7	1776.2	944.1	11426.3	3814.2	2529	917.7	3685.6	1244.1	3857.4	1909	2392.9
738.763	11427.1	6157.2	3544.8	1246.9	19189.2	14180.7	5932.2	2447.4	8855.3	8607.3	3541.4	3225.1	1725.8	1203.4	2675.7	1579.5	7596.2	5289.7	10267.3	6259.2	4028.3	1420.6	5728	3548.7	10408.7	7367.5	2062.5	1246.2	2178.4	1627.1	22904.7	13543.9	10315.5	6754.6	1886.8	1290.8	2695.2	2463.2	1779	1052.7	11213.8	4062.1	2718.6	1180	3517.6	1528.6	3817.1	2052.1	2865.4
768.773	11710.3	6223.6	3522.9	1427.5	19679	13020.3	5101.5	2880.4	9748.3	7937.5	3761.5	3877.9	1619.9	1285.9	2450.3	1376.7	6656.3	5159.3	9657.6	6287.6	5144.6	1570.3	5404.4	3700.5	11292.6	7194.4	1660.1	1485	2393.2	1537.4	24234.7	14347.6	9315.1	7128.1	2217	852.9	2899.9	2579.6	1928.4	1179.5	12846.3	4707.5	2671.2	1095.7	3382.4	1236.8	3711.3	1760.3	2513.9
798.773	10498.2	6437.9	2928.8	1301.8	19445.6	13468.8	6136.9	2676.8	9525.4	8014.2	3238.1	3618.5	1968.4	1184.2	2581.1	1567.2	7548.6	5048.8	9210.7	5629	4853.3	1812.6	5917.7	3966.9	11710.4	7598.8	1495.4	1388.8	2599.4	1536.9	23862.1	16636.2	9548.5	6750.6	2065.7	962.4	2935.4	2328.9	1570.2	1041.8	12029.9	3636.4	2314.5	1006.2	3386.1	1427.8	3642.8	1674.2	2602.6
828.774	10462	6877	3795	1483.9	19685.5	12610.9	5263.4	3069.7	9417.8	8173	3701.5	3121	1611.1	1121.9	2840.5	1259.8	6591.3	4662.8	10273.2	5859.9	4575.5	1802.2	5031.8	3091.8	11535.3	6736.3	1861.3	1537.9	2658	1534.9	23771.8	16553.2	10187.5	6673.5	2612.8	1190.5	2639.7	2614.8	1764.5	898	11310.2	3820.8	2507.3	1096.8	3395.8	1089.2	3342.3	1598.6	2846.5
858.774	11311.3	6819.4	3881.5	1454	19795	14179.3	5660	2997	9710.4	9174.5	4079.7	3747.8	1662.5	1447.3	2974.7	1413.4	7954.9	5552.6	9723.9	6083.5	5414.5	1707.8	4297.9	3508.2	10885.1	6805.4	1782.9	1640	2705.7	1506.9	23746.1	16642.4	9336.9	7051	2621.9	810.1	3046.3	2532.7	1660	764.5	11655.6	3746.4	2305.6	1033.9	3494.7	1342.4	3087.6	1761.6	2755.7
888.774	10610.7	5392.5	3770.8	1437.9	21164.2	13559.4	5319.4	2557.5	10282.2	8173.2	3985.6	3785.2	2015.3	1273.1	2826.6	1629.7	6940	5493.4	8570.3	5462.5	4730.3	1905.5	5559.5	3462.1	9574	6739.5	1742.3	1436.8	2877.6	1684.2	23198.5	17187.4	9717.5	6675.8	2019	1072.9	2877.1	2118.5	1611.4	875.2	11983.9	4332.4	2941.6	1046.3	3674.9	1492.8	3559.3	1448	2773.6
	0 = mean of signal before frap
Ploted data	Calculation of total # cells in all fields
	1	2	3	4	5	6	7	8	9	10	11	12	13	14	15	16	17	18	19	20	21	22	23	24	25	26	27	28	29	30	31	32	33	34	35	36	37	38	39	40	41	42
0	101.201	101.903	99.3055	94.0986	96.7017	104.733	107.718	93.3065	109.572	104.264	107.075	95.6055	99.5232	98.1723	103.517	99.1614	99.9994	89.7854	102.713	111.587	101.851	107.914	103.913	105.756	102.953	97.8524	100.723	93.8846	102.175	110.118	97.9116	102.694	101.676	102.946	91.213	102.119	92.1956	102.368	94.7935	101.001	106.426	103.232
13.5	75.0312	91.8641	74.9376	76.1729	71.7116	109.557	72.0045	62.1562	90.3431	78.4807	81.1093	64.3308	77.3825	75.7663	108.636	65.5247	80.7257	72.0571	96.8195	130.43	97.2147	73.4065	69.9219	83.1995	72.0196	78.1345	67.8508	86.6524	61.1472	70.71	69.1252	77.7254	87.271	100.173	106.033	107.35	92.8274	58.7069	90.5192	67.5462	91.7797	75.1242
18.73	77.8679	66.3362	86.7139	80.8206	78.3381	111.54	84.6518	70.2916	99.6087	83.7273	100.473	93.7594	79.7939	100.963	110.697	60.6777	90.4713	112.356	107.381	110.414	99.5631	81.8218	93.0719	115.398	85.7544	65.9852	84.0445	73.9983	78.8598	91.3222	78.7581	99.0861	87.1296	107.135	90.9098	101.827	84.1976	79.3027	91.2447	91.9487	104.419	77.8947
48.74	81.2838	84.4562	95.0726	95.8932	95.3607	93.1625	69.4469	58.87	133.618	90.9769	111.792	82.2061	99.5267	97.3416	124.402	77.1967	93.8779	122.477	106.322	94.6132	102.845	85.5757	106.037	112.046	103.293	79.0482	80.0977	84.4719	90.3919	117.478	92.4604	93.3419	99.7173	100.499	101.649	110.878	91.4424	99.7726	105.779	108.984	108.391	89.8069
78.741	92.462	98.326	107.3	89.5977	95.6007	82.385	79.5284	67.0228	113.515	112.755	122.937	90.9152	95.4314	93.6021	156.594	111.123	123.914	87.8071	104.266	94.0194	98.0842	139.489	104.186	111.502	89.5509	79.6323	89.0209	85.123	88.0977	115.044	97.7805	94.9359	94.8399	96.6757	103.697	120.947	108.453	105.44	96.8275	113.782	113.501	100.138
108.741	82.8059	124.339	107.313	101.101	114.041	97.5271	103.779	79.8548	114.185	105.214	107.074	95.5993	112.101	87.3857	133.359	107.231	112.928	151.735	110.93	111.304	108.26	90.9359	112.045	138.482	109.57	120.575	105.115	121.413	99.2352	144.301	111.111	101.437	90.0453	110.112	112.644	103.453	104.385	94.2415	98.2766	119.109	100.832	95.564
138.741	97.5827	100.513	103.524	105.962	91.6566	103.623	110.879	119.901	115.442	104.773	99.0412	85.9053	102.495	106.349	102.682	121.582	110.735	133.227	98.0886	135.574	100.483	103.208	136.098	114.081	88.1005	79.2743	106.936	126.136	100.056	123.006	126.472	107.026	99.1599	117.692	102.087	107.307	126.916	100.37	96.0868	97.5033	97.1373	95.4855
168.741	96.501	120.014	106.572	119.331	98.2691	118.239	90.7229	98.4262	144.661	120.397	100.682	73.4682	111.186	91.4977	131.359	107.624	104.315	177.628	115.181	95.3181	103.918	94.8102	100.147	113.095	92.5177	108.968	107.556	125.109	93.6963	91.5319	121.928	112.14	105.054	116.904	110.137	94.1769	159.183	114.253	110.955	145.971	114.706	109.579
198.741	108.328	154.602	103.586	96.4596	99.5569	121.44	99.9631	136.532	170.945	122.954	99.4351	98.094	123.035	78.1392	144.694	160.032	124.101	185.828	115.846	114.018	127.066	107.804	84.5269	171.534	108.679	135.834	106.823	119.907	91.068	98.2058	105.12	110.031	94.005	126.034	107.967	113.615	106.227	100.884	130.566	129.408	108.48	105.08
228.741	116.862	135.139	100.228	122.972	98.5868	95.4669	96.7763	107.363	133.584	111.501	179.941	79.7364	106.064	104.931	106.328	157.678	113.149	103.659	133.01	103.746	153.322	120.835	109.766	167.769	131.302	164.656	96.0517	121.305	90.4978	89.9501	111.613	121.735	103.534	146.98	117.759	112.524	155.568	119.603	115.694	119.686	118.468	104.412
258.741	138.509	142.053	121.927	132.083	85.6984	80.3608	101.12	110.039	127.532	107.014	152.746	86.3502	115.653	82.6599	148.987	142.418	121.072	163.492	118.463	103.644	142.877	189.414	121.707	142.681	149.191	155.656	98.929	133.803	75.994	93.4568	92.6751	108.669	95.7162	154.288	116.726	128.873	113.31	134.031	108.669	132.781	113.525	98.9812
288.751	167.057	126.229	120.859	146.526	87.2591	83.2427	110.035	118.594	138.941	106.319	129.052	99.5039	128.585	128.307	136.25	115.056	128.788	150.259	106.651	109.816	138.824	142.311	103.129	111.681	138.433	142.807	92.3877	132.278	87.1236	107.61	120.475	99.2343	110.534	134.477	121.415	134.873	174.829	132.504	110.549	102.336	101.276	100.123
318.751	205.312	201.516	125.819	117.39	99.4262	84.3874	140.919	134.443	160.628	112.782	215.35	93.4865	113.595	112.541	156.651	119.404	130.726	239.024	100.348	102.767	177.136	141.376	114.751	150.727	127.093	122.152	92.0561	135.605	84.4739	91.5496	121.391	126.581	95.5187	171.782	164.194	139.143	236.232	131.91	115.78	109.122	101.685	109.987
348.752	211.697	103.3	112.5	131.661	101.287	89.6432	113.543	185.372	154.526	139.378	155.598	99.8326	113.591	144.981	148.029	115.139	135.148	167.307	112.56	136.173	168.077	164.653	108.645	143.981	123.961	147.517	94.4956	139.894	69.3977	73.2778	111.089	136.504	96.8589	185.507	149.923	137.153	210.791	121.884	98.1646	116.062	117.623	108.108
378.752	178.208	160.582	109.145	155.646	113.467	93.4961	140.723	148.57	159.007	124.899	133.396	104.881	116.092	88.7627	185.699	112.093	136.047	204.537	136.368	148.951	172.643	183.749	138.946	161.582	131.255	165.185	93.6364	145.134	77.8506	81.2298	122.854	127.478	116.003	147.917	122.26	141.026	217.955	131.355	107.478	113.344	109.931	126.175
408.752	203.023	181.608	118.309	217.774	99.5642	92.0308	145.715	123.905	151.859	158.984	184.628	105.385	126.602	134.839	159.828	116.534	124.608	143.774	149.645	112.822	159.024	210.202	111.887	215.062	107.463	164.24	101.65	158.83	99.3388	90.4683	130.865	115.222	93.4921	145.28	124.194	163.214	182.102	119.766	109.295	131.571	106.396	120.739
438.752	203.832	138.195	126.184	235.174	110.368	115.141	112.076	163.038	175.997	154.888	195.372	95.7592	112.61	123.318	137.251	127.098	136.627	191.536	108.641	152.434	134.643	207.773	144.282	177.407	122.262	153.184	106.776	161.304	84.4855	114.806	136.537	118.855	104.648	185.573	133.206	127.81	170.922	172.917	99.9052	129.338	117.104	118.926
468.752	192.78	125.459	119.806	201.936	98.9582	76.9256	105.521	136.039	155.227	164.64	235.534	113.92	127.177	125.652	143.337	127.542	146.85	228.426	96.3101	137.003	125.539	231.386	128.326	186.028	102.901	165.202	90.5797	161.433	83.1636	83.975	122.328	125.755	100.765	179.947	154.167	180.375	177.767	182.734	87.6739	121.686	97.7595	107.022
498.752	190.583	166.665	114.56	255.71	112.009	94.009	125.839	189.392	156.678	174.457	258.357	119.37	149.843	133.725	166.438	99.5397	127.704	223.231	140.405	141.142	139.623	270.954	136.608	171.045	109.933	150.982	91.2104	176.045	81.3859	112.373	116.207	106.465	88.983	176.884	165.213	179.539	190.385	181.013	88.2127	127.529	104.466	120.689
528.752	199.843	165.128	126.552	212.883	91.3366	108.054	153.639	158.024	171.295	152.326	253.189	121.879	135.259	155.89	197.304	107.031	135.507	276.578	116.956	142.873	173.493	259.563	151.341	198.312	114.236	157.353	107.888	184.217	94.48	117.645	122.299	110.713	97.8457	158.128	177.653	144.425	283.51	195.588	90.8561	123.188	106.662	114.981
558.762	194.843	194.692	119.856	206.861	110.407	101.668	133.498	204.008	156.299	163.543	256.009	139.139	128.874	154.639	168.475	109.185	128.767	194.699	103.498	186.198	183.604	249.456	172.389	227.511	118.374	133.558	128.449	162.568	80.8745	128.128	128.945	108.089	103.724	181.157	136.664	182.57	250.371	171.697	110.949	118.385	100.223	130.094
588.763	246.345	198.086	134.364	214.054	106.572	96.5475	151.893	171.034	135.817	154.186	269.685	110.939	130.548	177.546	172.825	110.49	134.494	252.269	118.221	151.091	165.691	188.208	170.352	259.722	112.863	163.396	113.649	195.581	76.6191	129.863	102.547	104.374	106.272	168.128	148.222	154.777	270.427	186.66	105.804	135.109	89.5841	111.879
618.763	193.439	196.99	124.127	185.444	115.233	120.37	135.363	173.207	130.092	153.905	293.241	121.128	136.773	135.588	210.411	122.213	136.922	216.622	125.038	158.033	193.439	307.169	245.845	218.383	123.925	153.096	114.23	203.228	82.6212	108.789	116.962	107.458	126.161	187.46	168.509	146.794	221.016	165.971	115.699	158.374	89.8575	126.452
648.763	169.819	208.689	123.675	182.449	135.037	77.19	116.704	183.716	130.097	153.957	328.25	158.444	143.223	151.139	191.637	127.245	151.805	216.568	93.6943	195.207	268.162	295.624	210.615	184.679	131.428	164.202	107.548	209.386	76.3869	98.0638	124.267	109.582	115.716	189.514	195.943	111.957	283.153	176.018	120.494	116.14	93.5201	125.177
678.763	198.911	233.357	144.299	181.586	124.56	115.664	124.304	184.412	153.279	168.053	294.369	160.485	154.104	169.264	182.402	131.34	138.247	234.249	110.672	148.719	269.887	253.328	287.877	258.755	113.724	185.681	100.256	216.401	82.4453	109.152	112.034	114.246	107.684	170.848	160.136	151.375	355.258	172.817	146.693	155.777	103.431	127.123
708.763	187.935	251.269	148.479	179.995	123.433	97.4352	148.646	190.631	147.667	162.906	275.968	136.15	162.376	136.463	203.837	165.191	155.507	181.75	124.705	188.137	299.573	275.58	296.246	202.064	128.561	168.911	115.13	253.45	86.7547	97.7929	98.6682	98.3658	105.795	194.486	164.446	163.913	275.586	178.155	112.305	114.275	107.146	109.515
738.763	185.589	284.289	135.319	242.388	102.881	109.807	143.41	169.402	143.604	164.035	283.563	161.411	141.279	165.503	133.882	169.115	152.718	146.173	109.419	168.994	276.059	230.39	230.119	186.009	161.15	229.767	115.21	232.595	95.3253	94.524	111.606	124.6	123.421	143.432	165.762	149.286	309.183	182.003	121.709	130.237	92.3921	117.417
768.773	188.16	246.788	151.141	177.111	122.813	96.9984	125.974	177.984	129.016	153.598	327.619	146.045	156.964	111.791	155.665	168.911	130.681	259.937	112.417	163.493	272.89	243.789	273.48	210.833	146.438	174.762	113.643	218.054	88.0022	110.997	115.732	134.664	122.967	185.399	192.952	180.45	313.135	170.363	126.869	137.162	107.371	124.843
798.773	163.069	224.981	144.375	229.263	118.857	89.4874	166.222	164.695	149.513	163.629	267.754	149.177	154.109	107.676	169.133	143.435	141.447	214.64	126.042	150.72	330.819	230.024	237.155	217.585	117.968	230.996	119.75	242.345	93.8225	92.0064	105.968	133.769	117.665	173.498	159.415	137.815	327.903	165.696	116.247	127.577	100.063	119.151
828.774	152.13	255.745	156.099	171.463	115.231	118.6	143.605	225.472	141.359	175.314	253.884	162.747	171.241	121.029	173.171	143.608	152.656	219.471	100.952	196.492	296.017	228.601	311.77	209.077	164.509	193.083	110.933	236.442	103.32	89.4076	95.372	98.36	113.091	156.584	184.983	205.382	281.994	144.644	128.74	135.682	97.6133	136.111
858.774	165.869	266.953	139.605	188.856	105.841	108.856	114.869	210.464	143.264	159.841	317.045	122.51	159.948	108.713	179.554	142.684	132.42	323.651	120.279	217.135	311.115	223	260.332	175.272	126.414	207.377	99.5687	217.684	95.9774	117.111	96.6236	118.552	108.754	170.066	203.677	235.886	325.434	162.389	116.496	153.922	100.356	123.342
888.774	196.768	262.244	156.085	207.992	125.804	105.294	158.299	173.443	126.333	156.893	248.245	160.582	142.058	121.263	170.859	134.974	145.563	188.182	135.808	184.118	276.611	281.143	246.175	245.808	139.461	168.952	122.99	217.655	87.3347	80.6054	101.79	104.241	102.171	173.776	171.433	212.873	296.752	155.307	130.746	110.027	88.6362	112.93
Channel,001 - GFP	RAW DATA imported LAS AF software																								Channel,001
Axis [s]	ROI1 []	ROI2 []	ROI3 []	ROI4 []	ROI5 []	ROI6 []	ROI7 []	ROI8 []	ROI9 []	ROI10 []	ROI11 []	ROI12 []	ROI13 []	ROI15 []	ROI14 []	ROI16 []	ROI17 []	ROI18 []	ROI19 []	ROI20 []	ROI21 []	ROI22 []	ROI23 []	ROI24 []	Axis [s]	ROI1 []	ROI2 []	ROI3 []	ROI4 []	ROI5 []	ROI6 []	ROI7 []	ROI8 []	ROI9 []	ROI10 []	ROI11 []	ROI12 []	ROI13 []	ROI14 []	ROI15 []	ROI16 []	ROI17 []	ROI18 []	ROI19 []	ROI20 []	ROI21 []	ROI22 []	ROI23 []	ROI24 []
0	9403.5	1705.2	16027.7	3876.3	11280.5	3865.1	1495.6	2024.4	7855.3	10930.5	2611.6	3848.3	8907.6	15978.9	1633.2	3281.9	11350.3	3590.1	1488.8	2075.1	7558.8	10720.3	2751.4	3966.4	0	9902.7	1723.8	1705.2	16644.4	7979.3	1110.3	2571	999.6	13445.9	1355	1693.1	1998.4	2831.8	10034.9	1705.5	1738.7	17084.8	7729.3	1097.1	2691.3	1091.1	12658.7	1406.3	1456
5.16	9859.2	1556.7	15918.2	2989.7	10415.6	3496.7	1946	2198	8369.3	10860.7	3075.9	3524.7	10126.5	16190.4	1567.8	4014.7	11085.8	3439	1706.2	2450.2	7248.5	10179.7	2560.3	3745.5	5.16	9719.4	1466.8	2018	15979.6	8260.6	1153.1	3176.7	1240.5	12519.9	1653.2	1766.9	1812.2	2296.8	9681.2	1544.5	1858	15815.1	8510.7	1423.8	2904.6	916.4	12835.2	1381.3	1873.7
13.5	6603.2	1186.7	11143.6	2498.7	6964.2	3239.7	1214.5	1496.1	5666.5	8437.3	2050.2	2618.2	8800.6	14870.5	1291.8	3280.3	9711.4	2957.1	1686.7	2407	6272.2	10750.8	2527.7	4069.9	14.54	6616.2	1189	1578.8	11175.5	6625.4	964.7	2523.6	1030.4	11099.2	996.2	1280.9	1408.9	1777.3	8550	1569.3	1453.3	17055.4	8207.3	1338.8	2606.5	790	11417.2	1357.1	1831.9
18.73	7303.7	1110.6	12979.6	3017.6	8375.6	3665.2	1503.5	1236.5	5880.3	8844.7	2635.7	3179.1	9379.6	14968.3	1674.2	3733.7	10691.6	3286	1776.1	1759.1	5903.4	10563.7	2623.3	3390.7	19.77	7417.4	1865.7	1510.9	11132.9	7009.9	1033.9	2780.3	997.7	11119.7	1245.9	1514	1985.2	1954	9295.7	1847.9	1364.9	18347.6	7748.2	920.2	2589.2	903.6	11168.5	1522.7	1626.7
48.74	7778.7	1534.4	14746.8	3399.7	9155.2	3395.4	1273.1	1521.2	7462.7	9589.6	3232.7	3163.7	9569.8	15511.1	1816.8	3545.3	9600.6	3644.6	1833.2	2584	5585.1	10540.7	2891.7	3848.5	49.77	8748.4	1530.6	1881.2	13051.8	7099.8	1369.9	2731.1	987.1	11874.1	1429.2	1580.8	2007.3	2007.4	8790	1572.4	1512.2	16907.2	7562.8	1118.5	2568.7	1043.3	11545.6	1670.1	1490.8
78.741	8295.6	1415.6	15266.5	3050.8	9392	3551.7	1413.3	1775.5	7173.8	10695.4	3471.5	3501.6	8971.9	14227.9	1439.7	3405	9824.2	4311.1	1777.1	2649.1	6319.7	9485.5	2823.8	3851.5	79.78	8639.6	1606.4	2454.3	16044.6	8487.1	1183.2	2671.6	833.2	11038.2	1781	1580.5	2206.4	2141.7	9053.2	1716.2	1567.3	14438.6	6849.2	1347.5	2562.3	886.2	11253.8	1276.8	1517
108.741	7732.5	1815.1	15203.3	3314.2	10068	3738.8	1700	1616.5	7017	10486.6	3015	3669.1	9338.1	14167.3	1459.8	3278.1	8828.4	3833.6	1638.1	2024.3	6145.3	9966.9	2815.8	3838	109.78	8854.2	1280.2	2395.4	16110.6	7830.3	1605.2	2839.7	1021.1	11876.1	1263.1	1352.5	2641.4	2304.8	7898.4	1465	1796.2	15024.2	6933.9	1057.9	2559.9	917.4	10970	1389	1207.1
138.741	8420.8	1822.2	15506	3361	9371.8	3700.6	1574.7	2131	6864.3	9825.6	2902.5	3160.8	8629.4	14978.2	1812.9	3171.9	10224.9	3571.2	1420.2	1777.3	5946.1	9378	2930.6	3679.4	139.78	8868.2	1534.3	1722.8	17306.5	8378.2	1460.3	2555.6	1127.3	10739	1299.8	1782.2	2441.9	2495.8	8652.3	1442.7	1677.8	14234.4	7566	1096.1	2605.4	831.5	10687.4	1259.4	1309.5
168.741	8135.9	1857.7	16147.7	3455.7	9140.4	4060.1	1519.7	1957.5	7504	10790.7	3025.9	3265	8430.9	15151.9	1547.9	2895.9	9301.4	3433.8	1675.1	1988.8	5187.3	8962.6	3005.4	4444.1	169.78	9498.2	1651.9	2033.7	15188.3	7941.3	1853.9	2830	1095.3	10384.2	1333.6	1563.2	2361.2	2320.9	8542.6	1805.4	1548.2	14112.4	7612.8	1043.7	2457	1149.1	9992.7	1406.6	1560.9
198.741	9321	2190.4	15494	3413.8	9571	3632.5	1353.2	2313.8	8910.7	9919.2	2992.6	3885.7	8604.4	14957.6	1416.8	3539.1	9613.6	2991.2	1353.7	1694.7	5212.6	8067.4	3009.6	3961.2	199.78	10430.3	1513.4	2118.9	17651.4	8686.6	1757	3313.3	1059	11327.7	1306.8	1579.3	2896.7	2568.3	8477.5	1936.8	1464.4	11029.9	6999.6	945.5	2860.1	928.8	8914.8	1212.2	1868.4
228.741	9249.3	1726.8	15797.6	3993.5	9976	3715	1320.9	1895.5	7186.7	10302.8	4243	3417.5	7914.7	15761.6	1277.8	3247.5	10119	3891.4	1364.9	1765.5	5379.9	9240.1	2358	4286	229.781	9358.7	1670.6	1792.9	18514.7	8280.6	1337.1	3208.6	1063.5	12301.5	1447.6	1543.2	3028.9	2766	8823.6	1592.1	1686.2	11742.1	7318.3	1289.9	2412.3	1025.1	8023.3	1198	1405.9
258.741	9776.1	1857.2	16367.8	4041.2	9186.1	3380.7	1507.6	1805.3	6961.7	9601.2	3807.2	3908.9	7058.1	13424.3	1307.4	3059.6	10719.1	4206.9	1490.9	1640.6	5458.8	8971.9	2492.5	4526.8	259.781	10284.2	1348.1	2352.5	18447.6	9124.1	1798.9	3226.7	1004	11284	1742.8	1947.8	2958.2	2784.5	8892.3	1630.9	1579	12953.1	7536.1	1100.3	2723.8	968.7	7897.7	920.1	1600.4
288.751	10334.8	2020.3	16539.2	4471.4	9019.1	3519.5	1491.2	1981	7473.8	9587.6	3633.6	3851	6186.4	13684.7	1600.5	3051.6	10336	4228	1355.2	1670.4	5379.1	9017.8	2815.6	3870.2	289.781	10505.5	1893.3	2152.2	17871.7	9083.8	1826.7	2767.7	1034.8	10469.1	1536.1	1628	2748.7	3120.7	8170.1	1475.6	1579.6	15533	7053.3	1215.7	2595.1	942.3	7541.3	1079.4	1578.6
318.751	11019.5	2233	16746.1	3764.8	9234.9	3075.5	1497.4	2135.9	7736	10165.3	4409.3	3771.9	5367.2	13309.7	1108.1	3207.1	9288.2	3644.5	1062.6	1588.7	4816.1	9013.2	2047.5	4034.7	319.791	9935.5	1731.1	2277.7	19095.2	9141.4	2017.6	2909.8	1225.8	12603.4	1596.7	1937	3276.8	2809.9	8746.4	1538.2	1454	15992.1	6992.8	844.1	2899.7	1192.8	7115.1	1129.4	1688
348.752	12069.5	1818.6	16821	3976.7	9838.3	3437.1	1605.5	2518.1	7207.4	10911.8	3450.7	3638.8	5701.3	14952	1760.5	3020.4	9713.3	3834.2	1414	1358.4	4664.2	7828.9	2217.7	3644.9	349.791	9387.4	1882	2241.6	19591.2	9426	1776.3	2771.9	1417.7	10994.1	1769.2	1855	3119.5	2634.8	8264.2	1298.1	1514.3	17015.2	6974.6	1061.7	2462.6	1041.1	6541.1	1074.5	1707.4
378.752	11187.7	2532.7	16536.3	4782.7	9585.6	3362.4	1724.7	2456.9	7358.7	10445.2	3614.1	3751.8	6277.9	15150.7	1577.2	3072.8	8447.9	3596.3	1225.6	1653.7	4627.9	8362.9	2709.3	3577.2	379.791	9422.7	1586.9	2486.7	19376.8	9835.8	2051.1	2708	1228.4	12477.6	2033	1805.6	3352.5	2570.1	8116.6	1787.8	1339.1	17286.4	7229.7	1002.8	1985.8	824.7	7227.4	1106.4	1299.5
408.752	10115	2070.7	17248.2	5256.2	9823.6	3216.2	1603.3	2291	7123.7	12225.4	4089.5	4119.8	4982.2	14578.9	1140.2	2413.6	9866.6	3494.7	1100.3	1849	4691	7689.7	2215	3909.3	409.791	10740.7	2044.3	2337.8	20772.8	9356.7	1819.6	2908.2	1389.4	11671.1	2200.6	1763	3738.2	2327	8483.8	1516.1	1462.7	17825.6	7508.9	1265.6	1943.4	1231.5	7339.2	1046.9	1575.7
438.752	10517.3	1911.1	16789.5	5319.4	10150.1	3831.9	1557.3	2744.9	8475.3	11892.8	3769.9	3725.8	5159.8	13305.6	1382.9	2261.9	9196.6	3328	1389.5	1683.6	4815.6	7678.3	1929.6	3890.8	439.791	9690.9	1847.3	2623	21929.8	10090.2	2283.3	2763.6	1468.4	11124.2	2149	1724.6	3316.8	2278.6	8605.7	1498	1911.1	17254.3	7385.2	1192.1	2543.8	963.3	8262	1034.3	1195.3
468.752	9919.3	1960.3	16627.5	4985.4	10192	3049.1	1626.6	2172	6717.3	10365.1	4038.7	4679.7	5145.4	13878.7	1562.5	2468.8	10299.3	3963.7	1541.5	1596.6	4327.4	6295.6	1714.7	4107.9	469.792	11367.5	1946.6	2630.8	22197.2	10668.2	2496.7	2430	1519.5	10268.5	2115.1	1956.2	3902.3	2170.6	8938.3	1549.2	1835.4	17403.9	7264.7	1093	2523.1	1109.1	8179.5	914.1	1524.4
498.752	9002.2	2819.8	16263.8	6191	9998.8	2961	1582.3	2708.3	7301.2	11147.1	4084.1	4479.6	4723.5	14196.7	1691.9	2421.1	8926.8	3149.7	1257.4	1430	4660	6389.6	1580.8	3752.7	499.792	11363.8	1854.1	2931.3	19462.1	9528.6	2533.9	3168.8	1562.3	10537.8	2161.4	2009.1	3145	2470.3	7583.8	1386.5	1761.2	19552.1	7461.5	1135.1	2256.9	1106.9	7547.3	797.7	1470.7
528.752	10062.7	2582.1	16945.6	5421.5	8939.3	3382.1	1730.9	2357.4	7239.1	11467.9	4112.3	4608	5035.3	13390.2	1563.7	2546.7	9787.2	3130	1126.6	1491.8	4226.1	7528.5	1624.2	3780.8	529.792	10768.4	2106.7	2700.7	17767.4	10558.7	2882.5	2905.9	1396.3	10787.8	2601.6	2070.8	3347.5	2406.5	7961.3	1351.4	1368.8	16600.3	7792	1042.2	2484.6	977.3	6218	1002.3	1368.3
558.762	10367.4	2714.4	16515.1	5490.7	10133.7	3559.1	1589.7	2605.8	7259.3	10947.4	4586.4	4882.8	5320.9	13779.1	1394.2	2654.3	9178.5	3500.7	1190.8	1277.3	4644.5	6693.9	1791.5	3509.3	559.802	9922.1	2503.6	2785.4	19953.6	10463	2152.4	2636.2	1555.5	11129	2453.9	2308.8	3924.8	2551.9	7699.1	1619	1653.3	18275.1	8125.5	1105.5	2547.1	835.4	6061.4	983.7	1339.3
588.763	11698.7	3125.8	18570.6	5406.8	9303.7	3299.8	1552.8	2380.8	6929	11089.2	4831.4	4764.5	4748.9	13821.1	1578	2525.9	8730	3417.8	1022.3	1392	5101.7	7192.1	1791.5	4294.7	589.802	10103.5	2728.7	2445.3	20034	9986.7	2445.5	2674.4	1447.6	11220.9	2301.6	2499.4	4458.9	2221.6	7739.3	1536.9	1414.9	18131.9	7425.4	969.4	2262.2	958.1	6772.2	1222.9	1467.2
618.763	10542.6	2964.7	17775.1	5085.8	9272.6	3750.6	1773.8	2697	6749.7	11178.7	4893.6	4745.9	5450.1	14320.1	1505	2742.5	8046.8	3115.9	1310.4	1557.1	5188.4	7263.4	1668.8	3918.1	619.802	10650.5	2169	2677.9	21203.6	9593.7	2276.7	2861.5	1473.5	10801.8	2600.8	2751	4142.5	2248.5	7787	1599.7	1272.7	17349.7	7006.7	1051	2288.5	932.4	5584.1	846.7	1119
648.763	10501.6	3492.2	16685.3	4739.3	9601.1	2992.5	1465.1	2182	6715.6	11017.3	5176.5	5263.5	6184	13491.2	1673.4	2597.6	7110	3876.8	1255.4	1187.7	5162	7156.1	1577	3322	649.802	10996.2	2129.4	2837	22039.4	11151	2386.8	2408.6	1678	11902.9	2844.2	3021.7	3769.3	2278.3	7677.7	1408.9	1480.4	17320.4	7345.6	1102.1	2570.7	859.6	4438.7	962.1	1434.7
678.763	11052.1	3914.1	17402.5	4569.8	9046.7	3690.5	1763.5	2409.9	8031.2	11350.1	5280.1	5377.7	5556.3	12060	1677.3	2516.6	7262.9	3190.7	1418.7	1306.8	5239.6	6753.9	1793.7	3350.9	679.802	10436.1	2248	2907.3	20445.1	10499	2199.6	2719.2	1730.5	12007	2630.3	3298.5	4167.5	2042.6	6772.1	1328.1	1593.9	15566.6	7594.4	939	2457	1163.6	4448.9	1038.3	1145.8
708.763	10973.5	3663.5	18182.1	5393.9	9874	3419.1	1745.7	2755	7484.2	11757.4	5204.2	5120.2	5839	12245.6	1458	2996.7	7999.5	3509.1	1174.4	1445.2	5068.3	7217.3	1885.8	3760.7	709.802	12159.7	1906.8	2523.1	21162.9	10351.3	2027.6	2821.7	1776.2	11426.3	2529	3685.6	3857.4	2392.9	7488.6	1397.3	1237.8	12811.2	6656.5	1115.6	2262.7	944.1	3814.2	917.7	1244.1
738.763	11427.1	3544.8	19189.2	5932.2	8855.3	3541.4	1725.8	2675.7	7596.2	10267.3	4028.3	5728	6157.2	14180.7	1246.9	2447.4	8607.3	3225.1	1203.4	1579.5	5289.7	6259.2	1420.6	3548.7	739.803	10408.7	2062.5	2178.4	22904.7	10315.5	1886.8	2695.2	1779	11213.8	2718.6	3517.6	3817.1	2865.4	7367.5	1246.2	1627.1	13543.9	6754.6	1290.8	2463.2	1052.7	4062.1	1180	1528.6
768.773	11710.3	3522.9	19679	5101.5	9748.3	3761.5	1619.9	2450.3	6656.3	9657.6	5144.6	5404.4	6223.6	13020.3	1427.5	2880.4	7937.5	3877.9	1285.9	1376.7	5159.3	6287.6	1570.3	3700.5	769.803	11292.6	1660.1	2393.2	24234.7	9315.1	2217	2899.9	1928.4	12846.3	2671.2	3382.4	3711.3	2513.9	7194.4	1485	1537.4	14347.6	7128.1	852.9	2579.6	1179.5	4707.5	1095.7	1236.8
798.773	10498.2	2928.8	19445.6	6136.9	9525.4	3238.1	1968.4	2581.1	7548.6	9210.7	4853.3	5917.7	6437.9	13468.8	1301.8	2676.8	8014.2	3618.5	1184.2	1567.2	5048.8	5629	1812.6	3966.9	799.803	11710.4	1495.4	2599.4	23862.1	9548.5	2065.7	2935.4	1570.2	12029.9	2314.5	3386.1	3642.8	2602.6	7598.8	1388.8	1536.9	16636.2	6750.6	962.4	2328.9	1041.8	3636.4	1006.2	1427.8
828.774	10462	3795	19685.5	5263.4	9417.8	3701.5	1611.1	2840.5	6591.3	10273.2	4575.5	5031.8	6877	12610.9	1483.9	3069.7	8173	3121	1121.9	1259.8	4662.8	5859.9	1802.2	3091.8	829.813	11535.3	1861.3	2658	23771.8	10187.5	2612.8	2639.7	1764.5	11310.2	2507.3	3395.8	3342.3	2846.5	6736.3	1537.9	1534.9	16553.2	6673.5	1190.5	2614.8	898	3820.8	1096.8	1089.2
858.774	11311.3	3881.5	19795	5660	9710.4	4079.7	1662.5	2974.7	7954.9	9723.9	5414.5	4297.9	6819.4	14179.3	1454	2997	9174.5	3747.8	1447.3	1413.4	5552.6	6083.5	1707.8	3508.2	859.813	10885.1	1782.9	2705.7	23746.1	9336.9	2621.9	3046.3	1660	11655.6	2305.6	3494.7	3087.6	2755.7	6805.4	1640	1506.9	16642.4	7051	810.1	2532.7	764.5	3746.4	1033.9	1342.4
888.774	10610.7	3770.8	21164.2	5319.4	10282.2	3985.6	2015.3	2826.6	6940	8570.3	4730.3	5559.5	5392.5	13559.4	1437.9	2557.5	8173.2	3785.2	1273.1	1629.7	5493.4	5462.5	1905.5	3462.1	889.813	9574	1742.3	2877.6	23198.5	9717.5	2019	2877.1	1611.4	11983.9	2941.6	3674.9	3559.3	2773.6	6739.5	1436.8	1684.2	17187.4	6675.8	1072.9	2118.5	875.2	4332.4	1046.3	1492.8
[truncated: 37 more columns]

## Sheet: RR3
REORGANIZED DATA FROM 3 FIELDS	CELL FRAP	CONTROL	CELL FRAP	CONTROL	CELL FRAP	CONTROL	CELL FRAP	CONTROL	CELL FRAP	CONTROL	CELL FRAP	CONTROL	CELL FRAP	CONTROL	CELL FRAP	CONTROL	CELL FRAP	CONTROL	CELL FRAP	CONTROL	CELL FRAP	CONTROL	CELL FRAP	CONTROL	CELL FRAP	CONTROL	CELL FRAP	CONTROL	CELL FRAP	CONTROL	CELL FRAP	CONTROL	CELL FRAP	CONTROL	CELL FRAP	CONTROL	CELL FRAP	CONTROL	CELL FRAP	CONTROL	CELL FRAP	CONTROL	CELL FRAP	CONTROL	CELL FRAP	CONTROL	CELL FRAP	CONTROL	CELL FRAP
Axis [s] - TIME	ROI1 []	ROI15 []	ROI2 []	ROI16 []	ROI3 []	ROI17 []	ROI4 []	ROI18 []	ROI5 []	ROI19 []	ROI6 []	ROI20 []	ROI7 []	ROI21 []	ROI8 []	ROI22 []	ROI9 []	ROI23 []	ROI10 []	ROI24 []	ROI11 []	ROI25 []	ROI12 []	ROI26 []	ROI13 []	ROI27 []	ROI14 []	ROI28 []	ROI1 []	ROI18 []	ROI2 []	ROI19 []	ROI3 []	ROI20 []	ROI4 []	ROI21 []	ROI5 []	ROI22 []	ROI6 []	ROI23 []	ROI7 []	ROI24 []	ROI8 []	ROI25 []	ROI9 []	ROI26 []	ROI10 []	ROI27 []	ROI11 []
0	1594.4	1600.2	2289.4	2192.9	26626	27651.9	19356.8	19160.9	17576.4	15477.9	3973.9	3329.3	3718.8	3663.5	3477.2	2923.6	4210.7	4330.8	1753.9	1379.3	8275.7	8528.4	2499.8	2221.5	2126.2	2326.2	3100.6	3156.3	1520.7	1626.6	22228	22879.8	19015.4	19093.2	6668	6749.2	2878.4	3015.9	10681.1	11186.9	1103.3	1036.7	3976.6	3525.1	1774.1	2168.5	2900.3	2905.9	3702.6
5.17	1931.8	1718.7	2049.3	2263.8	27585.2	27384.5	18653.7	19414.2	16419.8	18004.3	3129	3858	3690.3	3476.3	2780.9	3099.8	4709.9	3999.8	1997.8	2012.2	8043.1	8398.8	2255.8	2576.8	1658	1727.9	2983.1	2835.9	1643.6	1523.1	20969	21101.5	17904.5	18812.8	6851.9	6585	2845.7	2865.4	12143.3	12393.9	1103.8	1327.7	3722.7	4266	2055.9	1673.4	2686.9	2843.3	3553.3
16.1	1175	1764	1702.9	2453.1	22648.3	22294.8	14249.5	17198.1	10878.4	14002.1	2780.1	2213	2221.3	3427.7	2165.6	2795.7	2583	3058.8	1171.8	1642.4	5214	7598	1910.3	2088.3	1012.3	1744.9	2060.3	2753.3	918.1	1621.5	11932.9	20910.1	16293.7	16171.8	4030.3	6119	2243.2	3032.6	6768.3	11417.3	914.2	1198.3	1932.4	3500.6	1333	1769	1542.5	2532.5	2227
21.33	1116.6	1558.9	2123.3	1996	24023.4	23246	15014.5	15445.5	12834.8	15678	2452.2	2471.7	2723.9	3182.7	2337.6	2485.1	3258.3	3344	1990.6	2322.4	5682.8	8798.6	1954.1	2526.2	941.2	2304.7	1911.3	2455	932.4	1566.6	13627.7	20132	14856.5	18100.5	4589	6033	1952.6	2278.4	7952.6	11930.2	1011.1	1053.3	2299.9	3779.9	1398.1	1842.1	2226.1	2384.2	2604.5
51.33	1628.1	1774.2	2188.8	2220.5	23451.4	25549.2	16631.9	14984.5	14921.4	14637.3	2629.5	2310.5	3107.4	3305.8	2818.7	2494.2	3583.6	3664.2	2149.5	1547.7	6564.6	6851.8	2263.8	2000.4	1101.5	2359.3	2464.6	2927.5	1397.4	1306.8	17564.7	19869.4	15448.6	17879	5730.6	5643.7	2536.4	2237	8403.5	10657.8	1027.6	1274.9	3285.3	3190.2	1372.3	1894	2719.9	2548.4	3581
81.34	1400	1298.1	2117.1	1811.2	22139.2	22853	17543.1	16895.3	15314.9	15101.8	2884	2273.3	2710.7	3687	2651.7	2439	4325.8	4052.3	1867.7	1402.5	7989	8213.5	1792.4	1863.6	1267.4	1883.4	2252.7	2745.3	1481.1	1408.1	20203.7	19583.3	17364.2	16702.4	4939.5	6086.2	2862.3	1905.1	9445	10269.9	942.8	1355.3	2973.8	3210.4	1234.9	1722	2849.6	2385.8	3623
111.34	1585.6	1473.4	1781.3	2181.8	19746.5	24056.4	17376.5	16004.4	14950	14227.9	2861.1	2110	3216.7	2986.9	2934.6	2683.7	4213.6	3960.8	2173.6	1498.4	8110	7488.8	2540.3	2000.2	1315.3	2217.2	2803.5	2637.5	1027.1	1390.3	19283.5	19758.9	14989.9	16798.1	4860.5	6302.2	2871.6	2580.8	9597.5	10357.7	1168	1297.8	3068.8	3620.7	1374	1950.7	2769.8	2593.4	3192.2
141.34	1446.5	1432.9	2189.8	2228.2	20257.7	22491.5	16712	16556.4	14979.4	15164.6	2855.2	2353.6	3544.6	3142.5	3537.2	2522.9	3851.5	3478.3	2282.6	1494.1	8879.9	7729	1846.8	1531.8	1408.3	2891.4	2861.8	2390.2	1652	1856.4	19692.5	17311.6	14559.7	16590	5688.8	6799.4	2688.4	2711.9	8573.1	11293	857.6	1390.9	3802.9	3480.8	1500.1	1697.9	2301.5	2599.4	3371.3
171.341	1711.7	1751.4	2267	1804.6	21458.7	21726.3	17328.4	16593.3	14868.9	13559	2538	2599.5	2620.7	3304.1	2913.9	2322.5	4482.7	3595.3	2045.7	1698	8935.8	7985.8	2073.5	1592	1713.8	2962.2	2774	2656.4	1540	1291.5	21360.3	18498.2	16792.4	14162.2	5509.4	6509.4	3123.1	1938.6	9264.8	10665.8	1631.4	1244.8	3424.6	2614.5	1639.1	2240.1	2567.6	2415.4	2976
201.341	1426.4	1619.9	2467.9	1926.8	24072.2	23513.2	17744.9	18083.3	15127.3	16004.2	2669.7	2031.7	3270.7	3229.6	2873.8	2263.9	4136.5	2877.4	1807.8	1758.8	8775.8	7844.6	2353.9	1760.8	1294.4	2757.8	2241.7	2674	1467.1	1725.2	19300.8	18527.3	14059.5	15596.9	5417.3	6094.8	2474	2569.5	9732.9	9378.8	1470	1585.2	2970.4	3024.3	1977.1	1438.4	1841.1	2067.4	3803.6
231.341	1635.4	2151.4	2330.4	2196.7	23189.6	21915.9	17065.4	18654.5	17401.1	15831.9	3006.3	2355.7	3307.4	2937.8	2741.6	2711	4092.9	2881.5	2236	1613.9	8599.8	6939	1872.1	2083.4	938.1	2283.9	2651.7	2822.5	1235.7	1395.5	20376.9	17501.1	14928.3	15842.7	5752.2	6691.5	3149.9	1866.7	10808.5	9275.9	1339.6	1568.4	3524.1	3000.6	1316.4	1893.7	2613.9	2454.6	3807
261.341	1361.7	1546.6	2466.4	2182	22743.5	21872.4	17416.9	18848.6	16293.8	15333	2985.5	2321.5	3115.6	2780.7	2984.1	2080.1	4314.7	2859.2	2128.5	1295.2	9313.4	7796.3	2171.6	1824.5	1354.5	1861.3	2255.2	2646.2	1482.9	1295.3	20908.9	17572.3	11359.3	14994.7	6281.8	6848.5	3342.4	2119.3	10705.7	10063.4	1797.6	1367.6	3360	3087.8	1634.5	1471.2	2453.3	2494.9	3163.7
291.341	1664.7	1670.4	2238.8	1902.2	23063.4	21350	17331.5	16857.9	16315.5	14572.4	2530.3	2204.8	2770.8	2703.5	2952.4	2067.1	3863.2	2450.6	2252.1	1266	10284	8104.3	1893.4	1409.2	1796.3	1328.3	2576	2797.1	1603.4	1686.8	22874.9	19732.3	11349.9	15006.2	5632.6	5803.2	3530	2180.8	9785.4	9394.6	1818.2	1194.3	2987	3278.5	1623.4	1490.5	2264.9	2407.9	3968.3
321.341	2036.3	2014	1845.1	1864.2	24044.5	22820.3	16806.8	18736	16016.7	15741.2	3007.4	2773.1	3198.4	3334.1	2754.5	2322.7	3686.4	2718.2	2383.6	1187.1	9391.1	6974.1	2235.5	1232.3	1442.3	1252.3	2698.7	2763.6	1927.3	1168.3	23376.2	19633.1	12528.8	15251.8	6845.4	6252.3	2690.8	2352.5	11363.5	10809.9	1722.4	1370.3	3322.7	3257.5	1846.7	1572.2	2585.1	2053.7	3277.4
351.351	1696	1868	2170.3	2471.6	22571.3	21702.7	16837.2	17980.3	16271	14553.4	3458.4	2305.9	2849.7	2949.2	3254.1	2367	3699.8	2405	3436.3	1134.7	8967.8	7133.6	1995.5	1060.5	1808.3	1309.9	3064.5	2059.8	1777.8	1739.6	23004.2	18219	14294.6	14097.8	6041	7709.8	2763.3	2224.4	11060.3	9394.1	1369.6	953.8	3200.5	3076.5	1466.9	1649.3	2161.4	2408.1	3464.1
381.351	1935.9	1299.6	2181.2	1880.3	24583.4	22069.4	16380.3	18388.3	15366.6	13818.3	2825	2281	3752.3	2485.6	2811.5	2586	3845.2	2680.7	2520	1545.9	9752.8	7059.9	2272.6	1122.4	1572.9	1829.3	2905.3	2399.3	1690.3	1777	21684	19167.6	14068.7	13009.7	5151.6	6481.2	2710.9	2074.6	11324.3	9483	2105.8	1154.4	3232.9	2555.4	1475.3	1871	2418.9	2508.2	3748
411.352	2033.6	1158.4	1880.4	1939.1	23662.3	23293.2	16662.9	19252.3	17188.7	14835.6	3381.2	2384.1	2904.6	2474.3	2517.9	2229.5	4255.6	2669.5	2530.7	1485.3	11165.4	7181.3	1826	1355.1	1469.3	1556.3	2640.1	2218.1	1776.1	1233.2	20676.7	18393.2	15064.7	14033.9	6480.3	6200.6	2568	2337.8	10918.1	8696.1	1784.3	1097.8	3264.1	3157.5	1440	1674.1	2560.5	2395.1	3607.9
441.352	1652.6	1951.5	1623.8	2733.8	24545.6	22460.9	16861.4	19094.1	17316.8	16334.8	2719.9	2667.8	2694.5	2602.2	2550	2121.2	3889.2	2297.4	2401	1509.8	10594.3	8155.1	2179	1205.2	1758	1196.2	2695.9	2407.3	1973.5	1359.9	23080.9	18299.6	15512.8	12493.9	6679.1	5757.4	2851.7	2495.7	9561.7	9411.2	1863.4	1345.7	3565.2	2759.7	1917.6	1853.6	2151.5	1935.4	3246.3
471.352	1673	1618.5	2101.5	1717.2	23415.2	18992	16619.4	18167.8	16635.6	12849.1	3050.3	2804	2793.1	2257.9	2578	1894.6	3708.3	2835.4	3222.2	1346.5	11749.5	7319.1	2795.7	1538.9	1651.2	1510.9	3057.4	2420.6	1901.5	1441.3	23355.2	19355	14196.8	11782.6	6524.1	6614.1	2930.8	2288.9	11421	8890.4	2041.9	1357.4	3682.2	3726.6	1853.1	1644.6	2851	2106.3	3135.6
501.352	1419.2	1201.5	1853.8	2202.1	22650.8	21272.2	15159.5	17708.6	17297.7	13406	2604.9	1987.5	2529.2	3184.4	3037.8	2247.6	3987.2	2583	3055.3	1443.2	10641.8	6317.6	2002	1156.2	1947.8	1416.3	2386.7	2436	1810	1346.7	22031.9	19185.8	14796.7	11918	6835.6	6721.2	3406.3	2311.8	10226.4	9554.4	1889.2	1093.8	3780.6	2822.2	1905.5	1664.5	2948.3	1366.2	3592.2
531.352	1595.1	1548.2	2132.9	1958	23087	22363	17454.8	18346.4	17199	13530.1	3021.8	2474.9	2461.1	2976.1	3004.5	2648.4	4699.6	2622.8	3300.8	1510.7	11446.8	6747.5	2199.1	1299	2090.8	1517.3	3164.9	2303.7	2263.1	1513.6	20486.3	20453.3	14780.6	11436.6	7385.7	6338	2379.9	1839.4	11662.2	9978.8	1695.8	1480.9	3806	3070.1	1842.1	1563.5	2871.7	1837.4	3604.1
561.362	1434.6	1405	2093.1	2431.7	23036.4	20868.4	14970.9	17374.5	15821.3	13776.3	2772.1	2035.1	2872	3148	2213.4	1623.8	4552.6	2372.6	2594.9	1700.9	11020.7	7677.6	2661.3	1293.4	2021	1298.7	3189.2	2034.2	2091.4	920.9	21402	19074	16027.6	12858.1	6763.2	6361.1	2175.2	2343.8	11521.5	9509	2574.7	1681.4	3179.3	3338.7	2025.9	1648.8	3352.8	1804.6	3532.7
591.362	1336.3	1503.7	1937.9	1775.4	23041.3	20697.6	18034.3	17768.3	17866.7	14189.7	2794.4	2374.6	2776.3	3224.9	2765.4	2786.6	4394.7	2412.1	2630.7	1648.5	9551.3	7581	2159.4	1209.2	2105.8	1093.6	3185.1	2307.2	1935.7	1137.2	21322.6	19061.7	13896.3	11356.2	7331	5937.9	2100.9	1860.5	10646.4	9894.8	2253.3	1264.7	3509.6	2668.2	1484.6	1382.6	3523.2	2095.6	3150.5
621.362	1585.2	1103.8	1977.2	2242	23587.7	21037.2	18204.5	19038.3	17334.9	14541.2	2990.5	1983.4	3439.4	2480.4	3235.8	2792.2	4016.9	2539.9	2932.7	1515.1	9224.4	7863.2	1726.2	1189.9	2122.6	1186.1	3237.5	2219.5	2126.7	1283.4	21566.3	19083.1	15331.8	10878.7	7970	5975.1	2966.5	2131.2	10233.1	10571.8	2293.8	1048.9	4216.3	3046.4	1770.1	1682.4	3637.3	2037	2782.7
651.362	1904.7	1032.2	1933	2248	22314.6	21735.7	17116	17693.4	15753.1	12796	2562.1	2323.3	2891.2	3179	3182.6	2095.5	4142.4	2844.3	2790.3	1674.1	9770.1	7433.4	1647.9	1137.3	2269.1	1510.5	2955.7	2007	2109.5	1039.7	22491	20339.5	14703.6	11069.6	8119.7	6395.6	2443.9	1976	10414.8	9260.3	2091.4	1424	3768.3	3026.7	2260.5	1411.3	2650	1576.1	3680.1
681.363	2187.1	1405.1	1940.1	1977	22318.1	22487.5	16962.3	19016.8	16261.4	13915.8	3167.3	2193.1	3203.3	2912.9	3054.3	2534.7	4749.9	2755.3	2082.3	1521.4	10379.7	7204	1535.9	1527.3	1734	1217	3188.7	1576	2037.8	1477.4	23183.6	20487.7	14531.6	11793.6	7411.4	5939.6	3521.3	2330.1	11388.8	9173.1	2030.3	1238.2	4087.4	3698.6	2149	1298.9	2585.5	1602.3	4104.2
711.363	1819.7	1074.7	1930.9	2299.4	21443.3	19397	18840.6	20416.6	14507.8	14331.8	2878.6	2556.6	3661.6	3159.5	2814.6	2291.8	5023.2	3163.4	2874.9	1281.9	9746.8	7333.5	1694.3	1254.2	2560	1603.8	3557.8	2084.6	2129.4	1179.7	23200.5	21395	15731.4	11234.3	7930.5	5611.3	3638	2522.2	10101	10147.1	2352.7	1167.8	4240.6	2752.8	1541.4	1610.2	2762.1	1835.1	3497.9
741.363	1867	908.4	2158.9	2468.7	23454	22271.7	17124.7	18642.8	15517	13703.5	3295.2	2677.5	3156.3	2852.4	3037.2	2035	4410.5	2520.6	2941.4	1635.1	9020.2	8293.9	2286.2	1335.3	2040.2	1242.2	2800.5	2060	1745.2	1239.7	22483.5	19689.5	15377.3	12873	7664.3	5461.2	3588.9	2199.2	10662.4	9383.9	2686.7	1151.2	4422.5	3002	1990.9	1816.7	2443	2202.5	3269.4
771.363	1772.1	970.5	1902.7	1790.7	21676.9	20131.8	16076	19215.1	15515.7	14091.9	2944.9	2153.5	3128.1	2734.9	3174.6	2404.9	4657.6	2788.8	2343.6	1549	10200.1	7859.9	1967.8	1191.2	1928.9	1571.1	3334.4	2689.3	2020.4	1082.6	23276.2	18619.8	15443.6	12826.5	8311.7	5516.6	3507.6	2358.5	10408.8	9459.7	2422.6	1158.3	3869.4	2688.5	2527.3	1431.3	2908.6	2053.8	3850.2
801.363	1996.4	949.7	1396.8	2458.8	21517.6	19946.4	17005.2	18510.2	14656.7	15098.4	2800.4	2313.5	3345.6	2896.5	2945.4	2474.4	4832.1	2384.4	2693.7	1521.9	9477	8219.1	2763.4	1333.8	1989.1	1626.9	2618.6	2265	1782	1135.6	20918.4	21483.4	14868.9	12778.5	8651.1	5182.1	3550.1	2230.9	10203.8	8583.2	2934.9	1000.4	4038.1	2888.9	2168	1298.9	2503.7	2118.7	3481.4
831.373	1696.9	944.1	1966.5	1679.2	20807.2	20104.1	17301.6	19580.6	16017.9	13620.5	2646.3	1678.8	2544.3	2220.1	3513.8	2188.6	3703.5	2795.7	2440.9	1473.9	9974.4	7257.6	2242.6	1610	1953.5	1615.4	3585.4	2289.4	2513.9	1351.7	23852.1	19432.4	15931.2	11172.1	9489.3	5716.7	3321.1	2157	11684.4	8971.7	2702	860.5	3667.5	2657.9	2078.5	1248.5	3084.7	2406	3622.5
861.373	1997.7	1142.3	2103.6	2407.8	20597.4	21465.4	17299.4	18682.2	16152.6	13349	2976.6	2436.6	2796.9	3066.5	3412.9	2326.3	3670.9	2820.9	2750	1875.1	9731.9	7983.5	2127.2	1328.3	2554.7	1711.4	2997.7	2718.8	1998.3	1324.2	22195.5	18779.9	16928	11901.4	9072.5	5787.1	2983.9	1995.2	10927	8988.6	3176.2	1295.3	3909	2770.7	2662.1	1800.5	2833.8	2133.1	4033.9
891.373	2634.5	1245.8	2057.4	2080.8	20032.3	19577.4	16131.3	19729.3	15203.4	13324.3	3325.8	2479.6	3782.8	2984.5	3616	1761.6	4518.2	2115.1	2099.5	2241.8	9446	7678.9	2219.7	1603.4	2378.5	1426.7	2730	2472.7	2002.7	1423.4	22133.7	21054.6	16008.4	12079.8	9209.2	4480	3443.2	2075.1	10674.8	10455.9	3457.5	1462.6	4295.7	2928.8	2442.5	1782.8	2703.7	2049.9	3723.6
	0 = mean of signal before frap
Ploted data	Calculation of total # cells in all fields
	1	2	3	4	5	6	7	8	9	10	11	12	13	14	15	16	17	18	19	20	21	22	23	24	25	26	27	28	29	30	31	32	33	34	35	36
0	106.246	97.3523	98.5006	98.5364	101.535	98.8257	103.772	103.896	107.082	110.621	96.4058	99.1101	93.3425	101.527	100.464	98.2167	97.3986	101.393	97.3271	96.7923	93.3471	98.8217	99.6903	97.1822	99.2939	99.0678	98.2439	90.8246	89.7689	130.413	96.7769	#DIV/0!	#DIV/0!	#DIV/0!
16.1	66.61	69.4183	101.586	82.8551	77.6912	125.626	64.8044	77.4618	84.4449	71.3468	68.6233	91.4763	58.0148	74.8302	56.6204	57.0676	100.754	65.8653	73.9695	59.2811	76.2914	55.202	75.3533	60.9082	64.6407	62.4032	67.0601	66.4924	89.6911	67.6036	63.8558	#DIV/0!	#DIV/0!	#DIV/0!
21.33	71.6274	106.378	103.344	97.2095	81.865	99.2111	85.5846	94.0646	97.4372	85.7131	64.5875	77.3533	40.8383	77.8534	59.5174	67.6917	82.0778	76.065	85.7005	66.6594	95.9935	60.8455	75.8971	93.3688	70.8341	52.1095	86.5787	101.561	82.5551	88.5025	74.0179
51.33	91.7653	98.5724	91.7892	110.994	101.941	113.807	93.9984	113.01	97.8003	138.884	95.8084	113.167	46.6876	84.1879	106.933	88.4008	86.4064	101.54	113.384	78.8484	80.6024	102.981	72.4551	106.73	102.941	75.8414	100.428	63.7176	119.811	73.9526	87.8647
81.34	107.85	116.889	96.8766	103.834	101.411	126.864	73.5205	108.721	106.749	133.169	97.2667	96.1794	67.2932	82.0566	105.184	103.168	103.962	81.159	150.244	91.9678	69.5639	92.6302	71.7131	119.44	112.004	131.7	72.8713	115.349	104.361	73.4224	86.1963
111.34	107.615	81.6436	82.0842	108.573	105.075	135.597	107.694	109.349	106.383	145.061	108.295	127.002	59.3226	106.294	73.8761	97.594	89.2357	77.1239	111.268	92.6605	89.9985	84.7571	70.4363	106.802	112.771	114.361	88.6921	79.9667	125.768	96.9838	89.9054
141.34	100.949	98.2766	90.0682	100.94	98.7787	121.312	112.796	140.204	110.729	152.774	114.891	120.564	48.7065	119.731	88.9894	113.753	87.7619	83.6662	99.1334	75.9152	61.6579	109.254	88.3503	88.5397	114.999	97.1299	87.7455	99.096	72.0474	86.0233	85.9242
171.341	97.7332	125.623	98.7683	104.43	109.661	97.6342	79.3166	125.464	124.682	120.477	111.896	130.245	57.8556	104.427	119.241	115.472	118.572	84.6376	161.101	86.8646	131.057	130.985	73.1708	106.301	91.3724	89.935	84.3087	117.372	78.7784	101.966	98.6252
201.341	88.0548	128.083	102.377	98.1287	94.5208	131.402	101.273	126.94	143.758	102.786	111.871	133.684	46.936	83.8332	85.0394	104.175	90.1429	88.884	96.2833	103.776	92.7328	98.2178	137.451	89.0539	132.212	107.69	183.143	119.096	101.653	81.3477	105.511
231.341	76.0156	106.086	105.812	91.4814	109.912	127.618	112.581	101.129	142.041	138.546	123.934	89.8579	41.0745	93.9486	88.5489	116.432	94.2283	85.9628	168.742	116.522	85.4119	117.447	69.5147	106.49	150.504	165.216	108.145	155.604	83.9282	92.1979	101.188
261.341	88.0447	113.034	103.983	92.4042	106.266	128.602	112.044	143.459	150.906	164.338	119.459	119.024	72.7717	85.2241	114.483	118.988	75.7554	91.7252	157.712	106.383	131.442	108.815	111.1	98.3326	109.255	131.752	116.117	142.345	92.492	110.431	84.0389
291.341	99.6588	117.695	108.025	102.809	111.962	114.763	102.489	142.828	157.643	177.891	126.896	134.36	135.233	92.0954	95.0557	115.926	75.6347	97.0602	161.867	104.16	152.24	91.1087	108.916	94.0612	150.943	165.876	112.885	173.78	154.584	125.209	108.637
321.341	101.107	98.9754	105.365	89.7032	101.75	108.449	95.9299	118.59	135.619	200.792	134.657	181.409	115.172	97.6516	164.966	119.065	82.1464	109.486	114.38	105.121	125.695	102.002	117.46	125.875	123.457	189.7	119.81	155.812	135.971	104.895	102.485
351.351	90.7923	87.8095	104.002	93.6425	111.802	149.98	96.6262	137.478	153.838	302.838	125.712	188.166	138.049	148.777	102.196	126.265	101.396	78.3548	124.227	117.737	143.594	104.031	88.9408	89.7554	115.113	202.981	115.896	150.712	182.114	143.249	112.543
381.351	148.961	116.003	111.391	89.08	111.205	123.849	150.962	108.72	143.44	163.012	138.144	202.477	85.9837	121.089	95.121	113.128	108.14	79.4853	130.671	119.417	182.415	126.512	78.8509	96.4397	147.154	217.548	93.617	188.669	119.755	182.927	108.802
411.352	175.552	96.9728	101.585	86.5502	115.861	141.823	117.391	112.936	159.416	170.383	155.479	134.75	94.4098	119.025	144.024	112.415	107.345	104.511	109.847	125.552	162.534	103.376	86.0164	106.906	114.5	275.641	71.443	230.469	100.419	137.957	114.033
441.352	84.6836	59.3972	109.281	88.3069	106.012	101.953	103.547	120.215	169.287	159.028	129.91	180.8	146.965	111.989	145.121	126.128	124.163	116.009	114.265	101.599	138.471	129.188	103.453	111.166	117.449	276.799	95.1473	267.261	87.5285	118.856	155.53
471.352	103.367	122.379	123.29	91.4772	129.469	108.784	123.703	136.071	130.786	239.302	160.532	181.669	109.286	126.308	131.93	120.668	120.49	98.6393	128.044	128.464	150.427	98.8086	112.678	135.356	150.079	201.419	78.9441	173.813	124.452	138.191	131.643
501.352	118.119	84.1833	106.481	85.6053	129.03	131.064	79.4247	135.158	154.363	211.703	168.447	173.153	137.527	97.9762	134.403	114.834	124.154	101.702	147.344	107.033	172.719	133.959	114.479	215.803	135.955	235.216	126.654	204.83	121.567	138.445	99.1287
531.352	103.029	108.933	103.237	95.1402	127.117	122.098	82.6955	113.446	179.183	218.495	169.645	169.292	137.797	137.383	149.518	100.161	129.239	116.53	129.385	116.87	114.511	123.97	117.819	156.291	101.111	252.297	92.7141	145.066	129.84	131.444	123.966
561.362	102.107	86.0756	110.389	86.1659	114.844	136.214	91.2325	136.31	191.882	152.56	143.544	205.76	155.617	156.779	227.104	112.205	124.65	106.321	92.8066	121.164	153.128	95.2257	122.871	185.792	115.312	239.688	60.0029	261.979	183.092	176.232	129.553
591.362	88.8675	109.153	111.324	101.497	125.913	117.679	86.0895	99.2392	182.194	159.581	125.99	178.581	192.557	138.05	170.216	111.861	122.368	123.461	112.921	107.596	178.169	131.534	107.377	168.124	109.545	268.215	110.74	222.107	137.585	101.196	132.11
621.362	143.613	88.1891	112.124	95.6204	119.212	150.776	138.663	115.887	158.152	193.565	117.311	145.071	178.956	145.866	165.708	113.013	140.934	133.387	139.194	96.7962	218.686	138.403	105.213	178.562	93.0762	228.769	78.9023	211.015	204.258	143.867	128.534
651.362	184.528	85.9875	102.663	96.7366	123.11	110.278	90.9468	151.878	145.639	166.675	131.435	144.896	150.222	147.27	202.895	110.578	132.829	126.958	123.679	112.467	146.868	124.502	160.171	168.137	144.556	285.086	100.108	244.052	123.65	134.448	127.396
681.363	155.654	98.1335	99.2467	89.1964	116.856	144.421	109.969	120.499	172.391	136.867	144.082	100.563	142.482	202.329	137.932	113.159	123.216	124.779	151.122	124.154	163.972	110.512	165.448	161.362	152.692	339.563	111.033	246.793	155.024	114.774	136.536
711.363	169.322	83.9741	110.55	92.2808	101.228	112.595	115.892	122.812	158.791	224.269	132.908	135.09	159.621	170.671	180.504	108.439	140.03	141.331	144.239	99.5457	201.464	154.047	95.7272	150.515	102.922	277.916	91.1456	239.696	232.756	184.201	126.314
741.363	205.526	87.4509	105.309	91.8569	113.234	123.07	110.654	149.248	174.978	179.891	108.757	171.212	164.241	135.947	140.776	114.19	119.454	140.341	163.191	113.624	233.383	147.318	109.589	110.919	120.776	280.712	140.612	231.56	162.496	132.216	124.13
771.363	182.597	106.255	107.675	83.6634	110.104	136.749	114.377	132.005	167.011	151.298	129.774	165.195	122.774	123.988	186.625	125.008	120.404	150.667	148.722	110.033	209.151	143.924	176.574	141.62	140.595	232.379	130.738	225.489	163.375	153.242	128.408
801.363	210.214	56.8082	107.877	91.8693	97.0745	121.046	115.505	119.035	202.655	176.996	115.305	207.182	122.263	115.611	156.921	97.3701	116.359	166.942	159.133	118.881	293.373	139.78	166.91	118.172	123.577	288.588	205.023	213.403	200.678	196.72	145.201
831.373	179.737	117.109	103.497	88.3609	117.601	157.63	114.603	160.55	132.471	165.608	137.434	139.292	120.93	156.609	185.981	122.744	142.598	165.993	153.968	130.236	314.003	137.985	166.48	128.209	132.994	336.376	147.631	177.185	180.692	130.467	134.242
861.373	174.884	87.3661	95.9563	92.5983	121.002	122.162	91.2082	146.709	130.132	146.659	121.9	160.145	149.275	110.258	150.906	118.188	142.235	156.771	149.554	121.565	245.21	141.083	147.853	132.849	131.762	260.16	148.345	210.236	146.643	156.074	157.356
891.373	211.471	98.8754	102.324	81.7632	114.103	134.126	126.748	205.268	213.616	93.6524	123.012	138.437	166.713	110.406	140.698	105.125	132.522	205.562	165.929	102.094	236.394	146.671	137.004	131.894	128.258	305.789	150.685	310.471	149.012	157.627	179.708
Channel,001 - GFP	RAW DATA imported LAS AF software																												Channel,001
Axis [s]	ROI1 []	ROI2 []	ROI3 []	ROI4 []	ROI5 []	ROI6 []	ROI7 []	ROI8 []	ROI9 []	ROI10 []	ROI11 []	ROI12 []	ROI13 []	ROI14 []	ROI15 []	ROI16 []	ROI17 []	ROI18 []	ROI19 []	ROI20 []	ROI21 []	ROI22 []	ROI23 []	ROI24 []	ROI25 []	ROI26 []	ROI27 []	ROI28 []	Axis [s]	ROI1 []	ROI2 []	ROI3 []	ROI4 []	ROI5 []	ROI6 []	ROI7 []	ROI8 []	ROI9 []	ROI10 []	ROI11 []	ROI12 []	ROI13 []	ROI14 []	ROI15 []	ROI16 []	ROI17 []	ROI18 []	ROI19 []	ROI20 []
0	1594.4	2289.4	26626	19356.8	17576.4	3973.9	3718.8	3477.2	4210.7	1753.9	8275.7	2499.8	2126.2	3100.6	1600.2	2192.9	27651.9	19160.9	15477.9	3329.3	3663.5	2923.6	4330.8	1379.3	8528.4	2221.5	2326.2	3156.3	0	1520.7	22228	19015.4	6668	2878.4	10681.1	1103.3	3976.6	1774.1	2900.3	3702.6	1763.8	2384.9	1809	965.9	3735.4	8384.4	1626.6	22879.8	19093.2
5.17	1931.8	2049.3	27585.2	18653.7	16419.8	3129	3690.3	2780.9	4709.9	1997.8	8043.1	2255.8	1658	2983.1	1718.7	2263.8	27384.5	19414.2	18004.3	3858	3476.3	3099.8	3999.8	2012.2	8398.8	2576.8	1727.9	2835.9	5.16	1643.6	20969	17904.5	6851.9	2845.7	12143.3	1103.8	3722.7	2055.9	2686.9	3553.3	2115.3	1855.8	1483.3	1023.2	3596.3	7649.3	1523.1	21101.5	18812.8
16.1	1175	1702.9	22648.3	14249.5	10878.4	2780.1	2221.3	2165.6	2583	1171.8	5214	1910.3	1012.3	2060.3	1764	2453.1	22294.8	17198.1	14002.1	2213	3427.7	2795.7	3058.8	1642.4	7598	2088.3	1744.9	2753.3	15.63	918.1	11932.9	16293.7	4030.3	2243.2	6768.3	914.2	1932.4	1333	1542.5	2227	1370.5	1210.1	1093.6	766.5	1748.5	4732.8	1621.5	20910.1	16171.8
21.33	1116.6	2123.3	24023.4	15014.5	12834.8	2452.2	2723.9	2337.6	3258.3	1990.6	5682.8	1954.1	941.2	1911.3	1558.9	1996	23246	15445.5	15678	2471.7	3182.7	2485.1	3344	2322.4	8798.6	2526.2	2304.7	2455	20.91	932.4	13627.7	14856.5	4589	1952.6	7952.6	1011.1	2299.9	1398.1	2226.1	2604.5	1170.9	1345	1529.4	723.1	2104.5	5669.4	1566.6	20132	18100.5
51.33	1628.1	2188.8	23451.4	16631.9	14921.4	2629.5	3107.4	2818.7	3583.6	2149.5	6564.6	2263.8	1101.5	2464.6	1774.2	2220.5	25549.2	14984.5	14637.3	2310.5	3305.8	2494.2	3664.2	1547.7	6851.8	2000.4	2359.3	2927.5	50.91	1397.4	17564.7	15448.6	5730.6	2536.4	8403.5	1027.6	3285.3	1372.3	2719.9	3581	1356.5	1854.2	1361.9	1207.1	1908.2	7802.3	1306.8	19869.4	17879
81.34	1400	2117.1	22139.2	17543.1	15314.9	2884	2710.7	2651.7	4325.8	1867.7	7989	1792.4	1267.4	2252.7	1298.1	1811.2	22853	16895.3	15101.8	2273.3	3687	2439	4052.3	1402.5	8213.5	1863.6	1883.4	2745.3	80.91	1481.1	20203.7	17364.2	4939.5	2862.3	9445	942.8	2973.8	1234.9	2849.6	3623	1785.2	1499.4	1463.9	1196.4	2170	7239.8	1408.1	19583.3	16702.4
111.34	1585.6	1781.3	19746.5	17376.5	14950	2861.1	3216.7	2934.6	4213.6	2173.6	8110	2540.3	1315.3	2803.5	1473.4	2181.8	24056.4	16004.4	14227.9	2110	2986.9	2683.7	3960.8	1498.4	7488.8	2000.2	2217.2	2637.5	110.91	1027.1	19283.5	14989.9	4860.5	2871.6	9597.5	1168	3068.8	1374	2769.8	3192.2	1283.7	1822.8	1007.1	1171.4	2057.9	7795.7	1390.3	19758.9	16798.1
141.34	1446.5	2189.8	20257.7	16712	14979.4	2855.2	3544.6	3537.2	3851.5	2282.6	8879.9	1846.8	1408.3	2861.8	1432.9	2228.2	22491.5	16556.4	15164.6	2353.6	3142.5	2522.9	3478.3	1494.1	7729	1531.8	2891.4	2390.2	140.91	1652	19692.5	14559.7	5688.8	2688.4	8573.1	857.6	3802.9	1500.1	2301.5	3371.3	1137.1	1684.1	1523.7	698.5	2239.1	6536.6	1856.4	17311.6	16590
171.341	1711.7	2267	21458.7	17328.4	14868.9	2538	2620.7	2913.9	4482.7	2045.7	8935.8	2073.5	1713.8	2774	1751.4	1804.6	21726.3	16593.3	13559	2599.5	3304.1	2322.5	3595.3	1698	7985.8	1592	2962.2	2656.4	170.91	1540	21360.3	16792.4	5509.4	3123.1	9264.8	1631.4	3424.6	1639.1	2567.6	2976	1384.1	1894.5	1780.3	780.3	2422.4	7776.6	1291.5	18498.2	14162.2
201.341	1426.4	2467.9	24072.2	17744.9	15127.3	2669.7	3270.7	2873.8	4136.5	1807.8	8775.8	2353.9	1294.4	2241.7	1619.9	1926.8	23513.2	18083.3	16004.2	2031.7	3229.6	2263.9	2877.4	1758.8	7844.6	1760.8	2757.8	2674	200.911	1467.1	19300.8	14059.5	5417.3	2474	9732.9	1470	2970.4	1977.1	1841.1	3803.6	1567	2299	1664.6	768.7	2342	7682.6	1725.2	18527.3	15596.9
231.341	1635.4	2330.4	23189.6	17065.4	17401.1	3006.3	3307.4	2741.6	4092.9	2236	8599.8	1872.1	938.1	2651.7	2151.4	2196.7	21915.9	18654.5	15831.9	2355.7	2937.8	2711	2881.5	1613.9	6939	2083.4	2283.9	2822.5	230.911	1235.7	20376.9	14928.3	5752.2	3149.9	10808.5	1339.6	3524.1	1316.4	2613.9	3807	1700.4	1962.3	2011.8	780.7	2564.3	7655.1	1395.5	17501.1	15842.7
261.341	1361.7	2466.4	22743.5	17416.9	16293.8	2985.5	3115.6	2984.1	4314.7	2128.5	9313.4	2171.6	1354.5	2255.2	1546.6	2182	21872.4	18848.6	15333	2321.5	2780.7	2080.1	2859.2	1295.2	7796.3	1824.5	1861.3	2646.2	260.911	1482.9	20908.9	11359.3	6281.8	3342.4	10705.7	1797.6	3360	1634.5	2453.3	3163.7	1752.3	1824.2	2152.4	984.3	2688	6970.1	1295.3	17572.3	14994.7
291.341	1664.7	2238.8	23063.4	17331.5	16315.5	2530.3	2770.8	2952.4	3863.2	2252.1	10284	1893.4	1796.3	2576	1670.4	1902.2	21350	16857.9	14572.4	2204.8	2703.5	2067.1	2450.6	1266	8104.3	1409.2	1328.3	2797.1	290.921	1603.4	22874.9	11349.9	5632.6	3530	9785.4	1818.2	2987	1623.4	2264.9	3968.3	2292.4	1744.3	2012.2	1396.2	2890.7	7572.1	1686.8	19732.3	15006.2
321.341	2036.3	1845.1	24044.5	16806.8	16016.7	3007.4	3198.4	2754.5	3686.4	2383.6	9391.1	2235.5	1442.3	2698.7	2014	1864.2	22820.3	18736	15741.2	2773.1	3334.1	2322.7	2718.2	1187.1	6974.1	1232.3	1252.3	2763.6	320.921	1927.3	23376.2	12528.8	6845.4	2690.8	11363.5	1722.4	3322.7	1846.7	2585.1	3277.4	2394.2	1576.1	2516.2	1163.1	2738.6	7601.4	1168.3	19633.1	15251.8
351.351	1696	2170.3	22571.3	16837.2	16271	3458.4	2849.7	3254.1	3699.8	3436.3	8967.8	1995.5	1808.3	3064.5	1868	2471.6	21702.7	17980.3	14553.4	2305.9	2949.2	2367	2405	1134.7	7133.6	1060.5	1309.9	2059.8	350.921	1777.8	23004.2	14294.6	6041	2763.3	11060.3	1369.6	3200.5	1466.9	2161.4	3464.1	2669.6	2061.9	2412.3	1399	3063.1	8256.3	1739.6	18219	14097.8
381.351	1935.9	2181.2	24583.4	16380.3	15366.6	2825	3752.3	2811.5	3845.2	2520	9752.8	2272.6	1572.9	2905.3	1299.6	1880.3	22069.4	18388.3	13818.3	2281	2485.6	2586	2680.7	1545.9	7059.9	1122.4	1829.3	2399.3	380.921	1690.3	21684	14068.7	5151.6	2710.9	11324.3	2105.8	3232.9	1475.3	2418.9	3748	2633.2	1878.8	2542.5	1104.5	3935.3	8100	1777	19167.6	13009.7
411.352	2033.6	1880.4	23662.3	16662.9	17188.7	3381.2	2904.6	2517.9	4255.6	2530.7	11165.4	1826	1469.3	2640.1	1158.4	1939.1	23293.2	19252.3	14835.6	2384.1	2474.3	2229.5	2669.5	1485.3	7181.3	1355.1	1556.3	2218.1	410.921	1776.1	20676.7	15064.7	6480.3	2568	10918.1	1784.3	3264.1	1440	2560.5	3607.9	3162.7	1341.2	2548.3	1151.5	3362.7	9462.9	1233.2	18393.2	14033.9
441.352	1652.6	1623.8	24545.6	16861.4	17316.8	2719.9	2694.5	2550	3889.2	2401	10594.3	2179	1758	2695.9	1951.5	2733.8	22460.9	19094.1	16334.8	2667.8	2602.2	2121.2	2297.4	1509.8	8155.1	1205.2	1196.2	2407.3	440.922	1973.5	23080.9	15512.8	6679.1	2851.7	9561.7	1863.4	3565.2	1917.6	2151.5	3246.3	2881.2	1637.2	2699.6	1150.3	2955	10377.1	1359.9	18299.6	12493.9
471.352	1673	2101.5	23415.2	16619.4	16635.6	3050.3	2793.1	2578	3708.3	3222.2	11749.5	2795.7	1651.2	3057.4	1618.5	1717.2	18992	18167.8	12849.1	2804	2257.9	1894.6	2835.4	1346.5	7319.1	1538.9	1510.9	2420.6	470.922	1901.5	23355.2	14196.8	6524.1	2930.8	11421	2041.9	3682.2	1853.1	2851	3135.6	3122.2	1537.2	2836.8	1454.6	3251.5	10884.8	1441.3	19355	11782.6
501.352	1419.2	1853.8	22650.8	15159.5	17297.7	2604.9	2529.2	3037.8	3987.2	3055.3	10641.8	2002	1947.8	2386.7	1201.5	2202.1	21272.2	17708.6	13406	1987.5	3184.4	2247.6	2583	1443.2	6317.6	1156.2	1416.3	2436	500.922	1810	22031.9	14796.7	6835.6	3406.3	10226.4	1889.2	3780.6	1905.5	2948.3	3592.2	3043.7	2193.4	3057.3	1338.7	2943.9	8931.4	1346.7	19185.8	11918
531.352	1595.1	2132.9	23087	17454.8	17199	3021.8	2461.1	3004.5	4699.6	3300.8	11446.8	2199.1	2090.8	3164.9	1548.2	1958	22363	18346.4	13530.1	2474.9	2976.1	2648.4	2622.8	1510.7	6747.5	1299	1517.3	2303.7	530.922	2263.1	20486.3	14780.6	7385.7	2379.9	11662.2	1695.8	3806	1842.1	2871.7	3604.1	3190.3	1712.8	2179.9	1346.7	3093	10714.1	1513.6	20453.3	11436.6
561.362	1434.6	2093.1	23036.4	14970.9	15821.3	2772.1	2872	2213.4	4552.6	2594.9	11020.7	2661.3	2021	3189.2	1405	2431.7	20868.4	17374.5	13776.3	2035.1	3148	1623.8	2372.6	1700.9	7677.6	1293.4	1298.7	2034.2	560.932	2091.4	21402	16027.6	6763.2	2175.2	11521.5	2574.7	3179.3	2025.9	3352.8	3532.7	3192.4	1240.8	3086.9	1767.2	3455.9	10687.6	920.9	19074	12858.1
591.362	1336.3	1937.9	23041.3	18034.3	17866.7	2794.4	2776.3	2765.4	4394.7	2630.7	9551.3	2159.4	2105.8	3185.1	1503.7	1775.4	20697.6	17768.3	14189.7	2374.6	3224.9	2786.6	2412.1	1648.5	7581	1209.2	1093.6	2307.2	590.932	1935.7	21322.6	13896.3	7331	2100.9	10646.4	2253.3	3509.6	1484.6	3523.2	3150.5	3615	1768.4	2591.1	1611.4	2816.9	9869.3	1137.2	19061.7	11356.2
621.362	1585.2	1977.2	23587.7	18204.5	17334.9	2990.5	3439.4	3235.8	4016.9	2932.7	9224.4	1726.2	2122.6	3237.5	1103.8	2242	21037.2	19038.3	14541.2	1983.4	2480.4	2792.2	2539.9	1515.1	7863.2	1189.9	1186.1	2219.5	620.932	2126.7	21566.3	15331.8	7970	2966.5	10233.1	2293.8	4216.3	1770.1	3637.3	2782.7	3766	1289.5	2352.4	1890	3546.6	10623.3	1283.4	19083.1	10878.7
651.362	1904.7	1933	22314.6	17116	15753.1	2562.1	2891.2	3182.6	4142.4	2790.3	9770.1	1647.9	2269.1	2955.7	1032.2	2248	21735.7	17693.4	12796	2323.3	3179	2095.5	2844.3	1674.1	7433.4	1137.3	1510.5	2007	650.932	2109.5	22491	14703.6	8119.7	2443.9	10414.8	2091.4	3768.3	2260.5	2650	3680.1	3396.8	1478	2517.4	1399.1	3330	10266.5	1039.7	20339.5	11069.6
681.363	2187.1	1940.1	22318.1	16962.3	16261.4	3167.3	3203.3	3054.3	4749.9	2082.3	10379.7	1535.9	1734	3188.7	1405.1	1977	22487.5	19016.8	13915.8	2193.1	2912.9	2534.7	2755.3	1521.4	7204	1527.3	1217	1576	680.933	2037.8	23183.6	14531.6	7411.4	3521.3	11388.8	2030.3	4087.4	2149	2585.5	4104.2	3728.4	1730.9	2258.9	1721.7	3110.5	11503	1477.4	20487.7	11793.6
711.363	1819.7	1930.9	21443.3	18840.6	14507.8	2878.6	3661.6	2814.6	5023.2	2874.9	9746.8	1694.3	2560	3557.8	1074.7	2299.4	19397	20416.6	14331.8	2556.6	3159.5	2291.8	3163.4	1281.9	7333.5	1254.2	1603.8	2084.6	710.933	2129.4	23200.5	15731.4	7930.5	3638	10101	2352.7	4240.6	1541.4	2762.1	3497.9	3402.8	1370.1	2268	2057.1	3731	9548.7	1179.7	21395	11234.3
741.363	1867	2158.9	23454	17124.7	15517	3295.2	3156.3	3037.2	4410.5	2941.4	9020.2	2286.2	2040.2	2800.5	908.4	2468.7	22271.7	18642.8	13703.5	2677.5	2852.4	2035	2520.6	1635.1	8293.9	1335.3	1242.2	2060	740.933	1745.2	22483.5	15377.3	7664.3	3588.9	10662.4	2686.7	4422.5	1990.9	2443	3269.4	3516.2	1618.3	2359.6	1950.6	3361.6	11106.4	1239.7	19689.5	12873
771.363	1772.1	1902.7	21676.9	16076	15515.7	2944.9	3128.1	3174.6	4657.6	2343.6	10200.1	1967.8	1928.9	3334.4	970.5	1790.7	20131.8	19215.1	14091.9	2153.5	2734.9	2404.9	2788.8	1549	7859.9	1191.2	1571.1	2689.3	770.943	2020.4	23276.2	15443.6	8311.7	3507.6	10408.8	2422.6	3869.4	2527.3	2908.6	3850.2	3205.2	1915.7	2767.2	1920.8	3604.4	10304.9	1082.6	18619.8	12826.5
801.363	1996.4	1396.8	21517.6	17005.2	14656.7	2800.4	3345.6	2945.4	4832.1	2693.7	9477	2763.4	1989.1	2618.6	949.7	2458.8	19946.4	18510.2	15098.4	2313.5	2896.5	2474.4	2384.4	1521.9	8219.1	1333.8	1626.9	2265	800.943	1782	20918.4	14868.9	8651.1	3550.1	10203.8	2934.9	4038.1	2168	2503.7	3481.4	3856.4	2694	2240.3	2073.2	4144.5	12067.2	1135.6	21483.4	12778.5
831.373	1696.9	1966.5	20807.2	17301.6	16017.9	2646.3	2544.3	3513.8	3703.5	2440.9	9974.4	2242.6	1953.5	3585.4	944.1	1679.2	20104.1	19580.6	13620.5	1678.8	2220.1	2188.6	2795.7	1473.9	7257.6	1610	1615.4	2289.4	830.943	2513.9	23852.1	15931.2	9489.3	3321.1	11684.4	2702	3667.5	2078.5	3084.7	3622.5	3040.5	2318.7	2260	1753.8	3197.1	11336.1	1351.7	19432.4	11172.1
861.373	1997.7	2103.6	20597.4	17299.4	16152.6	2976.6	2796.9	3412.9	3670.9	2750	9731.9	2127.2	2554.7	2997.7	1142.3	2407.8	21465.4	18682.2	13349	2436.6	3066.5	2326.3	2820.9	1875.1	7983.5	1328.3	1711.4	2718.8	860.943	1998.3	22195.5	16928	9072.5	2983.9	10927	3176.2	3909	2662.1	2833.8	4033.9	3479.9	2250.4	2255.2	1638	3782.3	12206.9	1324.2	18779.9	11901.4
891.373	2634.5	2057.4	20032.3	16131.3	15203.4	3325.8	3782.8	3616	4518.2	2099.5	9446	2219.7	2378.5	2730	1245.8	2080.8	19577.4	19729.3	13324.3	2479.6	2984.5	1761.6	2115.1	2241.8	7678.9	1603.4	1426.7	2472.7	890.943	2002.7	22133.7	16008.4	9209.2	3443.2	10674.8	3457.5	4295.7	2442.5	2703.7	3723.6	3803.4	2682.2	2333.5	1575.8	4288.4	12246.9	1423.4	21054.6	12079.8
[truncated: 15 more columns]

## Sheet: RR4
REORGANIZED DATA FROM 3 FIELDS	CELL FRAP	CONTROL	CELL FRAP	CONTROL	CELL FRAP	CONTROL	CELL FRAP	CONTROL	CELL FRAP	CONTROL	CELL FRAP	CONTROL	CELL FRAP	CONTROL	CELL FRAP	CONTROL	CELL FRAP	CONTROL	CELL FRAP	CONTROL	CELL FRAP	CONTROL	CELL FRAP	CONTROL	CELL FRAP	CONTROL	CELL FRAP	CONTROL	CELL FRAP	CONTROL	CELL FRAP	CONTROL	CELL FRAP	CONTROL	CELL FRAP	CONTROL	CELL FRAP	CONTROL	CELL FRAP	CONTROL	CELL FRAP	CONTROL	CELL FRAP	CONTROL	CELL FRAP	CONTROL	CELL FRAP	CONTROL	CELL FRAP
Axis [s] - TIME	ROI1 []	ROI14 []	ROI2 []	ROI15 []	ROI3 []	ROI16 []	ROI4 []	ROI17 []	ROI5 []	ROI18 []	ROI6 []	ROI19 []	ROI7 []	ROI20 []	ROI8 []	ROI21 []	ROI9 []	ROI22 []	ROI10 []	ROI23 []	ROI11 []	ROI24 []	ROI12 []	ROI25 []	ROI13 []	ROI26 []	ROI1 []	ROI11 []	ROI2 []	ROI12 []	ROI3 []	ROI13 []	ROI4 []	ROI14 []	ROI5 []	ROI15 []	ROI6 []	ROI16 []	ROI7 []	ROI17 []	ROI8 []	ROI18 []	ROI9 []	ROI19 []	ROI10 []	ROI20 []
0	9.92308	9.46154	6.69231	7.07692	13.4615	13.3846	8.07692	8	16.6923	14.9231	15.2308	16.0769	10.1538	10.2308	33.3077	28.3077	51.5385	52.5385	52.8462	50.3846	39.5385	42.6923	25.7692	26.9231	8.15385	8.15385	40.3077	43.2308	16.0769	15.4615	11.3077	11.3846	7.30769	7.15385	5.61538	6.69231	55.5385	56.7692	29.4615	30.3846	20.2308	18.7692	12.9231	14	17.6154	16.6923
5.17	8.76923	9.07692	7.53846	7.38462	11.5385	12.1538	7.15385	8.30769	13.7692	14.7692	18.6923	16.8462	7.07692	8.07692	31.2308	29.9231	51.2308	50.6154	45.3846	46.4615	39.5385	39.5385	24.0769	24.1538	8.69231	7.30769	37.3846	36.0769	15.6154	16.6154	11	11	7.76923	8.07692	5.92308	6.15385	55	54.7692	30.5385	29.9231	18.3846	20.2308	13.0769	12.8462	18.0769	18.5385
17.33	6.38462	7.69231	4.84615	6.69231	9.61538	12.7692	4.84615	5.07692	11.7692	13.4615	10.5385	13	6.07692	9.84615	19.0769	23.4615	31.6923	49.6923	31.2308	48.2308	27.4615	30	16.3077	21.2308	6.46154	9.15385	30.3077	33.1538	10.2308	12.3077	8.76923	10	4.53846	7	4.23077	5.07692	38	52.3077	20.3846	31.5385	13.8462	19.5385	9.23077	11.0769	10.7692	16.4615
22.56	6.92308	9.76923	6.53846	8.15385	10.8462	13.6923	4.38462	7.15385	11.6154	12.5385	13.0769	11.6154	6.92308	9.53846	19.3077	24.4615	32.6154	44.5385	37.4615	46.6923	27.8462	33.0769	17.5385	18.8462	6.84615	6.84615	30.6923	33	13.7692	12.1538	6.92308	9.53846	6	7.61538	4.38462	5.76923	40.7692	51	22.8462	33.2308	14.2308	19.8462	9.69231	10.3077	11.8462	15.1538
52.571	9.07692	8.53846	5.30769	5.84615	11.1538	12.7692	7.15385	7.07692	12.6923	10.1538	13.7692	13.5385	7.23077	9.53846	26.0769	23.8462	36.3077	45.6154	40.6923	47.8462	32.0769	31.8462	20.1538	18.5385	7	8.15385	36.7692	35.3846	13.2308	10.6154	9.38462	9.07692	5.69231	6.84615	6.61538	6.23077	42.4615	46.8462	23.6923	32	17.6154	17.6154	11.6154	10.6923	14.8462	15.6154
82.571	9.15385	6.92308	5.84615	6.61538	12.4615	11.2308	5.84615	6	12.3077	11	15.3077	12.2308	7.53846	12.3846	26.0769	22.6923	36	43.4615	39.3077	47.7692	32.0769	33.4615	19.9231	20.2308	7.15385	6.69231	33.2308	34.9231	15.3846	12.3846	8.92308	10.3077	5.38462	6.92308	4.84615	5.69231	48.2308	46.0769	21.8462	27.1538	17.0769	19.6154	11.1538	11.6154	13	14.6923
112.571	8.46154	9.23077	5.38462	7.76923	10.6154	11.8462	6.23077	8.15385	11.3077	11.5385	13.7692	14.0769	7.69231	10.7692	27.1538	25.5385	33.7692	42.6923	40.4615	44.6923	35.2308	32.6923	20.9231	19.1538	6.61538	9.92308	35.6154	36.9231	16.3846	14	8.46154	8.53846	6.84615	7.53846	4.38462	5.38462	45.1538	48.6923	30.3846	27.2308	17.3077	18.1538	11	11.3077	12.3846	15.0769
142.571	9.69231	8.69231	6.92308	6.92308	11.2308	12.3846	7.07692	6.53846	14	10.3077	14.1538	14.5385	7.92308	9.23077	22.4615	24.2308	33	43.2308	40.2308	43.6923	31.3846	32.7692	20.8462	19.4615	9.69231	8.53846	38.3077	33.0769	14.3846	12.5385	7.76923	9	6.38462	7.23077	5.30769	5.69231	47.0769	44.6923	22.3077	26.5385	17.9231	16.9231	12.3846	9.84615	13.3077	16.2308
172.571	8.92308	9.61538	7.38462	5.76923	11.3846	10.6923	6.53846	6.84615	13.3077	8.92308	15	13.4615	9.15385	11.1538	25.2308	25.0769	34.2308	40.3846	39	43	35.2308	35.2308	22.1538	19.9231	9.46154	7.76923	38	35.9231	14	11.5385	9.07692	8.61538	5.92308	7.46154	5.30769	5.92308	48.9231	44.6923	24.6923	23	20.6923	18.7692	13.9231	10.8462	13.6154	15.0769
202.571	8.15385	8.76923	7.30769	6.46154	10.6923	14.5385	6.92308	7.30769	14.0769	9.15385	15.0769	13.0769	10	10.3077	26.8462	25.4615	27.1538	41.4615	38.2308	43.7692	32.0769	35.4615	18.3077	19.9231	8.92308	7.30769	37.0769	35.9231	14.2308	10.6154	9.84615	8.46154	5.23077	7.53846	6.07692	4.76923	43.6154	46.0769	27.0769	21.8462	17.0769	17.0769	12.0769	9.76923	13.3846	14.6923
232.571	8.46154	7.76923	7.23077	7.76923	10.1538	11.6923	8.15385	7.84615	13.9231	11.0769	14.4615	13.9231	9.23077	10.2308	25.7692	26	26.1538	42	34.3077	46.4615	31.8462	39.9231	19.3846	21.3077	9.30769	6.76923	36.7692	33.4615	13.6923	12.6923	10.6154	8.30769	6	6.38462	5.07692	4.23077	42.7692	45.7692	29.3077	20.7692	17.5385	17.6154	12.9231	9.07692	13.6923	13.5385
262.571	8.76923	10.0769	7.76923	7.38462	10.1538	13.1538	7.23077	7.76923	15.2308	11.5385	13.2308	10.8462	9.38462	11.3077	24.4615	26.8462	28.8462	38.7692	35.6923	41.2308	29.3846	37.3846	20.3077	19.8462	8.38462	6.53846	38.7692	33.2308	12.7692	11.8462	10.6923	8.61538	4.92308	5.92308	6	4.38462	43.3846	40.9231	30.5385	22.6154	17.6923	14.5385	11.0769	9.61538	12.6923	14.3077
292.581	8.92308	8.53846	8.61538	7.84615	12.6923	12.3077	6.76923	7.30769	14.0769	10.1538	15.6154	13.5385	8.15385	11.3077	22.5385	26.2308	28.6923	42.0769	35.6923	41.9231	34.1538	37.3846	20.8462	19.3846	9.30769	5.92308	38.8462	33	13.3846	14.8462	11.9231	10.5385	6.61538	6.30769	5.76923	5.30769	43.5385	42.1538	29.6154	24.3077	17.6923	15.6154	10.5385	10.5385	13.2308	15.0769
322.582	10.0769	7.61538	7.92308	5.61538	10.9231	14.3077	6.76923	6.61538	17.6923	9.46154	16	11.6154	9.92308	11.7692	27.3846	26.5385	34.6154	41.6154	34.0769	40.1538	35.9231	32.8462	19.2308	19.6154	9.38462	8	38.6154	34.1538	14.4615	14.5385	9.84615	9.46154	6.46154	6.53846	5.53846	4.53846	36.9231	39.8462	32.3077	21.7692	17.8462	15.9231	11.6923	10.3077	13	15
352.582	8.46154	9	8.30769	7.07692	12.9231	13.2308	6.61538	6.61538	15.7692	9.69231	15.4615	11.9231	10.0769	11.5385	30.4615	26.7692	28.3077	35.3846	34.8462	38.7692	29.4615	35.3077	20	23	9.07692	7.46154	38.3846	33.6923	10.2308	12	9.69231	7.46154	6.23077	7.15385	6.53846	4.69231	35.9231	38.2308	32.1538	24.3846	20.1538	14.6923	9.76923	8.46154	14.5385	16.1538
382.582	9	8.23077	7.23077	6.23077	11.8462	13.4615	7.69231	6.23077	13	9.30769	15.3846	13.3846	10.2308	9.92308	22.8462	28.6154	35.5385	39.3077	37.1538	39.7692	31.6154	32.6923	19.5385	21.5385	8.76923	6.92308	38	34.3077	12.8462	12.8462	10.1538	8.30769	5.84615	7.69231	6.15385	4.76923	38.6154	41.8462	33.0769	24.6923	17	15.7692	11.3077	8.61538	14.5385	14.2308
412.582	8.23077	10	8	6.84615	10.5385	14.3077	7.46154	6.30769	14.2308	9.23077	17.3846	13.7692	9.76923	9.46154	25.6923	27.6154	32	35.3077	36.9231	40.4615	33.7692	31.0769	18.0769	22.1538	9.76923	7.69231	35.4615	29.3846	12.8462	13.3846	12.8462	7.61538	6	5.69231	5.76923	4.69231	41.1538	37.0769	30.3077	27.5385	20.3846	14.3846	10.8462	8.69231	13.4615	13.7692
442.582	7.07692	6.76923	8.61538	6	10.5385	13.8462	7.23077	5.84615	15.7692	10	15.5385	11.6154	10.8462	10.3846	26	27.3077	33.5385	34.3077	40.2308	40.5385	33.5385	30.0769	19.9231	17.9231	7.84615	7.30769	39.3077	35.6154	12.2308	12.4615	10.3846	8.69231	6.84615	5.69231	5.61538	4.76923	37.6154	36.4615	30.4615	23.0769	19.7692	17.6154	12	9.69231	15.1538	14.3846
472.582	8.61538	8.07692	8.07692	7.61538	10.6923	13.1538	7.53846	5.84615	12.7692	9.53846	16.1538	13.8462	11.5385	9.30769	25.9231	29.1538	31.2308	33.5385	38	36.9231	32.4615	29.4615	20.8462	21.6923	9.38462	7	35.5385	33.3846	11.3077	12.2308	10.7692	9.30769	7.15385	6.76923	6.23077	4.53846	41.2308	37	28.3077	22.6154	17.9231	15.5385	11.3846	8.76923	14.4615	16.6154
502.582	8.46154	8.30769	9	6.76923	12.3077	12.0769	7.76923	5.46154	13.0769	8.61538	17.6154	10.7692	9.53846	9.30769	25.6154	27.8462	34.8462	35.8462	48.0769	37.0769	30.7692	29.3077	19.7692	18.6154	9.69231	6.46154	36.3077	30.2308	11.6923	13.0769	9.69231	7.92308	7.38462	5.15385	5.23077	4.69231	40.6154	33	30.8462	22.3846	19.7692	14.8462	10	8.69231	15.6154	15.3846
532.592	9.30769	7.46154	10.3077	6.07692	14.1538	15.4615	6.61538	5.84615	12.5385	8.30769	18.6154	12.5385	12.6154	10.6923	25.6154	27.5385	32.9231	33.5385	39.3077	33.9231	31.9231	28.0769	23	19.3846	8.92308	6.84615	35.0769	29.3077	12.7692	11.7692	10.3077	7.23077	7.07692	5.76923	5.38462	3.76923	39.3846	37.3846	34.6923	21.2308	18.3846	12.8462	9.84615	8.30769	15.0769	14.3846
562.593	9.46154	7.84615	8.46154	6.23077	11.0769	16.4615	8.69231	5.23077	12.3077	8.38462	15.3077	10.1538	9	9.46154	25.5385	27.8462	39	37	41.0769	35.3077	29.6154	28.6923	19.8462	17.6154	9.92308	6.23077	36.7692	30.3077	11.3077	12.6923	10.3077	8.46154	7.92308	6.61538	5.07692	4.53846	41.1538	33.7692	32.6154	22.1538	17.1538	14.3077	9.76923	7.46154	14.6154	13.0769
592.593	7.84615	6.69231	10.2308	5.23077	12.4615	14.4615	7.38462	5.61538	13	8.61538	16.5385	10.5385	11	9.30769	29.5385	31.8462	37.2308	36.6923	39.8462	39	32.3077	29.4615	21.3077	17.1538	8.84615	6.76923	32.3077	30.1538	10.3846	11.6923	10.0769	8.69231	7.61538	6.23077	5.07692	4.76923	37.9231	36.9231	34.5385	25.1538	18.6154	13.4615	11.3846	8.30769	13.3846	13.3077
622.593	9.76923	8.53846	10.3077	4.38462	14.2308	13.0769	7.76923	5.53846	12	10.9231	15	12.6154	10.6154	10.4615	29.6154	24.0769	38.1538	36.8462	38.3846	34.0769	28.0769	30.2308	20.8462	20	9.92308	6.15385	33.5385	26.4615	12.1538	12.7692	10.3077	8.46154	6.30769	6.38462	5	4.30769	41.6154	38.4615	31	25.7692	20.5385	13.4615	11.1538	7.61538	13.0769	13.3846
652.593	9.23077	6.76923	12.2308	6	14.8462	12.7692	8.38462	6.07692	13.6154	9.84615	15.5385	12.0769	12.3846	10.6923	26.6923	27.5385	37.6154	32.1538	43.6154	36.7692	27.4615	30.6923	22.3077	17.6154	8.69231	7.07692	34.1538	30	11.6154	9.30769	10.8462	7.84615	6.61538	6.23077	5.84615	4.15385	41	33.0769	31	24.7692	16.6923	13.5385	11.6154	7.53846	14.6154	12.7692
682.593	9.53846	6.38462	13.2308	5.92308	12.7692	14.6154	7.76923	6.23077	12.4615	11.2308	15.7692	10.7692	11	9	24.1538	26.3077	39.5385	30.9231	41.4615	35.6923	28.3077	31.4615	22	18.5385	8.84615	7.61538	31.8462	27.5385	10.8462	9.61538	9.61538	7.76923	7.76923	5.38462	5	3.76923	44.2308	31.3077	31.6923	24.3077	17.1538	11.3846	10.9231	7.76923	16.0769	14.0769
712.593	9	6.84615	10.6154	5.23077	14.6154	12.3077	8	4.46154	15.2308	10.1538	16.9231	11.7692	11.4615	8.07692	26.6154	23.6154	37.9231	30.6154	37.5385	36.2308	29.4615	29.2308	21.5385	17.9231	11.3846	5.76923	36	25.5385	12.6154	10.3846	9.76923	7.69231	6.61538	6.15385	5.69231	4.92308	36.3077	31.7692	27	25.9231	18	12.6154	10.7692	6.84615	15.1538	15.1538
742.593	9.84615	6.46154	11.3846	5.53846	12.8462	14.6923	8.30769	6.30769	14.9231	9.38462	14.8462	10.8462	9.61538	8.92308	29	24.3846	43.7692	32.3846	36.3077	34.2308	27	26.0769	22	18.9231	9.84615	5.69231	33.8462	25.7692	12.6154	11.3077	9.38462	7.30769	7.15385	5.30769	5.92308	4.61538	39.2308	35.6923	30.0769	25.3077	18.6923	13.0769	12.2308	8.30769	14.6923	14
772.593	9	7.15385	11.6154	5.69231	14.3077	12.5385	10.0769	6.46154	15.0769	9.84615	17.8462	14.3077	11.2308	9.61538	26.3846	25.0769	40	30.6154	38.6923	35	29.0769	30.9231	20.5385	16.9231	11.6923	4.84615	33.4615	27.1538	10.7692	10.1538	9.84615	7.23077	7.92308	5.15385	5.46154	4.53846	39.7692	34.6154	29.2308	24.2308	16.9231	13.5385	12.6923	6.69231	16.4615	14
802.604	8.46154	6.46154	12.0769	6.69231	14.8462	14.7692	7.84615	6	12.6154	8.15385	16.3077	11.3077	12.2308	9.92308	24.1538	23.6154	37.2308	33.7692	37	31.0769	26	27.0769	20.8462	18.4615	10.7692	7.61538	32.3077	26.7692	12.3077	10.3846	9.15385	6.76923	6.84615	5.07692	5.53846	4.69231	42.6923	33.7692	28.6923	25.5385	18.7692	12.9231	10.9231	7.30769	17.3846	15.9231
832.604	10	5.69231	9.76923	5.53846	15.3846	13.6923	9.07692	6.76923	14	10.3846	15.7692	11.8462	12	8.84615	25.6154	24.0769	34.7692	30.4615	40.7692	29.6154	28.0769	27.5385	21.6154	18.7692	12.9231	6.30769	32.4615	26.6154	11.3077	9.76923	10.8462	7.23077	6.76923	6.23077	5.53846	4.92308	39.9231	35.4615	31.3846	24.6923	17.3077	14.4615	10.4615	7.07692	14.3846	12.3846
862.604	7.69231	6.53846	12.6154	5.30769	12.9231	12.3077	8.38462	5	16.6923	12	16	12.4615	10.6154	8.30769	23.8462	29.2308	38.4615	29.3846	42.3077	32.3846	24.6923	27.0769	22.5385	15.9231	10.7692	6.61538	31.5385	24.8462	10.2308	9.53846	10.7692	7.53846	7	5.53846	6.15385	4	42.6154	34	29.5385	24.0769	16.1538	13.3077	11	6.38462	17.7692	14.5385
892.604	8.30769	6.07692	12.5385	4.53846	12.2308	13.4615	7.76923	4.46154	16.2308	9.53846	16	12.3846	11.3077	8.07692	24.4615	24.9231	32.6923	30.7692	38	35.6154	25.4615	22.9231	20.4615	17.3077	14.1538	5.76923	30.9231	24.7692	12	11.1538	10	6.84615	7.15385	4.69231	5.61538	5.38462	35	31.7692	33.1538	23.6154	17.3077	13	11.3077	6.53846	17.3846	13
	0 = mean of signal before frap
Ploted data	Calculation of total # cells in all fields
	1	2	3	4	5	6	7	8	9	10	11	12	13	14	15	16	17	18	19	20	21	22	23	24	25	26	27	28	29	30	31	32	33	34	35	36
0	100.83	98.4043	97.8916	93.3962	102.591	103.037	94.1176	110.832	99.6271	101.43	96.1646	97.5904	108.955	97.9631	98.801	99.6564	98.9899	89.8204	99.1034	99.4898	99.0138	96.8481	101.31	#DIV/0!	#DIV/0!	#DIV/0!	#DIV/0!	#DIV/0!	#DIV/0!	#DIV/0!	#DIV/0!	#DIV/0!	#DIV/0!	#DIV/0!
17.33	83	72.4138	75.3012	95.4545	87.4286	81.0651	61.7188	81.3115	63.7771	64.7528	91.5385	76.8116	70.5882	91.4153	83.125	87.6923	64.8352	83.3333	72.6471	64.6341	70.8661	83.3333	65.4206	#DIV/0!	#DIV/0!	#DIV/0!	#DIV/0!	#DIV/0!	#DIV/0!	#DIV/0!	#DIV/0!	#DIV/0!	#DIV/0!	#DIV/0!
22.56	70.8661	80.1887	79.2135	61.2903	92.638	112.583	72.5806	78.9308	73.2297	80.2306	84.186	93.0612	100	93.007	113.291	72.5806	78.7879	76	79.9397	68.75	71.7054	94.0299	78.1726
52.571	106.306	90.7895	87.3494	101.087	125	101.705	75.8065	109.355	79.5953	85.0482	100.725	108.714	85.8491	103.913	124.638	103.39	83.1461	106.173	90.6404	74.0385	100	108.633	95.0739
82.571	132.222	88.3721	110.959	97.4359	111.888	125.157	60.8696	114.915	82.8319	82.2866	95.8621	98.4791	106.897	95.1542	124.224	86.5672	77.7778	85.1351	104.674	80.4533	87.0588	96.0265	88.4817
112.571	91.6667	69.3069	89.6104	76.4151	98	97.8142	71.4286	106.325	79.0991	90.5336	107.765	109.237	66.6667	96.4583	117.033	99.0991	90.8163	81.4286	92.733	111.582	95.339	97.2789	82.1429
142.571	111.504	100	90.6832	108.235	135.821	97.3545	85.8333	92.6984	76.3345	92.0775	95.7746	107.115	113.514	115.814	114.724	86.3248	88.2979	93.2432	105.336	84.058	105.909	125.781	81.9905
172.571	92.8	128	106.475	95.5056	149.138	111.429	82.069	100.613	84.7619	90.6977	100	111.197	121.782	105.782	121.333	105.357	79.3814	89.6104	109.466	107.358	110.246	128.369	90.3061
202.571	92.9825	113.095	73.545	94.7368	153.782	115.294	97.0149	105.438	65.4917	87.3462	90.4555	91.8919	122.105	103.212	134.058	116.364	69.3878	127.419	94.6578	123.944	100	123.622	91.0995
232.571	108.911	93.0693	86.8421	103.922	125.694	103.867	90.2256	99.1124	62.2711	73.8411	79.7688	90.9747	137.5	109.885	107.879	127.778	93.9759	120	93.4454	141.111	99.5633	142.373	101.136
262.571	87.0229	105.208	77.193	93.0693	132	121.986	82.9932	91.1175	74.4048	86.5672	78.6008	102.326	128.235	116.667	107.792	124.107	83.1169	136.842	106.015	135.034	121.693	115.2	88.7097
292.581	104.505	109.804	103.125	92.6316	138.636	115.341	72.1088	85.9238	68.1901	85.1376	91.358	107.54	157.143	117.716	90.1554	113.139	104.878	108.696	103.285	121.835	113.3	100	87.7551
322.582	132.323	141.096	76.3441	102.326	186.992	137.748	84.3137	103.188	83.1793	84.8659	109.368	98.0392	117.308	113.063	99.4709	104.065	98.8235	122.034	92.6641	148.41	112.077	113.433	86.6667
352.582	94.0171	117.391	97.6744	100	162.698	129.677	87.3333	113.793	80	89.881	83.4423	86.9565	121.649	113.927	85.2564	129.897	87.0968	139.344	93.9638	131.861	137.173	115.455	90
382.582	109.346	116.049	88	123.457	139.669	114.943	103.101	79.8387	90.411	93.4236	96.7059	90.7143	126.667	110.762	100	122.222	76	129.032	92.2794	133.956	107.805	131.25	102.162
412.582	82.3077	116.854	73.6559	118.293	154.167	126.257	103.252	93.0362	90.6318	91.2548	108.663	81.5972	127	120.681	95.977	168.687	105.405	122.951	110.996	110.056	141.711	124.779	97.7654
442.582	104.545	143.59	76.1111	123.684	157.692	133.775	104.444	95.2113	97.7578	99.241	111.509	111.159	107.368	110.367	98.1481	119.469	120.27	117.742	103.165	132	112.227	123.81	105.348
472.582	106.667	106.061	81.2865	128.947	133.871	116.667	123.967	88.9182	93.1193	102.917	110.183	96.0993	134.066	106.452	92.4528	115.702	105.682	137.288	111.435	125.17	115.347	129.825	87.037
502.582	101.852	132.955	101.911	142.254	151.786	163.571	102.479	91.989	97.2103	129.668	104.987	106.198	150	120.102	89.4118	122.33	143.284	111.475	123.077	137.801	133.161	115.044	101.5
532.592	124.742	169.62	91.5423	113.158	150.926	148.466	117.986	93.0168	98.1651	115.873	113.699	118.651	130.337	119.685	108.497	142.553	122.667	142.857	105.35	163.406	143.114	118.519	104.813
562.593	120.588	135.802	67.2897	166.176	146.789	150.758	95.122	91.7127	105.405	116.34	103.217	112.664	159.259	121.32	89.0909	121.818	119.767	111.864	121.868	147.222	119.892	130.928	111.765
592.593	117.241	195.588	86.1702	131.507	150.893	156.934	118.182	92.7536	101.468	102.17	109.661	124.215	130.682	107.143	88.8158	115.929	122.222	106.452	102.708	137.309	138.286	137.037	100.578
622.593	114.414	235.088	108.824	140.278	109.859	118.902	101.471	123.003	103.549	112.641	92.8753	104.231	161.25	126.744	95.1807	121.818	98.7952	116.071	108.2	120.299	152.571	146.465	97.7011
652.593	136.364	203.846	116.265	137.975	138.281	128.662	115.827	96.9274	116.986	118.619	89.4737	126.638	122.826	113.846	124.793	138.235	106.173	140.741	123.953	125.155	123.295	154.082	114.458
682.593	149.398	223.377	87.3684	124.691	110.959	146.429	122.222	91.8129	127.861	116.164	89.9756	118.672	116.162	115.642	112.8	123.762	144.286	132.653	141.278	130.38	150.676	140.594	114.208
712.593	131.461	202.941	118.75	179.31	150	143.791	141.905	112.704	123.869	103.609	100.789	120.172	197.333	140.964	121.481	127	107.5	115.625	114.286	104.154	142.683	157.303	100
742.593	152.381	205.556	87.4346	131.707	159.016	136.879	107.759	118.927	135.154	106.067	103.54	116.26	172.973	131.343	111.565	128.421	134.783	128.333	109.914	118.845	142.941	147.222	104.945
772.593	125.806	204.054	114.11	155.952	153.125	124.731	116.8	105.215	130.653	110.549	94.0299	121.364	241.27	123.229	106.061	136.17	153.731	120.339	114.889	120.635	125	189.655	117.582
802.604	130.952	180.46	100.521	130.769	154.717	144.218	123.256	102.28	110.251	119.059	96.0227	112.917	141.414	120.69	118.519	135.227	134.848	118.033	126.424	112.349	145.238	149.474	109.179
832.604	175.676	176.389	112.36	134.091	134.815	133.117	135.652	106.39	114.141	137.662	101.955	115.164	204.878	121.965	115.748	150	108.642	112.5	112.581	127.103	119.681	147.826	116.149
862.604	117.647	237.681	105	167.692	139.103	128.395	127.778	81.5789	130.89	130.641	91.1932	141.546	162.791	126.935	107.258	142.857	126.389	153.846	125.339	122.684	121.387	172.289	122.222
892.604	136.709	276.271	90.8571	174.138	170.161	129.193	140	98.1481	106.25	106.695	111.074	118.222	245.333	124.845	107.586	146.067	152.459	104.286	110.169	140.391	133.136	172.941	133.728
Channel,001 - GFP	RAW DATA imported LAS AF software																										Channel,001
Axis [s]	ROI1 []	ROI2 []	ROI3 []	ROI4 []	ROI5 []	ROI6 []	ROI7 []	ROI8 []	ROI9 []	ROI10 []	ROI11 []	ROI12 []	ROI13 []	ROI14 []	ROI15 []	ROI16 []	ROI17 []	ROI18 []	ROI19 []	ROI20 []	ROI21 []	ROI22 []	ROI23 []	ROI24 []	ROI25 []	ROI26 []	Axis [s]	ROI1 []	ROI2 []	ROI3 []	ROI4 []	ROI5 []	ROI6 []	ROI7 []	ROI8 []	ROI9 []	ROI10 []	ROI11 []	ROI12 []	ROI13 []	ROI14 []	ROI15 []	ROI16 []	ROI17 []	ROI18 []	ROI19 []	ROI20 []
0	9.92308	6.69231	13.4615	8.07692	16.6923	15.2308	10.1538	33.3077	51.5385	52.8462	39.5385	25.7692	8.15385	9.46154	7.07692	13.3846	8	14.9231	16.0769	10.2308	28.3077	52.5385	50.3846	42.6923	26.9231	8.15385	0	40.3077	16.0769	11.3077	7.30769	5.61538	55.5385	29.4615	20.2308	12.9231	17.6154	43.2308	15.4615	11.3846	7.15385	6.69231	56.7692	30.3846	18.7692	14	16.6923
5.17	8.76923	7.53846	11.5385	7.15385	13.7692	18.6923	7.07692	31.2308	51.2308	45.3846	39.5385	24.0769	8.69231	9.07692	7.38462	12.1538	8.30769	14.7692	16.8462	8.07692	29.9231	50.6154	46.4615	39.5385	24.1538	7.30769	5.16	37.3846	15.6154	11	7.76923	5.92308	55	30.5385	18.3846	13.0769	18.0769	36.0769	16.6154	11	8.07692	6.15385	54.7692	29.9231	20.2308	12.8462	18.5385
17.33	6.38462	4.84615	9.61538	4.84615	11.7692	10.5385	6.07692	19.0769	31.6923	31.2308	27.4615	16.3077	6.46154	7.69231	6.69231	12.7692	5.07692	13.4615	13	9.84615	23.4615	49.6923	48.2308	30	21.2308	9.15385	16	30.3077	10.2308	8.76923	4.53846	4.23077	38	20.3846	13.8462	9.23077	10.7692	33.1538	12.3077	10	7	5.07692	52.3077	31.5385	19.5385	11.0769	16.4615
22.56	6.92308	6.53846	10.8462	4.38462	11.6154	13.0769	6.92308	19.3077	32.6154	37.4615	27.8462	17.5385	6.84615	9.76923	8.15385	13.6923	7.15385	12.5385	11.6154	9.53846	24.4615	44.5385	46.6923	33.0769	18.8462	6.84615	21.31	30.6923	13.7692	6.92308	6	4.38462	40.7692	22.8462	14.2308	9.69231	11.8462	33	12.1538	9.53846	7.61538	5.76923	51	33.2308	19.8462	10.3077	15.1538
52.571	9.07692	5.30769	11.1538	7.15385	12.6923	13.7692	7.23077	26.0769	36.3077	40.6923	32.0769	20.1538	7	8.53846	5.84615	12.7692	7.07692	10.1538	13.5385	9.53846	23.8462	45.6154	47.8462	31.8462	18.5385	8.15385	51.31	36.7692	13.2308	9.38462	5.69231	6.61538	42.4615	23.6923	17.6154	11.6154	14.8462	35.3846	10.6154	9.07692	6.84615	6.23077	46.8462	32	17.6154	10.6923	15.6154
82.571	9.15385	5.84615	12.4615	5.84615	12.3077	15.3077	7.53846	26.0769	36	39.3077	32.0769	19.9231	7.15385	6.92308	6.61538	11.2308	6	11	12.2308	12.3846	22.6923	43.4615	47.7692	33.4615	20.2308	6.69231	81.31	33.2308	15.3846	8.92308	5.38462	4.84615	48.2308	21.8462	17.0769	11.1538	13	34.9231	12.3846	10.3077	6.92308	5.69231	46.0769	27.1538	19.6154	11.6154	14.6923
112.571	8.46154	5.38462	10.6154	6.23077	11.3077	13.7692	7.69231	27.1538	33.7692	40.4615	35.2308	20.9231	6.61538	9.23077	7.76923	11.8462	8.15385	11.5385	14.0769	10.7692	25.5385	42.6923	44.6923	32.6923	19.1538	9.92308	111.31	35.6154	16.3846	8.46154	6.84615	4.38462	45.1538	30.3846	17.3077	11	12.3846	36.9231	14	8.53846	7.53846	5.38462	48.6923	27.2308	18.1538	11.3077	15.0769
142.571	9.69231	6.92308	11.2308	7.07692	14	14.1538	7.92308	22.4615	33	40.2308	31.3846	20.8462	9.69231	8.69231	6.92308	12.3846	6.53846	10.3077	14.5385	9.23077	24.2308	43.2308	43.6923	32.7692	19.4615	8.53846	141.31	38.3077	14.3846	7.76923	6.38462	5.30769	47.0769	22.3077	17.9231	12.3846	13.3077	33.0769	12.5385	9	7.23077	5.69231	44.6923	26.5385	16.9231	9.84615	16.2308
172.571	8.92308	7.38462	11.3846	6.53846	13.3077	15	9.15385	25.2308	34.2308	39	35.2308	22.1538	9.46154	9.61538	5.76923	10.6923	6.84615	8.92308	13.4615	11.1538	25.0769	40.3846	43	35.2308	19.9231	7.76923	171.31	38	14	9.07692	5.92308	5.30769	48.9231	24.6923	20.6923	13.9231	13.6154	35.9231	11.5385	8.61538	7.46154	5.92308	44.6923	23	18.7692	10.8462	15.0769
202.571	8.15385	7.30769	10.6923	6.92308	14.0769	15.0769	10	26.8462	27.1538	38.2308	32.0769	18.3077	8.92308	8.76923	6.46154	14.5385	7.30769	9.15385	13.0769	10.3077	25.4615	41.4615	43.7692	35.4615	19.9231	7.30769	201.311	37.0769	14.2308	9.84615	5.23077	6.07692	43.6154	27.0769	17.0769	12.0769	13.3846	35.9231	10.6154	8.46154	7.53846	4.76923	46.0769	21.8462	17.0769	9.76923	14.6923
232.571	8.46154	7.23077	10.1538	8.15385	13.9231	14.4615	9.23077	25.7692	26.1538	34.3077	31.8462	19.3846	9.30769	7.76923	7.76923	11.6923	7.84615	11.0769	13.9231	10.2308	26	42	46.4615	39.9231	21.3077	6.76923	231.311	36.7692	13.6923	10.6154	6	5.07692	42.7692	29.3077	17.5385	12.9231	13.6923	33.4615	12.6923	8.30769	6.38462	4.23077	45.7692	20.7692	17.6154	9.07692	13.5385
262.571	8.76923	7.76923	10.1538	7.23077	15.2308	13.2308	9.38462	24.4615	28.8462	35.6923	29.3846	20.3077	8.38462	10.0769	7.38462	13.1538	7.76923	11.5385	10.8462	11.3077	26.8462	38.7692	41.2308	37.3846	19.8462	6.53846	261.311	38.7692	12.7692	10.6923	4.92308	6	43.3846	30.5385	17.6923	11.0769	12.6923	33.2308	11.8462	8.61538	5.92308	4.38462	40.9231	22.6154	14.5385	9.61538	14.3077
292.581	8.92308	8.61538	12.6923	6.76923	14.0769	15.6154	8.15385	22.5385	28.6923	35.6923	34.1538	20.8462	9.30769	8.53846	7.84615	12.3077	7.30769	10.1538	13.5385	11.3077	26.2308	42.0769	41.9231	37.3846	19.3846	5.92308	291.321	38.8462	13.3846	11.9231	6.61538	5.76923	43.5385	29.6154	17.6923	10.5385	13.2308	33	14.8462	10.5385	6.30769	5.30769	42.1538	24.3077	15.6154	10.5385	15.0769
322.582	10.0769	7.92308	10.9231	6.76923	17.6923	16	9.92308	27.3846	34.6154	34.0769	35.9231	19.2308	9.38462	7.61538	5.61538	14.3077	6.61538	9.46154	11.6154	11.7692	26.5385	41.6154	40.1538	32.8462	19.6154	8	321.321	38.6154	14.4615	9.84615	6.46154	5.53846	36.9231	32.3077	17.8462	11.6923	13	34.1538	14.5385	9.46154	6.53846	4.53846	39.8462	21.7692	15.9231	10.3077	15
352.582	8.46154	8.30769	12.9231	6.61538	15.7692	15.4615	10.0769	30.4615	28.3077	34.8462	29.4615	20	9.07692	9	7.07692	13.2308	6.61538	9.69231	11.9231	11.5385	26.7692	35.3846	38.7692	35.3077	23	7.46154	351.321	38.3846	10.2308	9.69231	6.23077	6.53846	35.9231	32.1538	20.1538	9.76923	14.5385	33.6923	12	7.46154	7.15385	4.69231	38.2308	24.3846	14.6923	8.46154	16.1538
382.582	9	7.23077	11.8462	7.69231	13	15.3846	10.2308	22.8462	35.5385	37.1538	31.6154	19.5385	8.76923	8.23077	6.23077	13.4615	6.23077	9.30769	13.3846	9.92308	28.6154	39.3077	39.7692	32.6923	21.5385	6.92308	381.321	38	12.8462	10.1538	5.84615	6.15385	38.6154	33.0769	17	11.3077	14.5385	34.3077	12.8462	8.30769	7.69231	4.76923	41.8462	24.6923	15.7692	8.61538	14.2308
412.582	8.23077	8	10.5385	7.46154	14.2308	17.3846	9.76923	25.6923	32	36.9231	33.7692	18.0769	9.76923	10	6.84615	14.3077	6.30769	9.23077	13.7692	9.46154	27.6154	35.3077	40.4615	31.0769	22.1538	7.69231	411.321	35.4615	12.8462	12.8462	6	5.76923	41.1538	30.3077	20.3846	10.8462	13.4615	29.3846	13.3846	7.61538	5.69231	4.69231	37.0769	27.5385	14.3846	8.69231	13.7692
442.582	7.07692	8.61538	10.5385	7.23077	15.7692	15.5385	10.8462	26	33.5385	40.2308	33.5385	19.9231	7.84615	6.76923	6	13.8462	5.84615	10	11.6154	10.3846	27.3077	34.3077	40.5385	30.0769	17.9231	7.30769	441.321	39.3077	12.2308	10.3846	6.84615	5.61538	37.6154	30.4615	19.7692	12	15.1538	35.6154	12.4615	8.69231	5.69231	4.76923	36.4615	23.0769	17.6154	9.69231	14.3846
472.582	8.61538	8.07692	10.6923	7.53846	12.7692	16.1538	11.5385	25.9231	31.2308	38	32.4615	20.8462	9.38462	8.07692	7.61538	13.1538	5.84615	9.53846	13.8462	9.30769	29.1538	33.5385	36.9231	29.4615	21.6923	7	471.322	35.5385	11.3077	10.7692	7.15385	6.23077	41.2308	28.3077	17.9231	11.3846	14.4615	33.3846	12.2308	9.30769	6.76923	4.53846	37	22.6154	15.5385	8.76923	16.6154
502.582	8.46154	9	12.3077	7.76923	13.0769	17.6154	9.53846	25.6154	34.8462	48.0769	30.7692	19.7692	9.69231	8.30769	6.76923	12.0769	5.46154	8.61538	10.7692	9.30769	27.8462	35.8462	37.0769	29.3077	18.6154	6.46154	501.322	36.3077	11.6923	9.69231	7.38462	5.23077	40.6154	30.8462	19.7692	10	15.6154	30.2308	13.0769	7.92308	5.15385	4.69231	33	22.3846	14.8462	8.69231	15.3846
532.592	9.30769	10.3077	14.1538	6.61538	12.5385	18.6154	12.6154	25.6154	32.9231	39.3077	31.9231	23	8.92308	7.46154	6.07692	15.4615	5.84615	8.30769	12.5385	10.6923	27.5385	33.5385	33.9231	28.0769	19.3846	6.84615	531.332	35.0769	12.7692	10.3077	7.07692	5.38462	39.3846	34.6923	18.3846	9.84615	15.0769	29.3077	11.7692	7.23077	5.76923	3.76923	37.3846	21.2308	12.8462	8.30769	14.3846
562.593	9.46154	8.46154	11.0769	8.69231	12.3077	15.3077	9	25.5385	39	41.0769	29.6154	19.8462	9.92308	7.84615	6.23077	16.4615	5.23077	8.38462	10.1538	9.46154	27.8462	37	35.3077	28.6923	17.6154	6.23077	561.332	36.7692	11.3077	10.3077	7.92308	5.07692	41.1538	32.6154	17.1538	9.76923	14.6154	30.3077	12.6923	8.46154	6.61538	4.53846	33.7692	22.1538	14.3077	7.46154	13.0769
592.593	7.84615	10.2308	12.4615	7.38462	13	16.5385	11	29.5385	37.2308	39.8462	32.3077	21.3077	8.84615	6.69231	5.23077	14.4615	5.61538	8.61538	10.5385	9.30769	31.8462	36.6923	39	29.4615	17.1538	6.76923	591.332	32.3077	10.3846	10.0769	7.61538	5.07692	37.9231	34.5385	18.6154	11.3846	13.3846	30.1538	11.6923	8.69231	6.23077	4.76923	36.9231	25.1538	13.4615	8.30769	13.3077
622.593	9.76923	10.3077	14.2308	7.76923	12	15	10.6154	29.6154	38.1538	38.3846	28.0769	20.8462	9.92308	8.53846	4.38462	13.0769	5.53846	10.9231	12.6154	10.4615	24.0769	36.8462	34.0769	30.2308	20	6.15385	621.332	33.5385	12.1538	10.3077	6.30769	5	41.6154	31	20.5385	11.1538	13.0769	26.4615	12.7692	8.46154	6.38462	4.30769	38.4615	25.7692	13.4615	7.61538	13.3846
652.593	9.23077	12.2308	14.8462	8.38462	13.6154	15.5385	12.3846	26.6923	37.6154	43.6154	27.4615	22.3077	8.69231	6.76923	6	12.7692	6.07692	9.84615	12.0769	10.6923	27.5385	32.1538	36.7692	30.6923	17.6154	7.07692	651.332	34.1538	11.6154	10.8462	6.61538	5.84615	41	31	16.6923	11.6154	14.6154	30	9.30769	7.84615	6.23077	4.15385	33.0769	24.7692	13.5385	7.53846	12.7692
682.593	9.53846	13.2308	12.7692	7.76923	12.4615	15.7692	11	24.1538	39.5385	41.4615	28.3077	22	8.84615	6.38462	5.92308	14.6154	6.23077	11.2308	10.7692	9	26.3077	30.9231	35.6923	31.4615	18.5385	7.61538	681.332	31.8462	10.8462	9.61538	7.76923	5	44.2308	31.6923	17.1538	10.9231	16.0769	27.5385	9.61538	7.76923	5.38462	3.76923	31.3077	24.3077	11.3846	7.76923	14.0769
712.593	9	10.6154	14.6154	8	15.2308	16.9231	11.4615	26.6154	37.9231	37.5385	29.4615	21.5385	11.3846	6.84615	5.23077	12.3077	4.46154	10.1538	11.7692	8.07692	23.6154	30.6154	36.2308	29.2308	17.9231	5.76923	711.333	36	12.6154	9.76923	6.61538	5.69231	36.3077	27	18	10.7692	15.1538	25.5385	10.3846	7.69231	6.15385	4.92308	31.7692	25.9231	12.6154	6.84615	15.1538
742.593	9.84615	11.3846	12.8462	8.30769	14.9231	14.8462	9.61538	29	43.7692	36.3077	27	22	9.84615	6.46154	5.53846	14.6923	6.30769	9.38462	10.8462	8.92308	24.3846	32.3846	34.2308	26.0769	18.9231	5.69231	741.333	33.8462	12.6154	9.38462	7.15385	5.92308	39.2308	30.0769	18.6923	12.2308	14.6923	25.7692	11.3077	7.30769	5.30769	4.61538	35.6923	25.3077	13.0769	8.30769	14
772.593	9	11.6154	14.3077	10.0769	15.0769	17.8462	11.2308	26.3846	40	38.6923	29.0769	20.5385	11.6923	7.15385	5.69231	12.5385	6.46154	9.84615	14.3077	9.61538	25.0769	30.6154	35	30.9231	16.9231	4.84615	771.343	33.4615	10.7692	9.84615	7.92308	5.46154	39.7692	29.2308	16.9231	12.6923	16.4615	27.1538	10.1538	7.23077	5.15385	4.53846	34.6154	24.2308	13.5385	6.69231	14
802.604	8.46154	12.0769	14.8462	7.84615	12.6154	16.3077	12.2308	24.1538	37.2308	37	26	20.8462	10.7692	6.46154	6.69231	14.7692	6	8.15385	11.3077	9.92308	23.6154	33.7692	31.0769	27.0769	18.4615	7.61538	801.343	32.3077	12.3077	9.15385	6.84615	5.53846	42.6923	28.6923	18.7692	10.9231	17.3846	26.7692	10.3846	6.76923	5.07692	4.69231	33.7692	25.5385	12.9231	7.30769	15.9231
832.604	10	9.76923	15.3846	9.07692	14	15.7692	12	25.6154	34.7692	40.7692	28.0769	21.6154	12.9231	5.69231	5.53846	13.6923	6.76923	10.3846	11.8462	8.84615	24.0769	30.4615	29.6154	27.5385	18.7692	6.30769	831.343	32.4615	11.3077	10.8462	6.76923	5.53846	39.9231	31.3846	17.3077	10.4615	14.3846	26.6154	9.76923	7.23077	6.23077	4.92308	35.4615	24.6923	14.4615	7.07692	12.3846
862.604	7.69231	12.6154	12.9231	8.38462	16.6923	16	10.6154	23.8462	38.4615	42.3077	24.6923	22.5385	10.7692	6.53846	5.30769	12.3077	5	12	12.4615	8.30769	29.2308	29.3846	32.3846	27.0769	15.9231	6.61538	861.343	31.5385	10.2308	10.7692	7	6.15385	42.6154	29.5385	16.1538	11	17.7692	24.8462	9.53846	7.53846	5.53846	4	34	24.0769	13.3077	6.38462	14.5385
892.604	8.30769	12.5385	12.2308	7.76923	16.2308	16	11.3077	24.4615	32.6923	38	25.4615	20.4615	14.1538	6.07692	4.53846	13.4615	4.46154	9.53846	12.3846	8.07692	24.9231	30.7692	35.6154	22.9231	17.3077	5.76923	891.343	30.9231	12	10	7.15385	5.61538	35	33.1538	17.3077	11.3077	17.3846	24.7692	11.1538	6.84615	4.69231	5.38462	31.7692	23.6154	13	6.53846	13
[truncated: 15 more columns]

## Sheet: QQ
REORGANIZED DATA FROM 3 FIELDS	CELL FRAP	CONTROL	CELL FRAP	CONTROL	CELL FRAP	CONTROL	CELL FRAP	CONTROL	CELL FRAP	CONTROL	CELL FRAP	CONTROL	CELL FRAP	CONTROL	CELL FRAP	CONTROL	CELL FRAP	CONTROL	CELL FRAP	CONTROL	CELL FRAP	CONTROL	CELL FRAP	CONTROL	CELL FRAP	CONTROL	CELL FRAP	CONTROL	CELL FRAP	CONTROL	CELL FRAP	CONTROL	CELL FRAP	CONTROL	CELL FRAP	CONTROL	CELL FRAP	CONTROL	CELL FRAP	CONTROL	CELL FRAP	CONTROL	CELL FRAP	CONTROL	CELL FRAP	CONTROL	CELL FRAP	CONTROL	CELL FRAP
Axis [s] - TIME	ROI1 []	ROI12 []	ROI2 []	ROI13 []	ROI3 []	ROI14 []	ROI4 []	ROI15 []	ROI5 []	ROI16 []	ROI6 []	ROI17 []	ROI7 []	ROI18 []	ROI8 []	ROI19 []	ROI9 []	ROI20 []	ROI10 []	ROI21 []	ROI11 []	ROI22 []	ROI1 []	ROI7 []	ROI2 []	ROI8 []	ROI3 []	ROI9 []	ROI4 []	ROI10 []	ROI5 []	ROI11 []	ROI6 []	ROI12 []	ROI1 []	ROI9 []	ROI2 []	ROI10 []	ROI3 []	ROI11 []	ROI4 []	ROI12 []	ROI5 []	ROI13 []	ROI6 []	ROI14 []	ROI7 []	ROI15 []	ROI8 []
0	126.625	116.125	140.5	145	136.75	144.625	114.75	125.75	146.25	157.625	104.625	121.625	99.75	103.25	131.75	155.125	173.625	163.75	122	97	128.375	98.375	105.5	114.75	81.375	98.125	118	153	43.875	44.75	180.375	168.625	74.125	70.875	214.75	191.25	264.375	251.75	132	121	118.125	110.625	284.625	254.75	115.25	97.625	403	411.25	60.25
5.16	109	124.25	163.5	156.75	138.75	123.875	119.375	108.75	134.625	114.5	134.125	119.875	112.25	105.375	132.75	119.5	161.5	168.875	115	129.25	136.75	113.5	119.375	106.875	91.875	72.375	144.375	104.75	44.5	40.875	185.5	200	78	74.625	166.875	182.875	263.75	267.25	101.875	105.625	115.875	122.5	221.375	252.25	94.25	114	397.75	379.875	67.875
13.53	77.125	100.875	95.625	143.75	87.25	108.375	79	129.75	101	135.125	79.375	130.75	104.5	99.5	82.375	129.5	91.625	164.375	70.75	95.75	109.625	98	66.75	84.5	94.875	79.375	55.375	116.5	34.875	31.375	119.875	171.25	59.375	54.375	117.625	207.125	161.375	238.5	113.25	77.125	143.125	119.625	238.625	219	74.875	69.375	271.5	395.625	37.875
18.76	98.75	126.125	90.5	184.875	109.625	93.125	107.5	97.5	109.5	136.125	96.375	121.875	94.75	120	104.875	107.5	103.125	125.875	75.625	93.25	110.375	102.5	83.375	86	92.625	67.125	74.625	145.375	33.875	41.5	133.875	191.75	56.625	67.125	171.625	240.5	187.75	204.375	87	67.75	120.375	90	154.375	218	73.875	72.625	296.5	409.125	43
48.77	105.75	111.5	116.125	159.625	109.625	98.75	96.875	115.625	138.5	141.875	149.75	89.375	103	102.75	97.75	127.125	119.5	130	100.375	90	112.375	116	79.375	93.25	94.875	85.375	120.625	133.625	42.125	30	175.625	133.375	70.375	67.375	191.25	212.375	266	246.125	139.75	68	125.25	108.25	227.875	185.875	86.5	81.375	332.75	420.875	52
78.771	88.375	90.125	112.25	162.5	134.375	93.125	64.75	110.625	161.125	130.5	111.125	73.375	134.5	98.25	120	146.625	113	132.125	85.75	86.75	118.25	108.25	80.25	84.125	88.125	69.25	118.375	141.25	49.5	38.625	162.875	174	65.25	75.5	175.625	205.375	222.75	265.375	103.375	95.875	149.375	133.25	234.75	172.625	107	86.125	371.375	366.125	66.375
108.771	106.625	99.75	149.375	133.25	124.125	94.5	72.625	112.875	145.5	180.75	129.75	79.5	120.375	112.75	118.625	120.625	99.125	120.125	77.125	81.125	147.375	117.375	95.25	77.125	95.875	74.5	118	118.875	42.875	35	232.625	182.125	84.75	63	231.75	236.875	265.75	222.375	87.125	83.25	117	119.875	259.625	187.25	72.375	88.375	374	348	53
138.771	100	120.5	112.25	145.25	155	113.875	80.375	129	127.75	106.125	130.375	94.875	103.375	132.375	112	127.75	108	128.625	111	76.25	151.5	131.875	92.75	80.625	93.375	69.875	162.5	120	48.375	34	204.75	161	62.75	63.125	160.5	139.375	217	166.375	97.375	67.125	180.125	150	270.875	168.375	131.5	99.625	413.375	372.375	48.875
168.771	102.125	95	104.25	153.5	122.625	104.25	96.125	120	151.25	133.125	110.125	112	137.5	124.25	104.75	115	81	131.625	112.875	74.125	135.125	94.25	94.875	58.875	108.25	87	111.125	108.5	42.875	32.125	114	162	66.625	66.625	225.5	183.75	320	201.75	77.5	67.25	107.125	130.25	248.75	192.75	82.875	83	439.5	321.875	82.5
198.771	106.25	81.25	133	154.125	83.75	120.5	143.75	104.5	113	124	108.25	86.625	158.25	143.5	112.25	121.5	135.75	111.25	94.375	76.875	104.5	118.75	85.875	65.5	115.375	64.75	130.125	98.75	41.75	31.5	108.25	191.875	71.75	56.125	202.875	196	278.75	229.5	94.5	71.125	143.25	122	294.625	212	96.5	91.625	397.375	263.75	72.25
228.771	79.875	94.125	118.125	114.375	121.125	107.625	73.375	120.5	136.25	132.25	108.125	85.375	154	129	127.875	137.625	108.875	95.625	126.375	74.625	114.375	101.375	87.25	65.375	120.75	65	115.75	87.25	44.5	22.75	130.75	164.5	59.125	68.25	180.75	188.375	292.625	215	93.75	80.375	152.25	108.5	177.625	246.875	135.625	98.75	359.125	334.875	87.125
258.781	92.5	105.5	99.5	135.375	145.375	93.875	89.75	122.5	125.375	79.5	107.375	75.375	155.25	160	130	109.875	92.375	143.625	87.875	68.375	101.375	121.625	91.625	57	116.125	81	110.375	126.5	43.375	27.125	181.875	158.625	93.125	49	183.375	234.25	362.875	200.125	122.625	104.875	141.875	95.75	240.375	225.5	144.75	78.25	323.75	302.25	77.75
288.781	97.125	98.625	124.625	151.125	89.75	97	77.5	95.375	113.625	124.875	133.125	123.125	151	134.125	126.375	167.875	123.625	126.375	102.75	102.625	127.375	108.5	108.5	80.25	127	72.125	122.75	112.75	42	37.125	158.875	158.25	79.25	52.375	196.875	263.25	329.5	154.75	82.375	78.375	178.75	114.25	288.125	199	147.5	95.375	322	335.875	66.5
318.782	102.375	94.5	124.125	144	115.625	118.5	73.125	95.25	82.375	124	123.75	85.5	130.5	107.25	123.625	84.5	92.375	150.25	102.375	85.375	119.75	105	68.75	86.5	85.875	48.375	125.25	122.625	47.5	34.875	152.375	134.875	85.875	55.5	210.375	220.875	309.625	190.125	77.625	87.875	197.875	127	272.25	207	192.375	76.625	322.125	278.75	75.75
348.782	105.875	77.875	140.875	116.75	150.125	77.25	87.875	93.75	108.625	122.5	130.25	86.75	146.875	110.25	108.375	118.25	139.5	115.75	114.375	75.625	108.875	113.75	97.75	68.375	91.125	47.375	137	133.625	57.125	35.875	186.375	120.125	108.375	60	241	184.75	333.5	198.5	79.25	101.125	226.75	101	433.125	176.375	144.5	106.75	413.125	311.75	58.375
378.782	105.5	103.25	159	125.375	141	78.375	87.875	97.625	125.875	125.625	125.25	70.75	180.875	124.875	115	113.375	145.125	132	125.5	70.5	107.125	119.125	88.5	79.875	101	70.25	126.875	114.625	51.875	31	147.5	144.75	99.875	73.75	247.25	243.125	335	260.75	116.125	77.875	244.5	165.5	448.875	195	203.75	102.375	334.625	228.75	118.375
408.782	103.75	83.5	123.375	164.125	155	63.875	88.125	95.25	121.125	116.125	121.625	78.5	143.75	147.625	113.25	81.25	149.5	107.375	110.875	83.875	113.625	118.25	100.125	68.125	98.375	71.5	162.875	106	57	43.625	143.875	169	95.875	65.75	233.375	209.5	259.375	210.875	104.75	84.125	193.875	99.125	391.625	190.75	145.5	69.25	404.125	338	112.375
438.782	137.25	78.5	126.75	127.75	108.5	98.25	94.125	103	99.25	145.375	118.375	80.375	130.25	133.75	111.875	129.375	145.875	109.875	103	91.875	90.75	131.625	72.25	70.75	103.75	73.375	149.375	90.625	56.875	45.875	114.375	141	109.875	50.875	224	177.625	319.125	213.875	96.5	80.625	241.75	95.375	382.25	202.75	151.25	80.25	374.75	341	99.75
468.782	76.875	97.625	159	134.125	157.625	86.625	65.125	115.5	102.5	120	96.875	123.625	160.75	122.75	136	128.125	104.75	114.75	97.25	86.75	86.25	107.625	70.875	62.75	82.375	65.5	168.75	140.5	65.625	52.5	143.75	135.75	102.75	65.75	241.875	181.125	279.25	198	113.375	89.25	232.875	89.125	328.25	187.875	232	85.5	417.5	264.25	110.5
498.782	119.5	83.875	136.25	119.5	106.625	79.75	89.5	77.625	106	159.375	115.125	107.25	146.375	113.75	118.75	118.25	169.875	146.875	107.75	99.75	122.75	79.25	94.5	71.625	84.75	64.875	165.75	128.375	67.75	44.375	173.125	151	87.875	52.875	314.25	209.5	272.375	173	82.875	76	293.5	85.75	307.5	135.375	262.25	79.75	349.625	315.25	95.375
528.792	88.625	107.625	144.625	134.25	136.75	111.5	74.125	80.5	119.125	125.625	114.375	100.375	161.625	124.375	142.5	107.875	147.75	120.75	79.75	80.375	89.125	107.5	94.375	72.375	119	57.5	181.75	101.875	60.125	57.125	118.375	159	70.375	54.625	240.75	172.25	298.625	206.875	128.125	55.875	308.375	104.5	326.375	178.5	225.125	74.25	344.875	265.75	113.875
558.793	105.125	82.25	137.25	132.125	144.375	92.75	94.25	90.25	104.625	132.875	114.125	118.25	134.375	136.625	104.75	162.75	142.75	127.625	68.5	84.25	97.5	96.625	85.25	50.625	107.125	45.5	144.125	119.75	51.875	62.75	128.625	156.75	79.625	63.625	231.875	256.875	317	190.75	200.25	78.75	272	81.375	315.5	205.25	191.625	69.375	313.625	290.75	85.125
588.793	98.125	93.25	91.125	125.5	112.375	126.625	97.5	104.125	137.875	96.125	123.625	99.75	179	147.875	104.625	112.125	122.5	124.25	106	92.25	117.875	90	73.125	68.5	99.375	65.25	174	93.25	51.75	63.875	130.75	162.125	103.375	71.125	218.375	226.25	370.375	180	135.25	104.625	307	91.625	338.625	220	295.25	79.625	339.875	285.625	102
618.793	97.375	78.375	111.625	118.75	113.125	92.625	88.25	96.625	95	126	99.5	111.25	133.125	126.5	106.375	120.625	116.375	126.5	107.75	67.875	125.125	109.75	108.25	81.875	113.375	48.625	149	111.625	82.25	61.75	145.375	149	96	52.75	270.375	195.875	317.125	175.25	131	99.125	353	105.625	386.375	275.75	235.5	69.125	416	304.25	118.625
648.793	112.375	91.75	118.875	141.5	112.125	100	95.5	79.625	114.25	113.875	105.5	111.25	138.75	120.625	125.125	149.875	130.875	113.25	99.375	79.125	97.25	91.25	76.75	69.25	100.875	54.5	170.25	106.25	62.5	33.5	181.125	142.625	103.75	69.375	287.625	171.875	322.75	184.5	169.625	107.375	391.875	64.25	426.25	193.625	303.875	74.125	406.125	346	120.75
678.793	98.375	92.125	115.375	164	129.375	120.5	105.75	112.375	96.125	129.25	115.25	99.125	144.125	120.125	143.875	97.375	145.5	127.375	97.625	80.625	103.75	139	94.375	83.5	98.75	56.375	175.125	92	72.375	60.75	190.375	126.875	115	74.875	292.5	272.625	342.125	175.625	120.125	63.5	308.5	99.5	384	142	299.75	79.875	387.125	317.375	153.125
708.793	114.625	109.75	115.125	111.375	144.125	112.375	116.125	92.875	136	126	112.125	107.5	123.25	112.625	144.625	146.75	109.75	101.75	132.75	96.875	102.625	99.5	88.75	72.5	106.875	79.25	154.5	78.25	58.75	39.375	194	143.125	128.5	90.75	263.5	207.125	409.25	150.625	191.375	64.375	342	89.375	419.75	189.375	319.75	62.875	407.5	300	126.75
738.793	107.625	76.125	92.5	163.125	152.25	98.75	90.25	100.625	100.875	137.375	133.375	88	167.5	128.875	152.25	198.625	141.25	105.25	88.75	67.25	119.5	83.625	104.25	87.375	97.875	60.375	170	101.75	62.5	31	232.125	160.875	191.125	63.375	226	243.75	336.375	174.125	173.125	77.125	285.875	95.625	378.75	183.25	244.25	53.375	422.125	386.375	144.25
768.803	119.375	96.5	115.625	138.625	148.375	117.25	94.625	93.75	116.875	149.5	120.25	123.25	144.625	142.875	127.875	117.25	132	134.25	79.375	86.25	170.875	101.75	109.25	71.125	116.625	66	161.125	111.5	74.875	33.375	197.25	141	166.25	65	233.5	173.5	380.875	162.625	164.5	72.5	306.625	100.375	472.125	217.375	283	85.875	382.125	347	106.375
798.803	122.5	94.125	104.375	136.5	142.75	96.75	93.75	115.875	98.75	136.625	126.25	94.75	145.75	120.625	120.625	102.5	139.125	88.625	132.375	73	142.375	82.25	91.25	97	69.5	45.875	203.875	91.25	88.375	36	165.125	112	157.75	69.375	175.5	201.625	395.5	148.5	127.125	80.5	311.625	78.25	447.25	219	327.625	71.75	418	268.75	155.25
828.804	109.625	85.25	121.875	112.5	153.25	123.125	101	104.875	109.25	114.75	106.125	116.125	151.375	134.5	139.5	84	155.375	117.5	104.5	86.5	120.25	89.25	77.375	73.625	107.25	71.625	152.625	88	58.5	30.5	151.875	119.25	196.5	64.375	174.125	157.25	352.875	176	142.375	81.25	304.5	83.125	403.875	173.625	409.5	68.75	394.625	232.375	105.625
858.804	132.25	95.625	117	175.875	120.5	124.625	97.625	94.75	86.875	118.75	94.875	98.5	168.375	112.75	144.875	144.125	123.875	96.375	118.125	63.5	113.125	104.75	79.5	79.125	92.75	75.25	188.625	128.125	64.875	23.625	182.25	116.125	204.625	102.5	131.125	214.875	361.375	208	147.375	84.625	333	87.125	369.25	175.5	339	82.125	381.25	326	118.375
888.804	140.75	80.5	124.5	135	149.75	98.25	91.25	81.125	112.875	125	100.25	119.25	180.25	115.5	164.75	121.875	119.625	115.375	118.75	83.375	143.375	107.375	84.375	81.5	79.25	47.25	153.75	104	67.25	38	124.375	133.375	199.5	75.5	207.5	192.375	332.125	155.75	207.125	73.375	364.25	64.5	470.625	190	328.25	64.875	444.375	331.75	116
	0 = mean of signal before frap
Ploted data	Calculation of total # cells in all fields
	1	2	3	4	5	6	7	8	9	10	11	12	13	14	15	16	17	18	19	20	21	22	23	24	25	26	27	28	29	30	31	32	33	34	35	36
0	98.0239	100.746	102.607	99.8401	103.215	98.8613	101.618	96.3132	100.752	104.751	125.133	101.466	101.613	101.794	103.212	99.254	104.553	102.005	101.758	103.199	100.375	99.8028	98.9959	101.217	102.912	#DIV/0!	#DIV/0!	#DIV/0!	#DIV/0!	#DIV/0!	#DIV/0!	#DIV/0!	#DIV/0!	#DIV/0!
13.53	76.456	66.5217	80.5075	60.8863	74.7456	60.7075	105.025	63.61	55.7414	73.8903	111.862	78.9941	119.528	47.5322	111.155	70	109.195	56.7894	67.6625	146.84	119.645	108.961	107.928	68.6256	50.5843	#DIV/0!	#DIV/0!	#DIV/0!	#DIV/0!	#DIV/0!	#DIV/0!	#DIV/0!	#DIV/0!	#DIV/0!
18.76	78.2953	48.952	117.718	110.256	80.4408	79.0769	78.9583	97.5581	81.9265	81.0992	107.683	96.9477	137.989	51.3328	81.6265	69.8175	84.3575	71.3617	91.8654	128.413	133.75	70.8142	101.721	72.4717	93.733
48.77	94.843	72.7486	111.013	83.7838	97.6211	167.552	100.243	76.8928	91.9231	111.528	96.875	85.1206	111.127	90.2713	140.417	131.678	104.453	90.053	108.075	205.515	115.704	122.596	106.298	79.0615	72.6003
78.771	98.0583	69.0769	144.295	58.5311	123.467	151.448	136.896	81.8414	85.5251	98.8473	109.238	95.3938	127.256	83.8053	128.155	93.6063	86.4238	85.5143	83.9378	107.823	112.101	135.988	124.238	101.434	95.1613
108.771	106.892	112.101	131.349	64.3411	80.4979	163.208	106.763	98.342	82.5182	95.0693	125.559	123.501	128.691	99.2639	122.5	127.728	134.524	97.8364	119.505	104.655	97.6017	138.652	81.8953	107.471	69.168
138.771	82.9876	77.2806	136.114	62.3062	120.377	137.418	78.0925	87.6712	83.965	145.574	114.882	115.039	133.631	135.417	142.279	127.174	99.4059	115.157	130.428	145.065	120.083	160.876	131.995	111.01	74.053
168.771	107.5	67.9153	117.626	80.1042	113.615	98.3259	110.664	91.087	61.5385	152.277	143.369	161.146	124.425	102.419	133.463	70.3704	100	122.721	158.612	115.242	82.2457	129.053	99.8494	136.544	114.783
198.771	130.769	86.2936	69.5021	137.56	91.129	124.964	110.279	92.3868	122.022	122.764	88	131.107	178.185	131.772	132.54	56.4169	127.84	103.508	121.46	132.865	117.418	138.974	105.321	150.664	138.278
228.771	84.8606	103.279	112.544	60.8921	103.025	126.647	119.38	92.9155	113.856	169.347	112.824	133.461	185.769	132.665	195.604	79.4833	86.63	95.9522	136.105	116.641	140.323	71.9494	137.342	107.242	202.616
258.781	87.6777	73.4995	154.86	73.2653	157.704	142.454	97.0312	118.316	64.3168	128.519	83.3505	160.746	143.364	87.253	159.908	114.657	190.051	78.2818	181.324	116.925	148.172	106.596	184.984	107.113	105.068
288.781	98.4791	82.4648	92.5258	81.2582	90.991	108.122	112.582	75.2792	97.8239	100.122	117.396	135.202	176.083	108.869	113.131	100.395	151.313	74.7863	212.924	105.104	156.455	144.786	154.653	95.869	115.401
318.782	108.333	86.1979	97.5738	76.7717	66.4315	144.737	121.678	146.302	61.4809	119.912	114.048	79.4798	177.519	102.141	136.201	112.975	154.73	95.2462	162.853	88.3357	155.807	131.522	251.06	115.561	139.31
348.782	135.955	120.664	194.337	93.7333	88.6735	150.144	133.22	91.649	120.518	151.24	95.7143	142.962	192.348	102.526	159.233	155.151	180.625	130.447	168.01	78.3684	224.505	245.571	135.363	132.518	67.9767
378.782	102.179	126.82	179.904	90.0128	100.199	177.032	144.845	101.433	109.943	178.014	89.9265	110.798	143.772	110.687	167.339	101.9	135.424	101.697	128.476	149.117	147.734	230.192	199.023	146.284	147.969
408.782	124.251	75.1714	242.661	92.5197	104.306	154.936	97.3751	139.385	139.232	132.191	96.0888	146.972	137.587	153.656	130.659	85.1331	145.817	111.396	122.999	124.517	195.586	205.308	210.108	119.564	195.861
438.782	174.841	99.2172	110.433	91.3835	68.2717	147.278	97.3832	86.4734	132.765	112.109	68.9459	102.12	141.397	164.828	123.978	81.117	215.971	126.108	149.211	119.69	253.473	188.533	188.474	109.897	187.765
468.782	78.7452	118.546	181.962	56.3853	85.4167	78.362	130.957	106.146	91.2854	112.104	80.1394	112.948	125.763	120.107	125	105.893	156.274	133.54	141.035	127.031	261.29	174.717	271.345	157.994	193.013
498.782	142.474	114.017	133.699	115.298	66.5098	107.343	128.681	100.423	115.66	108.02	154.89	131.937	130.636	129.114	152.676	114.652	166.194	150	157.442	109.046	342.274	227.147	328.84	110.904	186.553
528.792	82.3461	107.728	122.646	92.0807	94.8259	113.948	129.95	132.097	122.36	99.2224	82.907	130.397	206.957	178.405	105.252	74.4497	128.833	139.768	144.35	229.306	295.096	182.843	303.199	129.774	268.732
558.793	127.812	103.879	155.66	104.432	78.7394	96.5116	98.3532	64.3625	111.851	81.3056	100.906	168.395	235.44	120.355	82.6693	82.0574	125.147	90.2676	166.186	254.286	334.255	153.715	276.216	107.868	202.679
588.793	105.228	72.6096	88.7463	93.6375	143.433	123.935	121.048	93.311	98.5915	114.905	130.972	106.752	152.299	186.595	81.0176	80.6476	145.343	96.5193	205.764	129.271	335.061	153.92	370.801	118.993	193.824
618.793	124.242	94	122.132	91.3325	75.3968	89.4382	105.237	88.1865	91.996	158.748	114.009	132.214	233.162	133.483	133.198	97.5671	181.991	138.034	180.956	132.156	334.201	140.118	340.687	136.73	209.031
648.793	122.48	84.0106	112.125	119.937	100.329	94.8315	115.026	83.4862	115.563	125.592	106.575	110.83	185.092	160.235	186.567	126.994	149.55	167.345	174.932	157.974	609.922	220.142	409.949	117.377	267.59
678.793	106.784	70.3506	107.365	94.1046	74.3714	116.267	119.979	147.754	114.23	121.085	74.6403	113.024	175.166	190.353	119.136	150.049	153.589	107.29	194.804	189.173	310.05	270.423	375.274	121.977	255.208
708.793	104.442	103.367	128.254	125.034	107.937	104.302	109.434	98.552	107.862	137.032	103.141	122.414	134.858	197.444	149.206	135.546	141.598	127.218	271.701	297.282	382.657	221.65	508.549	135.833	243.75
738.793	141.379	56.705	154.177	89.6894	73.4304	151.562	129.971	76.652	134.204	131.97	142.9	119.313	162.112	167.076	201.613	144.289	301.578	92.7179	193.18	224.473	298.954	206.685	457.611	109.253	287.781
768.803	123.705	83.4085	126.546	100.933	78.1773	97.5659	101.225	109.062	98.324	92.029	167.936	153.603	176.705	144.507	224.345	139.894	255.769	134.582	234.204	226.897	305.479	217.194	329.549	110.122	272.756
798.803	130.146	76.4652	147.545	80.9061	72.2781	133.245	120.829	117.683	156.982	181.336	173.1	94.0722	151.499	223.425	245.486	147.433	227.387	87.0428	266.33	157.919	398.243	204.224	456.62	155.535	314.43
828.804	128.592	108.333	124.467	96.3051	95.207	91.3886	112.546	166.071	132.234	120.809	134.734	105.093	149.738	173.438	191.803	127.358	305.243	110.731	200.497	175.231	366.316	232.613	595.636	169.822	229.62
858.804	138.301	66.5245	96.6901	103.034	73.1579	96.3198	149.335	100.52	128.534	186.024	107.995	100.474	123.256	147.22	274.603	156.943	199.634	61.0239	173.738	174.151	382.209	210.399	412.785	116.948	247.906
888.804	174.845	92.2222	152.417	112.481	90.3	84.0671	156.061	135.179	103.684	142.429	133.527	103.528	167.725	147.837	176.974	93.2521	264.238	107.862	213.242	282.283	564.729	247.697	505.973	133.949	205.31
Channel,001 - GFP	RAW DATA imported LAS AF software																						Channel,001													Channel,001
Axis [s]	ROI1 []	ROI2 []	ROI3 []	ROI4 []	ROI5 []	ROI6 []	ROI7 []	ROI8 []	ROI9 []	ROI10 []	ROI11 []	ROI12 []	ROI13 []	ROI14 []	ROI15 []	ROI16 []	ROI17 []	ROI18 []	ROI19 []	ROI20 []	ROI21 []	ROI22 []	Axis [s]	ROI1 []	ROI2 []	ROI3 []	ROI4 []	ROI5 []	ROI6 []	ROI7 []	ROI8 []	ROI9 []	ROI10 []	ROI11 []	ROI12 []	Axis [s]	ROI1 []	ROI2 []	ROI3 []	ROI4 []	ROI5 []	ROI6 []	ROI7 []	ROI8 []	ROI9 []	ROI10 []	ROI11 []	ROI12 []	ROI13 []
0	126.625	140.5	136.75	114.75	146.25	104.625	99.75	131.75	173.625	122	128.375	116.125	145	144.625	125.75	157.625	121.625	103.25	155.125	163.75	97	98.375	0	105.5	81.375	118	43.875	180.375	74.125	114.75	98.125	153	44.75	168.625	70.875	0	214.75	264.375	132	118.125	284.625	115.25	403	60.25	191.25	251.75	121	110.625	254.75
5.16	109	163.5	138.75	119.375	134.625	134.125	112.25	132.75	161.5	115	136.75	124.25	156.75	123.875	108.75	114.5	119.875	105.375	119.5	168.875	129.25	113.5	5.16	119.375	91.875	144.375	44.5	185.5	78	106.875	72.375	104.75	40.875	200	74.625	5.16	166.875	263.75	101.875	115.875	221.375	94.25	397.75	67.875	182.875	267.25	105.625	122.5	252.25
13.53	77.125	95.625	87.25	79	101	79.375	104.5	82.375	91.625	70.75	109.625	100.875	143.75	108.375	129.75	135.125	130.75	99.5	129.5	164.375	95.75	98	12.32	66.75	94.875	55.375	34.875	119.875	59.375	84.5	79.375	116.5	31.375	171.25	54.375	13.51	117.625	161.375	113.25	143.125	238.625	74.875	271.5	37.875	207.125	238.5	77.125	119.625	219
18.76	98.75	90.5	109.625	107.5	109.5	96.375	94.75	104.875	103.125	75.625	110.375	126.125	184.875	93.125	97.5	136.125	121.875	120	107.5	125.875	93.25	102.5	17.55	83.375	92.625	74.625	33.875	133.875	56.625	86	67.125	145.375	41.5	191.75	67.125	18.74	171.625	187.75	87	120.375	154.375	73.875	296.5	43	240.5	204.375	67.75	90	218
48.77	105.75	116.125	109.625	96.875	138.5	149.75	103	97.75	119.5	100.375	112.375	111.5	159.625	98.75	115.625	141.875	89.375	102.75	127.125	130	90	116	47.55	79.375	94.875	120.625	42.125	175.625	70.375	93.25	85.375	133.625	30	133.375	67.375	48.74	191.25	266	139.75	125.25	227.875	86.5	332.75	52	212.375	246.125	68	108.25	185.875
78.771	88.375	112.25	134.375	64.75	161.125	111.125	134.5	120	113	85.75	118.25	90.125	162.5	93.125	110.625	130.5	73.375	98.25	146.625	132.125	86.75	108.25	77.56	80.25	88.125	118.375	49.5	162.875	65.25	84.125	69.25	141.25	38.625	174	75.5	78.74	175.625	222.75	103.375	149.375	234.75	107	371.375	66.375	205.375	265.375	95.875	133.25	172.625
108.771	106.625	149.375	124.125	72.625	145.5	129.75	120.375	118.625	99.125	77.125	147.375	99.75	133.25	94.5	112.875	180.75	79.5	112.75	120.625	120.125	81.125	117.375	107.56	95.25	95.875	118	42.875	232.625	84.75	77.125	74.5	118.875	35	182.125	63	108.74	231.75	265.75	87.125	117	259.625	72.375	374	53	236.875	222.375	83.25	119.875	187.25
138.771	100	112.25	155	80.375	127.75	130.375	103.375	112	108	111	151.5	120.5	145.25	113.875	129	106.125	94.875	132.375	127.75	128.625	76.25	131.875	137.56	92.75	93.375	162.5	48.375	204.75	62.75	80.625	69.875	120	34	161	63.125	138.751	160.5	217	97.375	180.125	270.875	131.5	413.375	48.875	139.375	166.375	67.125	150	168.375
168.771	102.125	104.25	122.625	96.125	151.25	110.125	137.5	104.75	81	112.875	135.125	95	153.5	104.25	120	133.125	112	124.25	115	131.625	74.125	94.25	167.561	94.875	108.25	111.125	42.875	114	66.625	58.875	87	108.5	32.125	162	66.625	168.751	225.5	320	77.5	107.125	248.75	82.875	439.5	82.5	183.75	201.75	67.25	130.25	192.75
198.771	106.25	133	83.75	143.75	113	108.25	158.25	112.25	135.75	94.375	104.5	81.25	154.125	120.5	104.5	124	86.625	143.5	121.5	111.25	76.875	118.75	197.561	85.875	115.375	130.125	41.75	108.25	71.75	65.5	64.75	98.75	31.5	191.875	56.125	198.751	202.875	278.75	94.5	143.25	294.625	96.5	397.375	72.25	196	229.5	71.125	122	212
228.771	79.875	118.125	121.125	73.375	136.25	108.125	154	127.875	108.875	126.375	114.375	94.125	114.375	107.625	120.5	132.25	85.375	129	137.625	95.625	74.625	101.375	227.561	87.25	120.75	115.75	44.5	130.75	59.125	65.375	65	87.25	22.75	164.5	68.25	228.751	180.75	292.625	93.75	152.25	177.625	135.625	359.125	87.125	188.375	215	80.375	108.5	246.875
258.781	92.5	99.5	145.375	89.75	125.375	107.375	155.25	130	92.375	87.875	101.375	105.5	135.375	93.875	122.5	79.5	75.375	160	109.875	143.625	68.375	121.625	257.561	91.625	116.125	110.375	43.375	181.875	93.125	57	81	126.5	27.125	158.625	49	258.751	183.375	362.875	122.625	141.875	240.375	144.75	323.75	77.75	234.25	200.125	104.875	95.75	225.5
288.781	97.125	124.625	89.75	77.5	113.625	133.125	151	126.375	123.625	102.75	127.375	98.625	151.125	97	95.375	124.875	123.125	134.125	167.875	126.375	102.625	108.5	287.561	108.5	127	122.75	42	158.875	79.25	80.25	72.125	112.75	37.125	158.25	52.375	288.751	196.875	329.5	82.375	178.75	288.125	147.5	322	66.5	263.25	154.75	78.375	114.25	199
318.782	102.375	124.125	115.625	73.125	82.375	123.75	130.5	123.625	92.375	102.375	119.75	94.5	144	118.5	95.25	124	85.5	107.25	84.5	150.25	85.375	105	317.571	68.75	85.875	125.25	47.5	152.375	85.875	86.5	48.375	122.625	34.875	134.875	55.5	318.751	210.375	309.625	77.625	197.875	272.25	192.375	322.125	75.75	220.875	190.125	87.875	127	207
348.782	105.875	140.875	150.125	87.875	108.625	130.25	146.875	108.375	139.5	114.375	108.875	77.875	116.75	77.25	93.75	122.5	86.75	110.25	118.25	115.75	75.625	113.75	347.571	97.75	91.125	137	57.125	186.375	108.375	68.375	47.375	133.625	35.875	120.125	60	348.761	241	333.5	79.25	226.75	433.125	144.5	413.125	58.375	184.75	198.5	101.125	101	176.375
378.782	105.5	159	141	87.875	125.875	125.25	180.875	115	145.125	125.5	107.125	103.25	125.375	78.375	97.625	125.625	70.75	124.875	113.375	132	70.5	119.125	377.571	88.5	101	126.875	51.875	147.5	99.875	79.875	70.25	114.625	31	144.75	73.75	378.761	247.25	335	116.125	244.5	448.875	203.75	334.625	118.375	243.125	260.75	77.875	165.5	195
408.782	103.75	123.375	155	88.125	121.125	121.625	143.75	113.25	149.5	110.875	113.625	83.5	164.125	63.875	95.25	116.125	78.5	147.625	81.25	107.375	83.875	118.25	407.571	100.125	98.375	162.875	57	143.875	95.875	68.125	71.5	106	43.625	169	65.75	408.762	233.375	259.375	104.75	193.875	391.625	145.5	404.125	112.375	209.5	210.875	84.125	99.125	190.75
438.782	137.25	126.75	108.5	94.125	99.25	118.375	130.25	111.875	145.875	103	90.75	78.5	127.75	98.25	103	145.375	80.375	133.75	129.375	109.875	91.875	131.625	437.572	72.25	103.75	149.375	56.875	114.375	109.875	70.75	73.375	90.625	45.875	141	50.875	438.762	224	319.125	96.5	241.75	382.25	151.25	374.75	99.75	177.625	213.875	80.625	95.375	202.75
468.782	76.875	159	157.625	65.125	102.5	96.875	160.75	136	104.75	97.25	86.25	97.625	134.125	86.625	115.5	120	123.625	122.75	128.125	114.75	86.75	107.625	467.572	70.875	82.375	168.75	65.625	143.75	102.75	62.75	65.5	140.5	52.5	135.75	65.75	468.762	241.875	279.25	113.375	232.875	328.25	232	417.5	110.5	181.125	198	89.25	89.125	187.875
498.782	119.5	136.25	106.625	89.5	106	115.125	146.375	118.75	169.875	107.75	122.75	83.875	119.5	79.75	77.625	159.375	107.25	113.75	118.25	146.875	99.75	79.25	497.572	94.5	84.75	165.75	67.75	173.125	87.875	71.625	64.875	128.375	44.375	151	52.875	498.762	314.25	272.375	82.875	293.5	307.5	262.25	349.625	95.375	209.5	173	76	85.75	135.375
528.792	88.625	144.625	136.75	74.125	119.125	114.375	161.625	142.5	147.75	79.75	89.125	107.625	134.25	111.5	80.5	125.625	100.375	124.375	107.875	120.75	80.375	107.5	527.572	94.375	119	181.75	60.125	118.375	70.375	72.375	57.5	101.875	57.125	159	54.625	528.762	240.75	298.625	128.125	308.375	326.375	225.125	344.875	113.875	172.25	206.875	55.875	104.5	178.5
558.793	105.125	137.25	144.375	94.25	104.625	114.125	134.375	104.75	142.75	68.5	97.5	82.25	132.125	92.75	90.25	132.875	118.25	136.625	162.75	127.625	84.25	96.625	557.582	85.25	107.125	144.125	51.875	128.625	79.625	50.625	45.5	119.75	62.75	156.75	63.625	558.762	231.875	317	200.25	272	315.5	191.625	313.625	85.125	256.875	190.75	78.75	81.375	205.25
588.793	98.125	91.125	112.375	97.5	137.875	123.625	179	104.625	122.5	106	117.875	93.25	125.5	126.625	104.125	96.125	99.75	147.875	112.125	124.25	92.25	90	587.582	73.125	99.375	174	51.75	130.75	103.375	68.5	65.25	93.25	63.875	162.125	71.125	588.762	218.375	370.375	135.25	307	338.625	295.25	339.875	102	226.25	180	104.625	91.625	220
618.793	97.375	111.625	113.125	88.25	95	99.5	133.125	106.375	116.375	107.75	125.125	78.375	118.75	92.625	96.625	126	111.25	126.5	120.625	126.5	67.875	109.75	617.582	108.25	113.375	149	82.25	145.375	96	81.875	48.625	111.625	61.75	149	52.75	618.772	270.375	317.125	131	353	386.375	235.5	416	118.625	195.875	175.25	99.125	105.625	275.75
648.793	112.375	118.875	112.125	95.5	114.25	105.5	138.75	125.125	130.875	99.375	97.25	91.75	141.5	100	79.625	113.875	111.25	120.625	149.875	113.25	79.125	91.25	647.582	76.75	100.875	170.25	62.5	181.125	103.75	69.25	54.5	106.25	33.5	142.625	69.375	648.773	287.625	322.75	169.625	391.875	426.25	303.875	406.125	120.75	171.875	184.5	107.375	64.25	193.625
678.793	98.375	115.375	129.375	105.75	96.125	115.25	144.125	143.875	145.5	97.625	103.75	92.125	164	120.5	112.375	129.25	99.125	120.125	97.375	127.375	80.625	139	677.583	94.375	98.75	175.125	72.375	190.375	115	83.5	56.375	92	60.75	126.875	74.875	678.773	292.5	342.125	120.125	308.5	384	299.75	387.125	153.125	272.625	175.625	63.5	99.5	142
708.793	114.625	115.125	144.125	116.125	136	112.125	123.25	144.625	109.75	132.75	102.625	109.75	111.375	112.375	92.875	126	107.5	112.625	146.75	101.75	96.875	99.5	707.583	88.75	106.875	154.5	58.75	194	128.5	72.5	79.25	78.25	39.375	143.125	90.75	708.773	263.5	409.25	191.375	342	419.75	319.75	407.5	126.75	207.125	150.625	64.375	89.375	189.375
738.793	107.625	92.5	152.25	90.25	100.875	133.375	167.5	152.25	141.25	88.75	119.5	76.125	163.125	98.75	100.625	137.375	88	128.875	198.625	105.25	67.25	83.625	737.583	104.25	97.875	170	62.5	232.125	191.125	87.375	60.375	101.75	31	160.875	63.375	738.773	226	336.375	173.125	285.875	378.75	244.25	422.125	144.25	243.75	174.125	77.125	95.625	183.25
768.803	119.375	115.625	148.375	94.625	116.875	120.25	144.625	127.875	132	79.375	170.875	96.5	138.625	117.25	93.75	149.5	123.25	142.875	117.25	134.25	86.25	101.75	767.583	109.25	116.625	161.125	74.875	197.25	166.25	71.125	66	111.5	33.375	141	65	768.773	233.5	380.875	164.5	306.625	472.125	283	382.125	106.375	173.5	162.625	72.5	100.375	217.375
798.803	122.5	104.375	142.75	93.75	98.75	126.25	145.75	120.625	139.125	132.375	142.375	94.125	136.5	96.75	115.875	136.625	94.75	120.625	102.5	88.625	73	82.25	797.593	91.25	69.5	203.875	88.375	165.125	157.75	97	45.875	91.25	36	112	69.375	798.773	175.5	395.5	127.125	311.625	447.25	327.625	418	155.25	201.625	148.5	80.5	78.25	219
828.804	109.625	121.875	153.25	101	109.25	106.125	151.375	139.5	155.375	104.5	120.25	85.25	112.5	123.125	104.875	114.75	116.125	134.5	84	117.5	86.5	89.25	827.593	77.375	107.25	152.625	58.5	151.875	196.5	73.625	71.625	88	30.5	119.25	64.375	828.773	174.125	352.875	142.375	304.5	403.875	409.5	394.625	105.625	157.25	176	81.25	83.125	173.625
858.804	132.25	117	120.5	97.625	86.875	94.875	168.375	144.875	123.875	118.125	113.125	95.625	175.875	124.625	94.75	118.75	98.5	112.75	144.125	96.375	63.5	104.75	857.593	79.5	92.75	188.625	64.875	182.25	204.625	79.125	75.25	128.125	23.625	116.125	102.5	858.783	131.125	361.375	147.375	333	369.25	339	381.25	118.375	214.875	208	84.625	87.125	175.5
888.804	140.75	124.5	149.75	91.25	112.875	100.25	180.25	164.75	119.625	118.75	143.375	80.5	135	98.25	81.125	125	119.25	115.5	121.875	115.375	83.375	107.375	887.593	84.375	79.25	153.75	67.25	124.375	199.5	81.5	47.25	104	38	133.375	75.5	888.784	207.5	332.125	207.125	364.25	470.625	328.25	444.375	116	192.375	155.75	73.375	64.5	190
[truncated: 15 more columns]

## Sheet: QQ2
REORGANIZED DATA FROM 3 FIELDS	CELL FRAP	CONTROL	CELL FRAP	CONTROL	CELL FRAP	CONTROL	CELL FRAP	CONTROL	CELL FRAP	CONTROL	CELL FRAP	CONTROL	CELL FRAP	CONTROL	CELL FRAP	CONTROL	CELL FRAP	CONTROL	CELL FRAP	CONTROL	CELL FRAP	CONTROL	CELL FRAP	CONTROL	CELL FRAP	CONTROL	CELL FRAP	CONTROL	CELL FRAP	CONTROL	CELL FRAP	CONTROL	CELL FRAP	CONTROL	CELL FRAP	CONTROL	CELL FRAP	CONTROL	CELL FRAP	CONTROL	CELL FRAP	CONTROL	CELL FRAP	CONTROL	CELL FRAP	CONTROL	CELL FRAP	CONTROL	CELL FRAP
Axis [s] - TIME	ROI1 []	ROI10 []	ROI2 []	ROI11 []	ROI3 []	ROI12 []	ROI4 []	ROI13 []	ROI5 []	ROI14 []	ROI6 []	ROI15 []	ROI7 []	ROI16 []	ROI8 []	ROI17 []	ROI9 []	ROI18 []	ROI1 []	ROI8 []	ROI2 []	ROI9 []	ROI3 []	ROI10 []	ROI4 []	ROI11 []	ROI5 []	ROI12 []	ROI6 []	ROI13 []	ROI7 []	ROI14 []	ROI1 []	ROI12 []	ROI2 []	ROI13 []	ROI3 []	ROI14 []	ROI4 []	ROI15 []	ROI5 []	ROI16 []	ROI6 []	ROI17 []	ROI7 []	ROI18 []	ROI8 []	ROI19 []	ROI9 []
0	1383.2	1314.1	2893.1	3398.8	2443.1	2081.7	3036.3	2963.6	4198.6	3735.2	1924.9	2166.7	3544.2	3406.2	1392.4	2340.9	7714.6	6791.8	7295.4	10817.8	10982.1	11820.9	6453.9	6322.4	3718.7	4245.4	14578.6	14340.8	3314.4	3936.8	2751.6	2526.3	5725.6	5675.1	4729	4572.1	1702.8	2818.3	1959.2	2431	11511	13409.5	3016.7	4076.4	1307.1	2175.9	1935.6	2222.7	1046.3
5.16	1512.4	1462.9	3978.8	2628.3	1973.4	2074.6	3143.6	3122.6	3742.3	3908.3	2097.3	1892.8	3229.5	3252.4	1953.5	1476.8	7253.9	7415	7490.5	13327.7	12701.5	11676.5	6434.2	6104.5	3510.1	3751.7	13400.8	14120.3	3351.1	3420.1	2858	2712.7	5802.2	5460.7	3718.8	4560.9	2609.2	2285	2143.5	1470.8	10974.2	11652.8	3698.7	3215.8	1549.5	1200.3	1665.2	1486.5	1559.7
14.16	991.8	1194.5	2339.8	3199.7	2338.7	1727.8	2719.8	2440.2	3189.6	4181.2	1591.4	1502.8	2172.4	3948.5	1084.2	1984.8	3939.2	6592.3	4725	10895.3	6525.9	13350.4	3199.3	5582.6	3169.2	4276.8	7400.7	15712	1966.2	3602.1	2395.4	2659.6	3934.3	6349.1	2860.4	4871.9	1658.8	2878.7	1602.8	1988.6	7011	11219.2	2588.3	3455.8	1041.9	1939.9	1144.9	2020.8	1035.7
19.4	833.3	1245.7	1958.4	3016.1	2328.7	1556.6	3709.1	2803.5	2477	2858.1	1481	2251.7	2594.3	2890	1395.4	1783.3	6434.2	5546.2	6729.6	12479.8	8791.1	11135	3874.7	5632	3202.2	3153.5	8164.1	14922.4	2241.9	3272.2	2975.1	3360.5	5001.2	5538.7	3010.3	4563	1863.8	3064	1501.2	2005	8655.3	12741.6	2205.3	3670.2	1690.1	1669.5	1646.7	1677.4	1242.2
49.4	1334.4	1302.9	1816.5	2827.4	2048.1	2116.8	2190.3	2735.1	3265.8	2927.7	1904.4	3243.9	3029.2	3110	1902.5	1532.1	6156.3	6659.8	5025.9	10623.3	9376	10312.8	3439.5	6027.4	3784.8	3916.5	10644.5	13252.1	2541.8	4151.3	2396.3	2782.2	5540.2	5680	4113.2	3947.8	1715.8	2763.5	1808.3	2707.4	8722.2	11272.8	2525.5	3466.6	1998	2117.2	1728.7	1232	1400.8
79.4	1234.3	1130.7	2149	2898.9	2317.7	1825.2	2680.2	3614.2	3594.2	4148.4	1725.3	1563.8	2549.7	3034.3	1923	1832.1	7663.8	5358	4303.5	9411.9	10248.2	11376.6	5246.4	5641.4	4394.1	3318.2	14926.4	12028.2	2514.3	3163.1	2131.6	3033.8	4937.3	6219.3	3703.2	4363.2	1876.6	2353.5	1749.2	1791.7	11234.7	9601.3	2090.5	3528.1	1325.8	1673.9	1173.7	1729.7	1104.2
109.401	1232.5	1235.7	2168.9	3745.6	2099.2	2553.1	3081.1	3119.3	3080.1	3671.2	2094.7	1574.2	2869.3	3444.6	1579	1546.3	6901.6	6274.6	6381.7	6911.9	11556.3	10552.7	4946.2	5605.2	4437.5	4493.7	11167	12406.6	2296.4	3261.4	1732.8	2406.4	7795.6	6972.4	4279.3	4795.4	2393.6	2937.5	1774.4	1736	10007.9	9419.6	2303.4	3405.8	1562.6	1624.6	2033.8	2344.1	1209
139.411	1549	1467.4	2590.2	2480.4	2399.7	2314	3497	2532.3	2972	3311.3	2153.6	1643.5	2570.5	2991.8	1027.9	1602.1	7006.6	5926.9	7710.9	8901.9	9804.4	11277.4	5878.4	5675.9	4232	3674.3	11513.4	12768.8	1699.3	2458.3	2536.3	2204	7312.4	7019.5	4318.9	3873.8	2194.9	2651.9	1535.7	1100.3	10098.2	11571.2	2867.6	3111.9	2142.6	1797.8	1599.1	1919.9	1113.5
169.411	1245.7	1101.5	3061.1	2519.9	2481.9	2152.7	3168.8	3458	3079.4	3476.3	1776.5	2649.5	2541.3	3261.5	1431.7	2063	6884.8	6292.2	9513.3	9345.7	9861.7	11634.9	6577.1	4416.5	4738.4	3353.9	11627.5	10247.6	2981.4	2957.5	1712.6	3309.4	6693	4813.3	4885.1	4489.4	1781.7	2310	2194.2	1714.7	10263.4	9911.1	2748.5	3022	2275.7	1576.6	1806.2	1529.2	930.7
199.411	1417.8	1389	3163.3	2350.7	1457	1608	3243	2978	2529.1	2386.2	1657.3	2993.4	3850.1	3768.7	1324.1	1557.4	7083	4724.7	9552	9113.1	9715	12350.4	5656.4	6458	3959.8	3852	11122.1	13128.8	3258.3	3508.9	2607.5	2554.2	5320.9	5596.8	5360.6	4179.6	1880.8	2617	2053.9	2009.2	10634.7	11136.3	2449.5	2798.1	2941.7	1645.3	2589.4	1280.2	1638.7
229.411	1412.4	1278.9	4287	2434.7	2519.6	2531.7	3159.5	3637.2	3279.2	3346.9	1668.4	1887.3	2300.1	3216.2	1681.5	1805.5	5661.8	4828.1	9902.8	7816.3	12402.9	11864.4	5637.6	5307.5	5182.7	3072.5	12820	11104.2	2114.5	3730.6	3610.2	2831.8	6273.7	4990	5418.4	4108	2245.4	2786	1255.4	1787.6	11252.8	9823.9	3308.1	3069.9	2807.9	1285.6	2187.3	1954.9	1207
259.411	1543.5	1363.5	3522.9	2321.9	2217.4	1477.7	3534.6	3401.4	3385.8	3206.7	1210.6	1956.8	2745.3	3117.2	1405	1438.7	5718.4	4718.5	9322.4	8400.7	12527.3	10293.8	6086.9	5136	5157.9	3690.4	11964.4	12610.5	2355.4	3443.5	2709	3251.5	5415.9	5263.4	5433.6	4452.1	2191.6	2115.4	1484.7	1772.4	11038	11527.9	4666.5	2712.1	3699.2	1746.5	1883.8	1006.6	1894.4
289.411	1474.4	1122	3168.7	2934.3	1558	2576.5	4213.1	3709.6	3191	2324.7	1645.6	1762.2	3043.4	2750.8	1527.7	1656.6	4632.4	4292.3	8844.2	10108.4	11932.2	11351.4	6986.4	5612.9	4584.8	4286.4	10952.1	11245.3	1914.8	4205.1	2586.7	3646.4	5853.1	5663.9	5984.2	4668.2	2373.1	1802.8	1522.3	1491.8	10827	8867.5	4487.7	2854	5363.9	1540.7	2021.7	2026.1	1680.4
319.411	1259.2	1346	2835.7	2757.9	2575.5	2428.7	3350.5	3313.7	3074.1	2930.7	1879.3	1849.3	2994.5	2924.1	1184.9	2278.9	6061.7	4697	10242.1	9014.3	12915.8	11495.6	5278.1	6055	5440.3	3687.1	14070	11665.9	2331.1	3479.1	4171.5	2827	4602.8	6736.4	6297.3	4865.9	2046.7	1632.8	1807.5	2131.5	10987.5	9400	4905.4	4101.6	3862.1	2239.7	3369.9	1142.5	1579.5
349.411	1246.7	1057.9	3789.3	2715.2	2613.9	2332.5	3319.1	2950	3007.6	2699	2046.3	1817.2	3081.3	3240.6	1314.3	1779.1	5901.3	6267.4	10794.5	7916.8	12643.7	10530.4	8011.1	5712.2	3941.7	3240.4	14234.7	11278.4	3248.3	3088.2	3127.3	2651.8	4347.5	6311.1	5757.7	4282.6	2631.3	1256.6	1619.9	1737.9	10755.3	9019.6	4277.3	4076.7	5524.6	1933.8	2010	1029.5	1770.6
379.412	1384.6	1308.2	3689.3	2635.6	2608.6	2444.2	3391.9	2769.1	3170.2	2880.9	2014.1	1373.6	3089.7	3388.3	1747.2	1625.5	6199.8	5160.5	10051.8	11730.6	11038.5	8656.9	8697.8	7005.2	4969.6	3471.4	12080.6	11622.3	3123.4	3252.8	2933.7	2876.6	5174.2	5001.5	6469.4	3964.7	2989.2	1710.5	1865.3	1869.5	11753.4	8685.3	4109.3	3256.9	5003.9	1294.2	2851.6	1298.7	1396
409.422	1332.5	1869.7	2993.7	2085.4	2190.9	2395.9	4607.1	2713.9	3412.9	3113.9	2336.5	1691.1	3717.4	2882	1917.2	1929.2	5557.1	6047.9	9029.5	9700.7	13299.3	12462.7	10320.1	3942.8	5253.3	3635.2	12003.3	13180.4	3353.6	2316.4	3469.9	2556	6086.1	5157.8	6514.7	3947.7	2612.8	2064.7	1507.7	1554.6	10404.9	8637.8	3686.6	3025.3	4222	2180.6	2987.8	1035.8	1629.5
439.422	1605.3	1419.8	3573.5	2428.5	2095.8	2287.5	3398.1	3328	3032.2	2616.2	2072.4	1339.7	3177.5	2361.7	2021.5	1896.7	5776.2	5192.1	9539.8	11486.1	11619.8	9512.3	14063	4229.5	4865.8	3569.5	12347.3	13818	3975.7	2670.1	2940.2	2571	6339	5125.8	8071.1	3583.5	2357.1	1285.8	1548.1	1389.8	12524.4	11234.2	3966.1	3189.6	4428.3	1398.4	3001	1373	2506
469.422	1743.1	1535.1	3653.8	2275.7	2539.3	2270.7	3037.6	2800.7	3023.3	2514.3	2618.5	1532.9	3072	2355.6	1144.5	1423.9	5373.7	4622.8	9723	10062.5	14734.8	9151	14366	4197.3	4606.9	3561.4	12736.9	12457.4	3815.6	3142.1	3020	2856.7	5718.4	4262.9	7547.4	4102	2632.2	1245.2	1532	1829.1	10852.9	9122.5	4010.3	3727.5	3902.6	1288	2360	1878.4	1531
499.422	1968.9	1283.8	3056.1	2136.3	2225.8	3072.3	2797.9	2678.4	2587.7	2959.8	2051.4	1412.1	3047.7	2501.8	1337.7	1380.5	5874.9	4785.8	9113.3	9325.9	11415	8968.1	10467.1	5251.8	5168.1	3293.2	13406.2	12312.8	2867.4	2875.7	3068.8	3360.4	5316.2	4433.2	8931.5	3542.7	2098.6	1946.7	1938.4	1551.7	11787.4	9086.4	2821.1	2292.8	3556.1	1439.1	2722.1	1431.3	1847
529.422	1616.9	1375.2	3912.9	2585.3	2570.6	2024.6	2960.2	2523.7	2490.9	3460	2093.8	1752.3	3332.2	3352.9	1611.8	1166.4	4644.8	5002.4	10159.4	9639.2	10641.5	10237	11335.4	4154.5	6229.5	2647.5	11298.9	12405.1	3260.3	3016.2	2869.8	2960.8	5674.7	4367.4	8698.7	4289.5	2321.3	1592.3	1763.7	1726.1	11624.2	7595.5	2230.2	3720.5	2724.7	1504.5	2257.8	1546.6	2469.2
559.422	1587.1	1303.2	4004.4	2070.6	2478.1	1591.2	3853.9	2894.8	3404.3	2698.8	1887.3	1358.6	2893.7	1772.8	1335.6	1460.4	5322	5789.4	10611.2	8246.2	11260.9	11126.7	12429.7	4604.1	6477.4	3315.4	11637.9	10835.8	3304.4	2151.2	2904.2	3006.2	6478.2	4846.5	9247.4	3137	2045.1	1749.9	1394.5	2035	11824.2	10287.4	3499.5	3469.3	2908.3	1903.7	3140.6	1265.2	2067.6
589.422	1908.1	1534.4	3718.3	2326.9	2725.7	1649.7	3251.2	2155.5	3092.7	2462.8	1674.2	1707.3	2974.6	2935.3	1322.7	1357.1	5775.6	6588.6	9698.4	8337	11872.3	9246.2	12228.1	4088	7107.4	3199	10974.1	10869.6	3566.3	2665.7	2283.2	3132.8	5605.6	5704.5	7163.9	3680.7	2435.7	1555.6	1733	1539.1	11659.4	9325.3	2747.7	2173.6	3918	1280.7	2415.5	1182.1	1426.7
619.423	1661.8	1283	2932.9	2018	3167.1	1889.3	2824.3	2997.2	2888.7	2772.3	2284.2	1740.1	3008.4	2486.5	1113	1318.7	6419	5047.2	10765.2	9464.2	12870.4	10534.9	16181.1	3904.1	7250.4	3629.7	15151.8	9609.1	3735.6	2961.2	3100	2591.7	5978	4421.8	8304.2	2957.5	1677.3	1486.9	1456.3	2071.6	12887.5	8262.5	2773.4	2953.8	4221	1329.5	3231.5	1465.6	2082.6
649.433	1931.3	1098	2643.8	1714.8	2929.3	2023.8	2576.3	3046.5	3303.9	3298.2	2461.2	1350.4	2666.4	2191.4	1421.4	1822.9	6587.1	5521.9	13139.7	8008	12885.5	10209.5	15561.8	4937.2	7577	3512.4	14947.9	11658.8	4216.8	1780.2	3159.9	3015.7	4800.4	4111.4	9126.8	3364.8	2419.4	1311	1705.6	1688.6	13556.9	8489.1	2678.8	2201.4	4743.3	1670.5	3041	1264.7	2049
679.433	2100.2	1226.4	2568	1971.2	2149.9	2014.9	3351.7	2725.6	3351.1	2523.5	2066.8	1812.3	2546.1	3492.6	1292	1328.1	7276.4	4376	13626.7	8944.6	12447.3	9372.1	13339.7	4344.4	7097.6	2873.5	11186.3	10211.1	5121.8	3136.9	3348.1	2486.5	5350.5	4802.7	8903.6	4072.3	2563.9	2025.9	1908.6	1424.8	12420.9	7497.9	3567.3	2610.2	4837.9	1932.3	3612.8	1680.1	2464.6
709.433	2104	1092.8	3623.1	2095.9	2288.6	1913	3292.8	2913.5	2703.6	2770	1869.9	1486.5	2095.6	2302.8	1204.8	1999.8	6964	6340.6	14709	10181.3	12047.2	9078.6	12440.6	3715.7	7512.5	2858.4	12942.3	11195.6	4670.6	2839	2493.6	3355.1	5421.3	3586.1	6816.1	3345	2044.9	1587.7	1292.5	1809	14591.2	8059.4	3601.8	3218.6	4418.2	1481.8	3741.8	1075.5	2612.6
739.433	1962	1057.4	4510.5	1447.6	2824.9	1935.5	2581.8	2594.9	2325.3	2922.7	1554.8	1948.8	3149.2	2197.9	1423.3	1291.1	6337.1	4161.4	13054.7	8841	11816	9015.6	11217.3	3139.6	7007.6	2565.5	12461.9	10405.8	3795.4	3255	2075.1	2583.8	3869.7	3482.7	7723.3	4153	2471.3	2282.7	1278.4	1388.1	11893.5	8331.5	4128.8	2805.9	3738.8	1392	4186.8	1326.8	2648
769.433	3132	937.2	4359.1	1794.3	2658.4	1907.4	3220.3	2885.4	3055.4	2133.5	1288.7	1758.9	3050	2436	1202.3	1644.9	5123.2	4488.5	10698.7	8385.8	12707.7	8962.8	11707.1	4054.1	5392.4	2452	13115.7	10214.2	5782.6	3343.7	3455.4	2639.4	5634.3	3708.3	8211.7	3716.7	2635.5	1833	1554.7	1448.9	13568	8450.5	3730.2	3378.8	4212.4	1564	4260.9	1255.1	2501.1
799.433	3186.6	1148.2	3241.2	2108.7	3160.9	2669.9	3294.3	2649.3	3286.4	3436.1	2103.1	1199.9	2120.6	1660.4	1422.2	1441.8	7554.5	4799.9	12622.9	7016.4	11804.3	11013.7	14147	4177.6	5988.6	2452.6	10762	8815.7	3857.5	2616	3188.7	2783.9	5386.6	4096.7	7621.2	3090.1	2804.4	2890.5	863.9	1844	13359.2	8412.4	3549.7	2741.1	3951.9	1212	3728	1420.3	2563
829.433	3128.8	1118	5640	2193.3	2841.4	1994.3	2857.5	2714.3	2911.4	3407.2	1713.9	1574.8	1845.3	2075.4	1271.7	2357	6718.7	3918.7	14215.3	9269.7	12684.1	9858.5	12832.9	3287.9	6411.8	3501	11579.1	9670.7	3925.7	2537	3421.4	2162.1	4747.1	3766.8	9125.4	3428.7	2851.1	2371.8	1414.3	1391.7	13231.3	7293.3	4402.6	2767.5	2884.7	1325.5	3611.4	1549.7	3249.6
859.434	3747.3	1140.3	4174.6	2249.1	2326.6	2038.3	3315.1	2762.6	2892.3	2369.2	1516.2	1983.9	2302.5	1482.5	1858.5	1184.2	6676.8	4754.9	13580.9	7718.7	12347.8	11001.4	14608.2	4731.8	7849.4	3209.4	11840.5	10124	5233.4	2086.4	2913.5	3443.6	4577.3	4394.5	8846.3	3076.2	4041.1	2048.1	1208.4	1044.2	12936.8	7735.1	4534.4	2108.1	2984.2	1812.7	4445.9	1011.4	2621.9
889.444	2620.4	1027.2	5372.4	2522.3	2564.8	2227.1	3234	2753.1	2542.3	2843.8	2195.7	1617.2	2220.4	1676.1	1628.9	1383.9	7869.9	5393.4	15560	8269.3	15029.8	9839	15981.7	4650.4	7633.3	3100.6	13766	9349	5002.7	2031.1	3447.9	2783	4748.9	3300.5	7516.8	3452.3	3107.8	2659	1775.8	1733.5	14035.8	7347	5862.9	2037.8	3081.6	1435.7	4309.1	1487.2	2439.7
	0 = mean of signal before frap
Ploted data	Calculation of total # cells in all fields
	1	2	3	4	5	6	7	8	9	10	11	12	13	14	15	16	17	18	19	20	21	22	23	24	25	26	27	28	29	30	31	32	33	34	35	36	37	38	39	40	41	42
0	104.271	114.017	106.26	101.54	103.891	99.0812	101.729	87.6418	105.362	61.2367	100.792	103.711	90.3928	98.3075	90.602	107.074	103.52	92.4975	84.4943	105.149	89.7172	92.0902	84.6099	97.0775	92.1499	93.914	104.222	93.0765	109.876	96.606	103.69	103.272	106.933	96.5535	106.687	108.323	#DIV/0!	#DIV/0!	#DIV/0!	#DIV/0!	#DIV/0!	#DIV/0!
14.16	83.0306	73.1256	135.357	111.458	76.2843	105.896	55.0184	54.6252	59.7546	43.3673	48.8817	57.3084	74.1021	47.1022	54.5848	90.0662	61.9663	58.7122	57.6232	80.5994	62.4911	74.8973	53.709	56.6558	76.0035	69.1695	73.9343	54.8488	68.3497	109.23	50.4101	96.1827	94.2998	83.1881	89.8038	84.165	#DIV/0!	#DIV/0!	#DIV/0!	#DIV/0!	#DIV/0!	#DIV/0!
19.4	66.8941	64.9315	149.602	132.302	86.666	65.7725	89.7682	78.2482	116.011	53.9239	78.9502	68.7979	101.544	54.7104	68.5135	88.5315	90.2956	65.9719	60.829	74.8728	67.9295	60.0866	101.234	98.1698	117.211	82.0897	74.4136	85.2964	106.481	93.0918	97.1693	101.831	113.266	113.517	71.1142	51.5248
49.4	102.418	64.2463	96.7545	80.0812	111.548	58.7071	97.4019	124.176	92.4397	47.3102	90.9161	57.0644	96.6373	80.3231	61.229	86.1297	97.5387	104.19	62.0879	66.791	77.3739	72.8524	94.3699	140.317	91.3466	143.129	55.4118	80.626	233.984	92.9943	61.9346	82.7518	101.805	112.238	175.738	154.16
79.4	109.162	74.1316	126.983	74.1575	86.6406	110.327	84.0293	104.962	143.035	45.724	90.0814	92.9982	132.424	124.095	79.4885	70.2617	79.3867	84.8735	79.7366	97.628	117.012	59.2529	79.2043	67.8557	56.3137	141.907	93.6328	65.1679	147.964	113.662	122.934	105.977	163.516	149.685	116.68	88.8769
109.401	99.741	57.9053	82.2216	98.7754	83.899	133.064	83.2985	102.115	109.993	92.3292	109.51	88.2431	98.7494	90.0085	70.4115	72.008	111.807	89.2376	81.4843	102.212	106.245	67.6317	96.1837	86.7625	107.362	147.389	117.205	96.8351	117.593	108.551	91.1638	114.022	114.214	143.062	145.874	122.712
139.411	105.561	104.427	103.704	138.096	89.7533	131.037	85.9182	64.1595	118.217	86.6208	86.9385	103.568	115.178	90.1682	69.125	115.077	104.173	111.49	82.7671	139.571	87.2701	92.1495	119.179	83.2908	64.2787	106.566	149.976	93.1429	113.583	137.681	83.5088	105.951	72.8149	125.409	157.324	84.6413
169.411	113.091	121.477	115.292	91.6368	88.5827	67.0504	77.9181	69.3989	109.418	101.793	84.7596	148.921	141.28	113.466	100.808	51.7496	139.052	108.814	77.1299	127.964	103.555	90.9497	144.342	118.114	108.171	201.511	197.325	105.661	139.834	100.901	125.887	100.607	170.655	117.694	143.108	103.162
199.411	102.073	134.568	90.6095	108.899	105.989	55.3651	102.16	85.0199	149.914	104.816	78.6614	87.5875	102.799	84.7153	92.8582	102.087	95.0704	128.256	71.8686	102.225	95.4958	87.5415	178.794	202.265	90.7364	102.158	190.267	105.213	107.967	86.771	117.61	173.094	157.857	178.008	125.349	168.147
229.411	110.439	176.079	99.5221	86.8663	97.9772	88.4014	71.5161	93.1321	117.268	126.694	104.539	106.22	168.68	115.452	56.6799	127.488	125.725	131.899	80.5958	70.2282	114.545	107.759	218.412	111.888	72.9393	234.559	138.052	91.5818	116.542	100.14	108.423	187.818	256.469	115.154	181.102	164.038
259.411	113.201	151.725	150.058	103.916	105.585	61.8663	88.0694	97.6576	121.191	110.972	121.698	118.514	139.765	94.8765	68.4013	83.3154	102.897	122.046	103.602	83.7678	95.7503	172.062	211.806	187.145	145.622	182.649	128.193	114.451	98.0928	105.835	176.608	93.4525	349.986	270.773	242.685	209.802
289.411	131.408	107.988	60.4696	113.573	137.265	93.3833	110.637	92.219	107.923	87.4936	105.117	124.47	106.962	97.3927	45.5352	70.9385	103.34	128.191	131.634	102.045	122.098	157.242	348.147	99.7828	162.499	132.068	87.1767	120.687	99.237	103.891	123.306	150.18	305.398	169.093	172.405	201.162
319.411	93.5513	102.821	106.044	101.111	104.893	101.622	102.408	51.9944	129.055	113.621	112.354	87.1693	147.55	120.608	67.003	147.559	68.3273	129.417	125.349	84.7994	116.888	119.597	172.438	294.958	124.194	140.767	114.701	121.537	112.78	137.042	129.418	96.481	290.43	197.225	170.269	169.647
349.411	117.847	139.559	112.064	112.512	111.434	112.607	95.0842	73.8744	94.1587	136.349	120.069	140.245	121.642	126.212	105.184	117.931	68.8866	134.444	209.398	93.2102	119.244	104.921	285.686	195.24	177.735	154.1	102.743	99.2177	138.632	111.103	154.838	99.8472	211.847	171.294	186.295	231.815
379.412	105.84	139.98	106.726	122.491	110.042	146.629	91.1873	107.487	120.14	85.6887	127.511	124.162	143.158	103.943	96.0219	101.985	103.453	163.175	174.756	99.7753	135.325	126.172	386.64	219.573	91.451	142.967	129.691	128.373	133.17	106.793	193.597	109.863	331.092	235.722	124.493	205.245
409.422	71.2681	143.555	91.4437	169.759	109.602	138.165	128.987	99.378	91.8848	93.0809	106.713	261.745	144.512	91.0693	144.776	135.755	117.998	165.025	126.546	96.9831	120.458	121.859	193.616	288.453	196.776	140.108	131.212	146.977	106.445	106.528	173.352	100.555	262.347	226.788	155.007	215.932
439.422	113.065	147.148	91.6197	102.106	115.901	154.691	134.543	106.58	111.25	83.0552	122.156	332.498	136.316	89.3566	148.897	114.36	123.669	225.23	183.318	111.39	111.485	124.345	316.669	218.572	204.305	196.918	121.713	111.854	130.206	115.969	178.241	111.913	265.997	210.969	141.312	297.915
469.422	113.55	160.557	111.829	108.459	120.244	170.82	130.413	80.3778	116.243	96.6261	161.018	342.268	129.356	102.244	121.435	105.716	134.143	183.993	211.388	83.757	118.968	107.587	302.997	125.639	83.3469	225.748	139.457	136.433	131.994	111.712	218.636	124.062	273.67	315.554	155.611	263.522
499.422	153.365	143.056	72.4474	104.462	87.4282	145.273	121.82	96.8997	122.757	97.7203	127.284	199.305	156.932	108.88	99.7114	91.3225	119.918	252.11	107.803	124.921	129.726	123.042	247.106	190.184	180.406	192.825	151.774	171.354	138.717	146.548	336.012	127.228	313.19	303.565	175.988	297.747
529.422	117.576	151.352	126.968	117.296	71.9913	119.489	99.3826	138.186	92.8514	105.397	103.951	272.846	235.297	91.0827	108.093	96.9265	129.933	202.791	145.783	102.178	153.041	59.9436	181.103	145.985	265.021	324.683	110.354	150.694	168.148	184.086	261.466	188.818	219.932	276.704	187.361	301.591
559.422	121.785	193.393	155.738	133.132	126.141	138.915	163.228	91.4544	91.9266	128.68	101.206	269.97	195.373	107.402	153.607	96.607	133.668	294.785	116.87	68.5258	114.939	100.87	152.771	248.23	124.622	127.625	154.061	124.02	154.521	189.552	201.965	129.741	329.301	278.301	183.295	313.413
589.422	124.355	159.796	165.224	150.833	125.577	98.0613	101.339	97.4652	87.6605	116.33	128.402	299.122	222.176	100.961	133.785	72.8805	98.2663	194.634	156.576	112.598	125.03	126.412	305.926	204.34	198.843	178.094	259.988	166.886	155.72	226.644	164.483	112.726	345.207	280.097	187.125	438.603
619.423	129.525	145.337	167.634	94.2313	104.199	131.268	120.989	84.4013	127.179	113.747	122.169	414.464	199.752	157.682	126.152	119.613	135.194	280.784	112.805	70.2983	155.976	93.8926	317.488	220.49	212.315	188.078	215.991	156.404	246.067	242.129	240.923	106.514	286.265	248.606	319.869	356.82
649.433	175.893	154.175	144.743	84.5659	100.173	182.257	121.676	77.9747	119.29	164.082	126.211	315.195	215.721	128.211	236.872	104.782	116.758	271.243	184.546	101.007	159.698	121.686	283.945	240.452	255.454	153.626	454.273	173.816	248.347	241.795	291.117	167.7	381.039	367.067	248.618	248.347
679.433	171.249	130.276	106.7	122.971	132.796	114.043	72.8998	97.2818	166.28	152.346	132.812	307.055	247.002	109.55	163.276	134.651	111.406	218.638	126.556	133.956	165.658	136.668	250.37	215.035	259.213	154.609	332.318	151.151	269.982	328.643	221.376	126.749	378.026	382.051	273.632	292.694
709.433	192.533	172.866	119.634	113.019	97.6029	125.792	91.0023	60.246	109.832	144.471	132.699	334.812	262.822	115.602	164.516	74.3227	151.175	203.77	128.796	71.4483	181.046	111.906	298.164	347.913	249.246	159.166	402.361	135.718	268.453	305.688	269.76	136.477	323.75	242.161	280.085	243.056
739.433	185.549	311.585	145.952	99.4952	79.56	79.7824	143.282	110.239	152.283	147.661	131.062	357.284	273.148	119.759	116.602	80.3119	111.112	185.969	108.262	92.0971	142.753	147.147	268.592	315.556	205.862	171.797	309.44	171.546	344.213	269.835	213.805	157.316	369.658	243.862	337.047	250.029
769.433	334.187	242.942	139.373	111.607	143.211	73.2674	125.205	73.0926	114.141	127.581	141.783	288.772	219.918	128.407	172.94	130.916	151.938	220.941	143.781	107.302	160.559	110.4	269.335	339.487	248.742	148.054	410.336	207.188	329.764	253.77	233.787	177.661	425.959	315.858	377.712	260.388
799.433	277.53	153.706	118.39	124.346	95.6433	175.273	127.716	98.6406	157.389	179.906	107.178	338.639	244.174	122.078	147.458	114.541	131.486	246.633	97.0213	46.8492	158.804	129.499	326.064	262.48	193.682	195.611	400.219	167.066	351.833	279.339	254.819	158.66	423.531	297.595	284.946	411.734
829.433	279.857	257.147	142.476	105.276	85.4485	108.833	88.913	53.9542	171.452	153.352	128.662	390.307	183.142	119.734	154.738	158.244	126.025	266.148	120.208	101.624	181.417	159.082	217.631	233.039	368.018	146.598	348.338	172.214	238.45	196.134	267.044	175.638	392.082	392.793	331.412	286.724
859.434	328.624	185.612	114.144	119.999	122.079	76.4252	155.312	156.941	140.419	175.948	112.238	308.724	244.575	116.955	250.834	84.6062	104.16	287.572	197.31	115.725	167.248	215.094	164.627	439.579	289.745	180.925	382.176	179.317	222.747	272.102	241.162	190.953	477.072	234.353	278.028	302.354
889.444	255.101	212.996	115.163	117.468	89.398	135.772	132.474	117.704	145.917	188.166	152.757	343.663	246.188	147.246	246.305	123.891	143.884	217.733	116.879	102.44	191.041	287.707	214.641	289.746	174.439	269.374	704.718	167.723	293.269	236.314	281.182	131.43	411.847	306.279	301.996	251.235
Channel,001 - GFP	RAW DATA imported LAS AF software																		Channel,001															Channel,001
Axis [s]	ROI1 []	ROI2 []	ROI3 []	ROI4 []	ROI5 []	ROI6 []	ROI7 []	ROI8 []	ROI9 []	ROI10 []	ROI11 []	ROI12 []	ROI13 []	ROI14 []	ROI15 []	ROI16 []	ROI17 []	ROI18 []	Axis [s]	ROI1 []	ROI2 []	ROI3 []	ROI4 []	ROI5 []	ROI6 []	ROI7 []	ROI8 []	ROI9 []	ROI10 []	ROI11 []	ROI12 []	ROI13 []	ROI14 []	Axis [s]	ROI1 []	ROI2 []	ROI3 []	ROI4 []	ROI5 []	ROI6 []	ROI7 []	ROI8 []	ROI9 []	ROI10 []	ROI11 []	ROI12 []	ROI13 []	ROI14 []	ROI15 []
0	1383.2	2893.1	2443.1	3036.3	4198.6	1924.9	3544.2	1392.4	7714.6	1314.1	3398.8	2081.7	2963.6	3735.2	2166.7	3406.2	2340.9	6791.8	0	7295.4	10982.1	6453.9	3718.7	14578.6	3314.4	2751.6	10817.8	11820.9	6322.4	4245.4	14340.8	3936.8	2526.3	0	5725.6	4729	1702.8	1959.2	11511	3016.7	1307.1	1935.6	1046.3	2152.6	1863.2	5675.1	4572.1	2818.3	2431
5.16	1512.4	3978.8	1973.4	3143.6	3742.3	2097.3	3229.5	1953.5	7253.9	1462.9	2628.3	2074.6	3122.6	3908.3	1892.8	3252.4	1476.8	7415	5.16	7490.5	12701.5	6434.2	3510.1	13400.8	3351.1	2858	13327.7	11676.5	6104.5	3751.7	14120.3	3420.1	2712.7	5.16	5802.2	3718.8	2609.2	2143.5	10974.2	3698.7	1549.5	1665.2	1559.7	1791.6	1474.4	5460.7	4560.9	2285	1470.8
14.16	991.8	2339.8	2338.7	2719.8	3189.6	1591.4	2172.4	1084.2	3939.2	1194.5	3199.7	1727.8	2440.2	4181.2	1502.8	3948.5	1984.8	6592.3	11.88	4725	6525.9	3199.3	3169.2	7400.7	1966.2	2395.4	10895.3	13350.4	5582.6	4276.8	15712	3602.1	2659.6	13.65	3934.3	2860.4	1658.8	1602.8	7011	2588.3	1041.9	1144.9	1035.7	1405.8	1222.8	6349.1	4871.9	2878.7	1988.6
19.4	833.3	1958.4	2328.7	3709.1	2477	1481	2594.3	1395.4	6434.2	1245.7	3016.1	1556.6	2803.5	2858.1	2251.7	2890	1783.3	5546.2	17.11	6729.6	8791.1	3874.7	3202.2	8164.1	2241.9	2975.1	12479.8	11135	5632	3153.5	14922.4	3272.2	3360.5	18.9	5001.2	3010.3	1863.8	1501.2	8655.3	2205.3	1690.1	1646.7	1242.2	1456.6	1253.2	5538.7	4563	3064	2005
49.4	1334.4	1816.5	2048.1	2190.3	3265.8	1904.4	3029.2	1902.5	6156.3	1302.9	2827.4	2116.8	2735.1	2927.7	3243.9	3110	1532.1	6659.8	47.11	5025.9	9376	3439.5	3784.8	10644.5	2541.8	2396.3	10623.3	10312.8	6027.4	3916.5	13252.1	4151.3	2782.2	48.9	5540.2	4113.2	1715.8	1808.3	8722.2	2525.5	1998	1728.7	1400.8	2127.9	1169.3	5680	3947.8	2763.5	2707.4
79.4	1234.3	2149	2317.7	2680.2	3594.2	1725.3	2549.7	1923	7663.8	1130.7	2898.9	1825.2	3614.2	4148.4	1563.8	3034.3	1832.1	5358	77.111	4303.5	10248.2	5246.4	4394.1	14926.4	2514.3	2131.6	9411.9	11376.6	5641.4	3318.2	12028.2	3163.1	3033.8	78.901	4937.3	3703.2	1876.6	1749.2	11234.7	2090.5	1325.8	1173.7	1104.2	1646.4	1627.9	6219.3	4363.2	2353.5	1791.7
109.401	1232.5	2168.9	2099.2	3081.1	3080.1	2094.7	2869.3	1579	6901.6	1235.7	3745.6	2553.1	3119.3	3671.2	1574.2	3444.6	1546.3	6274.6	107.111	6381.7	11556.3	4946.2	4437.5	11167	2296.4	1732.8	6911.9	10552.7	5605.2	4493.7	12406.6	3261.4	2406.4	108.911	7795.6	4279.3	2393.6	1774.4	10007.9	2303.4	1562.6	2033.8	1209	1733.3	1615.2	6972.4	4795.4	2937.5	1736
139.411	1549	2590.2	2399.7	3497	2972	2153.6	2570.5	1027.9	7006.6	1467.4	2480.4	2314	2532.3	3311.3	1643.5	2991.8	1602.1	5926.9	137.111	7710.9	9804.4	5878.4	4232	11513.4	1699.3	2536.3	8901.9	11277.4	5675.9	3674.3	12768.8	2458.3	2204	138.911	7312.4	4318.9	2194.9	1535.7	10098.2	2867.6	2142.6	1599.1	1113.5	1756.1	1888.2	7019.5	3873.8	2651.9	1100.3
169.411	1245.7	3061.1	2481.9	3168.8	3079.4	1776.5	2541.3	1431.7	6884.8	1101.5	2519.9	2152.7	3458	3476.3	2649.5	3261.5	2063	6292.2	167.111	9513.3	9861.7	6577.1	4738.4	11627.5	2981.4	1712.6	9345.7	11634.9	4416.5	3353.9	10247.6	2957.5	3309.4	168.911	6693	4885.1	1781.7	2194.2	10263.4	2748.5	2275.7	1806.2	930.7	2373.8	2478.2	4813.3	4489.4	2310	1714.7
199.411	1417.8	3163.3	1457	3243	2529.1	1657.3	3850.1	1324.1	7083	1389	2350.7	1608	2978	2386.2	2993.4	3768.7	1557.4	4724.7	197.111	9552	9715	5656.4	3959.8	11122.1	3258.3	2607.5	9113.1	12350.4	6458	3852	13128.8	3508.9	2554.2	198.911	5320.9	5360.6	1880.8	2053.9	10634.7	2449.5	2941.7	2589.4	1638.7	1519.8	2705.4	5596.8	4179.6	2617	2009.2
229.411	1412.4	4287	2519.6	3159.5	3279.2	1668.4	2300.1	1681.5	5661.8	1278.9	2434.7	2531.7	3637.2	3346.9	1887.3	3216.2	1805.5	4828.1	227.121	9902.8	12402.9	5637.6	5182.7	12820	2114.5	3610.2	7816.3	11864.4	5307.5	3072.5	11104.2	3730.6	2831.8	228.911	6273.7	5418.4	2245.4	1255.4	11252.8	3308.1	2807.9	2187.3	1207	2429.8	1824.5	4990	4108	2786	1787.6
259.411	1543.5	3522.9	2217.4	3534.6	3385.8	1210.6	2745.3	1405	5718.4	1363.5	2321.9	1477.7	3401.4	3206.7	1956.8	3117.2	1438.7	4718.5	257.121	9322.4	12527.3	6086.9	5157.9	11964.4	2355.4	2709	8400.7	10293.8	5136	3690.4	12610.5	3443.5	3251.5	258.911	5415.9	5433.6	2191.6	1484.7	11038	4666.5	3699.2	1883.8	1894.4	2303.2	1830.6	5263.4	4452.1	2115.4	1772.4
289.411	1474.4	3168.7	1558	4213.1	3191	1645.6	3043.4	1527.7	4632.4	1122	2934.3	2576.5	3709.6	2324.7	1762.2	2750.8	1656.6	4292.3	287.121	8844.2	11932.2	6986.4	4584.8	10952.1	1914.8	2586.7	10108.4	11351.4	5612.9	4286.4	11245.3	4205.1	3646.4	288.911	5853.1	5984.2	2373.1	1522.3	10827	4487.7	5363.9	2021.7	1680.4	2090.5	1739	5663.9	4668.2	1802.8	1491.8
319.411	1259.2	2835.7	2575.5	3350.5	3074.1	1879.3	2994.5	1184.9	6061.7	1346	2757.9	2428.7	3313.7	2930.7	1849.3	2924.1	2278.9	4697	317.122	10242.1	12915.8	5278.1	5440.3	14070	2331.1	4171.5	9014.3	11495.6	6055	3687.1	11665.9	3479.1	2827	318.912	4602.8	6297.3	2046.7	1807.5	10987.5	4905.4	3862.1	3369.9	1579.5	2300.7	2200.2	6736.4	4865.9	1632.8	2131.5
349.411	1246.7	3789.3	2613.9	3319.1	3007.6	2046.3	3081.3	1314.3	5901.3	1057.9	2715.2	2332.5	2950	2699	1817.2	3240.6	1779.1	6267.4	347.122	10794.5	12643.7	8011.1	3941.7	14234.7	3248.3	3127.3	7916.8	10530.4	5712.2	3240.4	11278.4	3088.2	2651.8	348.922	4347.5	5757.7	2631.3	1619.9	10755.3	4277.3	5524.6	2010	1770.6	2338	1494.5	6311.1	4282.6	1256.6	1737.9
379.412	1384.6	3689.3	2608.6	3391.9	3170.2	2014.1	3089.7	1747.2	6199.8	1308.2	2635.6	2444.2	2769.1	2880.9	1373.6	3388.3	1625.5	5160.5	377.122	10051.8	11038.5	8697.8	4969.6	12080.6	3123.4	2933.7	11730.6	8656.9	7005.2	3471.4	11622.3	3252.8	2876.6	378.922	5174.2	6469.4	2989.2	1865.3	11753.4	4109.3	5003.9	2851.6	1396	2779	2023.7	5001.5	3964.7	1710.5	1869.5
409.422	1332.5	2993.7	2190.9	4607.1	3412.9	2336.5	3717.4	1917.2	5557.1	1869.7	2085.4	2395.9	2713.9	3113.9	1691.1	2882	1929.2	6047.9	407.122	9029.5	13299.3	10320.1	5253.3	12003.3	3353.6	3469.9	9700.7	12462.7	3942.8	3635.2	13180.4	2316.4	2556	408.922	6086.1	6514.7	2612.8	1507.7	10404.9	3686.6	4222	2987.8	1629.5	2306.6	2564.4	5157.8	3947.7	2064.7	1554.6
439.422	1605.3	3573.5	2095.8	3398.1	3032.2	2072.4	3177.5	2021.5	5776.2	1419.8	2428.5	2287.5	3328	2616.2	1339.7	2361.7	1896.7	5192.1	437.132	9539.8	11619.8	14063	4865.8	12347.3	3975.7	2940.2	11486.1	9512.3	4229.5	3569.5	13818	2670.1	2571	438.922	6339	8071.1	2357.1	1548.1	12524.4	3966.1	4428.3	3001	2506	2478.8	2263.5	5125.8	3583.5	1285.8	1389.8
469.422	1743.1	3653.8	2539.3	3037.6	3023.3	2618.5	3072	1144.5	5373.7	1535.1	2275.7	2270.7	2800.7	2514.3	1532.9	2355.6	1423.9	4622.8	467.132	9723	14734.8	14366	4606.9	12736.9	3815.6	3020	10062.5	9151	4197.3	3561.4	12457.4	3142.1	2856.7	468.922	5718.4	7547.4	2632.2	1532	10852.9	4010.3	3902.6	2360	1531	2747.8	2673.4	4262.9	4102	1245.2	1829.1
499.422	1968.9	3056.1	2225.8	2797.9	2587.7	2051.4	3047.7	1337.7	5874.9	1283.8	2136.3	3072.3	2678.4	2959.8	1412.1	2501.8	1380.5	4785.8	497.132	9113.3	11415	10467.1	5168.1	13406.2	2867.4	3068.8	9325.9	8968.1	5251.8	3293.2	12312.8	2875.7	3360.4	498.922	5316.2	8931.5	2098.6	1938.4	11787.4	2821.1	3556.1	2722.1	1847	2488.6	2416.7	4433.2	3542.7	1946.7	1551.7
529.422	1616.9	3912.9	2570.6	2960.2	2490.9	2093.8	3332.2	1611.8	4644.8	1375.2	2585.3	2024.6	2523.7	3460	1752.3	3352.9	1166.4	5002.4	527.132	10159.4	10641.5	11335.4	6229.5	11298.9	3260.3	2869.8	9639.2	10237	4154.5	2647.5	12405.1	3016.2	2960.8	528.922	5674.7	8698.7	2321.3	1763.7	11624.2	2230.2	2724.7	2257.8	2469.2	2947.8	2060.3	4367.4	4289.5	1592.3	1726.1
559.422	1587.1	4004.4	2478.1	3853.9	3404.3	1887.3	2893.7	1335.6	5322	1303.2	2070.6	1591.2	2894.8	2698.8	1358.6	1772.8	1460.4	5789.4	557.132	10611.2	11260.9	12429.7	6477.4	11637.9	3304.4	2904.2	8246.2	11126.7	4604.1	3315.4	10835.8	2151.2	3006.2	558.923	6478.2	9247.4	2045.1	1394.5	11824.2	3499.5	2908.3	3140.6	2067.6	2435.6	2378.4	4846.5	3137	1749.9	2035
589.422	1908.1	3718.3	2725.7	3251.2	3092.7	1674.2	2974.6	1322.7	5775.6	1534.4	2326.9	1649.7	2155.5	2462.8	1707.3	2935.3	1357.1	6588.6	587.133	9698.4	11872.3	12228.1	7107.4	10974.1	3566.3	2283.2	8337	9246.2	4088	3199	10869.6	2665.7	3132.8	588.933	5605.6	7163.9	2435.7	1733	11659.4	2747.7	3918	2415.5	1426.7	2888.5	3098.8	5704.5	3680.7	1555.6	1539.1
619.423	1661.8	2932.9	3167.1	2824.3	2888.7	2284.2	3008.4	1113	6419	1283	2018	1889.3	2997.2	2772.3	1740.1	2486.5	1318.7	5047.2	617.133	10765.2	12870.4	16181.1	7250.4	15151.8	3735.6	3100	9464.2	10534.9	3904.1	3629.7	9609.1	2961.2	2591.7	618.933	5978	8304.2	1677.3	1456.3	12887.5	2773.4	4221	3231.5	2082.6	2674.1	3286.3	4421.8	2957.5	1486.9	2071.6
649.433	1931.3	2643.8	2929.3	2576.3	3303.9	2461.2	2666.4	1421.4	6587.1	1098	1714.8	2023.8	3046.5	3298.2	1350.4	2191.4	1822.9	5521.9	647.133	13139.7	12885.5	15561.8	7577	14947.9	4216.8	3159.9	8008	10209.5	4937.2	3512.4	11658.8	1780.2	3015.7	648.933	4800.4	9126.8	2419.4	1705.6	13556.9	2678.8	4743.3	3041	2049	2385.2	4821.2	4111.4	3364.8	1311	1688.6
679.433	2100.2	2568	2149.9	3351.7	3351.1	2066.8	2546.1	1292	7276.4	1226.4	1971.2	2014.9	2725.6	2523.5	1812.3	3492.6	1328.1	4376	677.133	13626.7	12447.3	13339.7	7097.6	11186.3	5121.8	3348.1	8944.6	9372.1	4344.4	2873.5	10211.1	3136.9	2486.5	678.933	5350.5	8903.6	2563.9	1908.6	12420.9	3567.3	4837.9	3612.8	2464.6	2319.6	5064.2	4802.7	4072.3	2025.9	1424.8
709.433	2104	3623.1	2288.6	3292.8	2703.6	1869.9	2095.6	1204.8	6964	1092.8	2095.9	1913	2913.5	2770	1486.5	2302.8	1999.8	6340.6	707.143	14709	12047.2	12440.6	7512.5	12942.3	4670.6	2493.6	10181.3	9078.6	3715.7	2858.4	11195.6	2839	3355.1	708.933	5421.3	6816.1	2044.9	1292.5	14591.2	3601.8	4418.2	3741.8	2612.6	2507.5	4755.1	3586.1	3345	1587.7	1809
739.433	1962	4510.5	2824.9	2581.8	2325.3	1554.8	3149.2	1423.3	6337.1	1057.4	1447.6	1935.5	2594.9	2922.7	1948.8	2197.9	1291.1	4161.4	737.143	13054.7	11816	11217.3	7007.6	12461.9	3795.4	2075.1	8841	9015.6	3139.6	2565.5	10405.8	3255	2583.8	738.933	3869.7	7723.3	2471.3	1278.4	11893.5	4128.8	3738.8	4186.8	2648	2435.4	6175.5	3482.7	4153	2282.7	1388.1
769.433	3132	4359.1	2658.4	3220.3	3055.4	1288.7	3050	1202.3	5123.2	937.2	1794.3	1907.4	2885.4	2133.5	1758.9	2436	1644.9	4488.5	767.143	10698.7	12707.7	11707.1	5392.4	13115.7	5782.6	3455.4	8385.8	8962.8	4054.1	2452	10214.2	3343.7	2639.4	768.933	5634.3	8211.7	2635.5	1554.7	13568	3730.2	4212.4	4260.9	2501.1	2975	4998.3	3708.3	3716.7	1833	1448.9
799.433	3186.6	3241.2	3160.9	3294.3	3286.4	2103.1	2120.6	1422.2	7554.5	1148.2	2108.7	2669.9	2649.3	3436.1	1199.9	1660.4	1441.8	4799.9	797.143	12622.9	11804.3	14147	5988.6	10762	3857.5	3188.7	7016.4	11013.7	4177.6	2452.6	8815.7	2616	2783.9	798.933	5386.6	7621.2	2804.4	863.9	13359.2	3549.7	3951.9	3728	2563	2535.7	4931.1	4096.7	3090.1	2890.5	1844
829.433	3128.8	5640	2841.4	2857.5	2911.4	1713.9	1845.3	1271.7	6718.7	1118	2193.3	1994.3	2714.3	3407.2	1574.8	2075.4	2357	3918.7	827.144	14215.3	12684.1	12832.9	6411.8	11579.1	3925.7	3421.4	9269.7	9858.5	3287.9	3501	9670.7	2537	2162.1	828.934	4747.1	9125.4	2851.1	1414.3	13231.3	4402.6	2884.7	3611.4	3249.6	2577.2	5639.6	3766.8	3428.7	2371.8	1391.7
859.434	3747.3	4174.6	2326.6	3315.1	2892.3	1516.2	2302.5	1858.5	6676.8	1140.3	2249.1	2038.3	2762.6	2369.2	1983.9	1482.5	1184.2	4754.9	857.144	13580.9	12347.8	14608.2	7849.4	11840.5	5233.4	2913.5	7718.7	11001.4	4731.8	3209.4	10124	2086.4	3443.6	858.944	4577.3	8846.3	4041.1	1208.4	12936.8	4534.4	2984.2	4445.9	2621.9	2961.2	5568.3	4394.5	3076.2	2048.1	1044.2
889.444	2620.4	5372.4	2564.8	3234	2542.3	2195.7	2220.4	1628.9	7869.9	1027.2	2522.3	2227.1	2753.1	2843.8	1617.2	1676.1	1383.9	5393.4	887.144	15560	15029.8	15981.7	7633.3	13766	5002.7	3447.9	8269.3	9839	4650.4	3100.6	9349	2031.1	2783	888.944	4748.9	7516.8	3107.8	1775.8	14035.8	5862.9	3081.6	4309.1	2439.7	3767.2	5855.5	3300.5	3452.3	2659	1733.5
[truncated: 26 more columns]

[truncated: 3 more sheets: QQ3, QQ4, Graph]
