# Supplementary material for: KAT2-mediated acetylation switches the mode of PALB2 chromatin association to safeguard genome integrity
Source: eLife. 2022 Oct 21;11:e57736. doi: 10.7554/eLife.57736 (PMC9671498; doi:10.7554/eLife.57736)
Supplement: Figure 7—source data 1. [file elife-57736-fig7-data1.xlsx]

## Sheet: 7B - RAD51 foci 4d Dox
RAD51 foci in EdU+ cells, Dox 4 days		Cell line: U2OS shPALB2 EV, WT and variants (flag)
n= 200 cells/ trial		IR, 4Gy + 3 hr release
Total n= 600 cells over 3 trials	cell	EV	WT	7Q	7R
Trial 1	1	1	20	7	7			Trial 1
	2	0	41	52	11			Trial 2
	3	8	39	38	3			Trial 3
	4	7	53	6	4
	5	2	50	7	5
	6	1	26	3	8
	7	8	20	7	22
	8	0	41	4	6
	9	3	35	4	12
	10	1	30	9	0
	11	0	14	0	0
	12	0	23	2	3
	13	1	17	13	6
	14	1	11	5	1
	15	0	18	24	3
	16	0	8	4	10
	17	0	33	25	9
	18	0	30	10	6
	19	0	3	8	9
	20	0	8	5	3
	21	0	10	5	3
	22	12	25	46	4
	23	0	8	25	1
	24	10	19	16	7
	25	23	19	12	0
	26	0	30	16	0
	27	0	25	3	11
	28	0	10	11	6
	29	2	13	30	2
	30	0	2	20	3
	31	0	4	15	5
	32	2	28	20	9
	33	0	6	21	2
	34	0	22	23	23
	35	0	47	0	30
	36	0	6	1	5
	37	0	30	3	12
	38	0	18	6	5
	39	0	9	3	39
	40	0	14	13	16
	41	0	4	22	23
	42	0	34	0	7
	43	0	33	4	1
	44	0	4	15	4
	45	0	12	11	3
	46	0	21	0	21
	47	0	0	2	3
	48	0	6	1	0
	49	0	6	3	17
	50	0	18	14	9
	51	0	3	8	4
	52	0	3	1	5
	53	0	3	23	0
	54	0	7	10	21
	55	0	23	20	14
	56	0	16	2	1
	57	0	30	10	7
	58	0	5	3	0
	59	0	14	13	0
	60	0	8	9	12
	61	0	5	2	21
	62	0	55	2	0
	63	0	8	4	34
	64	0	4	11	23
	65	0	24	5	31
	66	0	9	34	3
	67	0	1	10	0
	68	0	28	22	9
	69	0	13	8	3
	70	0	2	14	2
	71	0	19	22	3
	72	0	26	1	3
	73	0	6	11	0
	74	0	0	14	0
	75	0	1	27	0
	76	16	8	20	9
	77	0	7	23	5
	78	0	3	7	22
	79	5	10	5	0
	80	1	51	9	2
	81	1	17	9	6
	82	0	13	5	0
	83	0	19	8	18
	84	0	20	12	2
	85	1	6	11	5
	86	0	28	2	20
	87	0	18	7	0
	88	1	61	12	0
	89	0	8	20	0
	90	0	30	6	8
	91	1	8	5	1
	92	0	14	9	3
	93	1	29	2	32
	94	0	13	6	15
	95	12	32	22	23
	96	1	16	12	0
	97	4	22	16	4
	98	0	62	0	5
	99	0	46	2	0
	100	0	26	7	5
	101	3	22	10	1
	102	0	35	1	0
	103	0	54	4	0
	104	0	61	5	0
	105	0	36	0	6
	106	0	48	0	0
	107	0	36	2	2
	108	0	12	3	1
	109	0	47	0	3
	110	0	53	0	5
	111	0	10	0	16
	112	0	20	1	11
	113	0	30	1	0
	114	0	0	2	0
	115	0	36	0	0
	116	0	0	0	1
	117	6	7	22	5
	118	0	19	5	2
	119	0	6	0	1
	120	0	3	1	7
	121	0	24	0	0
	122	4	23	2	1
	123	0	3	4	11
	124	0	4	17	0
	125	11	6	5	0
	126	0	12	6	0
	127	0	19	15	0
	128	19	0	11	0
	129	62	9	7	19
	130	3	4	0	0
	131	43	6	0	2
	132	38	17	30	3
	133	1	13	6	18
	134	36	11	9	3
	135	8	12	0	2
	136	37	4	1	6
	137	5	2	0	15
	138	48	5	0	19
	139	6	4	0	8
	140	33	2	16	37
	141	12	5	0	30
	142	4	16	1	17
	143	5	0	3	19
	144	3	1	41	15
	145	7	4	6	4
	146	14	0	7	0
	147	9	6	1	0
	148	4	3	1	0
	149	7	7	0	0
	150	1	0	18	14
	151	4	37	11	11
	152	0	18	0	1
	153	0	2	11	5
	154	3	3	17	0
	155	2	36	18	14
	156	2	6	13	22
	157	3	47	0	12
	158	1	15	21	5
	159	8	37	5	6
	160	1	1	4	1
	161	3	3	3	0
	162	0	14	8	8
	163	0	3	4	1
	164	0	1	0	0
	165	0	3	8	1
	166	0	16	11	20
	167	0	2	25	28
	168	0	12	10	19
	169	1	0	2	10
	170	1	20	13	30
	171	2	12	26	29
	172	0	18	15	33
	173	0	4	11	15
	174	0	1	5	22
	175	2	6	0	2
	176	2	6	25	26
	177	8	1	29	6
	178	9	13	15	3
	179	0	0	50	7
	180	0	0	12	1
	181	5	23	27	1
	182	0	37	11	13
	183	0	44	3	6
	184	0	27	11	6
	185	0	13	6	12
	186	0	17	23	5
	187	0	30	9	5
	188	0	1	7	7
	189	0	14	25	3
	190	0	4	25	7
	191	2	24	8	12
	192	0	23	21	10
	193	0	4	1	11
	194	0	0	0	15
	195	0	11	3	12
	196	0	2	2	37
	197	0	6	15	30
	198	0	6	5	23
	199	0	22	9	28
	200	0	6	1	34
Trial 2	201	0	12	14	11
	202	0	8	12	3
	203	1	9	13	2
	204	3	19	0	1
	205	1	2	0	22
	206	0	0	9	0
	207	2	6	3	0
	208	0	19	5	20
	209	1	10	11	7
	210	2	2	3	2
	211	5	3	4	0
	212	1	25	20	2
	213	1	7	1	10
	214	5	0	0	3
	215	1	0	11	11
	216	2	1	17	12
	217	3	2	1	12
	218	3	4	23	9
	219	1	30	10	0
	220	1	9	7	12
	221	1	19	6	3
	222	2	13	3	16
	223	0	4	11	22
	224	3	4	26	8
	225	0	30	6	7
	226	1	2	10	2
	227	0	1	9	17
	228	0	17	1	6
	229	2	7	2	0
	230	25	2	1	1
	231	15	11	11	5
	232	34	10	21	42
	233	1	1	23	1
	234	0	13	11	6
	235	1	32	1	6
	236	1	49	15	17
	237	2	17	5	7
	238	2	20	17	18
	239	0	8	2	0
	240	1	23	2	1
	241	5	17	0	3
	242	2	26	9	33
	243	0	12	7	10
	244	2	6	17	15
	245	3	25	6	4
	246	10	7	0	32
	247	6	13	4	13
	248	0	6	9	47
	249	0	13	0	12
	250	0	5	13	13
	251	0	12	0	18
	252	0	3	9	39
	253	0	8	0	28
	254	4	1	7	0
	255	6	4	1	0
	256	6	12	0	32
	257	7	4	0	27
	258	9	19	6	25
	259	6	15	7	8
	260	4	1	9	0
	261	5	1	12	12
	262	5	12	16	1
	263	7	2	6	4
	264	3	19	1	4
	265	17	12	18	6
	266	1	25	2	9
	267	8	7	9	9
	268	7	27	13	9
	269	8	5	10	2
	270	7	11	6	7
	271	0	19	4	23
	272	7	39	6	3
	273	11	24	12	6
	274	3	10	4	2
	275	5	23	2	13
	276	3	19	3	8
	277	3	15	0	6
	278	0	3	0	3
	279	5	15	0	17
	280	1	4	2	13
	281	0	2	2	46
	282	8	31	1	21
	283	0	6	33	16
	284	0	18	7	25
	285	1	24	30	13
	286	5	51	1	5
	287	9	47	0	24
	288	0	34	8	20
	289	1	24	1	4
	290	1	45	2	19
	291	1	24	1	0
	292	0	71	15	14
	293	1	25	21	1
	294	1	61	2	1
	295	6	13	11	8
	296	0	13	0	13
	297	1	84	10	16
	298	33	17	10	16
	299	8	25	10	23
	300	32	6	4	27
	301	24	5	1	3
	302	8	16	1	17
	303	5	12	12	14
	304	1	10	3	17
	305	0	28	1	45
	306	3	1	0	22
	307	4	5	5	3
	308	1	18	19	15
	309	0	4	1	16
	310	3	10	7	12
	311	0	12	4	21
	312	0	10	0	13
	313	0	21	0	2
	314	5	18	0	4
	315	1	10	4	3
	316	1	0	42	8
	317	0	2	42	0
	318	2	21	39	2
	319	1	4	11	15
	320	1	2	39	2
	321	1	2	22	11
	322	0	1	21	18
	323	1	11	24	28
	324	5	6	34	3
	325	2	23	23	4
	326	0	6	5	3
	327	1	0	10	3
	328	0	10	18	27
	329	0	9	13	37
	330	0	0	56	39
	331	0	13	20	26
	332	0	52	15	91
	333	0	20	35	12
	334	2	16	26	28
	335	0	39	32	19
	336	5	48	37	25
	337	4	5	15	18
	338	7	43	18	26
	339	9	44	24	24
	340	13	21	19	36
	341	7	7	12	24
	342	12	9	19	23
	343	12	19	22	18
	344	4	0	3	10
	345	2	3	8	27
	346	0	5	33	9
	347	2	15	1	5
	348	2	10	28	84
	349	5	21	9	37
	350	2	7	7	6
	351	1	21	8	32
	352	2	8	15	15
	353	2	13	15	1
	354	0	7	23	11
	355	1	37	5	4
	356	0	24	36	0
	357	0	15	14	0
	358	1	21	13	2
	359	0	8	34	1
	360	0	12	19	1
	361	0	31	27	19
	362	0	10	22	10
	363	0	10	1	6
	364	0	10	2	4
	365	0	8	31	1
	366	0	12	5	4
	367	0	12	8	7
	368	0	13	2	0
	369	1	7	1	0
	370	1	8	15	0
	371	1	0	12	0
	372	0	18	1	13
	373	0	69	13	13
	374	0	26	4	1
	375	1	73	7	4
	376	0	68	15	1
	377	1	38	12	1
	378	0	59	15	0
	379	0	35	6	4
	380	0	22	15	5
	381	1	38	9	0
	382	0	18	12	11
	383	1	36	7	0
	384	1	14	14	0
	385	1	10	12	3
	386	1	27	2	4
	387	0	16	9	2
	388	5	27	22	0
	389	0	18	38	6
	390	5	14	7	2
	391	0	12	2	18
	392	2	34	39	0
	393	1	22	7	0
	394	0	13	0	6
	395	7	7	13	5
	396	3	16	5	13
	397	2	44	3	2
	398	1	17	40	2
	399	5	0	5	2
	400	3	14	0	0
Trial 3	401	0	17	8	1
	402	0	40	15	10
	403	3	20	10	0
	404	2	12	7	5
	405	0	10	32	20
	406	0	8	4	11
	407	2	9	21	5
	408	0	28	18	0
	409	0	16	25	3
	410	3	20	16	7
	411	0	20	19	10
	412	0	12	9	1
	413	6	38	12	1
	414	1	18	19	1
	415	2	50	35	1
	416	0	22	24	5
	417	2	32	28	1
	418	0	12	14	7
	419	0	12	5	5
	420	1	11	9	10
	421	0	10	23	18
	422	0	43	22	4
	423	0	7	12	1
	424	0	14	3	10
	425	0	9	0	17
	426	1	19	0	8
	427	0	38	2	30
	428	0	16	7	17
	429	1	9	6	34
	430	0	6	0	3
	431	4	29	0	50
	432	4	19	12	3
	433	4	17	4	0
	434	2	14	14	13
	435	2	10	1	18
	436	3	1	21	1
	437	0	37	1	1
	438	0	7	0	0
	439	2	5	5	11
	440	4	23	5	3
	441	2	19	6	0
	442	0	25	17	2
	443	4	0	4	16
	444	1	25	1	15
	445	1	11	1	9
	446	3	29	1	7
	447	0	7	11	3
	448	0	4	15	5
	449	0	23	5	13
	450	2	4	2	11
	451	4	27	0	11
	452	0	38	1	18
	453	0	11	0	7
	454	0	0	8	4
	455	0	5	11	3
	456	0	26	15	4
	457	0	41	4	7
	458	0	24	1	3
	459	0	5	1	8
	460	0	1	16	5
	461	0	13	10	8
	462	0	4	4	2
	463	0	24	3	11
	464	0	28	1	2
	465	0	12	0	12
	466	0	33	1	7
	467	0	11	3	13
	468	0	10	9	13
	469	0	3	7	27
	470	0	0	11	17
	471	1	0	9	53
	472	0	4	11	39
	473	0	9	3	33
	474	0	5	0	26
	475	1	5	7	22
	476	0	29	0	9
	477	0	13	7	33
	478	0	4	14	28
	479	1	13	20	30
	480	1	24	12	16
	481	0	12	8	0
	482	6	10	7	29
	483	3	6	5	30
	484	1	10	3	33
	485	3	17	7	37
	486	4	25	2	5
	487	2	10	2	12
	488	1	4	5	0
	489	1	8	15	15
	490	0	21	11	1
	491	0	15	8	7
	492	0	22	5	2
	493	0	16	24	7
	494	0	9	5	4
	495	0	6	15	1
	496	0	12	9	1
	497	1	6	3	0
	498	2	17	20	8
	499	3	10	25	9
	500	0	25	6	5
	501	13	1	5	1
	502	2	21	18	6
	503	1	9	5	4
	504	11	11	3	3
	505	0	12	3	5
	506	0	15	5	4
	507	0	13	24	8
	508	0	35	6	15
	509	0	12	22	8
	510	0	2	0	11
	511	2	12	6	28
	512	8	1	2	10
	513	2	38	5	6
	514	0	23	41	10
	515	1	9	1	9
	516	1	16	10	1
	517	4	15	19	0
	518	4	1	10	0
	519	2	1	16	42
	520	1	2	6	4
	521	2	19	20	0
	522	0	13	13	2
	523	1	2	4	1
	524	1	11	6	0
	525	0	7	4	0
	526	6	23	0	1
	527	1	23	0	2
	528	0	17	0	6
	529	1	3	2	16
	530	0	2	0	2
	531	1	13	4	2
	532	2	9	1	4
	533	0	10	0	0
	534	1	11	4	3
	535	0	23	0	0
	536	0	2	12	0
	537	0	28	1	1
	538	1	19	0	12
	539	1	13	30	0
	540	1	4	3	0
	541	22	17	0	7
	542	6	13	0	2
	543	2	15	11	15
	544	4	13	1	15
	545	2	9	1	28
	546	1	10	14	4
	547	28	10	32	42
	548	48	12	2	0
	549	6	11	6	22
	550	41	21	10	17
	551	2	11	23	0
	552	3	11	25	0
	553	7	5	39	9
	554	2	9	29	9
	555	11	11	24	20
	556	3	0	6	4
	557	42	7	22	29
	558	35	2	38	28
	559	14	9	52	30
	560	13	9	50	19
	561	26	3	38	9
	562	5	4	20	30
	563	19	11	6	35
	564	3	7	15	8
	565	4	2	19	28
	566	43	5	28	7
	567	1	1	32	11
	568	43	11	32	12
	569	8	1	9	31
	570	41	3	23	15
	571	8	1	12	36
	572	6	4	8	18
	573	4	1	9	9
	574	0	0	1	68
	575	0	3	20	11
	576	0	24	7	6
	577	0	20	19	7
	578	0	9	1	28
	579	0	12	6	17
	580	1	13	11	51
	581	0	4	8	75
	582	0	3	18	61
	583	0	7	14	28
	584	0	22	10	41
	585	0	20	9	19
	586	1	8	45	14
	587	0	12	28	26
	588	0	14	12	44
	589	0	27	1	38
	590	1	22	8	33
	591	5	14	5	6
	592	0	5	3	4
	593	2	18	20	20
	594	0	15	0	5
	595	0	35	17	3
	596	3	9	6	1
	597	0	5	2	0
	598	1	14	9	1
	599	1	10	4	17
	600	1	7	13	16

## Sheet: 7C - yH2AX foci 4d Dox
yH2AX foci in EdU+ cells, Dox 4 days		Cell line: U2OS shPALB2 EV, WT and variants (flag)
n= 200 cells/ trial		IR, 4Gy + 3 hr release
Total n= 600 cells over 3 trials	cell	EV	WT	7Q	7R
Trial 1	1	116	77	110	91			Trial 1
	2	76	113	120	139			Trial 2
	3	167	85	91	46			Trial 3
	4	99	109	107	100
	5	117	100	41	95
	6	134	55	44	119
	7	54	107	132	62
	8	127	88	31	116
	9	101	69	60	83
	10	131	67	59	45
	11	97	101	31	50
	12	86	84	99	41
	13	74	91	127	59
	14	113	70	38	27
	15	60	50	79	24
	16	75	10	89	115
	17	71	69	75	90
	18	101	19	94	51
	19	70	54	86	48
	20	79	47	106	80
	21	111	109	74	34
	22	104	65	128	54
	23	108	46	105	104
	24	136	56	123	65
	25	130	100	105	69
	26	135	71	181	11
	27	80	81	122	96
	28	157	42	80	77
	29	67	86	65	93
	30	238	83	103	79
	31	168	59	68	66
	32	91	62	41	72
	33	90	114	45	83
	34	105	70	116	86
	35	95	124	128	58
	36	55	36	104	86
	37	97	77	134	78
	38	68	69	74	87
	39	114	81	77	128
	40	93	117	54	88
	41	77	26	91	75
	42	87	68	88	93
	43	30	73	42	68
	44	98	66	68	116
	45	97	64	63	60
	46	34	107	50	88
	47	48	65	59	71
	48	116	33	38	82
	49	151	80	89	68
	50	80	88	126	26
	51	73	65	60	85
	52	84	102	71	88
	53	102	112	97	22
	54	119	95	72	75
	55	73	99	102	77
	56	62	62	95	49
	57	88	92	78	55
	58	70	110	121	85
	59	67	84	65	39
	60	47	102	72	121
	61	49	124	99	72
	62	83	105	42	24
	63	88	78	59	123
	64	43	38	44	33
	65	93	75	66	143
	66	79	94	77	91
	67	88	96	31	139
	68	97	63	90	81
	69	66	83	57	91
	70	102	31	83	110
	71	102	98	81	80
	72	108	109	40	101
	73	40	102	76	46
	74	44	54	96	1
	75	120	60	89	75
	76	146	70	89	72
	77	183	62	37	97
	78	80	96	80	80
	79	61	38	55	57
	80	133	102	71	86
	81	120	77	69	128
	82	108	49	64	128
	83	61	115	108	106
	84	62	78	112	117
	85	51	108	139	119
	86	64	56	125	94
	87	72	99	108	84
	88	143	72	60	22
	89	100	112	103	95
	90	124	76	57	97
	91	122	81	131	149
	92	162	89	82	101
	93	120	58	36	111
	94	38	67	99	91
	95	72	88	86	53
	96	56	33	63	3
	97	100	69	70	52
	98	68	105	85	38
	99	81	103	43	40
	100	70	51	55	61
	101	34	25	78	114
	102	70	27	103	27
	103	58	112	82	94
	104	87	36	102	23
	105	49	46	103	41
	106	131	33	127	59
	107	70	144	103	62
	108	44	101	116	76
	109	35	134	127	69
	110	73	119	94	79
	111	38	73	110	74
	112	57	54	63	80
	113	68	91	102	60
	114	64	76	151	63
	115	75	92	88	101
	116	36	46	112	89
	117	84	99	90	82
	118	147	75	72	80
	119	71	60	109	62
	120	41	71	103	107
	121	64	83	126	78
	122	49	75	122	101
	123	118	66	107	120
	124	45	82	63	46
	125	54	93	169	76
	126	75	99	120	90
	127	37	99	96	59
	128	55	141	122	105
	129	77	88	118	119
	130	72	40	23	46
	131	113	48	18	85
	132	92	79	122	92
	133	99	98	73	76
	134	114	84	109	116
	135	114	70	65	103
	136	96	148	102	66
	137	113	126	51	80
	138	91	72	67	120
	139	38	22	53	15
	140	96	27	56	103
	141	107	28	137	92
	142	43	11	107	108
	143	42	38	46	134
	144	84	31	91	192
	145	126	118	34	127
	146	68	34	58	70
	147	79	68	101	61
	148	81	47	73	122
	149	120	69	103	117
	150	66	51	71	87
	151	86	94	89	113
	152	160	58	51	263
	153	76	40	108	104
	154	143	53	95	136
	155	115	77	79	97
	156	84	26	82	159
	157	100	103	67	88
	158	43	82	121	78
	159	45	35	108	63
	160	99	81	42	60
	161	84	77	43	154
	162	66	52	30	87
	163	49	37	112	74
	164	64	74	123	72
	165	64	82	46	66
	166	52	86	34	79
	167	26	96	101	76
	168	75	96	51	80
	169	56	70	151	116
	170	66	64	58	70
	171	66	56	108	112
	172	84	40	155	128
	173	94	46	112	66
	174	47	116	88	108
	175	73	96	61	61
	176	102	56	74	141
	177	61	89	137	35
	178	113	113	62	116
	179	73	95	153	72
	180	27	104	58	81
	181	86	102	77	50
	182	41	83	120	130
	183	15	94	54	117
	184	16	106	123	66
	185	63	101	104	78
	186	92	54	114	88
	187	28	90	111	85
	188	120	57	76	38
	189	124	75	97	129
	190	119	68	94	58
	191	96	42	97	80
	192	131	46	70	85
	193	151	90	55	79
	194	147	136	27	71
	195	130	19	63	92
	196	112	119	29	91
	197	123	68	88	68
	198	155	71	90	78
	199	148	82	57	95
	200	137	48	83	95
Trial 2	201	95	162	72	89
	202	77	144	61	57
	203	100	151	68	40
	204	96	78	37	41
	205	82	92	45	78
	206	28	163	94	38
	207	28	120	45	16
	208	47	113	54	54
	209	90	112	70	48
	210	90	146	59	25
	211	50	107	65	24
	212	50	98	52	47
	213	88	114	116	71
	214	126	132	111	39
	215	104	98	72	74
	216	45	81	51	39
	217	57	125	84	54
	218	109	154	119	53
	219	80	116	57	36
	220	55	96	74	76
	221	30	99	121	64
	222	61	104	71	63
	223	31	149	91	85
	224	41	153	79	46
	225	52	70	81	34
	226	45	171	72	58
	227	7	121	125	75
	228	10	76	94	56
	229	51	74	97	141
	230	113	150	139	63
	231	93	114	107	49
	232	116	90	103	115
	233	76	90	126	102
	234	2	71	75	162
	235	17	76	111	76
	236	54	87	78	73
	237	55	139	68	78
	238	85	114	91	81
	239	89	80	131	57
	240	161	112	111	74
	241	160	119	98	94
	242	174	134	67	69
	243	61	53	66	87
	244	140	101	136	115
	245	103	83	122	132
	246	103	47	84	67
	247	69	124	80	69
	248	119	36	113	104
	249	101	107	63	51
	250	61	122	71	74
	251	118	90	35	58
	252	82	58	84	92
	253	36	77	56	87
	254	90	90	66	86
	255	88	88	48	108
	256	108	119	99	80
	257	17	72	64	75
	258	70	106	63	65
	259	93	93	56	52
	260	68	42	39	45
	261	68	32	70	41
	262	49	92	83	47
	263	82	105	88	37
	264	53	72	47	45
	265	86	60	71	63
	266	78	64	95	89
	267	49	73	92	52
	268	102	66	111	126
	269	90	63	57	95
	270	81	68	36	67
	271	39	56	25	89
	272	81	47	117	82
	273	71	81	128	38
	274	52	47	53	74
	275	127	39	77	85
	276	103	36	41	53
	277	176	61	47	66
	278	61	36	33	39
	279	186	60	103	118
	280	115	77	36	74
	281	108	37	86	86
	282	116	51	100	113
	283	194	66	99	73
	284	81	39	78	95
	285	108	100	68	101
	286	236	76	129	120
	287	56	78	120	63
	288	69	55	61	86
	289	71	125	104	122
	290	141	72	107	112
	291	65	48	44	104
	292	105	92	117	68
	293	72	81	127	115
	294	96	107	96	85
	295	90	38	88	105
	296	67	51	43	129
	297	138	83	57	68
	298	91	82	91	78
	299	115	49	89	80
	300	96	73	114	120
	301	102	93	25	50
	302	111	84	14	111
	303	54	78	80	128
	304	52	48	61	58
	305	78	105	55	88
	306	86	26	60	73
	307	85	96	70	62
	308	52	61	96	67
	309	40	68	34	66
	310	198	57	100	83
	311	84	54	79	97
	312	124	55	108	130
	313	47	61	112	21
	314	199	61	41	53
	315	160	61	35	126
	316	118	57	86	105
	317	164	45	73	22
	318	96	50	69	17
	319	75	59	70	108
	320	137	35	53	46
	321	63	70	40	23
	322	42	35	12	94
	323	47	48	50	87
	324	95	44	52	22
	325	115	70	14	47
	326	111	75	34	62
	327	49	15	15	70
	328	68	49	59	62
	329	27	38	83	96
	330	56	14	57	98
	331	24	116	30	72
	332	94	112	34	107
	333	39	24	30	35
	334	149	74	13	86
	335	45	27	13	53
	336	124	221	35	58
	337	179	6	59	70
	338	103	7	58	116
	339	165	117	54	86
	340	172	66	27	111
	341	156	59	44	38
	342	121	62	50	75
	343	152	53	28	28
	344	134	28	9	56
	345	44	21	104	54
	346	57	22	82	65
	347	101	58	116	114
	348	88	39	111	197
	349	88	36	119	196
	350	90	44	131	121
	351	92	39	93	83
	352	70	22	101	147
	353	79	90	72	76
	354	25	67	100	135
	355	46	91	95	91
	356	50	37	97	36
	357	50	116	140	45
	358	62	78	133	99
	359	40	65	78	46
	360	9	73	58	35
	361	71	62	119	77
	362	76	116	125	49
	363	108	97	100	59
	364	71	100	67	50
	365	65	135	146	115
	366	17	129	123	81
	367	139	70	59	80
	368	59	126	45	42
	369	83	81	123	51
	370	62	71	41	63
	371	83	67	62	30
	372	66	94	119	56
	373	63	65	224	64
	374	125	43	38	55
	375	62	119	106	100
	376	51	63	106	52
	377	94	57	88	43
	378	44	97	92	41
	379	61	113	70	115
	380	67	141	42	89
	381	101	104	103	98
	382	54	71	61	114
	383	58	126	98	16
	384	77	163	90	54
	385	81	69	48	120
	386	49	100	59	81
	387	72	106	92	109
	388	102	75	91	65
	389	88	99	105	59
	390	96	124	55	108
	391	79	140	49	68
	392	63	130	58	54
	393	109	92	86	97
	394	56	110	40	77
	395	69	133	50	58
	396	69	38	80	116
	397	110	65	72	78
	398	123	136	55	63
	399	110	146	36	126
	400	81	57	13	118
Trial 3	401	71	91	119	35
	402	115	73	107	95
	403	105	115	96	70
	404	68	92	46	98
	405	81	40	114	85
	406	99	87	93	52
	407	51	34	69	103
	408	116	103	120	39
	409	74	92	70	81
	410	111	114	61	126
	411	55	82	63	93
	412	21	90	10	80
	413	49	102	106	55
	414	86	116	69	56
	415	33	91	67	25
	416	12	123	91	36
	417	64	73	87	22
	418	60	93	57	128
	419	58	97	77	92
	420	59	107	128	69
	421	161	71	108	120
	422	120	91	83	114
	423	64	47	39	48
	424	171	99	43	107
	425	73	124	38	96
	426	48	87	48	88
	427	139	80	46	101
	428	105	71	77	74
	429	64	43	145	87
	430	117	43	20	49
	431	134	94	21	107
	432	68	70	73	150
	433	161	80	43	110
	434	147	61	51	90
	435	50	99	38	85
	436	48	104	74	119
	437	120	131	52	109
	438	113	121	48	50
	439	106	79	84	125
	440	84	73	63	101
	441	57	123	68	50
	442	106	78	77	90
	443	90	40	74	65
	444	83	58	79	89
	445	35	63	103	117
	446	90	113	59	68
	447	54	100	71	93
	448	72	96	60	54
	449	91	100	95	63
	450	57	72	73	48
	451	104	38	63	124
	452	44	187	55	69
	453	51	53	56	105
	454	58	16	72	94
	455	68	64	73	100
	456	58	77	62	39
	457	62	63	99	33
	458	119	103	41	84
	459	53	115	72	48
	460	82	28	68	66
	461	26	62	58	82
	462	66	59	44	87
	463	73	127	108	37
	464	33	70	76	125
	465	27	82	51	78
	466	69	102	92	67
	467	84	79	42	98
	468	85	118	69	114
	469	53	54	70	114
	470	64	124	75	118
	471	83	63	86	112
	472	79	43	62	119
	473	123	82	53	101
	474	43	55	83	90
	475	67	84	53	99
	476	95	77	75	82
	477	71	70	53	82
	478	53	35	119	131
	479	43	56	96	97
	480	72	70	114	75
	481	96	70	57	27
	482	112	89	75	67
	483	40	167	88	129
	484	127	81	62	147
	485	113	72	98	109
	486	110	166	61	99
	487	71	83	71	96
	488	50	38	80	74
	489	114	51	97	78
	490	76	74	68	123
	491	79	61	51	76
	492	22	42	33	90
	493	26	152	87	52
	494	80	99	57	78
	495	70	75	67	81
	496	79	35	57	45
	497	105	58	79	50
	498	44	59	90	86
	499	116	47	61	77
	500	102	51	35	102
	501	108	56	54	135
	502	69	115	69	102
	503	62	142	85	37
	504	60	157	246	79
	505	50	42	51	52
	506	72	43	94	129
	507	72	62	35	74
	508	106	101	80	90
	509	87	57	43	63
	510	30	54	24	87
	511	289	65	60	83
	512	85	48	49	77
	513	76	60	47	122
	514	52	156	97	69
	515	74	154	57	37
	516	102	123	79	103
	517	91	103	65	38
	518	87	104	49	102
	519	84	59	37	126
	520	87	109	69	62
	521	60	65	73	54
	522	58	93	67	80
	523	109	85	85	121
	524	98	100	69	128
	525	74	76	99	71
	526	104	89	71	70
	527	155	99	74	68
	528	44	72	54	126
	529	74	136	18	91
	530	103	139	82	56
	531	113	54	83	43
	532	77	112	107	91
	533	80	82	30	28
	534	61	49	60	84
	535	73	71	95	35
	536	99	66	93	36
	537	69	73	97	30
	538	101	99	55	68
	539	82	51	79	49
	540	90	97	98	40
	541	145	53	85	80
	542	56	93	54	71
	543	56	61	65	77
	544	62	57	57	73
	545	57	48	51	122
	546	66	92	47	79
	547	178	43	105	108
	548	152	82	49	29
	549	85	51	38	76
	550	123	59	74	66
	551	78	49	83	34
	552	84	53	87	33
	553	85	72	79	99
	554	69	46	79	60
	555	65	62	81	81
	556	108	51	12	65
	557	125	58	91	80
	558	118	47	116	75
	559	70	70	117	126
	560	96	54	64	65
	561	118	55	86	102
	562	27	47	131	85
	563	102	57	46	110
	564	112	28	36	47
	565	38	28	43	110
	566	132	29	71	36
	567	32	66	62	60
	568	102	59	61	71
	569	50	54	82	109
	570	134	36	34	67
	571	45	55	93	85
	572	62	59	48	67
	573	60	27	44	84
	574	63	30	96	132
	575	114	78	82	84
	576	117	91	100	48
	577	95	95	73	69
	578	40	42	39	126
	579	75	48	94	95
	580	70	40	66	106
	581	87	52	50	113
	582	99	105	76	97
	583	114	63	50	75
	584	83	110	121	126
	585	82	51	94	89
	586	132	60	56	76
	587	88	42	26	82
	588	89	75	81	86
	589	78	78	69	126
	590	69	53	44	83
	591	87	115	57	79
	592	93	41	23	124
	593	83	72	112	67
	594	107	79	60	61
	595	83	78	74	57
	596	117	84	97	56
	597	62	77	56	111
	598	75	54	64	43
	599	82	53	82	117
	600	43	89	49	75

## Sheet: 7D - RAD51 foci 5d Dox
RAD51 foci in EdU+ cells, Dox 5 days		Cell line: U2OS shPALB2 EV, WT and variants (flag)
n= 200 cells/ trial		IR 4Gy + 3h release
Total n= 600 cells over 3 trials	cell	EV	WT	7Q	7R
Trial 1	1	0	2	0	10			Trial 1
	2	0	5	0	5			Trial 2
	3	0	16	2	16			Trial 3
	4	0	8	2	5
	5	0	18	2	6
	6	0	12	2	13
	7	0	9	20	1
	8	1	13	0	10
	9	0	4	12	20
	10	0	1	17	30
	11	0	4	5	17
	12	1	10	2	7
	13	23	15	21	20
	14	27	9	4	1
	15	23	3	5	18
	16	50	5	0	30
	17	18	48	12	17
	18	14	21	4	31
	19	30	11	9	19
	20	5	53	0	5
	21	3	44	9	1
	22	1	21	0	1
	23	2	34	0	21
	24	7	28	1	27
	25	6	23	6	23
	26	2	9	6	14
	27	8	16	0	12
	28	3	40	0	26
	29	3	43	11	1
	30	2	19	8	20
	31	2	0	1	2
	32	0	13	11	3
	33	0	31	2	8
	34	0	28	1	10
	35	1	37	2	8
	36	0	29	17	10
	37	1	14	29	31
	38	1	4	16	14
	39	0	32	23	8
	40	0	9	9	18
	41	0	51	19	19
	42	0	11	16	33
	43	0	31	38	15
	44	0	26	60	10
	45	0	49	18	13
	46	0	43	13	62
	47	0	39	30	17
	48	0	19	10	10
	49	0	53	4	6
	50	0	16	22	3
	51	0	11	8	0
	52	0	34	33	9
	53	0	25	23	2
	54	1	14	1	3
	55	1	15	30	0
	56	0	20	8	4
	57	0	28	2	7
	58	1	30	26	11
	59	0	14	7	9
	60	0	20	10	25
	61	1	22	4	7
	62	0	10	1	0
	63	0	12	14	0
	64	0	15	1	0
	65	0	9	19	6
	66	0	6	12	16
	67	0	30	3	7
	68	0	35	22	0
	69	0	20	4	4
	70	0	40	0	1
	71	0	35	11	0
	72	0	25	3	4
	73	0	16	0	2
	74	0	18	3	8
	75	0	39	5	8
	76	0	25	9	4
	77	0	10	4	2
	78	0	28	0	7
	79	0	51	1	3
	80	0	13	22	1
	81	0	17	0	3
	82	0	17	3	5
	83	0	17	11	42
	84	1	4	29	4
	85	2	16	16	10
	86	0	24	8	14
	87	0	19	0	18
	88	0	2	4	7
	89	2	5	4	59
	90	0	7	15	32
	91	0	1	13	36
	92	1	1	0	19
	93	1	7	0	0
	94	1	13	1	1
	95	3	7	6	2
	96	4	2	0	0
	97	1	5	3	20
	98	5	5	2	0
	99	8	3	0	1
	100	14	4	7	2
	101	18	3	5	2
	102	11	9	8	0
	103	27	3	0	5
	104	8	4	0	0
	105	10	1	0	1
	106	20	3	1	7
	107	1	11	0	3
	108	0	1	20	21
	109	1	2	0	0
	110	0	26	0	17
	111	0	10	0	0
	112	0	17	0	0
	113	0	28	0	0
	114	0	25	0	9
	115	0	44	0	4
	116	0	17	2	6
	117	0	24	27	1
	118	1	44	0	7
	119	0	34	6	3
	120	1	7	1	3
	121	1	17	1	0
	122	0	3	8	15
	123	1	6	2	17
	124	0	19	3	6
	125	0	8	6	25
	126	0	8	5	11
	127	4	2	3	35
	128	0	9	1	28
	129	0	18	17	34
	130	1	22	17	50
	131	0	10	3	15
	132	3	1	2	17
	133	5	12	3	3
	134	8	5	0	2
	135	4	15	3	28
	136	1	24	0	3
	137	2	15	0	6
	138	8	23	2	9
	139	0	14	2	21
	140	0	18	1	1
	141	0	10	0	29
	142	5	61	0	30
	143	2	29	0	0
	144	4	12	20	40
	145	0	32	2	20
	146	0	8	10	10
	147	1	13	0	5
	148	0	0	0	1
	149	0	7	9	32
	150	0	3	5	53
	151	1	5	5	9
	152	1	5	1	7
	153	0	0	3	5
	154	1	0	2	12
	155	0	1	11	16
	156	19	6	12	9
	157	17	5	9	20
	158	30	2	8	25
	159	39	0	17	1
	160	17	0	10	33
	161	4	0	9	4
	162	22	1	2	1
	163	3	5	30	10
	164	6	0	3	39
	165	32	6	15	33
	166	0	5	9	13
	167	0	24	9	5
	168	0	31	10	0
	169	0	19	11	10
	170	0	30	14	18
	171	0	16	13	28
	172	0	30	6	17
	173	2	3	5	0
	174	0	16	2	18
	175	0	5	3	0
	176	0	1	3	0
	177	6	27	0	0
	178	1	3	0	0
	179	0	7	4	6
	180	2	5	1	3
	181	0	6	17	1
	182	2	8	0	12
	183	0	8	12	10
	184	3	4	9	0
	185	1	38	0	2
	186	5	15	7	0
	187	0	18	11	6
	188	1	12	10	8
	189	0	18	9	16
	190	1	2	1	0
	191	0	1	4	12
	192	5	7	8	0
	193	1	2	5	0
	194	2	10	16	0
	195	2	15	2	8
	196	2	3	14	0
	197	1	3	9	3
	198	0	4	3	0
	199	1	2	25	0
	200	0	3	5	0
Trial 2	201	0	4	22	4
	202	0	1	9	1
	203	0	14	2	0
	204	0	1	4	0
	205	0	13	1	12
	206	0	17	13	0
	207	0	2	1	1
	208	0	19	10	1
	209	0	26	17	0
	210	0	11	0	19
	211	0	1	3	18
	212	1	25	2	16
	213	0	22	0	1
	214	1	12	29	14
	215	0	5	1	0
	216	0	19	0	1
	217	0	7	8	0
	218	3	21	19	2
	219	0	32	0	0
	220	0	35	10	0
	221	0	4	1	15
	222	0	21	0	6
	223	0	0	0	3
	224	0	7	3	12
	225	0	1	0	15
	226	0	0	0	1
	227	0	3	7	1
	228	0	0	1	1
	229	0	2	1	21
	230	0	6	0	9
	231	0	14	6	0
	232	0	0	9	3
	233	0	21	1	3
	234	0	0	1	13
	235	0	14	4	3
	236	0	0	0	4
	237	0	7	0	5
	238	0	2	0	26
	239	0	0	5	1
	240	0	11	1	0
	241	0	12	19	13
	242	0	17	26	3
	243	1	14	0	0
	244	0	0	46	12
	245	0	0	7	23
	246	1	0	3	9
	247	2	22	14	4
	248	1	0	13	5
	249	0	8	4	1
	250	0	5	37	0
	251	0	2	22	3
	252	0	8	15	0
	253	0	12	32	2
	254	0	0	5	0
	255	0	13	4	6
	256	0	0	9	9
	257	1	1	1	8
	258	4	95	6	4
	259	6	0	0	0
	260	0	8	12	3
	261	0	6	10	0
	262	1	3	0	3
	263	0	5	0	0
	264	0	18	1	1
	265	0	16	0	0
	266	1	5	2	18
	267	13	5	0	2
	268	0	17	0	3
	269	0	20	9	0
	270	2	18	5	0
	271	2	33	1	0
	272	1	10	0	4
	273	0	10	0	9
	274	1	9	16	0
	275	0	33	5	0
	276	0	16	13	0
	277	1	8	2	2
	278	3	2	1	4
	279	0	12	4	15
	280	0	10	5	12
	281	1	0	9	13
	282	0	4	0	6
	283	0	14	1	21
	284	0	8	2	13
	285	7	24	6	9
	286	0	29	2	17
	287	3	5	2	6
	288	0	4	0	19
	289	0	37	0	30
	290	1	7	3	34
	291	2	14	2	5
	292	0	12	3	17
	293	9	9	0	8
	294	0	15	5	12
	295	1	42	7	15
	296	1	3	0	12
	297	0	58	0	25
	298	4	3	12	5
	299	9	47	0	28
	300	1	1	2	14
	301	3	8	11	8
	302	9	0	14	9
	303	1	24	2	25
	304	0	3	7	11
	305	7	4	3	5
	306	10	16	5	5
	307	10	16	4	11
	308	2	1	17	0
	309	2	22	1	4
	310	0	16	0	0
	311	4	2	25	0
	312	2	13	12	2
	313	3	35	4	4
	314	2	4	3	0
	315	10	0	2	0
	316	9	1	6	10
	317	4	7	8	5
	318	0	2	9	11
	319	0	37	1	7
	320	0	0	2	0
	321	0	12	12	22
	322	2	2	8	0
	323	7	7	1	1
	324	2	4	0	7
	325	0	23	10	4
	326	0	3	3	4
	327	0	28	1	10
	328	4	4	10	3
	329	2	13	0	0
	330	4	0	18	1
	331	0	2	0	0
	332	4	1	13	16
	333	14	2	5	3
	334	0	1	5	1
	335	2	1	1	0
	336	0	9	18	41
	337	0	8	2	28
	338	1	18	12	2
	339	0	33	12	3
	340	0	10	0	3
	341	0	24	0	0
	342	2	8	0	4
	343	3	13	1	0
	344	0	3	0	17
	345	1	1	1	5
	346	1	9	1	0
	347	0	1	1	10
	348	0	16	3	1
	349	1	16	0	13
	350	1	1	0	16
	351	0	11	2	0
	352	0	21	1	1
	353	1	2	0	4
	354	0	5	0	1
	355	4	29	0	0
	356	0	3	0	0
	357	0	4	0	1
	358	0	2	0	0
	359	0	0	4	0
	360	0	2	1	0
	361	0	0	1	0
	362	0	2	0	8
	363	1	0	0	6
	364	0	5	0	14
	365	1	3	7	0
	366	2	19	9	3
	367	6	0	9	3
	368	0	0	1	4
	369	0	2	5	10
	370	0	18	2	6
	371	2	6	1	6
	372	1	1	16	3
	373	1	19	3	1
	374	7	0	0	0
	375	3	2	0	0
	376	1	9	14	7
	377	1	1	1	3
	378	0	19	2	0
	379	0	3	11	0
	380	0	1	17	3
	381	4	0	0	0
	382	0	2	2	2
	383	1	0	2	13
	384	0	6	5	1
	385	1	18	17	1
	386	1	9	0	4
	387	1	15	16	22
	388	0	24	3	2
	389	1	1	2	0
	390	0	20	4	0
	391	1	0	14	7
	392	2	16	4	2
	393	1	0	19	0
	394	0	2	5	10
	395	0	0	1	2
	396	0	31	10	4
	397	0	13	13	1
	398	0	10	2	1
	399	1	0	13	0
	400	0	1	38	0
Trial 3	401	1	4	5	0
	402	0	22	1	1
	403	0	41	0	28
	404	0	19	1	22
	405	0	14	0	5
	406	0	20	0	0
	407	1	22	12	4
	408	0	1	24	18
	409	0	11	11	9
	410	3	29	16	2
	411	2	0	0	0
	412	0	11	2	17
	413	0	5	1	1
	414	0	12	0	1
	415	5	26	3	13
	416	0	13	0	9
	417	0	10	4	4
	418	0	12	24	14
	419	0	5	0	15
	420	0	11	1	0
	421	0	15	5	14
	422	0	38	0	1
	423	0	1	1	12
	424	0	9	5	15
	425	5	12	0	29
	426	3	11	1	2
	427	2	26	0	0
	428	0	20	4	0
	429	0	29	1	0
	430	0	10	11	0
	431	0	53	1	0
	432	0	14	1	0
	433	40	3	2	0
	434	0	3	20	23
	435	0	26	14	7
	436	0	0	1	0
	437	0	19	9	5
	438	0	25	6	0
	439	0	15	6	5
	440	0	7	0	0
	441	0	16	0	0
	442	0	3	0	2
	443	0	6	11	0
	444	0	1	0	0
	445	1	3	2	0
	446	0	0	8	2
	447	0	1	11	0
	448	0	0	5	0
	449	0	3	9	0
	450	1	0	7	0
	451	0	4	6	3
	452	0	0	0	18
	453	0	2	0	3
	454	0	9	1	1
	455	0	11	0	19
	456	0	26	0	2
	457	0	11	8	2
	458	0	3	16	1
	459	1	2	0	11
	460	1	7	0	35
	461	0	8	1	2
	462	0	1	0	23
	463	0	2	0	31
	464	4	1	0	5
	465	0	2	6	0
	466	3	7	7	28
	467	2	6	0	25
	468	0	18	3	0
	469	1	21	0	24
	470	0	1	0	18
	471	2	4	0	1
	472	0	14	2	12
	473	11	14	27	10
	474	2	7	0	0
	475	1	28	1	37
	476	8	17	0	8
	477	2	8	0	0
	478	2	13	5	0
	479	2	8	2	28
	480	5	0	15	16
	481	2	17	0	6
	482	4	7	9	8
	483	4	0	9	1
	484	6	2	0	1
	485	3	8	19	2
	486	3	6	3	5
	487	7	10	2	4
	488	4	6	0	2
	489	6	0	2	2
	490	1	2	7	2
	491	0	6	0	2
	492	3	0	0	15
	493	1	11	21	17
	494	0	12	0	0
	495	5	18	0	5
	496	1	20	3	4
	497	0	0	0	2
	498	0	16	5	2
	499	1	18	4	0
	500	0	11	0	4
	501	0	32	2	22
	502	1	11	4	1
	503	5	12	0	1
	504	1	6	2	15
	505	0	4	17	1
	506	1	34	1	7
	507	1	3	2	13
	508	2	15	1	17
	509	3	21	2	8
	510	0	29	35	19
	511	2	2	20	18
	512	2	3	0	28
	513	1	15	1	8
	514	7	2	8	0
	515	0	10	0	21
	516	0	21	0	26
	517	0	5	0	9
	518	0	28	7	10
	519	9	2	0	6
	520	2	10	23	3
	521	2	0	4	4
	522	2	19	0	1
	523	3	15	3	36
	524	1	2	7	27
	525	7	2	1	28
	526	4	28	2	8
	527	2	10	1	8
	528	0	2	2	0
	529	4	0	4	9
	530	1	0	15	0
	531	0	22	1	20
	532	2	18	1	3
	533	1	16	2	0
	534	4	4	1	1
	535	0	14	3	0
	536	1	0	0	18
	537	5	0	0	7
	538	2	22	33	5
	539	2	16	2	3
	540	2	28	0	7
	541	3	7	6	7
	542	0	1	1	7
	543	1	43	16	0
	544	6	1	12	0
	545	0	8	21	2
	546	3	10	2	14
	547	4	4	30	1
	548	3	19	27	15
	549	4	31	20	1
	550	2	2	0	2
	551	2	24	20	3
	552	0	3	2	27
	553	0	16	6	29
	554	2	3	16	9
	555	4	2	17	2
	556	8	5	6	1
	557	12	8	5	15
	558	18	8	31	0
	559	4	5	7	0
	560	11	12	7	6
	561	13	22	4	7
	562	28	11	10	0
	563	10	11	0	5
	564	28	12	2	1
	565	20	8	2	0
	566	15	15	0	4
	567	7	33	8	1
	568	5	15	7	54
	569	12	17	10	15
	570	17	19	0	31
	571	33	6	1	32
	572	0	17	0	1
	573	1	35	0	2
	574	0	1	0	1
	575	0	3	0	15
	576	1	5	9	29
	577	0	0	1	16
	578	0	9	0	34
	579	0	1	3	7
	580	5	1	0	13
	581	0	0	0	0
	582	0	0	1	12
	583	0	2	1	4
	584	1	1	1	2
	585	0	8	2	0
	586	0	2	0	0
	587	0	1	0	0
	588	0	8	26	4
	589	0	12	4	0
	590	0	13	8	0
	591	0	14	24	2
	592	0	16	4	8
	593	0	1	0	0
	594	0	16	1	17
	595	0	3	2	0
	596	0	1	0	1
	597	1	0	0	2
	598	0	18	2	8
	599	0	0	0	12
	600	0	11	1	14

## Sheet: 7E - yH2AX foci 5d Dox
yH2AX foci in EdU+ cells, Dox 5 days		Cell line: U2OS shPALB2 EV, WT and variants (flag)
n= 200 cells/ trial		IR 4Gy + 3h release
Total n= 600 cells over 3 trials	cell	EV	WT	7Q	7R
Trial 1	1	95	137	68	94			Trial 1
	2	49	68	96	100			Trial 2
	3	49	46	58	73			Trial 3
	4	65	49	126	53
	5	73	50	57	69
	6	105	77	110	34
	7	102	93	74	51
	8	117	66	80	10
	9	63	126	127	95
	10	114	54	98	81
	11	85	112	74	108
	12	56	106	106	86
	13	97	78	115	61
	14	68	93	57	60
	15	87	72	100	102
	16	70	54	95	121
	17	98	87	72	107
	18	78	62	81	103
	19	98	88	71	92
	20	123	60	62	80
	21	123	72	78	50
	22	24	78	59	56
	23	61	103	72	75
	24	31	115	103	95
	25	67	71	60	77
	26	69	58	55	107
	27	75	64	32	70
	28	70	103	35	176
	29	81	114	78	85
	30	112	92	106	93
	31	55	46	72	77
	32	60	67	79	107
	33	67	84	19	85
	34	57	71	57	90
	35	70	95	45	25
	36	89	107	96	94
	37	67	72	101	81
	38	127	78	65	79
	39	172	111	55	84
	40	119	96	54	64
	41	90	74	48	84
	42	100	63	64	120
	43	98	92	98	58
	44	56	74	113	41
	45	98	67	71	120
	46	70	62	57	39
	47	80	110	76	105
	48	97	56	64	71
	49	94	92	62	76
	50	60	65	79	129
	51	51	131	57	96
	52	64	105	74	89
	53	66	45	73	84
	54	119	75	71	68
	55	71	60	82	49
	56	97	105	82	73
	57	103	74	63	116
	58	80	106	67	190
	59	92	69	101	186
	60	85	65	88	212
	61	120	34	66	187
	62	93	44	112	35
	63	28	89	88	26
	64	68	113	67	58
	65	35	61	90	79
	66	45	84	124	63
	67	107	53	121	99
	68	26	94	91	28
	69	117	97	95	32
	70	89	64	94	125
	71	89	61	157	71
	72	81	81	92	44
	73	58	62	112	54
	74	118	125	173	130
	75	66	71	60	96
	76	77	72	65	73
	77	136	59	71	60
	78	134	50	85	110
	79	97	101	95	68
	80	96	69	88	64
	81	125	105	40	72
	82	80	103	31	12
	83	41	108	67	141
	84	63	95	145	4
	85	54	53	79	46
	86	62	76	36	117
	87	86	68	59	33
	88	116	118	38	43
	89	105	102	61	106
	90	34	64	52	91
	91	91	167	65	70
	92	66	72	67	102
	93	42	70	111	74
	94	57	73	103	122
	95	65	65	93	105
	96	77	72	67	92
	97	146	56	97	110
	98	89	73	114	102
	99	103	94	118	83
	100	118	89	68	81
	101	107	25	103	98
	102	43	73	85	66
	103	56	83	91	119
	104	52	70	130	67
	105	81	49	55	87
	106	114	77	73	50
	107	78	58	77	121
	108	67	22	81	96
	109	102	46	89	73
	110	143	105	104	100
	111	103	29	48	115
	112	85	61	100	112
	113	111	45	92	103
	114	82	41	63	111
	115	104	46	54	107
	116	132	92	79	79
	117	88	43	146	88
	118	67	78	55	124
	119	87	76	113	59
	120	152	37	44	40
	121	122	81	51	47
	122	70	75	135	56
	123	109	59	66	67
	124	64	64	63	104
	125	98	54	47	91
	126	152	92	44	100
	127	213	41	67	93
	128	189	34	62	83
	129	80	20	53	96
	130	136	43	53	146
	131	120	68	57	71
	132	98	61	43	88
	133	106	83	75	59
	134	104	41	51	26
	135	153	20	59	46
	136	51	30	37	36
	137	107	44	55	99
	138	78	46	87	96
	139	88	65	57	47
	140	82	91	47	40
	141	103	81	45	107
	142	107	48	24	115
	143	61	94	67	55
	144	50	67	92	102
	145	72	59	40	68
	146	82	72	97	72
	147	115	57	43	89
	148	67	43	84	56
	149	140	97	111	124
	150	61	79	37	118
	151	99	77	84	87
	152	127	93	50	139
	153	49	75	85	149
	154	63	78	68	78
	155	102	40	50	117
	156	131	32	108	109
	157	78	42	83	79
	158	82	34	51	68
	159	108	36	64	65
	160	95	94	71	62
	161	124	100	63	121
	162	70	48	110	109
	163	117	51	88	82
	164	71	59	33	59
	165	127	43	79	66
	166	80	77	47	98
	167	96	123	54	74
	168	53	133	60	112
	169	127	77	104	43
	170	125	78	48	54
	171	113	100	76	88
	172	94	95	44	60
	173	101	48	37	91
	174	141	78	49	56
	175	94	50	89	41
	176	89	90	115	95
	177	77	148	116	55
	178	58	61	58	61
	179	192	8	45	162
	180	142	73	114	89
	181	176	19	84	127
	182	77	51	123	122
	183	66	61	83	141
	184	111	53	86	26
	185	86	19	75	70
	186	105	62	91	60
	187	55	59	94	90
	188	50	54	69	29
	189	121	84	64	56
	190	52	87	47	50
	191	59	65	53	99
	192	127	69	67	70
	193	99	116	77	39
	194	93	16	85	43
	195	87	87	88	141
	196	39	74	86	42
	197	148	157	70	47
	198	108	175	70	47
	199	104	79	72	137
	200	120	79	48	106
Trial 2	201	89	109	102	106
	202	164	114	64	75
	203	119	91	75	135
	204	100	68	68	75
	205	108	134	136	115
	206	137	60	93	76
	207	131	71	121	88
	208	105	85	98	96
	209	93	79	81	89
	210	92	116	129	97
	211	26	70	98	85
	212	100	78	56	69
	213	110	89	167	77
	214	126	118	121	75
	215	107	115	127	67
	216	198	182	120	43
	217	65	107	118	119
	218	65	127	94	126
	219	110	96	56	56
	220	97	108	83	40
	221	100	89	138	104
	222	56	88	93	71
	223	106	98	130	64
	224	47	79	59	102
	225	79	92	91	99
	226	55	96	61	47
	227	120	87	79	118
	228	83	77	83	93
	229	91	66	62	103
	230	76	77	74	99
	231	103	61	67	79
	232	39	133	77	118
	233	97	69	108	50
	234	148	73	125	118
	235	116	59	69	74
	236	248	92	138	139
	237	81	61	116	78
	238	91	115	76	90
	239	134	141	121	79
	240	110	61	98	65
	241	144	63	117	128
	242	74	82	50	123
	243	76	68	109	110
	244	74	116	111	75
	245	96	124	83	96
	246	55	43	91	132
	247	27	85	134	155
	248	69	74	70	114
	249	107	53	66	37
	250	81	56	75	98
	251	112	43	108	127
	252	135	61	111	40
	253	128	80	80	70
	254	58	96	49	97
	255	91	39	58	83
	256	45	50	132	78
	257	88	66	115	57
	258	42	146	73	66
	259	112	72	108	54
	260	100	77	65	72
	261	83	70	60	99
	262	92	51	173	71
	263	36	60	64	82
	264	96	64	72	62
	265	71	38	62	75
	266	75	67	49	37
	267	72	63	98	65
	268	104	98	106	75
	269	120	42	113	84
	270	138	129	81	89
	271	88	43	48	90
	272	48	47	112	47
	273	49	54	107	69
	274	128	96	69	51
	275	142	68	86	95
	276	112	84	64	98
	277	192	71	103	75
	278	131	93	95	83
	279	98	54	74	53
	280	275	54	97	80
	281	116	41	59	93
	282	71	80	219	95
	283	92	55	100	84
	284	61	69	103	89
	285	57	56	62	126
	286	97	58	59	66
	287	77	43	108	45
	288	49	36	110	75
	289	127	71	62	49
	290	40	40	81	166
	291	117	49	82	45
	292	45	36	56	76
	293	53	37	63	67
	294	107	54	70	119
	295	95	42	86	84
	296	133	55	108	48
	297	68	89	103	105
	298	76	90	65	110
	299	87	98	86	186
	300	121	54	70	60
	301	108	41	63	44
	302	104	25	71	84
	303	91	64	89	101
	304	75	68	67	52
	305	39	54	81	132
	306	106	66	93	115
	307	107	72	86	79
	308	123	53	73	135
	309	66	80	145	107
	310	78	35	111	56
	311	105	38	81	109
	312	73	100	65	49
	313	237	83	79	70
	314	106	58	72	88
	315	89	17	66	90
	316	98	39	58	67
	317	74	112	60	88
	318	79	82	82	159
	319	48	100	58	83
	320	75	60	84	26
	321	86	94	54	68
	322	80	48	105	97
	323	91	86	54	110
	324	84	67	110	72
	325	90	109	76	106
	326	114	104	46	116
	327	62	57	64	69
	328	74	86	77	129
	329	102	104	88	61
	330	41	52	80	102
	331	52	44	71	40
	332	79	37	114	67
	333	130	84	75	53
	334	73	38	70	31
	335	169	116	75	82
	336	91	69	81	93
	337	107	108	76	74
	338	115	69	101	94
	339	174	86	63	61
	340	118	90	75	95
	341	81	71	75	126
	342	139	120	42	48
	343	75	121	63	33
	344	146	69	74	97
	345	88	114	103	68
	346	71	75	10	121
	347	126	85	41	73
	348	61	84	129	74
	349	153	68	82	34
	350	121	88	98	51
	351	100	56	107	59
	352	120	57	73	102
	353	180	68	27	119
	354	108	47	76	25
	355	117	66	59	70
	356	54	63	49	72
	357	79	81	83	23
	358	72	38	77	115
	359	124	22	88	33
	360	99	10	74	60
	361	119	28	50	36
	362	123	87	66	43
	363	138	36	86	45
	364	110	29	63	130
	365	79	48	90	48
	366	130	57	67	51
	367	33	65	68	24
	368	106	25	95	131
	369	80	52	69	55
	370	87	38	52	90
	371	44	51	92	31
	372	113	47	62	45
	373	74	37	88	111
	374	230	69	82	45
	375	92	41	84	40
	376	58	46	90	34
	377	59	58	33	39
	378	65	55	123	41
	379	117	39	87	48
	380	156	61	84	58
	381	73	79	95	80
	382	70	54	70	112
	383	68	52	76	62
	384	64	76	35	34
	385	92	50	81	114
	386	70	55	71	69
	387	97	57	55	116
	388	118	45	51	72
	389	42	44	131	54
	390	144	48	132	78
	391	100	51	102	92
	392	146	130	83	61
	393	109	60	75	43
	394	74	76	95	71
	395	84	80	134	42
	396	88	120	76	94
	397	116	81	115	30
	398	133	24	95	94
	399	146	52	89	82
	400	47	55	135	81
Trial 3	401	72	86	89	122
	402	119	51	44	59
	403	50	72	70	70
	404	108	79	52	54
	405	102	111	89	79
	406	239	135	15	32
	407	100	68	79	72
	408	71	71	65	72
	409	69	84	85	81
	410	46	70	117	56
	411	40	77	84	107
	412	42	91	61	78
	413	64	89	106	61
	414	76	72	122	91
	415	75	81	91	89
	416	97	97	40	94
	417	78	71	39	96
	418	85	71	94	58
	419	113	71	110	32
	420	113	82	108	76
	421	122	57	118	83
	422	104	134	90	64
	423	132	77	90	126
	424	91	36	92	51
	425	72	61	75	49
	426	86	79	109	95
	427	192	57	67	98
	428	78	77	104	95
	429	59	110	132	124
	430	100	59	52	77
	431	107	86	64	79
	432	83	88	86	56
	433	111	94	113	57
	434	126	89	94	91
	435	132	101	95	77
	436	68	70	87	85
	437	45	93	97	95
	438	56	57	60	132
	439	108	71	50	182
	440	87	134	61	61
	441	108	108	55	42
	442	89	106	82	273
	443	90	112	94	99
	444	92	93	85	64
	445	100	105	130	90
	446	77	112	71	65
	447	67	157	89	81
	448	63	110	69	48
	449	63	104	78	78
	450	86	128	56	42
	451	57	76	60	131
	452	98	82	83	81
	453	175	121	35	68
	454	81	107	145	136
	455	117	86	44	81
	456	89	96	84	36
	457	86	86	76	93
	458	90	104	95	116
	459	62	111	111	84
	460	89	66	108	92
	461	74	63	64	103
	462	123	45	84	123
	463	90	40	126	84
	464	116	58	111	81
	465	130	95	114	108
	466	85	15	91	46
	467	163	81	73	105
	468	129	138	67	65
	469	113	56	118	101
	470	97	47	44	111
	471	93	78	142	45
	472	46	29	126	112
	473	59	31	80	163
	474	104	25	178	161
	475	110	49	65	95
	476	106	70	107	82
	477	122	180	88	71
	478	103	102	81	46
	479	104	95	65	96
	480	89	133	81	113
	481	106	145	94	80
	482	106	118	87	45
	483	66	72	69	39
	484	71	75	46	47
	485	147	96	59	81
	486	95	52	90	85
	487	165	65	88	53
	488	165	50	130	77
	489	253	160	57	112
	490	85	58	76	159
	491	63	103	99	89
	492	70	103	123	138
	493	97	94	80	73
	494	106	110	125	111
	495	88	123	66	68
	496	120	40	51	53
	497	115	96	67	124
	498	113	84	92	107
	499	117	63	123	70
	500	131	152	96	83
	501	91	67	111	56
	502	43	82	76	81
	503	68	53	127	71
	504	147	65	104	94
	505	77	71	44	44
	506	41	103	104	102
	507	65	51	91	85
	508	125	50	85	118
	509	129	56	148	89
	510	52	69	101	32
	511	94	64	97	101
	512	114	75	87	86
	513	61	28	43	49
	514	70	70	196	78
	515	61	19	125	67
	516	45	64	82	91
	517	69	65	74	15
	518	70	67	78	31
	519	74	67	84	92
	520	68	51	93	86
	521	168	80	80	67
	522	119	94	46	51
	523	89	128	48	92
	524	83	56	81	207
	525	90	36	86	109
	526	107	69	53	73
	527	164	79	90	50
	528	132	82	83	35
	529	234	73	56	116
	530	96	118	78	209
	531	90	72	44	62
	532	77	100	53	118
	533	65	74	21	64
	534	58	58	50	90
	535	66	47	59	72
	536	79	65	54	39
	537	54	78	117	44
	538	64	124	37	70
	539	82	56	36	76
	540	104	77	27	60
	541	68	82	126	78
	542	95	73	27	91
	543	121	76	103	102
	544	71	71	87	105
	545	57	88	65	104
	546	45	54	55	115
	547	92	112	85	80
	548	112	228	73	108
	549	66	201	112	129
	550	58	116	86	65
	551	45	66	80	94
	552	69	145	24	90
	553	39	118	71	95
	554	98	51	74	44
	555	82	94	87	92
	556	131	90	96	102
	557	113	105	96	78
	558	82	57	99	75
	559	143	70	111	79
	560	141	107	32	44
	561	129	96	88	85
	562	116	65	52	39
	563	148	4	88	83
	564	125	84	51	73
	565	84	61	79	60
	566	83	133	87	57
	567	142	69	88	37
	568	103	63	86	110
	569	88	47	41	84
	570	88	67	97	91
	571	171	48	62	82
	572	131	87	97	56
	573	98	70	141	47
	574	99	56	87	74
	575	110	169	46	150
	576	78	54	143	63
	577	181	73	69	61
	578	102	30	51	116
	579	97	74	88	78
	580	109	78	63	73
	581	136	86	109	70
	582	99	73	115	96
	583	105	96	89	147
	584	63	65	116	117
	585	118	1	60	117
	586	141	70	112	89
	587	117	77	86	20
	588	92	58	135	106
	589	118	90	73	102
	590	122	72	43	86
	591	90	70	119	95
	592	87	50	105	31
	593	63	119	103	67
	594	136	55	87	71
	595	64	35	49	48
	596	55	22	156	57
	597	136	54	134	87
	598	144	94	105	61
	599	18	57	68	82
	600	56	90	121	88
