# Supplementary material for: KAT2-mediated acetylation switches the mode of PALB2 chromatin association to safeguard genome integrity
Source: eLife. 2022 Oct 21;11:e57736. doi: 10.7554/eLife.57736 (PMC9671498; doi:10.7554/eLife.57736)
Supplement: Figure 8—source data 1. [file elife-57736-fig8-data1.xlsx]

## Sheet: 8B - RAD51 foci 4d Dox
RAD51 foci in EdU+ cells, Dox 4 days		Cell line: U2OS shPALB2 EV, WT and variants (flag)
n= 200 cells/ trial		UNTREATED
Total n= 600 cells over 3 trials	cell	EV	WT	7Q	7R
Trial 1	1	1	1	0	1			Trial 1
	2	2	2	0	7			Trial 2
	3	2	1	1	1			Trial 3
	4	0	2	0	0
	5	1	4	0	1
	6	0	1	0	3
	7	0	1	0	1
	8	0	9	1	0
	9	0	1	1	3
	10	0	3	1	1
	11	0	17	0	1
	12	0	13	1	4
	13	0	3	2	2
	14	1	2	0	0
	15	0	1	5	4
	16	0	10	2	0
	17	0	2	1	0
	18	0	0	0	2
	19	0	2	4	2
	20	0	0	0	1
	21	0	0	0	0
	22	0	2	2	3
	23	2	7	0	1
	24	0	2	2	0
	25	1	1	0	4
	26	2	1	1	4
	27	1	2	0	2
	28	0	2	5	1
	29	0	3	4	0
	30	1	3	0	5
	31	1	2	0	4
	32	2	0	0	5
	33	1	3	0	0
	34	0	6	4	1
	35	1	3	0	0
	36	0	6	0	0
	37	5	6	0	1
	38	2	9	4	3
	39	1	6	0	0
	40	3	5	1	0
	41	2	6	0	3
	42	2	0	0	4
	43	0	6	0	2
	44	1	3	3	3
	45	3	0	0	0
	46	0	0	0	1
	47	0	0	0	1
	48	0	0	1	1
	49	0	5	0	0
	50	2	3	0	3
	51	2	2	0	0
	52	2	4	0	0
	53	1	2	1	0
	54	0	0	0	0
	55	1	9	0	1
	56	0	3	0	2
	57	0	9	5	0
	58	0	1	1	11
	59	0	1	0	2
	60	1	9	0	2
	61	0	4	0	1
	62	3	4	0	2
	63	0	2	1	6
	64	3	1	5	2
	65	1	1	0	4
	66	0	3	1	1
	67	2	0	0	14
	68	0	4	1	9
	69	0	0	1	9
	70	4	1	0	2
	71	8	1	8	13
	72	0	3	1	7
	73	0	4	9	0
	74	1	11	7	5
	75	4	5	1	0
	76	0	14	0	0
	77	2	15	0	0
	78	2	2	3	0
	79	3	3	6	0
	80	2	4	4	0
	81	0	8	4	3
	82	2	12	1	0
	83	0	9	0	1
	84	0	15	0	3
	85	1	21	0	0
	86	0	3	0	2
	87	0	18	0	6
	88	5	8	0	0
	89	0	1	0	0
	90	0	10	3	0
	91	0	3	0	0
	92	0	11	0	1
	93	0	23	2	2
	94	0	11	1	5
	95	0	22	0	7
	96	0	9	1	2
	97	0	6	2	5
	98	0	10	1	2
	99	0	5	0	0
	100	1	2	6	16
	101	0	10	2	16
	102	0	7	4	0
	103	0	7	2	11
	104	0	0	0	1
	105	0	1	0	0
	106	0	1	6	1
	107	0	6	1	0
	108	0	0	4	1
	109	0	3	2	0
	110	0	0	6	0
	111	0	1	3	9
	112	0	5	0	0
	113	0	5	1	3
	114	0	5	0	4
	115	0	3	0	5
	116	0	3	1	1
	117	0	4	0	6
	118	0	1	0	0
	119	0	0	1	2
	120	0	4	4	2
	121	0	0	2	1
	122	0	1	0	2
	123	0	0	0	0
	124	0	3	2	1
	125	1	0	3	2
	126	0	5	8	5
	127	0	0	1	0
	128	0	0	0	0
	129	1	0	0	0
	130	0	1	0	0
	131	0	0	0	2
	132	1	0	0	3
	133	1	0	0	1
	134	1	0	3	0
	135	0	0	0	3
	136	0	0	1	0
	137	0	4	0	0
	138	1	1	9	1
	139	4	3	1	0
	140	1	1	1	1
	141	2	0	3	0
	142	0	3	2	0
	143	0	1	10	1
	144	0	8	4	0
	145	0	2	1	0
	146	0	0	4	5
	147	0	0	5	0
	148	0	3	0	1
	149	0	3	0	1
	150	0	1	0	0
	151	0	0	2	0
	152	0	1	6	6
	153	0	2	12	0
	154	0	0	3	0
	155	0	8	4	1
	156	0	2	5	0
	157	0	1	2	2
	158	0	0	1	0
	159	0	5	0	0
	160	0	1	0	1
	161	0	0	0	0
	162	0	0	0	4
	163	0	1	0	4
	164	0	0	2	2
	165	0	3	4	0
	166	0	3	0	0
	167	0	2	5	0
	168	3	0	2	0
	169	4	1	2	0
	170	0	0	3	0
	171	0	0	0	2
	172	0	7	0	0
	173	0	9	1	0
	174	0	4	0	0
	175	6	12	1	3
	176	0	18	5	2
	177	0	1	0	0
	178	0	5	0	0
	179	5	2	0	1
	180	0	9	1	0
	181	0	5	0	2
	182	0	2	3	0
	183	0	2	0	0
	184	0	2	2	3
	185	0	5	0	0
	186	9	6	5	0
	187	0	0	2	0
	188	3	1	3	0
	189	5	4	10	2
	190	0	10	2	0
	191	0	5	1	2
	192	0	0	14	0
	193	0	5	10	0
	194	2	0	1	0
	195	0	11	2	0
	196	0	1	0	4
	197	1	2	1	2
	198	0	1	0	0
	199	1	8	4	1
	200	0	0	2	0
Trial 2	201	0	3	2	13
	202	0	27	1	0
	203	0	13	0	0
	204	0	8	0	6
	205	0	5	1	7
	206	0	2	1	0
	207	0	6	2	0
	208	0	1	0	0
	209	0	5	0	2
	210	0	19	0	7
	211	0	1	0	1
	212	0	3	0	0
	213	0	9	0	6
	214	0	0	2	9
	215	0	3	0	0
	216	0	3	0	3
	217	0	11	0	31
	218	0	13	0	1
	219	0	3	12	1
	220	1	4	1	14
	221	0	2	0	19
	222	0	5	2	5
	223	0	5	1	2
	224	0	2	0	7
	225	1	2	4	0
	226	2	1	1	4
	227	1	0	0	0
	228	0	0	2	0
	229	0	2	2	0
	230	0	1	0	2
	231	0	1	3	9
	232	0	7	0	1
	233	0	1	0	2
	234	1	8	0	2
	235	1	0	0	13
	236	0	4	0	1
	237	1	10	0	12
	238	2	3	0	3
	239	1	1	3	6
	240	1	1	1	1
	241	0	10	4	0
	242	0	3	1	0
	243	0	2	6	0
	244	0	4	8	1
	245	0	1	8	8
	246	0	6	0	0
	247	2	0	0	0
	248	0	6	1	0
	249	0	3	1	0
	250	0	1	2	1
	251	0	8	0	2
	252	0	7	1	0
	253	0	5	0	0
	254	0	1	0	0
	255	0	2	7	2
	256	1	4	12	2
	257	3	5	1	0
	258	0	7	17	0
	259	0	3	4	0
	260	0	4	4	0
	261	0	6	5	3
	262	0	0	3	0
	263	0	1	2	0
	264	0	9	0	1
	265	0	0	11	0
	266	0	2	2	1
	267	0	5	0	4
	268	0	5	0	0
	269	0	0	1	11
	270	0	0	0	1
	271	0	4	1	1
	272	0	5	0	6
	273	0	0	3	9
	274	0	0	1	1
	275	0	3	0	2
	276	0	8	2	0
	277	0	10	0	4
	278	0	0	0	13
	279	0	0	4	1
	280	0	2	0	0
	281	0	9	0	0
	282	0	11	0	0
	283	0	2	1	4
	284	0	6	4	0
	285	0	3	2	0
	286	2	10	0	1
	287	2	1	0	5
	288	6	2	0	0
	289	2	8	2	11
	290	15	5	3	28
	291	2	0	3	3
	292	6	1	0	5
	293	2	5	9	5
	294	0	6	1	5
	295	0	7	3	18
	296	0	10	2	16
	297	0	5	2	8
	298	11	5	0	3
	299	0	1	2	0
	300	4	4	1	0
	301	4	1	1	1
	302	1	6	2	4
	303	0	1	1	0
	304	0	3	0	0
	305	0	0	0	0
	306	0	4	2	0
	307	0	2	3	2
	308	1	15	1	2
	309	1	1	0	3
	310	1	0	4	1
	311	0	9	0	0
	312	0	3	4	0
	313	0	9	0	0
	314	0	1	2	0
	315	0	0	2	0
	316	0	4	4	0
	317	0	2	6	5
	318	0	2	1	0
	319	0	2	4	0
	320	0	5	1	4
	321	0	7	7	0
	322	0	5	6	0
	323	1	0	0	0
	324	0	4	1	0
	325	4	0	1	0
	326	0	13	0	4
	327	0	2	1	0
	328	1	3	13	0
	329	1	7	2	1
	330	1	0	1	4
	331	1	1	3	0
	332	0	0	3	2
	333	0	0	0	2
	334	0	3	3	2
	335	1	2	4	1
	336	0	2	6	0
	337	1	1	11	1
	338	0	4	7	4
	339	0	2	1	0
	340	1	5	1	1
	341	0	5	2	7
	342	0	4	0	1
	343	2	6	8	0
	344	0	1	0	4
	345	0	0	7	14
	346	2	0	0	2
	347	0	9	2	8
	348	0	34	0	9
	349	0	5	0	5
	350	0	0	3	5
	351	0	3	1	8
	352	0	3	6	2
	353	0	2	1	1
	354	0	0	1	0
	355	0	4	3	0
	356	0	1	9	2
	357	1	11	3	2
	358	0	0	0	2
	359	1	0	2	12
	360	1	5	0	2
	361	0	0	1	1
	362	0	0	0	0
	363	0	6	4	0
	364	0	0	0	1
	365	0	0	0	0
	366	0	0	2	1
	367	0	0	0	0
	368	0	0	0	2
	369	0	0	0	2
	370	0	5	1	3
	371	0	21	0	2
	372	0	6	0	1
	373	0	3	0	8
	374	0	1	0	0
	375	0	3	2	0
	376	0	0	1	0
	377	0	1	1	0
	378	0	0	0	0
	379	0	0	2	1
	380	0	1	2	2
	381	1	3	3	1
	382	0	1	0	1
	383	0	4	0	0
	384	0	6	3	0
	385	0	1	0	0
	386	0	8	2	4
	387	0	7	1	0
	388	0	2	0	6
	389	0	5	1	0
	390	0	1	1	0
	391	0	0	6	0
	392	1	1	3	0
	393	0	0	2	4
	394	0	0	7	1
	395	1	2	0	7
	396	0	6	0	9
	397	2	8	7	3
	398	0	0	1	8
	399	0	0	0	2
	400	0	0	0	0
Trial 3	401	0	1	2	0
	402	0	6	1	5
	403	0	4	2	0
	404	0	2	2	0
	405	0	0	9	2
	406	0	5	4	0
	407	0	11	1	1
	408	0	3	1	0
	409	0	3	2	1
	410	0	0	6	1
	411	0	7	5	1
	412	0	5	1	10
	413	0	1	1	0
	414	0	1	0	0
	415	0	6	5	1
	416	0	8	7	2
	417	0	0	0	0
	418	0	8	0	6
	419	0	2	1	2
	420	3	1	0	6
	421	1	0	3	0
	422	2	6	0	3
	423	0	0	4	0
	424	11	12	0	0
	425	16	6	3	13
	426	1	0	0	1
	427	0	10	0	0
	428	0	7	4	0
	429	0	11	0	0
	430	1	5	1	0
	431	2	4	0	1
	432	1	4	0	2
	433	0	3	2	10
	434	1	9	7	4
	435	3	9	1	15
	436	0	10	5	10
	437	0	1	0	9
	438	0	0	0	4
	439	0	7	0	4
	440	0	8	1	1
	441	0	8	0	3
	442	0	18	0	5
	443	0	0	0	9
	444	0	1	0	3
	445	0	0	0	0
	446	0	5	0	3
	447	0	1	0	10
	448	0	3	2	0
	449	0	4	3	3
	450	3	4	9	0
	451	2	4	1	0
	452	2	2	10	6
	453	6	0	4	3
	454	2	0	7	1
	455	0	17	2	3
	456	0	7	12	0
	457	0	7	5	0
	458	1	4	11	5
	459	3	0	10	3
	460	3	0	4	0
	461	2	10	2	1
	462	1	5	7	3
	463	6	3	7	4
	464	9	2	9	6
	465	27	5	14	1
	466	2	2	1	6
	467	1	8	0	3
	468	0	0	4	1
	469	0	7	1	0
	470	1	1	1	6
	471	0	2	1	6
	472	0	2	1	2
	473	1	3	11	1
	474	0	0	0	4
	475	0	0	4	2
	476	4	2	1	0
	477	0	0	0	0
	478	0	0	6	7
	479	1	2	8	0
	480	1	0	1	0
	481	2	0	5	2
	482	0	0	4	0
	483	0	2	3	4
	484	0	2	2	0
	485	1	0	1	2
	486	1	0	0	4
	487	1	0	1	2
	488	1	0	0	6
	489	11	0	1	0
	490	1	1	2	5
	491	1	4	0	0
	492	0	1	0	1
	493	0	4	0	0
	494	3	2	0	0
	495	0	0	6	0
	496	1	7	1	0
	497	0	1	7	1
	498	0	0	0	0
	499	1	0	1	2
	500	0	0	1	0
	501	1	0	3	1
	502	0	0	1	0
	503	1	1	2	1
	504	0	1	0	0
	505	0	2	3	0
	506	2	0	0	2
	507	0	1	0	0
	508	0	4	6	5
	509	0	0	1	4
	510	1	4	0	1
	511	0	2	2	1
	512	2	1	0	3
	513	0	0	1	1
	514	1	3	4	4
	515	3	6	0	15
	516	0	9	0	1
	517	0	4	0	10
	518	0	10	0	10
	519	0	4	0	20
	520	0	4	0	0
	521	1	5	0	6
	522	1	3	2	2
	523	0	0	0	2
	524	5	2	0	10
	525	1	7	1	0
	526	3	1	2	7
	527	10	3	2	4
	528	5	7	1	16
	529	0	2	1	0
	530	5	11	7	1
	531	4	5	12	3
	532	1	9	3	0
	533	4	2	2	0
	534	3	4	2	12
	535	6	3	2	0
	536	2	3	2	6
	537	2	1	5	3
	538	9	5	1	0
	539	4	5	3	1
	540	1	4	0	0
	541	4	6	0	1
	542	1	12	0	9
	543	7	10	0	1
	544	3	2	0	0
	545	3	0	1	0
	546	0	4	2	5
	547	0	5	7	4
	548	0	8	0	1
	549	0	1	5	2
	550	0	1	4	0
	551	1	2	0	5
	552	0	7	1	0
	553	0	0	0	0
	554	0	18	6	1
	555	0	5	2	1
	556	0	5	3	0
	557	0	1	13	0
	558	0	9	3	2
	559	0	5	3	1
	560	0	3	0	4
	561	0	1	1	7
	562	0	4	1	3
	563	0	2	0	0
	564	0	0	1	7
	565	0	2	7	0
	566	0	4	1	3
	567	0	5	0	0
	568	0	5	1	0
	569	0	7	1	1
	570	0	1	1	1
	571	0	7	2	0
	572	0	1	2	0
	573	0	6	1	0
	574	0	0	0	0
	575	0	9	0	0
	576	0	7	0	1
	577	0	1	4	0
	578	0	5	2	0
	579	0	1	1	0
	580	0	1	1	0
	581	0	13	0	1
	582	1	6	0	0
	583	0	1	0	5
	584	0	2	1	3
	585	0	4	0	1
	586	0	0	0	0
	587	0	3	0	1
	588	0	6	0	5
	589	0	0	0	5
	590	0	2	3	1
	591	1	1	1	0
	592	0	0	5	1
	593	0	0	2	1
	594	0	4	2	0
	595	0	3	1	6
	596	0	0	4	1
	597	1	7	1	4
	598	0	0	1	2
	599	0	2	0	0
	600	0	3	0	1

## Sheet: 8C - yH2AX foci 4d Dox
yH2AX foci in EdU+ cells, Dox 4 days		Cell line: U2OS shPALB2 EV, WT and variants (flag)
n= 200 cells/ trial		UNTREATED
Total n= 600 cells over 3 trials	cell	EV	WT	7Q	7R
Trial 1	1	24	4	0	15			Trial 1
	2	16	4	1	19			Trial 2
	3	19	2	17	5			Trial 3
	4	12	3	7	6
	5	2	10	1	8
	6	19	6	0	41
	7	15	8	0	0
	8	27	7	19	6
	9	11	2	49	7
	10	9	2	20	21
	11	9	14	8	3
	12	15	6	13	35
	13	2	6	8	8
	14	10	9	19	0
	15	1	3	41	19
	16	16	1	22	15
	17	3	7	15	2
	18	0	0	9	53
	19	37	6	49	41
	20	21	6	2	5
	21	18	12	33	8
	22	28	3	11	33
	23	28	7	4	14
	24	1	3	11	8
	25	28	16	2	11
	26	20	9	38	14
	27	23	23	14	6
	28	3	2	13	6
	29	43	21	15	7
	30	2	6	7	10
	31	7	6	85	26
	32	21	7	24	19
	33	6	6	5	11
	34	2	19	52	44
	35	5	3	6	7
	36	7	7	2	16
	37	5	13	1	6
	38	17	8	21	8
	39	2	12	8	15
	40	2	6	33	5
	41	27	5	37	16
	42	20	7	2	46
	43	24	6	16	4
	44	0	5	27	23
	45	63	1	53	45
	46	19	2	4	4
	47	16	1	1	8
	48	12	20	23	2
	49	62	1	9	3
	50	16	0	0	6
	51	29	1	11	4
	52	35	3	43	18
	53	31	6	35	24
	54	14	3	34	2
	55	15	13	19	1
	56	22	2	57	17
	57	20	26	49	35
	58	3	15	16	28
	59	24	0	3	24
	60	16	21	13	40
	61	16	16	30	21
	62	18	17	16	27
	63	2	0	35	6
	64	29	1	21	2
	65	1	7	0	2
	66	0	11	41	19
	67	3	5	30	32
	68	5	2	20	6
	69	35	0	10	11
	70	23	3	33	14
	71	2	2	65	8
	72	9	4	9	11
	73	2	15	32	0
	74	3	5	5	4
	75	13	0	21	9
	76	19	25	8	10
	77	27	28	27	16
	78	29	7	21	23
	79	23	10	17	22
	80	1	1	6	24
	81	15	4	49	2
	82	15	0	17	8
	83	45	28	29	1
	84	9	1	18	2
	85	28	32	4	2
	86	6	4	11	12
	87	53	27	6	30
	88	22	6	16	2
	89	9	3	0	7
	90	2	4	8	0
	91	2	13	0	0
	92	17	34	8	0
	93	1	4	4	24
	94	8	6	0	1
	95	14	34	0	9
	96	5	8	3	2
	97	7	18	18	1
	98	1	21	1	1
	99	50	24	1	4
	100	13	26	7	15
	101	21	16	6	6
	102	36	8	2	4
	103	27	36	10	14
	104	40	20	2	3
	105	24	26	22	1
	106	17	13	30	1
	107	49	8	5	3
	108	62	4	29	4
	109	39	10	9	5
	110	79	5	39	22
	111	36	23	20	8
	112	24	9	27	0
	113	31	12	14	17
	114	25	9	2	11
	115	18	32	15	5
	116	24	6	18	13
	117	57	8	5	18
	118	35	13	1	1
	119	20	14	1	1
	120	101	13	1	0
	121	21	9	2	6
	122	47	40	1	6
	123	52	3	2	9
	124	6	14	5	8
	125	6	16	7	17
	126	1	15	13	6
	127	4	3	2	1
	128	0	25	3	0
	129	1	7	5	0
	130	4	10	12	3
	131	40	7	0	27
	132	9	18	0	18
	133	79	17	19	10
	134	1	4	10	0
	135	3	2	7	8
	136	3	4	27	8
	137	32	12	12	8
	138	11	18	7	10
	139	3	15	12	0
	140	10	1	8	5
	141	8	7	10	1
	142	22	12	1	16
	143	7	3	7	27
	144	8	9	3	0
	145	20	41	11	9
	146	7	9	16	8
	147	20	14	3	3
	148	15	55	9	5
	149	13	8	0	11
	150	25	29	0	10
	151	27	2	0	3
	152	16	11	7	16
	153	57	7	11	6
	154	16	7	12	17
	155	10	22	8	20
	156	39	1	8	0
	157	10	33	0	6
	158	48	16	38	7
	159	7	38	1	2
	160	20	19	26	23
	161	18	34	8	3
	162	7	0	16	11
	163	28	5	10	20
	164	35	83	22	21
	165	13	31	10	5
	166	7	18	25	10
	167	11	31	12	1
	168	1	1	11	3
	169	4	23	21	2
	170	6	0	24	8
	171	14	0	26	4
	172	37	34	15	2
	173	19	19	26	2
	174	14	1	21	4
	175	21	23	23	16
	176	37	35	7	12
	177	17	2	19	20
	178	39	6	2	8
	179	26	6	19	5
	180	3	9	1	4
	181	9	7	25	21
	182	13	7	12	27
	183	20	16	7	16
	184	20	19	13	20
	185	10	6	48	6
	186	19	8	5	25
	187	8	5	16	1
	188	0	6	7	5
	189	2	3	29	20
	190	3	3	7	4
	191	2	2	70	13
	192	18	8	27	50
	193	10	5	45	13
	194	3	2	10	34
	195	0	2	8	19
	196	2	0	1	22
	197	7	5	42	18
	198	3	9	1	3
	199	6	28	41	16
	200	2	18	39	1
Trial 2	201	55	8	9	14
	202	28	17	5	46
	203	30	17	31	2
	204	37	7	20	2
	205	12	8	29	9
	206	9	6	3	5
	207	1	21	38	0
	208	10	26	17	1
	209	27	8	23	1
	210	40	16	8	60
	211	22	7	30	1
	212	15	7	15	1
	213	10	20	33	23
	214	5	5	19	27
	215	8	8	6	11
	216	30	21	9	6
	217	23	14	18	36
	218	8	7	24	11
	219	7	9	15	9
	220	47	11	12	33
	221	19	6	11	33
	222	14	3	15	37
	223	18	5	9	7
	224	3	35	13	20
	225	3	1	5	9
	226	23	25	11	6
	227	10	10	7	9
	228	13	20	13	10
	229	9	19	3	7
	230	10	11	7	11
	231	10	13	26	11
	232	38	16	0	18
	233	12	20	7	1
	234	7	28	3	1
	235	15	4	6	23
	236	9	32	3	22
	237	15	22	12	24
	238	11	23	6	3
	239	23	15	2	3
	240	89	15	0	0
	241	70	11	28	3
	242	22	32	1	15
	243	45	48	27	2
	244	13	16	23	5
	245	4	16	16	37
	246	37	17	3	0
	247	28	3	6	0
	248	39	35	12	2
	249	59	31	48	8
	250	50	7	26	11
	251	21	27	44	5
	252	85	15	39	0
	253	18	53	26	2
	254	61	17	8	12
	255	2	46	60	17
	256	15	20	52	24
	257	90	45	64	16
	258	34	33	56	18
	259	26	35	70	4
	260	7	16	55	3
	261	20	23	44	60
	262	47	12	68	6
	263	17	18	52	3
	264	38	16	26	9
	265	27	6	15	5
	266	37	24	22	18
	267	2	27	12	16
	268	4	23	3	1
	269	53	1	11	28
	270	20	2	19	12
	271	78	12	12	3
	272	36	11	9	30
	273	26	6	2	32
	274	70	10	1	11
	275	5	6	41	11
	276	17	15	21	42
	277	26	10	2	26
	278	28	2	19	37
	279	16	8	4	22
	280	17	26	13	2
	281	51	7	2	19
	282	23	14	20	33
	283	22	4	7	11
	284	11	12	11	7
	285	24	17	5	10
	286	22	19	2	61
	287	12	0	4	52
	288	7	16	12	26
	289	1	36	12	62
	290	19	45	11	83
	291	18	6	11	40
	292	16	40	20	33
	293	25	73	12	41
	294	10	55	21	35
	295	14	52	10	39
	296	2	39	17	38
	297	0	49	10	46
	298	34	38	1	17
	299	6	45	13	23
	300	51	47	14	4
	301	47	4	45	38
	302	35	25	15	14
	303	23	22	14	5
	304	28	3	3	5
	305	1	5	17	1
	306	41	10	22	14
	307	5	33	24	12
	308	29	21	8	10
	309	33	32	37	12
	310	28	11	30	19
	311	5	35	10	6
	312	17	9	22	23
	313	20	27	12	15
	314	2	2	22	5
	315	8	4	17	5
	316	12	33	34	8
	317	19	24	8	9
	318	16	53	21	17
	319	13	30	10	1
	320	6	24	18	11
	321	3	61	29	1
	322	25	55	16	18
	323	39	24	4	9
	324	57	47	5	7
	325	40	36	73	14
	326	3	55	25	9
	327	35	42	33	7
	328	59	46	32	12
	329	90	52	40	13
	330	49	8	50	18
	331	34	17	39	21
	332	15	18	42	10
	333	2	4	8	12
	334	83	38	45	13
	335	23	11	25	20
	336	9	9	53	5
	337	9	30	37	39
	338	31	32	35	27
	339	36	2	25	8
	340	17	1	28	12
	341	6	3	39	20
	342	47	6	17	4
	343	14	7	44	9
	344	27	11	6	31
	345	41	6	26	23
	346	37	1	2	23
	347	34	42	5	9
	348	30	20	19	8
	349	34	7	17	18
	350	16	2	32	38
	351	10	55	13	16
	352	18	32	10	36
	353	34	29	8	27
	354	42	52	7	58
	355	30	102	1	20
	356	27	58	15	35
	357	56	73	5	24
	358	12	30	10	33
	359	9	46	1	49
	360	63	45	35	49
	361	29	14	21	46
	362	36	59	9	34
	363	37	53	93	18
	364	32	48	16	18
	365	16	20	49	42
	366	21	15	18	13
	367	15	44	67	50
	368	12	29	8	33
	369	38	12	31	52
	370	48	17	21	50
	371	48	34	40	20
	372	4	25	37	34
	373	6	23	19	28
	374	24	4	28	10
	375	25	19	17	3
	376	36	3	28	19
	377	34	34	26	13
	378	30	42	89	14
	379	49	35	63	113
	380	35	17	12	36
	381	12	27	53	30
	382	33	5	19	39
	383	24	39	22	32
	384	13	32	38	30
	385	2	31	25	9
	386	3	9	34	85
	387	3	29	61	28
	388	9	39	26	19
	389	13	28	42	80
	390	4	60	44	21
	391	7	15	37	8
	392	22	33	44	13
	393	24	18	25	6
	394	10	8	39	0
	395	10	41	3	4
	396	38	18	31	4
	397	36	48	21	11
	398	8	3	42	9
	399	13	46	32	22
	400	15	19	5	1
Trial 3	401	34	9	14	31
	402	57	26	31	24
	403	40	18	10	25
	404	37	12	29	9
	405	18	39	10	25
	406	35	15	28	21
	407	37	36	12	8
	408	47	39	16	17
	409	18	31	34	20
	410	44	17	30	19
	411	47	35	29	18
	412	40	22	33	27
	413	34	24	8	14
	414	42	4	1	26
	415	9	19	26	37
	416	43	31	9	23
	417	35	4	3	27
	418	24	14	0	13
	419	21	68	8	7
	420	57	7	7	39
	421	26	35	3	8
	422	25	34	4	24
	423	33	7	7	24
	424	39	47	2	29
	425	53	48	13	14
	426	39	17	0	30
	427	5	26	0	10
	428	29	33	12	1
	429	26	13	9	1
	430	16	19	1	0
	431	6	29	9	2
	432	23	32	6	8
	433	6	17	33	19
	434	18	19	20	34
	435	28	22	10	39
	436	29	41	12	47
	437	29	7	0	70
	438	39	3	53	17
	439	6	6	36	18
	440	10	27	12	53
	441	24	19	60	57
	442	8	37	23	98
	443	27	0	5	76
	444	28	6	24	84
	445	48	28	2	75
	446	23	11	14	50
	447	24	21	4	136
	448	55	28	11	117
	449	37	8	9	85
	450	12	3	61	9
	451	17	13	23	18
	452	0	18	96	24
	453	29	6	16	2
	454	10	19	50	7
	455	1	25	13	71
	456	0	35	11	0
	457	1	22	74	3
	458	3	42	21	6
	459	2	25	28	3
	460	5	7	44	47
	461	11	43	31	24
	462	39	26	63	18
	463	12	15	57	11
	464	38	14	66	13
	465	43	12	18	4
	466	42	9	26	21
	467	0	13	4	15
	468	45	6	35	8
	469	0	27	42	53
	470	1	2	21	58
	471	0	18	19	35
	472	2	13	7	7
	473	3	0	41	19
	474	4	2	18	42
	475	13	0	16	36
	476	18	17	61	20
	477	15	22	17	12
	478	4	37	35	6
	479	23	25	33	9
	480	24	21	6	2
	481	19	17	2	5
	482	23	10	14	2
	483	18	21	22	10
	484	47	24	12	13
	485	17	37	3	9
	486	13	13	6	8
	487	36	12	4	17
	488	15	1	5	8
	489	41	18	8	5
	490	24	9	4	13
	491	40	24	8	9
	492	30	11	3	43
	493	22	20	8	4
	494	59	15	24	16
	495	44	18	3	20
	496	12	29	15	6
	497	19	40	17	64
	498	9	38	0	6
	499	54	6	3	17
	500	62	37	5	10
	501	15	36	24	68
	502	9	37	3	31
	503	29	27	35	42
	504	33	18	0	9
	505	29	5	14	24
	506	65	13	3	58
	507	51	27	1	0
	508	38	36	7	36
	509	15	39	5	6
	510	41	57	9	15
	511	34	16	2	9
	512	24	7	1	12
	513	31	7	11	3
	514	36	28	8	5
	515	8	40	7	22
	516	26	24	3	10
	517	26	35	16	32
	518	14	25	33	4
	519	41	71	4	26
	520	41	30	10	9
	521	13	37	7	37
	522	28	26	25	20
	523	8	19	11	20
	524	10	48	0	54
	525	15	58	46	23
	526	43	38	38	48
	527	48	61	44	80
	528	17	34	20	66
	529	43	3	26	52
	530	19	24	24	79
	531	23	64	25	78
	532	27	19	15	7
	533	27	20	19	8
	534	17	15	8	30
	535	13	29	15	6
	536	23	9	18	25
	537	14	5	8	58
	538	35	13	43	8
	539	4	2	66	26
	540	4	0	65	6
	541	29	7	27	7
	542	32	13	53	48
	543	30	24	26	1
	544	11	5	11	15
	545	32	2	10	1
	546	31	5	11	15
	547	56	28	23	40
	548	12	11	16	50
	549	61	7	10	17
	550	34	2	26	40
	551	42	8	6	37
	552	34	7	8	26
	553	20	2	12	55
	554	21	8	8	31
	555	22	0	11	44
	556	47	23	8	11
	557	11	2	4	11
	558	36	7	27	49
	559	36	3	4	60
	560	31	5	18	32
	561	20	11	18	21
	562	8	4	12	88
	563	28	2	19	15
	564	23	16	10	33
	565	27	1	33	2
	566	28	16	17	34
	567	7	11	16	3
	568	11	10	23	3
	569	18	12	22	3
	570	5	7	26	13
	571	42	14	35	32
	572	35	14	61	6
	573	10	12	45	3
	574	24	6	38	16
	575	2	9	38	3
	576	15	1	47	13
	577	6	1	28	10
	578	12	3	14	6
	579	13	5	32	11
	580	16	2	43	19
	581	39	27	24	25
	582	13	30	13	11
	583	33	3	6	20
	584	19	4	31	39
	585	6	12	55	8
	586	31	21	43	42
	587	2	16	30	18
	588	17	19	31	20
	589	0	27	53	24
	590	2	18	17	5
	591	20	5	21	12
	592	16	63	52	19
	593	7	26	69	29
	594	4	13	23	22
	595	7	14	59	19
	596	6	0	33	36
	597	31	25	38	13
	598	26	36	11	25
	599	31	12	44	6
	600	46	59	55	14

## Sheet: 8D - RAD51 foci 5d Dox
RAD51 foci in EdU+ cells, Dox 5 days		Cell line: U2OS shPALB2 EV, WT and variants (flag)
n= 200 cells/ trial		UNTREATED
Total n= 600 cells over 3 trials	cell	EV	WT	7Q	7R
Trial 1	1	0	4	0	0			Trial 1
	2	2	3	1	6			Trial 2
	3	1	2	0	0			Trial 3
	4	0	1	0	10
	5	0	2	0	0
	6	5	0	2	0
	7	0	8	3	1
	8	5	0	0	5
	9	0	2	3	1
	10	0	4	0	7
	11	0	2	0	2
	12	4	2	2	0
	13	0	1	2	3
	14	3	8	2	17
	15	0	2	1	10
	16	0	4	5	7
	17	0	1	1	5
	18	0	1	0	1
	19	1	1	0	0
	20	11	4	0	1
	21	1	1	0	3
	22	0	1	0	2
	23	7	14	0	2
	24	2	5	0	0
	25	8	3	6	6
	26	2	0	2	0
	27	1	6	0	0
	28	2	0	0	0
	29	0	2	1	0
	30	0	7	5	1
	31	0	4	2	0
	32	0	0	3	8
	33	0	7	2	4
	34	0	8	3	5
	35	0	4	1	6
	36	0	2	2	0
	37	0	1	2	0
	38	0	3	3	0
	39	0	0	0	0
	40	0	6	4	2
	41	0	4	4	0
	42	0	0	0	1
	43	0	0	0	0
	44	0	3	0	0
	45	0	2	0	1
	46	0	1	1	7
	47	0	0	1	0
	48	0	3	0	4
	49	0	7	0	4
	50	0	2	2	0
	51	0	2	0	4
	52	0	3	1	1
	53	0	1	0	3
	54	0	3	0	3
	55	0	3	1	1
	56	0	2	0	6
	57	0	2	3	0
	58	0	2	0	3
	59	0	2	0	11
	60	0	9	4	8
	61	0	3	1	2
	62	0	2	0	2
	63	0	8	0	1
	64	0	6	2	1
	65	0	1	1	1
	66	3	4	1	1
	67	4	2	0	0
	68	6	4	2	4
	69	6	13	0	0
	70	11	14	5	1
	71	4	5	3	8
	72	2	33	1	0
	73	3	17	2	2
	74	9	5	1	0
	75	15	5	3	0
	76	0	7	6	3
	77	5	6	0	5
	78	9	14	2	6
	79	3	4	1	2
	80	0	28	1	0
	81	19	16	0	4
	82	12	6	2	1
	83	4	7	2	5
	84	11	11	1	0
	85	0	18	4	2
	86	0	10	2	5
	87	0	11	0	17
	88	0	6	4	1
	89	0	17	2	12
	90	1	9	0	8
	91	2	25	0	6
	92	0	13	0	18
	93	0	2	0	9
	94	0	1	0	1
	95	0	3	0	0
	96	0	0	0	0
	97	0	0	0	0
	98	0	1	0	4
	99	0	4	1	10
	100	0	2	0	0
	101	0	0	1	2
	102	0	1	0	0
	103	0	3	0	0
	104	10	4	0	6
	105	1	1	0	3
	106	1	1	0	3
	107	0	1	0	0
	108	0	1	1	13
	109	0	2	0	1
	110	0	1	4	2
	111	0	1	3	4
	112	0	7	1	6
	113	1	0	2	0
	114	0	3	0	0
	115	0	5	4	6
	116	0	2	1	0
	117	0	0	1	1
	118	0	0	1	4
	119	0	0	3	0
	120	0	4	1	3
	121	0	1	2	4
	122	0	0	0	0
	123	0	0	0	0
	124	0	0	1	1
	125	0	1	0	0
	126	0	1	0	4
	127	0	1	0	0
	128	0	0	0	2
	129	0	2	0	3
	130	0	1	0	0
	131	0	1	0	3
	132	0	5	0	0
	133	0	1	0	9
	134	0	4	0	0
	135	0	5	1	1
	136	0	2	2	0
	137	0	2	2	1
	138	0	3	1	0
	139	0	0	0	3
	140	0	0	1	3
	141	0	0	0	0
	142	0	0	1	6
	143	0	1	3	17
	144	4	2	2	0
	145	0	5	1	1
	146	0	6	1	1
	147	0	8	5	0
	148	1	2	7	1
	149	1	1	2	1
	150	0	1	2	0
	151	2	1	4	3
	152	1	1	6	0
	153	0	0	6	1
	154	4	2	5	6
	155	0	0	2	9
	156	0	7	2	2
	157	3	4	3	0
	158	0	1	6	1
	159	1	2	4	3
	160	0	3	3	2
	161	8	2	5	1
	162	3	5	0	2
	163	0	4	9	7
	164	0	1	2	6
	165	0	7	5	0
	166	0	10	11	0
	167	0	0	9	3
	168	0	5	10	7
	169	0	0	17	0
	170	0	0	17	0
	171	0	0	9	5
	172	0	1	10	6
	173	0	0	5	1
	174	0	7	15	1
	175	0	2	24	0
	176	0	1	0	0
	177	0	7	0	0
	178	0	7	2	0
	179	0	6	0	9
	180	0	5	0	0
	181	0	5	1	1
	182	0	1	2	3
	183	1	4	0	1
	184	0	0	1	0
	185	0	1	5	0
	186	0	0	4	4
	187	0	0	1	9
	188	0	0	1	0
	189	0	2	0	5
	190	0	0	1	3
	191	0	0	3	2
	192	0	6	0	2
	193	0	0	0	0
	194	0	0	0	0
	195	0	0	0	2
	196	0	0	2	0
	197	0	0	1	0
	198	0	0	2	0
	199	0	1	0	2
	200	0	6	1	0
Trial 2	201	0	0	2	1
	202	0	0	2	1
	203	0	0	4	0
	204	0	0	5	0
	205	3	0	4	4
	206	0	0	2	0
	207	0	5	1	1
	208	0	2	3	6
	209	0	0	8	3
	210	0	0	0	3
	211	0	0	0	11
	212	0	1	2	7
	213	0	0	0	1
	214	0	0	1	2
	215	0	0	0	1
	216	0	1	1	2
	217	8	4	1	5
	218	0	0	0	2
	219	0	2	0	7
	220	1	5	1	7
	221	2	2	1	0
	222	0	2	2	2
	223	0	0	0	1
	224	0	0	0	4
	225	0	2	0	17
	226	0	0	0	0
	227	0	4	0	3
	228	0	1	3	2
	229	0	4	5	6
	230	0	0	1	1
	231	0	3	0	0
	232	1	2	0	0
	233	0	2	0	0
	234	0	7	2	0
	235	3	5	3	3
	236	1	1	3	8
	237	0	2	4	1
	238	1	2	2	2
	239	0	1	2	2
	240	2	1	2	0
	241	1	1	1	8
	242	1	6	5	1
	243	0	5	3	5
	244	0	4	7	0
	245	13	3	7	0
	246	0	10	1	0
	247	3	0	2	1
	248	1	0	2	1
	249	0	5	4	0
	250	0	2	1	0
	251	0	5	2	0
	252	3	1	3	1
	253	0	0	1	0
	254	3	0	1	1
	255	0	0	0	0
	256	0	0	0	0
	257	0	0	1	0
	258	0	0	1	0
	259	0	0	2	6
	260	0	0	2	0
	261	0	0	3	0
	262	0	0	0	1
	263	1	0	2	0
	264	1	0	3	9
	265	0	0	3	1
	266	0	1	0	0
	267	0	0	2	0
	268	2	2	5	1
	269	1	0	3	1
	270	0	1	0	2
	271	2	1	0	0
	272	2	0	0	1
	273	7	3	0	0
	274	2	2	0	3
	275	7	7	0	2
	276	4	2	0	0
	277	6	7	0	14
	278	3	2	0	3
	279	0	8	0	0
	280	0	1	0	0
	281	0	6	0	0
	282	0	5	0	1
	283	0	3	0	3
	284	0	7	0	5
	285	0	8	0	1
	286	3	7	2	0
	287	5	0	1	1
	288	3	4	0	1
	289	2	1	2	1
	290	0	5	0	1
	291	0	6	1	0
	292	0	2	2	0
	293	0	2	1	2
	294	0	1	0	0
	295	0	0	3	0
	296	0	0	3	0
	297	0	0	2	0
	298	0	0	0	0
	299	0	0	8	1
	300	0	1	3	2
	301	0	0	0	3
	302	1	0	1	1
	303	0	7	0	3
	304	0	0	4	3
	305	0	0	1	1
	306	0	18	0	1
	307	0	0	0	1
	308	0	1	5	12
	309	0	7	0	3
	310	0	4	5	1
	311	0	0	2	0
	312	0	0	3	0
	313	0	4	0	3
	314	0	2	2	1
	315	0	1	0	1
	316	0	3	5	8
	317	0	3	0	6
	318	2	2	4	5
	319	0	4	0	2
	320	0	3	0	0
	321	3	0	2	1
	322	2	0	2	0
	323	3	2	0	0
	324	0	1	0	0
	325	0	2	0	12
	326	0	2	3	1
	327	0	2	1	1
	328	1	4	0	0
	329	0	5	0	4
	330	1	3	0	8
	331	0	2	0	0
	332	4	0	0	3
	333	0	12	0	0
	334	2	5	6	7
	335	3	0	1	3
	336	1	4	4	9
	337	2	4	0	5
	338	4	0	0	10
	339	4	1	2	6
	340	7	0	0	1
	341	3	0	3	2
	342	1	2	2	0
	343	4	0	0	3
	344	5	3	3	2
	345	4	6	1	3
	346	4	5	0	1
	347	1	5	0	7
	348	5	4	2	1
	349	4	7	0	1
	350	4	0	4	1
	351	11	2	0	4
	352	1	5	5	2
	353	3	1	0	1
	354	0	1	1	0
	355	0	0	3	0
	356	0	3	1	0
	357	0	2	1	0
	358	0	5	5	0
	359	0	4	3	0
	360	0	0	0	0
	361	0	0	2	0
	362	0	3	0	0
	363	2	5	0	0
	364	0	1	7	0
	365	0	7	0	0
	366	2	5	2	5
	367	1	0	0	2
	368	0	1	0	2
	369	2	7	0	4
	370	0	6	0	1
	371	2	6	2	2
	372	0	0	3	1
	373	0	3	0	0
	374	0	3	0	0
	375	1	4	0	1
	376	0	2	3	0
	377	0	1	0	0
	378	0	4	1	0
	379	0	1	2	0
	380	0	1	2	0
	381	0	1	0	3
	382	0	1	0	0
	383	11	0	0	0
	384	1	2	0	1
	385	0	1	3	2
	386	0	2	1	16
	387	2	3	3	2
	388	3	5	5	6
	389	1	0	2	4
	390	1	1	1	4
	391	4	4	4	0
	392	2	0	2	4
	393	2	3	1	2
	394	1	7	11	0
	395	6	4	1	3
	396	4	0	2	1
	397	1	0	5	2
	398	6	8	0	1
	399	1	0	0	9
	400	2	0	5	1
Trial 3	401	0	0	1	0
	402	1	0	1	2
	403	0	2	1	2
	404	0	10	11	1
	405	0	1	0	5
	406	0	1	1	0
	407	2	0	1	1
	408	3	2	2	0
	409	0	10	1	8
	410	2	6	1	0
	411	0	0	0	4
	412	5	1	1	0
	413	3	1	0	0
	414	2	0	0	0
	415	0	1	1	0
	416	0	1	4	0
	417	0	1	2	6
	418	2	3	0	0
	419	0	1	1	2
	420	1	14	0	0
	421	0	0	0	0
	422	1	5	0	1
	423	0	7	1	3
	424	0	0	4	4
	425	0	0	3	0
	426	0	2	0	2
	427	0	1	4	0
	428	5	7	0	2
	429	8	0	0	7
	430	2	0	0	0
	431	0	3	0	15
	432	11	0	0	5
	433	6	0	6	12
	434	6	1	0	0
	435	1	5	3	1
	436	0	4	4	4
	437	3	0	0	3
	438	0	13	0	0
	439	5	0	2	4
	440	5	0	0	1
	441	6	2	1	3
	442	0	3	1	6
	443	0	9	2	0
	444	0	0	0	1
	445	0	6	2	0
	446	0	10	0	3
	447	0	5	2	8
	448	1	3	5	0
	449	0	0	0	0
	450	0	11	0	0
	451	0	5	0	0
	452	0	4	0	0
	453	0	0	1	0
	454	0	6	0	1
	455	0	1	1	3
	456	0	4	1	5
	457	2	1	1	0
	458	0	0	4	5
	459	0	5	0	0
	460	0	8	0	2
	461	0	4	0	1
	462	0	3	6	0
	463	2	4	5	6
	464	0	1	0	5
	465	0	0	8	0
	466	2	1	3	1
	467	0	2	1	7
	468	1	3	7	0
	469	8	11	0	4
	470	1	3	0	2
	471	0	10	0	0
	472	2	10	0	2
	473	0	0	5	0
	474	2	3	0	0
	475	1	8	1	3
	476	0	4	4	0
	477	0	11	7	0
	478	0	0	2	1
	479	0	0	0	0
	480	0	2	2	0
	481	0	0	4	0
	482	0	0	0	3
	483	0	1	4	2
	484	0	2	7	0
	485	0	0	0	9
	486	0	2	3	1
	487	0	2	3	0
	488	0	4	1	10
	489	1	3	6	0
	490	0	1	0	4
	491	0	0	9	0
	492	3	0	1	0
	493	0	0	4	0
	494	0	1	1	5
	495	0	1	6	0
	496	0	5	4	0
	497	0	3	0	14
	498	0	8	4	0
	499	0	0	2	0
	500	0	0	4	1
	501	0	0	1	1
	502	0	3	9	1
	503	0	0	4	0
	504	0	0	2	0
	505	0	3	5	0
	506	0	4	5	2
	507	0	10	0	0
	508	0	6	0	7
	509	0	12	0	0
	510	0	1	9	4
	511	0	1	3	2
	512	0	1	3	0
	513	0	1	12	2
	514	0	6	0	1
	515	0	4	0	0
	516	0	2	0	1
	517	0	3	0	0
	518	0	0	0	3
	519	0	1	3	0
	520	0	1	0	1
	521	0	4	0	6
	522	0	0	0	16
	523	0	5	6	1
	524	0	20	6	4
	525	0	0	0	6
	526	0	3	2	1
	527	0	2	0	9
	528	0	1	1	2
	529	0	7	0	3
	530	5	9	0	4
	531	0	3	0	13
	532	1	3	0	0
	533	0	2	0	0
	534	1	1	1	0
	535	0	4	0	0
	536	1	9	0	2
	537	0	13	0	8
	538	0	4	4	9
	539	0	4	3	3
	540	1	1	4	2
	541	0	1	3	1
	542	2	9	7	6
	543	1	1	1	7
	544	1	7	0	1
	545	0	0	2	6
	546	3	1	5	0
	547	1	2	1	0
	548	0	1	0	0
	549	0	7	0	0
	550	2	6	1	6
	551	9	6	3	3
	552	0	0	2	0
	553	0	0	0	0
	554	0	1	6	6
	555	0	0	2	0
	556	1	0	0	3
	557	7	2	0	0
	558	0	1	0	0
	559	0	6	0	0
	560	3	1	0	0
	561	0	1	1	0
	562	0	2	1	3
	563	0	0	3	1
	564	0	0	0	0
	565	0	3	4	0
	566	0	0	2	2
	567	0	0	1	0
	568	0	0	2	3
	569	0	0	0	0
	570	0	2	0	1
	571	0	0	3	0
	572	0	0	4	0
	573	0	1	5	0
	574	2	2	9	0
	575	0	4	0	1
	576	1	0	1	0
	577	0	0	4	1
	578	0	0	0	2
	579	0	4	9	0
	580	0	0	1	8
	581	0	0	0	0
	582	8	0	1	2
	583	0	0	3	0
	584	0	0	3	0
	585	0	0	1	8
	586	0	3	0	2
	587	0	0	0	0
	588	0	0	7	7
	589	1	0	0	0
	590	0	0	0	3
	591	2	0	8	10
	592	1	0	0	8
	593	0	0	0	9
	594	0	1	0	15
	595	1	0	0	7
	596	0	5	4	0
	597	0	0	1	2
	598	5	0	5	1
	599	1	0	3	10
	600	0	0	4	6

## Sheet: 8E - yH2AX foci 5d Dox
yH2AX foci in EdU+ cells, Dox 5 days		Cell line: U2OS shPALB2 EV, WT and variants (flag)
n= 200 cells/ trial		UNTREATED
Total n= 600 cells over 3 trials	cell	EV	WT	7Q	7R
Trial 1	1	33	20	9	5			Trial 1
	2	61	33	42	40			Trial 2
	3	43	55	37	4			Trial 3
	4	27	20	32	19
	5	27	70	3	12
	6	84	25	24	0
	7	26	42	23	22
	8	68	19	10	21
	9	37	26	19	11
	10	50	26	23	16
	11	41	36	9	0
	12	33	51	23	7
	13	50	53	13	22
	14	41	27	19	36
	15	49	67	25	16
	16	21	12	37	15
	17	29	22	49	30
	18	28	32	30	6
	19	20	23	46	27
	20	43	41	103	33
	21	79	51	9	15
	22	12	34	22	24
	23	24	13	32	46
	24	24	34	63	14
	25	33	35	12	13
	26	47	27	28	24
	27	44	10	14	78
	28	44	33	49	26
	29	61	41	18	49
	30	30	23	24	32
	31	27	25	42	59
	32	19	56	49	37
	33	26	32	25	33
	34	32	23	30	23
	35	20	60	55	24
	36	16	23	9	43
	37	27	29	48	35
	38	17	28	40	22
	39	80	34	32	26
	40	16	17	12	62
	41	68	21	30	36
	42	36	17	70	3
	43	37	21	25	79
	44	64	23	23	16
	45	18	43	36	37
	46	50	41	23	12
	47	39	46	40	55
	48	33	30	34	15
	49	41	27	45	2
	50	59	15	18	19
	51	67	27	36	1
	52	102	33	58	24
	53	20	28	41	22
	54	42	18	15	25
	55	40	42	34	64
	56	58	18	39	23
	57	75	38	52	37
	58	22	55	24	51
	59	21	14	31	28
	60	8	12	10	18
	61	27	26	28	24
	62	36	22	20	27
	63	34	6	11	42
	64	15	20	16	35
	65	29	6	0	38
	66	34	8	3	21
	67	13	3	10	8
	68	3	2	32	19
	69	34	2	14	52
	70	9	26	20	3
	71	15	15	46	19
	72	13	46	36	62
	73	50	16	33	46
	74	12	19	122	65
	75	20	15	28	38
	76	21	36	28	54
	77	67	19	119	19
	78	56	26	5	18
	79	65	21	57	56
	80	51	19	25	36
	81	2	43	113	23
	82	109	32	39	5
	83	10	19	41	15
	84	21	31	22	36
	85	92	33	32	46
	86	67	7	35	61
	87	37	34	16	46
	88	48	30	100	9
	89	26	42	28	7
	90	31	32	23	28
	91	9	11	23	55
	92	39	16	37	30
	93	39	20	52	13
	94	91	6	30	29
	95	49	44	16	6
	96	151	11	27	46
	97	113	29	13	34
	98	154	10	26	57
	99	62	16	49	10
	100	33	44	48	22
	101	29	36	36	34
	102	66	42	21	20
	103	51	34	17	22
	104	57	21	15	30
	105	24	42	16	31
	106	39	50	18	32
	107	29	35	49	32
	108	80	21	50	56
	109	24	34	53	3
	110	36	39	69	26
	111	13	26	19	35
	112	63	33	29	12
	113	9	6	28	48
	114	183	16	46	6
	115	38	38	36	69
	116	39	10	9	32
	117	29	22	12	6
	118	19	55	32	20
	119	32	45	6	20
	120	41	18	9	26
	121	19	44	12	33
	122	36	30	29	37
	123	16	7	28	89
	124	29	4	40	25
	125	34	29	14	52
	126	49	11	20	20
	127	14	17	39	15
	128	20	17	11	45
	129	43	19	9	46
	130	3	16	11	54
	131	39	19	15	45
	132	53	41	32	23
	133	57	16	3	5
	134	39	1	14	73
	135	89	35	49	41
	136	66	30	15	31
	137	102	22	28	19
	138	24	17	34	22
	139	36	28	52	36
	140	9	43	59	9
	141	15	43	88	27
	142	1	49	27	9
	143	0	34	37	68
	144	33	32	17	68
	145	31	31	14	2
	146	74	33	5	4
	147	38	48	6	77
	148	45	34	41	74
	149	49	22	9	24
	150	32	38	10	15
	151	68	22	75	10
	152	86	26	7	50
	153	71	22	20	53
	154	23	21	13	50
	155	42	24	11	44
	156	86	17	30	9
	157	33	18	32	2
	158	36	20	41	11
	159	31	9	25	12
	160	44	40	33	7
	161	27	21	16	4
	162	18	9	9	11
	163	38	33	9	6
	164	36	23	48	0
	165	17	6	22	11
	166	15	19	21	18
	167	25	24	38	7
	168	9	51	25	6
	169	44	11	47	20
	170	17	47	63	10
	171	11	49	30	49
	172	15	27	18	63
	173	9	21	27	2
	174	10	6	36	3
	175	25	35	46	30
	176	42	17	28	23
	177	28	11	17	39
	178	66	5	54	15
	179	79	12	40	20
	180	51	29	42	21
	181	27	9	33	30
	182	33	36	39	20
	183	20	32	53	3
	184	10	37	10	49
	185	20	50	54	31
	186	36	72	54	42
	187	33	28	34	68
	188	3	57	78	47
	189	38	30	46	11
	190	14	5	33	69
	191	40	9	42	10
	192	6	2	50	30
	193	67	27	24	15
	194	65	3	18	120
	195	34	40	41	39
	196	94	36	33	37
	197	44	2	22	48
	198	94	43	20	44
	199	21	11	69	39
	200	13	2	24	44
Trial 2	201	29	8	66	60
	202	23	4	23	63
	203	29	6	59	68
	204	51	13	56	26
	205	40	14	22	54
	206	13	12	43	42
	207	33	10	22	48
	208	31	6	55	46
	209	16	1	63	56
	210	23	27	26	17
	211	45	8	26	46
	212	33	5	109	20
	213	21	7	24	54
	214	18	0	27	21
	215	28	4	19	9
	216	13	3	23	29
	217	16	2	33	19
	218	11	2	23	11
	219	50	44	28	16
	220	58	4	48	17
	221	3	9	40	5
	222	21	29	28	13
	223	15	12	29	14
	224	12	8	26	33
	225	11	19	34	24
	226	18	4	29	43
	227	28	9	34	80
	228	21	27	63	34
	229	22	45	27	89
	230	19	37	82	40
	231	10	39	76	109
	232	8	9	69	49
	233	30	31	28	38
	234	68	41	39	12
	235	23	36	26	24
	236	32	18	8	75
	237	18	12	21	46
	238	41	10	40	33
	239	39	13	14	19
	240	74	26	13	21
	241	146	12	31	142
	242	43	25	27	34
	243	113	25	35	65
	244	47	25	33	35
	245	11	35	39	13
	246	26	32	34	82
	247	80	22	17	47
	248	29	13	34	37
	249	33	17	47	45
	250	54	23	27	20
	251	23	22	23	28
	252	15	43	45	24
	253	62	13	34	35
	254	12	25	48	31
	255	10	37	25	10
	256	41	21	60	31
	257	28	57	39	36
	258	20	72	49	23
	259	65	53	37	24
	260	31	63	54	21
	261	34	18	45	1
	262	38	42	66	16
	263	22	18	31	2
	264	25	40	25	52
	265	37	22	21	39
	266	18	8	41	21
	267	10	10	15	52
	268	44	9	35	47
	269	41	11	48	58
	270	13	18	26	35
	271	27	3	18	52
	272	19	1	42	63
	273	35	10	27	27
	274	22	24	43	39
	275	21	37	37	27
	276	19	43	25	35
	277	10	83	15	45
	278	18	27	29	36
	279	18	56	24	29
	280	12	44	21	5
	281	20	46	26	23
	282	7	44	28	45
	283	19	60	53	62
	284	16	61	32	45
	285	15	32	43	32
	286	10	109	32	23
	287	35	27	76	16
	288	52	45	37	25
	289	27	21	51	29
	290	34	40	37	27
	291	28	31	31	27
	292	65	17	25	32
	293	21	14	25	36
	294	28	19	33	24
	295	70	11	24	20
	296	35	3	31	18
	297	8	14	20	25
	298	39	4	27	21
	299	13	28	35	34
	300	13	13	27	17
	301	43	11	23	30
	302	19	37	10	34
	303	18	16	28	57
	304	40	9	37	37
	305	25	0	57	26
	306	26	22	20	52
	307	7	52	3	45
	308	31	18	38	77
	309	13	10	15	72
	310	30	30	14	21
	311	53	23	25	42
	312	24	32	108	29
	313	25	21	84	29
	314	25	16	38	41
	315	23	9	29	44
	316	24	15	28	58
	317	35	9	26	31
	318	29	5	26	38
	319	19	7	35	41
	320	39	6	37	46
	321	16	8	32	68
	322	36	19	34	31
	323	15	24	21	42
	324	77	8	20	19
	325	16	11	36	23
	326	35	5	39	57
	327	29	10	25	26
	328	30	8	37	7
	329	23	27	22	20
	330	19	34	32	41
	331	22	11	27	23
	332	4	27	11	65
	333	19	24	49	37
	334	20	40	36	44
	335	11	3	43	56
	336	25	11	20	41
	337	1	12	17	51
	338	15	17	28	18
	339	32	9	24	69
	340	13	13	24	32
	341	31	6	38	19
	342	25	5	34	18
	343	5	44	28	21
	344	81	30	59	42
	345	81	6	39	35
	346	35	26	29	11
	347	48	43	9	13
	348	44	32	110	16
	349	41	45	12	7
	350	58	24	22	34
	351	42	33	38	15
	352	55	44	41	14
	353	44	32	35	33
	354	26	43	42	27
	355	32	42	37	25
	356	32	24	61	20
	357	15	44	48	33
	358	39	22	50	34
	359	41	29	31	19
	360	30	7	73	23
	361	45	26	59	36
	362	22	42	48	23
	363	26	32	17	25
	364	40	30	51	65
	365	110	29	52	44
	366	54	20	31	15
	367	30	24	83	27
	368	63	26	19	43
	369	28	15	18	28
	370	23	20	58	59
	371	26	20	36	48
	372	40	20	40	48
	373	46	13	45	17
	374	30	15	29	18
	375	49	25	37	25
	376	52	29	42	19
	377	98	1	43	40
	378	34	32	48	21
	379	18	18	47	30
	380	31	9	43	19
	381	114	23	21	57
	382	32	7	12	63
	383	43	42	75	43
	384	57	27	12	9
	385	74	9	5	35
	386	10	35	22	19
	387	118	21	13	59
	388	8	10	11	35
	389	22	5	23	11
	390	39	13	14	33
	391	57	14	29	17
	392	55	9	23	40
	393	20	18	18	26
	394	48	22	25	12
	395	65	12	14	18
	396	28	9	17	49
	397	23	15	40	18
	398	43	18	20	46
	399	20	4	48	100
	400	47	19	27	27
Trial 3	401	12	8	7	43
	402	20	5	45	35
	403	18	8	16	37
	404	18	23	6	85
	405	34	10	25	34
	406	32	24	32	49
	407	40	1	33	32
	408	16	27	22	85
	409	37	31	11	52
	410	29	20	24	29
	411	22	29	22	11
	412	23	11	19	23
	413	26	15	11	11
	414	22	18	10	6
	415	21	22	44	95
	416	26	19	11	33
	417	49	14	49	24
	418	23	26	40	55
	419	15	45	13	26
	420	14	21	26	37
	421	40	24	18	32
	422	99	35	38	57
	423	29	31	15	91
	424	116	16	40	51
	425	107	26	24	27
	426	31	9	39	32
	427	73	31	13	51
	428	53	42	16	12
	429	10	38	34	14
	430	26	22	15	31
	431	50	13	26	30
	432	64	17	47	33
	433	49	32	24	20
	434	76	43	19	28
	435	11	27	32	29
	436	37	37	52	26
	437	15	19	31	57
	438	57	36	4	78
	439	39	22	27	54
	440	47	13	17	61
	441	60	17	26	13
	442	138	18	0	10
	443	48	34	5	6
	444	52	18	9	22
	445	25	18	39	18
	446	27	22	24	11
	447	16	16	14	31
	448	47	22	19	29
	449	40	25	9	35
	450	87	25	48	21
	451	23	20	46	48
	452	10	20	34	21
	453	33	5	25	5
	454	28	23	42	27
	455	24	15	10	20
	456	45	29	22	21
	457	21	14	80	21
	458	21	2	45	15
	459	17	17	27	24
	460	43	28	25	4
	461	49	40	22	23
	462	86	36	26	51
	463	30	20	8	2
	464	46	12	6	48
	465	26	12	28	11
	466	44	9	94	2
	467	24	15	41	28
	468	37	21	47	36
	469	31	36	40	36
	470	53	14	30	18
	471	50	19	28	31
	472	41	30	48	50
	473	11	37	29	43
	474	17	35	56	5
	475	70	37	47	44
	476	33	28	54	18
	477	11	42	17	13
	478	54	30	60	14
	479	9	19	26	64
	480	12	48	33	41
	481	8	16	33	8
	482	41	21	73	19
	483	109	15	61	23
	484	119	21	40	5
	485	20	8	15	29
	486	33	30	19	5
	487	80	11	47	13
	488	62	43	13	18
	489	12	16	57	80
	490	85	19	17	6
	491	52	41	12	59
	492	49	29	16	67
	493	57	0	25	20
	494	47	38	49	29
	495	54	21	22	23
	496	112	34	65	11
	497	80	30	66	46
	498	49	29	44	31
	499	57	8	63	71
	500	94	12	59	56
	501	36	14	26	52
	502	76	23	60	110
	503	36	37	7	10
	504	5	17	11	11
	505	19	31	20	63
	506	37	31	3	42
	507	37	29	38	49
	508	11	27	58	20
	509	10	31	8	27
	510	32	44	20	40
	511	0	51	34	39
	512	35	28	101	37
	513	34	31	84	25
	514	17	32	65	20
	515	44	35	54	36
	516	38	39	47	19
	517	78	17	6	33
	518	64	23	23	24
	519	11	13	141	19
	520	26	17	70	37
	521	61	42	32	21
	522	88	12	23	8
	523	43	26	44	33
	524	49	17	87	50
	525	87	22	60	47
	526	34	13	164	37
	527	31	4	106	6
	528	38	24	33	26
	529	49	7	5	37
	530	21	2	21	35
	531	3	3	12	42
	532	21	38	5	19
	533	5	20	7	14
	534	51	16	3	18
	535	64	10	19	14
	536	18	16	9	54
	537	9	28	1	26
	538	29	27	17	11
	539	20	39	4	6
	540	87	41	20	48
	541	26	20	20	38
	542	54	34	28	29
	543	35	21	17	19
	544	72	41	8	1
	545	36	27	4	16
	546	54	40	1	48
	547	70	11	17	51
	548	45	10	26	45
	549	27	16	11	48
	550	58	15	13	19
	551	64	9	22	36
	552	45	5	17	72
	553	41	4	29	21
	554	21	58	32	36
	555	35	1	12	21
	556	39	12	18	14
	557	27	14	5	34
	558	33	44	22	72
	559	27	59	22	22
	560	43	12	29	22
	561	15	12	14	51
	562	36	7	28	26
	563	20	41	3	48
	564	14	32	11	66
	565	30	23	8	34
	566	27	7	31	29
	567	7	30	33	54
	568	45	34	5	21
	569	19	24	2	54
	570	5	20	6	38
	571	19	24	18	55
	572	14	17	10	30
	573	17	49	25	15
	574	11	63	31	85
	575	29	23	19	122
	576	12	33	30	22
	577	33	46	22	20
	578	50	44	31	32
	579	38	36	42	27
	580	42	32	57	39
	581	76	11	16	41
	582	24	41	18	56
	583	82	46	18	19
	584	26	47	16	46
	585	18	36	32	36
	586	19	7	12	61
	587	25	26	38	86
	588	26	12	22	23
	589	26	15	12	38
	590	28	4	10	14
	591	15	45	25	23
	592	8	17	98	22
	593	84	35	28	107
	594	37	21	10	74
	595	47	12	26	40
	596	36	3	40	97
	597	71	11	35	47
	598	43	27	41	7
	599	60	11	42	5
	600	30	25	3	61
