# Supplementary material for: KAT2-mediated acetylation switches the mode of PALB2 chromatin association to safeguard genome integrity
Source: eLife. 2022 Oct 21;11:e57736. doi: 10.7554/eLife.57736 (PMC9671498; doi:10.7554/eLife.57736)
Supplement: Figure 9—source data 1. [file elife-57736-fig9-data1.xlsx]

## Sheet: Sheet1
	EV repeat 1:		EV (untreated except +/-dox)
		450 nm	1	2	3	4	5	6	7	8	9	10	11	12	650 nm	1	2	3	4	5	6	7	8	9	10	11
		dox	0.8404	0.7583	0.6989	0.6602	0.6679	0.6187	0.0483	0.0488	0.0488	0.0496	0.0492	0.0496		0.0536	0.0558	0.0558	0.054	0.0546	0.0514	0.0421	0.0427	0.0427	0.0433	0.043
		dox	0.9177	0.8162	0.7197	0.6597	0.6313	0.6125	0.0477	0.0481	0.0481	0.0482	0.048	0.0492		0.0534	0.0573	0.0561	0.0572	0.0553	0.0542	0.0408	0.0416	0.0415	0.0419	0.0414
		dox	0.8773	0.8716	0.7405	0.7348	0.6398	0.6091	0.0477	0.048	0.0483	0.0484	0.0479	0.0494		0.0547	0.0603	0.0587	0.057	0.0563	0.056	0.0408	0.0411	0.0416	0.0419	0.0411
		no dox	1.9523	1.9299	2.1589	2.3336	2.0176	1.3243	0.049	0.0476	0.051	0.0484	0.0484	0.0494		0.0532	0.0559	0.0563	0.0562	0.0555	0.0543	0.0423	0.0407	0.0445	0.0416	0.0417
		no dox	1.9591	2.0651	2.2042	2.2604	2.0952	1.298	0.0485	0.048	0.0478	0.0487	0.0478	0.0497		0.0551	0.0561	0.0577	0.0563	0.0555	0.0553	0.0416	0.0409	0.0412	0.0418	0.0407
		no dox	1.7774	1.7949	1.9331	1.7931	1.6764	1.2675	0.0482	0.0483	0.0479	0.0484	0.0481	0.0494		0.0528	0.0542	0.0559	0.0553	0.0543	0.0545	0.0412	0.0412	0.0406	0.0412	0.0414
	WST-1 reagent only		0.2165	0.2162	0.2132	0.0483	0.0473	0.0479	0.0481	0.048	0.0483	0.0485	0.048	0.0498		0.0484	0.0484	0.0476	0.0412	0.0403	0.0406	0.041	0.0406	0.0411	0.0412	0.0408
			0.0503	0.0497	0.0488	0.0485	0.0484	0.0481	0.0488	0.0487	0.049	0.0495	0.0493	0.0496		0.0431	0.0428	0.0424	0.0416	0.0424	0.0417	0.0421	0.0421	0.0435	0.0429	0.0422
			EV (untreated except +/-dox)
	450-650 nm		0.7868
			0.8643
			0.8226
			1.8991
			1.904
			1.7246
Wells for subtraction			0.1681	0.1678	0.1656
Background for subtraction			0.167167
			EV (untreated except +/-dox)
		dox	0.619633
		dox	0.697133
		dox	0.655433
		no dox	1.73193
		no dox	1.73683
		no dox	1.55743
		WT repeat 1
		WT (untreated except +/-dox)
	450 nm	1	2	3	4	5	6	7	8	9	10	11	12	650 nm	1	2	3	4	5	6	7	8	9	10	11	12
	dox	1.9652	2.327	2.4495	2.3177	2.1058	1.8839	0.0486	0.0488	0.0488	0.0495	0.0491	0.0495		0.0629	0.0589	0.0598	0.0589	0.0569	0.0566	0.0425	0.0427	0.0424	0.0428	0.0428	0.0432
	dox	2.0539	2.4703	2.432	2.3645	2.1716	1.7316	0.0491	0.0483	0.0488	0.0483	0.0484	0.0494		0.0602	0.061	0.0599	0.0626	0.0608	0.0595	0.0419	0.0414	0.0421	0.0417	0.0415	0.0431
	dox	2.24	2.5289	2.4841	2.4023	2.3126	1.5757	0.0497	0.0489	0.0482	0.0489	0.0487	0.0496		0.0576	0.0593	0.0603	0.0619	0.0608	0.0591	0.0422	0.0423	0.0413	0.0423	0.0418	0.0432
	no dox	2.215	2.2227	2.4266	2.6878	2.7083	2.1237	0.0512	0.0491	0.0486	0.0525	0.0485	0.0495		0.0577	0.0609	0.0603	0.063	0.0586	0.0569	0.044	0.0423	0.0417	0.0443	0.0416	0.0431
	no dox	2.2005	2.2107	2.4957	2.6017	2.529	1.9981	0.0601	0.0486	0.0484	0.0501	0.0487	0.0496		0.0609	0.0625	0.0586	0.067	0.0595	0.0573	0.0503	0.0415	0.0414	0.0427	0.0415	0.043
	no dox	2.0185	2.2491	2.3417	2.3541	2.3289	1.9813	0.0504	0.0481	0.0483	0.0513	0.0486	0.0497		0.0583	0.0627	0.0599	0.0629	0.0601	0.0576	0.0429	0.041	0.0413	0.0431	0.0414	0.0428
WST-1 reagent only		0.2083	0.2106	0.2072	0.0487	0.0488	0.0536	0.0489	0.0572	0.0485	0.0488	0.0482	0.0496		0.0494	0.0501	0.0483	0.0416	0.0414	0.0454	0.0413	0.0481	0.0411	0.0413	0.0411	0.0426
		0.0503	0.0502	0.0496	0.0492	0.0492	0.0542	0.0504	0.0507	0.0493	0.0498	0.0495	0.0498		0.0438	0.0432	0.044	0.0426	0.0423	0.0455	0.0432	0.0434	0.0421	0.0428	0.0436	0.0428
450-650 nm
		WT (untreated except +/-dox)
	dox	1.9023
	dox	1.9937
	dox	2.1824
	no dox	2.1573
	no dox	2.1396
	no dox	1.9602
WST-1 reagent only		0.1589	0.1605	0.1589
Background for subtraction
		0.159433
		WT (untreated except +/-dox)
	dox	1.74287
	dox	1.83427
	dox	2.02297
	no dox	1.99787
	no dox	1.98017
	no dox	1.80077
	7Q repeat 1
		WT (untreated except +/-dox)
	450 nm	1	2	3	4	5	6	7	8	9	10	11	12	650 nm	1	2	3	4	5	6	7	8	9	10	11	12
	dox	1.1995	1.3502	1.3582	1.3304	1.1262	0.9243	0.0488	0.0487	0.0487	0.0505	0.0492	0.049		0.0551	0.0552	0.0582	0.0544	0.0516	0.0537	0.043	0.043	0.0428	0.0446	0.0434	0.0432
	dox	1.2984	1.5152	1.55	1.3456	1.4167	1.012	0.0488	0.0485	0.0491	0.041	0.0401	0.041		0.078	0.0552	0.0563	0.0528	0.0541	0.054	0.0424	0.0421	0.0427	0.0333	0.0324	0.0327
	dox	1.2926	1.4176	1.551	1.5184	1.4073	1.0292	0.0416	0.0447	0.0425	0.0404	0.0405	0.0403		0.0509	0.0602	0.0667	0.0529	0.0568	0.0581	0.0325	0.0352	0.0335	0.033	0.0329	0.0339
	no dox	1.9232	1.9455	2.0714	1.8294	1.9846	1.6333	0.0451	0.0514	0.0422	0.041	0.0407	0.0418		0.0529	0.0572	0.0588	0.0585	0.0605	0.0625	0.0362	0.0408	0.0339	0.0329	0.0328	0.0347
	no dox	1.8457	1.9808	1.9247	1.7926	1.8708	1.4491	0.0459	0.0417	0.044	0.0414	0.0401	0.0403		0.0537	0.0636	0.0558	0.0639	0.0591	0.0578	0.0358	0.033	0.0344	0.0331	0.0323	0.0331
	no dox	1.8698	1.9557	1.8516	1.92	1.8465	1.4562	0.0411	0.0426	0.0404	0.0424	0.0406	0.0403		0.1187	0.0741	0.0679	0.0576	0.0558	0.0545	0.0322	0.0328	0.032	0.0338	0.0326	0.0331
WST-1 reagent only		0.1871	0.1987	0.1899	0.043	0.0407	0.0502	0.042	0.0411	0.0415	0.0415	0.0411	0.0407		0.0487	0.055	0.0491	0.0376	0.0335	0.0416	0.033	0.0317	0.0325	0.0326	0.0329	0.0333
		0.0503	0.0397	0.0511	0.0393	0.0396	0.0397	0.0413	0.0451	0.0409	0.0406	0.0403	0.0438		0.0438	0.0336	0.0452	0.0326	0.0336	0.0333	0.0339	0.0366	0.0328	0.0333	0.0332	0.036
450-650 nm
		7Q (untreated except +/-dox)
	dox	1.1444
	dox	1.2204
	dox	1.2417
	no dox	1.8703
	no dox	1.792
	no dox	1.7511
WST-1 reagent only		0.1384	0.1437	0.1408
Background for subtraction
		0.140967
		7Q (untreated except +/-dox)
	dox	1.00343
	dox	1.07943
	dox	1.10073
	no dox	1.72933
	no dox	1.65103
	no dox	1.61013
	7R repeat 1
		7R (untreated except +/-dox)
	450 nm	1	2	3	4	5	6	7	8	9	10	11	12	650 nm	1	2	3	4	5	6	7	8	9	10	11	12
	dox	0.7877	1.045	0.9103	0.9036	0.7732	0.7182	0.0482	0.0489	0.0545	0.0497	0.0489	0.0495		0.0521	0.052	0.0517	0.051	0.0512	0.0514	0.0425	0.0432	0.0475	0.0434	0.0428	0.0441
	dox	0.9166	1.1298	1.0906	1.0913	0.9332	0.7201	0.0497	0.0482	0.049	0.0483	0.0483	0.0491		0.0517	0.054	0.0537	0.0557	0.0549	0.0542	0.043	0.0416	0.0426	0.0421	0.0419	0.0436
	dox	0.9228	1.1077	1.0915	1.0958	0.974	0.725	0.0484	0.0482	0.0487	0.0479	0.0483	0.0492		0.0532	0.0553	0.0539	0.0545	0.0543	0.0525	0.0413	0.0414	0.042	0.0419	0.0418	0.0435
	no dox	1.5412	1.5017	1.5055	1.726	1.7075	1.3023	0.0495	0.0482	0.0481	0.0481	0.0482	0.0497		0.0527	0.0528	0.0529	0.0536	0.0545	0.0536	0.0429	0.0415	0.0417	0.0418	0.042	0.0438
	no dox	1.4643	1.4415	1.5153	1.5855	1.4598	1.1925	0.0487	0.0483	0.0482	0.0483	0.0478	0.0495		0.0535	0.0535	0.0533	0.0543	0.0546	0.0536	0.042	0.0415	0.0416	0.0418	0.0413	0.0435
	no dox	1.4978	1.4825	1.4117	1.4435	1.2898	1.1046	0.0482	0.0483	0.0479	0.0482	0.048	0.0494		0.0518	0.0532	0.0516	0.052	0.0528	0.0531	0.0415	0.0415	0.0406	0.0414	0.0415	0.0433
WST-1 reagent only		0.2071	0.2073	0.2048	0.0489	0.0476	0.048	0.0485	0.0485	0.048	0.0483	0.0481	0.0497		0.0483	0.0486	0.0479	0.0422	0.0408	0.0409	0.0415	0.0413	0.0411	0.0411	0.041	0.0434
		0.0496	0.0495	0.0488	0.0487	0.0483	0.0481	0.0492	0.0494	0.0496	0.0495	0.0496	0.0495		0.0424	0.043	0.0425	0.0424	0.0432	0.042	0.0437	0.0429	0.0433	0.0429	0.0439	0.0431
450-650 nm
		7R (untreated except +/-dox)
	dox	0.7356
	dox	0.8649
	dox	0.8696
	no dox	1.4885
	no dox	1.4108															Normalized ratio
	no dox	1.446															From old repeats (non-variants/see above)
WST-1 reagent only		0.1588	0.1587	0.1569															EV (dox/no dox)		WT (dox/no dox)		7Q (dox/no dox)		7R (dox/no dox)
																	Repeat 1		0.392384		0.969077		0.637932		0.515565
Background for subtraction
		0.158133
		7R (untreated except +/-dox)
	dox	0.577467
	dox	0.706767
	dox	0.711467
	no dox	1.33037
	no dox	1.25267
	no dox	1.28787
	WST-1 variant repeat 1
				EV (untreated except +/-dox)		WT (untreated except +/-dox)		7Q (untreated except +/-dox)		7R (untreated except +/-dox)
				1	2	3	4	5	6	7	8	9	10	11	12		1	2	3	4	5	6	7	8	9	10	11	12
			dox	1.1561	0.0488	2.6764	0.0481	1.9059	0.0485	1.2704	0.0478	0.0478	0.0483	0.0481	0.0485		0.0507	0.0434	0.0566	0.0431	0.0496	0.0433	0.0515	0.0427	0.0426	0.043	0.0427	0.0431
			dox	1.5979	0.0469	2.8768	0.0474	2.2598	0.0461	1.5613	0.0467	0.0469	0.0457	0.0463	0.0482		0.055	0.0408	0.0558	0.0414	0.0509	0.0403	0.0531	0.0407	0.0409	0.0406	0.0403	0.0429
			dox	1.761	0.0474	3.0113	0.0473	2.4197	0.047	1.7978	0.0461	0.0458	0.0458	0.0465	0.05		0.054	0.0413	0.0576	0.0412	0.0524	0.0408	0.0522	0.0401	0.0397	0.0399	0.0402	0.0445
			no dox	3.1962	0.0473	3.2563	0.0473	3.2028	0.0477	3.2487	0.0466	0.0455	0.0467	0.0475	0.048		0.0589	0.041	0.058	0.0415	0.0559	0.042	0.0526	0.0408	0.0395	0.0404	0.0412	0.0429
			no dox	2.8461	0.0468	3.2339	0.0477	3.1681	0.0473	3.1789	0.0469	0.0461	0.0466	0.0459	0.0479		0.0614	0.041	0.0624	0.0419	0.0523	0.0417	0.0628	0.0405	0.04	0.0399	0.0396	0.0424
			no dox	3.2007	0.0376	3.3066	0.0473	3.1919	0.0472	3.1448	0.047	0.0589	0.0466	0.0485	0.0484		0.0578	0.0316	0.0599	0.041	0.0522	0.041	0.0537	0.0405	0.0503	0.0398	0.0414	0.0426
		WST-1 reagent only		0.2297	0.2308	0.229	0.0472	0.0473	0.0471	0.0466	0.047	0.047	0.0466	0.0481	0.0503		0.0433	0.0434	0.0421	0.0407	0.0406	0.0405	0.0405	0.0403	0.0403	0.04	0.0411	0.0436
				0.0495	0.0827	0.0476	0.0477	0.0479	0.0486	0.0477	0.0478	0.0504	0.0484	0.0486	0.0483		0.0423	0.0687	0.0422	0.0418	0.0419	0.0429	0.0434	0.0419	0.0433	0.0422	0.0421	0.0421
				EV		WT		7Q		7R
	450-650 nm		dox	1.1054		2.6198		1.8563		1.2189
			dox	1.5429		2.821		2.2089		1.5082
			dox	1.707		2.9537		2.3673		1.7456
			no dox	3.1373		3.1983		3.1469		3.1961
			no dox	2.7847		3.1715		3.1158		3.1161
			no dox	3.1429		3.2467		3.1397		3.0911
		WST-1 reagent only		0.1864	0.1874	0.1869
	Background for subtraction			0.1869
												Normalized ratio
				EV		WT		7Q		7R		EV (dox/no dox)		WT (dox/no dox)		7Q (dox/no dox)		7R (dox/no dox)
			dox	0.9185		2.4329		1.6694		1.032		0.446203		0.865059		0.664103		0.442404
			dox	1.356		2.6341		2.022		1.3213
			dox	1.5201		2.7668		2.1804		1.5587
			no dox	2.9504		3.0114		2.96		3.0092
			no dox	2.5978		2.9846		2.9289		2.9292
			no dox	2.956		3.0598		2.9528		2.9042
	WST-1 variant repeat 3
				EV (untreated except +/-dox)		WT (untreated except +/-dox)		7Q (untreated except +/-dox)		7R (untreated except +/-dox)
				1	2	3	4	5	6	7	8	9	10	11	12		1	2	3	4	5	6	7	8	9	10	11	12
			dox	1.1548	0.0482	1.9402	0.0476	1.683	0.0475	0.9221	0.0471	0.0471	0.0473	0.047	0.0474		0.0533	0.0435	0.0523	0.0432	0.05	0.0431	0.0478	0.0427	0.0428	0.0429	0.0425	0.0431
			dox	1.2228	0.0466	1.8061	0.0469	1.7411	0.0464	0.9688	0.0459	0.0446	0.0453	0.0455	0.0472		0.0576	0.0413	0.0552	0.0418	0.0507	0.0413	0.0484	0.0406	0.0396	0.0405	0.0407	0.0429
			dox	1.1857	0.0465	1.7992	0.0459	1.6908	0.0455	1.0091	0.0455	0.045	0.045	0.0457	0.0471		0.059	0.0414	0.0546	0.0405	0.0507	0.0403	0.0509	0.0402	0.0396	0.04	0.0406	0.0428
			no dox	2.2303	0.0464	2.4525	0.0456	2.3998	0.0466	1.7357	0.046	0.045	0.0452	0.0454	0.0472		0.0547	0.0412	0.0507	0.0402	0.0512	0.0416	0.0491	0.041	0.0396	0.0399	0.0405	0.0428
			no dox	2.3731	0.0468	2.4119	0.046	2.3815	0.0461	1.6645	0.0459	0.0454	0.0454	0.0457	0.0474		0.0541	0.0417	0.0505	0.0405	0.0505	0.0411	0.0478	0.0407	0.0402	0.0401	0.04	0.0426
			no dox	1.5511	0.0472	2.4907	0.0465	2.4622	0.0461	1.6376	0.0456	0.0449	0.0456	0.046	0.0533		0.0451	0.0419	0.0514	0.0411	0.0487	0.0403	0.0477	0.0402	0.0395	0.0405	0.0407	0.0466
		WST-1 reagent only		0.1965	0.2018	0.2051	0.0464	0.0458	0.046	0.0458	0.0468	0.0456	0.0453	0.0451	0.048		0.0444	0.0451	0.0457	0.0407	0.0398	0.0401	0.04	0.041	0.0402	0.0399	0.0397	0.0429
				0.0474	0.0471	0.0472	0.0479	0.0469	0.0467	0.0471	0.0477	0.0467	0.0469	0.0471	0.0555		0.0421	0.0421	0.0429	0.0425	0.0417	0.0416	0.0421	0.0424	0.0417	0.0418	0.042	0.0474
				EV		WT		7Q		7R
	450-650 nm		dox	1.1015		1.8879		1.633		0.8743
			dox	1.1652		1.7509		1.6904		0.9204
			dox	1.1267		1.7446		1.6401		0.9582
			no dox	2.1756		2.4018		2.3486		1.6866
			no dox	2.319		2.3614		2.331		1.6167
			no dox	1.506		2.4393		2.4135		1.5899
		WST-1 reagent only		0.1521	0.1567	0.1594
	Background for subtraction			0.156067
												Normalized ratio
				EV		WT		7Q		7R		EV (dox/no dox)		WT (dox/no dox)		7Q (dox/no dox)		7R (dox/no dox)
			dox	0.945433		1.73183		1.47693		0.718233		0.52874		0.729875		0.678546		0.516316
			dox	1.00913		1.59483		1.53433		0.764333
			dox	0.970633		1.58853		1.48403		0.802133
			no dox	2.01953		2.24573		2.19253		1.53053
			no dox	2.16293		2.20533		2.17493		1.46063
			no dox	1.34993		2.28323		2.25743		1.43383
