# Supplementary material for: KAT2-mediated acetylation switches the mode of PALB2 chromatin association to safeguard genome integrity
Source: eLife. 2022 Oct 21;11:e57736. doi: 10.7554/eLife.57736 (PMC9671498; doi:10.7554/eLife.57736)
Supplement: Figure 9—source data 2. [file elife-57736-fig9-data2.xlsx]

## Sheet: 9D -Compilation Flag-IgG ratios
ChIP Flag/igG ratios
Beta-Actin_in3
	UNTREATED			IR
	Trial 1	Trial 2	Trial 3	Trial 1	Trial 2	Trial 3
EV	0.732893	2.77574	2.56813	0.638299	5.25826	2.64539
WT	8.22104	10.6873	7.3268	0.444743	5.89363	2.25197
7Q	1.3581	1.5594	3.0923	1.91393	1.97183	5.84587
7R	3.29347	4.24855	2.69422	1.30679	2.5529	5.55624
Chr5_TCOF1_peak2
	UNTREATED			IR
	Trial 1	Trial 2	Trial 3	Trial 1	Trial 2	Trial 3
EV	1.14695	3.37753	2.35116	0.630782	4.20406	2.30998
WT	8.54735	7.77434	9.86512	0.455617	5.37365	2.4673
7Q	1.99883	0.957556	2.67962	1.35531	1.60634	6.51261
7R	2.29148	3.95688	2.29499	0.899539	2.60476	4.89696
Chr11_WEE1_mid
	UNTREATED			IR
	Trial 1	Trial 2	Trial 3	Trial 1	Trial 2	Trial 3
EV	0.7394	3.8599	3.44115	0.792446	5.20608	2.41925
WT	8.18989	10.9391	9.25291	0.407668	6.27971	2.60933
7Q	1.55306	0.899167	2.46144	1.7643	2.19306	6.70905
7R	3.18897	3.88765	2.71236	0.929568	3.25028	6.20547

## Sheet: Trial 1 Ct values
TRIAL 1	Ct VALUES
		Beta-Actin_in3
		Ct									Average Ct			Ct INPUT adjusted	Δ Ct		% Input		Ratio
															Ct[INPUT adjusted]-Ct[IP]		(2^∆Ct)x100%
		INPUT 1%			IP igG			IP Flag			INPUT 1%	IP igG	IP Flag	Ct INPUT1%- log2(100)	IP igG	IP Flag	IP igG	IP Flag	Flag/igG
		Ct 1	Ct 2	Ct 3	Ct 1	Ct 2	Ct 3	Ct 1	Ct 2	Ct 3
UNTREATED	EV	23.6818	23.4398	23.4873	29.9118	30.6163	30.6854	30.8308	31.05	30.6777	23.5363	30.4045	30.8528	16.8925	-13.5121	-13.9604	0.0085598	0.00627342	0.732893
	WT	21.1671	21.2367	21.3903	29.0755	28.706	29.2017	25.9851	25.826	26.0541	21.2647	28.9944	25.955	14.6209	-14.3735	-11.3342	0.00471133	0.038732	8.22104
	7Q	21.532	21.5925	21.541	26.4127	26.9409	27.249	26.3043	26.6664	26.3071	21.5552	26.8675	26.4259	14.9113	-11.9562	-11.5146	0.0251669	0.0341792	1.3581
	7R	21.6689	21.5877	21.534	28.1769	29.0253	29.3769	27.1547	27.2663	26.9992	21.5968	28.8597	27.1401	14.953	-13.9067	-12.1871	0.00651117	0.0214443	3.29347
IR, 4Gy	EV	23.1503	22.9115	23.3694	29.6181	29.0448	30.0622	30.9734	29.7067	29.9882	23.1437	29.575	30.2227	16.4999	-13.0752	-13.7229	0.0115874	0.00739621	0.638299
	WT	21.816	21.6743	21.7194	27.0557	26.917	27.2946	28.2157	28.1042	28.4543	21.7366	27.0891	28.2581	15.0927	-11.9964	-13.1654	0.0244751	0.0108851	0.444743
	7Q	21.6102	21.5743	21.6051	28.4138	28.8231	28.7384	27.5506	27.6607	27.9544	21.5965	28.6585	27.7219	14.9527	-13.7058	-12.7693	0.00748418	0.0143242	1.91393
	7R	21.7182	21.6831	21.9543	28.0476	28.6422	28.5384	28.2007	28.0345	27.835	21.7852	28.4094	28.0234	15.1413	-13.2681	-12.8821	0.0101369	0.0132468	1.30679
		Chr5_TCOF1_peak2
		Ct									Average Ct			Ct INPUT adjusted	Δ Ct		% Input		Ratio
															Ct[INPUT adjusted]-Ct[IP]		(2^∆Ct)x100%
		INPUT 1%			IP igG			IP Flag			INPUT 1%	IP igG	IP Flag	Ct INPUT1%- log2(100)	IP igG	IP Flag	IP igG	IP Flag	Flag/igG
		Ct 1	Ct 2	Ct 3	Ct 1	Ct 2	Ct 3	Ct 1	Ct 2	Ct 3
UNTREATED	EV	22.9102	22.4149	23.0583	29.5107	30.1832	30.7881	30.1819	29.6244	30.0824	22.7945	30.1607	29.9629	16.1506	-14.0101	-13.8123	0.00606114	0.0069518	1.14695
	WT	21.3643	20.925	20.6276	28.1043	27.9756	28.3638	24.7635	24.932	25.4617	20.9723	28.1479	25.0524	14.3285	-13.8194	-10.7239	0.00691742	0.0591256	8.54735
	7Q	20.8434	20.6852	20.8527	25.7551	25.9464	26.5587	24.6807	25.3073	25.2746	20.7938	26.0867	25.0875	14.1499	-11.9368	-10.9376	0.0255075	0.0509852	1.99883
	7R	21.0231	20.9823	21.2276	27.7881	27.8886	28.041	26.6278	26.9808	26.5203	21.0777	27.9059	26.7096	14.4338	-13.4721	-12.2758	0.00880024	0.0201655	2.29148
IR, 4Gy	EV	21.9952	22.3843	22.4215	28.119	28.8072	29.0813	29.1701	29.3504	29.4813	22.267	28.6692	29.3339	15.6231	-13.046	-13.7108	0.0118237	0.0074582	0.630782
	WT	20.6042	20.9497	21.1161	25.5839	26.4563	26.615	26.7608	27.6338	27.6629	20.89	26.2184	27.3525	14.2461	-11.9723	-13.1064	0.0248882	0.0113395	0.455617
	7Q	20.9653	20.7837	20.9861	27.0384	27.8567	27.7907	26.7854	27.1451	27.4394	20.9117	27.5619	27.1233	14.2678	-13.2941	-12.8555	0.00995588	0.0134933	1.35531
	7R	21.4281	21.3732	21.2709	27.3371	27.3002	27.8349	27.3345	27.9247	27.6712	21.3574	27.4907	27.6435	14.7135	-12.7772	-12.9299	0.0142456	0.0128145	0.899539
		Chr11_WEE1_mid
		Ct									Average Ct			Ct INPUT adjusted	Δ Ct		% Input		Ratio
															Ct[INPUT adjusted]-Ct[IP]		(2^∆Ct)x100%
		INPUT 1%			IP igG			IP Flag			INPUT 1%	IP igG	IP Flag	Ct INPUT1%- log2(100)	IP igG	IP Flag	IP igG	IP Flag	Flag/igG
		Ct 1	Ct 2	Ct 3	Ct 1	Ct 2	Ct 3	Ct 1	Ct 2	Ct 3
UNTREATED	EV	24.2724	24.0304	24.0945	31.2278	31.2016	30.9797	31.9781	31.7798	30.9579	24.1324	31.1364	31.5719	17.4886	-13.6478	-14.0834	0.00779108	0.00576072	0.7394
	WT	22.1619	22.3076	22.5277	29.585	29.8713	29.7485	26.6464	26.7238	26.733	22.3324	29.7349	26.7011	15.6885	-14.0464	-11.0125	0.00591037	0.0484053	8.18989
	7Q	22.3159	22.3766	22.4126	27.4356	27.4968	27.6163	26.7577	26.9526	26.9329	22.3684	27.5162	26.8811	15.7245	-11.7917	-11.1566	0.0282057	0.0438053	1.55306
	7R	22.5009	22.5388	22.4478	29.8435	29.7776	29.3046	28.1237	27.7157	28.0669	22.4958	29.6419	27.9688	15.852	-13.7899	-12.1168	0.00706022	0.0225148	3.18897
IR, 4Gy	EV	23.6843	23.7192	23.7176	30.0572	30.2011	30.4282	30.3986	30.736	30.5587	23.707	30.2288	30.5644	17.0632	-13.1656	-13.5012	0.010883	0.0086242	0.792446
	WT	22.6532	22.5328	22.6708	27.9227	27.8935	27.6481	29.0401	29.3031	29.0048	22.6189	27.8214	29.116	15.9751	-11.8464	-13.1409	0.0271575	0.0110712	0.407668
	7Q	22.3514	22.4627	22.4654	29.4138	29.2637	29.509	28.8831	28.494	28.3521	22.4265	29.3955	28.5764	15.7826	-13.6129	-12.7938	0.00798211	0.0140829	1.7643
	7R	22.5293	22.5903	22.6427	29.0248	28.794	29.034	29.1451	28.9719	29.0519	22.5874	28.9509	29.0563	15.9436	-13.0073	-13.1127	0.012145	0.0112896	0.929568

## Sheet: Trial 2 Ct values
TRIAL 2	Ct VALUES
		Beta-Actin_in3
		Ct									Average Ct			Ct INPUT adjusted	Δ Ct		% Input		Ratio
															Ct[INPUT adjusted]-Ct[IP]		(2^∆Ct)x100%
		INPUT 1%			IP igG			IP Flag			INPUT 1%	IP igG	IP Flag	Ct INPUT1%- log2(100)	IP igG	IP Flag	IP igG	IP Flag	Flag/igG
		Ct 1	Ct 2	Ct 3	Ct 1	Ct 2	Ct 3	Ct 1	Ct 2	Ct 3
UNTREATED	EV	21.8035	22.1061	21.9351	28.2532	28.3637	28.2565	26.6165	26.83	27.0084	21.9482	28.2912	26.8183	15.3044	-12.9868	-11.5139	0.0123194	0.0341954	2.77574
	WT	21.1388	21.4156	21.4728	30.0451	29.4775	29.7841	26.0923	26.496	26.4649	21.3424	29.7689	26.3511	14.6986	-15.0704	-11.6525	0.00290651	0.0310627	10.6873
	7Q	20.9965	20.9757	21.0602	27.6582	27.5563	27.7221	26.599	26.9047	27.5099	21.0108	27.6456	27.0046	14.3669	-13.2786	-12.6376	0.0100631	0.0156924	1.5594
	7R	21.4723	21.7458	21.7726	27.9019	28.8434	29.3512	26.242	26.5526	27.0411	21.6636	28.6989	26.6119	15.0197	-13.6791	-11.5922	0.00762377	0.0323899	4.24855
IR, 4Gy	EV	21.7189	21.5932	21.7659	28.654	28.5541	28.2801	25.7711	26.1912	26.3422	21.6927	28.4961	26.1015	15.0488	-13.4473	-11.0527	0.00895309	0.0470777	5.25826
	WT	21.1127	21.3297	21.4426	28.5733	28.5386	29.1778	26.0016	26.3817	26.2289	21.295	28.7632	26.2041	14.6511	-14.1121	-11.5529	0.00564723	0.0332827	5.89363
	7Q	20.5845	20.9792	20.8578	26.0015	25.797	26.3162	24.9982	25.0557	25.1221	20.8072	26.0382	25.0587	14.1633	-11.8749	-10.8954	0.0266251	0.0525002	1.97183
	7R	21.2907	21.3469	21.3492	27.2382	27.2812	27.5502	25.6603	25.9406	26.4123	21.3289	27.3565	26.0044	14.685	-12.6715	-11.3194	0.0153285	0.0391322	2.5529
		Chr5_TCOF1_peak2
		Ct									Average Ct			Ct INPUT adjusted	Δ Ct		% Input		Ratio
															Ct[INPUT adjusted]-Ct[IP]		(2^∆Ct)x100%
		INPUT 1%			IP igG			IP Flag			INPUT 1%	IP igG	IP Flag	Ct INPUT1%- log2(100)	IP igG	IP Flag	IP igG	IP Flag	Flag/igG
		Ct 1	Ct 2	Ct 3	Ct 1	Ct 2	Ct 3	Ct 1	Ct 2	Ct 3
UNTREATED	EV	21.4258	21.4716	21.9739	28.2485	28.3762	28.1685	26.588	26.371	26.5664	21.6238	28.2644	26.5085	14.9799	-13.2845	-11.5286	0.0100221	0.0338498	3.37753
	WT	20.6802	20.9598	21.0293	29.4328	29.3099	29.0869	26.3319	26.3289	26.2926	20.8898	29.2765	26.3178	14.2459	-15.0306	-12.0719	0.00298765	0.023227	7.77434
	7Q	20.2045	20.6166	20.4848	26.9965	27.0293	26.984	27.1406	27.0525	27.0043	20.4353	27.0033	27.0658	13.7914	-13.2118	-13.2744	0.01054	0.0100927	0.957556
	7R	21.1491	21.1475	21.2151	28.3058	28.5149	28.1764	26.4096	26.2462	26.3882	21.1705	28.3324	26.348	14.5267	-13.8057	-11.8213	0.00698348	0.0276328	3.95688
IR, 4Gy	EV	20.9234	21.1955	21.2444	28.1712	28.0435	28.2654	26.0519	26.0027	26.2101	21.1211	28.16	26.0883	14.4772	-13.6828	-11.611	0.00760449	0.0319697	4.20406
	WT	20.9192	21.0075	20.9207	28.4012	28.8853	28.6289	26.1193	26.3749	26.1436	20.9491	28.6385	26.2126	14.3053	-14.3332	-11.9073	0.00484475	0.026034	5.37365
	7Q	20.6194	20.5442	20.5509	25.5848	26.0042	25.6512	25.0427	25.0392	25.1071	20.5715	25.7468	25.063	13.9277	-11.8191	-11.1353	0.0276756	0.0444565	1.60634
	7R	20.9944	21.001	20.9905	27.5813	27.5358	27.2007	26.217	25.9865	25.9708	20.9953	27.4393	26.0581	14.3515	-13.0878	-11.7066	0.0114863	0.029919	2.60476
		Chr11_WEE1_mid
		Ct									Average Ct			Ct INPUT adjusted	Δ Ct		% Input		Ratio
															Ct[INPUT adjusted]-Ct[IP]		(2^∆Ct)x100%
		INPUT 1%			IP igG			IP Flag			INPUT 1%	IP igG	IP Flag	Ct INPUT1%- log2(100)	IP igG	IP Flag	IP igG	IP Flag	Flag/igG
		Ct 1	Ct 2	Ct 3	Ct 1	Ct 2	Ct 3	Ct 1	Ct 2	Ct 3
UNTREATED	EV	22.9113	22.6985	22.7984	29.6018	29.3637	29.275	27.4584	27.3684	27.568	22.8027	29.4135	27.4649	16.1589	-13.2546	-11.306	0.0102321	0.039495	3.8599
	WT	22.2253	22.1886	22.4572	30.6247	31.0372	30.8345	27.3318	27.3434	27.467	22.2904	30.8321	27.3807	15.6465	-15.1856	-11.7342	0.00268338	0.0293536	10.9391
	7Q	21.9353	21.9845	21.9307	28.5484	28.8992	27.0233	28.2698	Undetermined	28.3509	21.9502	28.157	28.3103	15.3063	-12.8507	-13.004	0.0135384	0.0121732	0.899167
	7R	22.2425	22.6168	22.6307	29.5052	29.4548	29.4151	27.3397	27.5045	27.6543	22.4967	29.4584	27.4995	15.8528	-13.6056	-11.6467	0.0080227	0.0311895	3.88765
IR, 4Gy	EV	22.1377	22.1162	22.2708	29.6556	29.2973	29.648	26.9809	27.3439	27.1355	22.1749	29.5336	27.1534	15.531	-14.0026	-11.6224	0.00609251	0.0317181	5.20608
	WT	22.3443	22.0317	22.1322	29.8392	29.9768	30.0113	27.2336	27.5056	27.136	22.1694	29.9424	27.2917	15.5256	-14.4169	-11.7662	0.00457182	0.0287097	6.27971
	7Q	22.0519	22.0972	22.0589	27.6138	27.3079	27.3283	26.1065	26.3215	26.4232	22.0693	27.4167	26.2837	15.4255	-11.9912	-10.8582	0.0245636	0.0538694	2.19306
	7R	22.2449	22.1658	22.376	29.1171	28.9781	29.1559	27.2208	27.556	27.3725	22.2622	29.0837	27.3831	15.6184	-13.4653	-11.7647	0.0088418	0.0287383	3.25028

## Sheet: Trial 3 Ct values
TRIAL 3	Ct VALUES
		Beta-Actin_in3
		Ct									Average Ct			Ct INPUT adjusted	Δ Ct		% Input		Ratio
															Ct[INPUT adjusted]-Ct[IP]		(2^∆Ct)x100%
		INPUT 1%			IP igG			IP Flag			INPUT 1%	IP igG	IP Flag	Ct INPUT1%- log2(100)	IP igG	IP Flag	IP igG	IP Flag	Flag/igG
		Ct 1	Ct 2	Ct 3	Ct 1	Ct 2	Ct 3	Ct 1	Ct 2	Ct 3
UNTREATED	EV	21.9462	21.9031	22.4085	28.8339	28.7514	28.9222	27.3824	27.668	27.3749	22.0859	28.8358	27.4751	15.4421	-13.3938	-12.033	0.00929132	0.0238614	2.56813
	WT	21.6778	21.5633	21.5842	30.2646	29.9331	30.2512	27.3596	27.1696	27.3002	21.6084	30.1496	27.2765	14.9646	-15.1851	-12.3119	0.00268436	0.0196677	7.3268
	7Q	21.4935	21.2595	21.3173	28.8045	28.6071	28.7446	27.2276	26.9087	27.1339	21.3567	28.7187	27.0901	14.7129	-14.0059	-12.3772	0.00607873	0.0187973	3.0923
	7R	21.241	21.5896	21.8101	28.5893	28.6448	28.7868	27.1442	27.1198	27.4673	21.5469	28.6736	27.2438	14.9031	-13.7706	-12.3407	0.00715557	0.0192787	2.69422
IR, 4Gy	EV	22.0259	21.9905	21.9865	27.9669	27.9026	28.0957	26.4953	26.8439	26.4155	22.001	27.9884	26.5849	15.3571	-12.6312	-11.2278	0.0157622	0.0416973	2.64539
	WT	21.4925	21.4487	21.4739	28.1325	28.4902	28.2399	27.3152	26.8194	27.2144	21.4717	28.2875	27.1163	14.8279	-13.4596	-12.2885	0.00887653	0.0199897	2.25197
	7Q	21.1624	20.8328	20.9278	29.117	28.6424	28.7497	26.2322	26.345	26.2897	20.9743	28.8364	26.289	14.3304	-14.5059	-11.9585	0.00429812	0.0251262	5.84587
	7R	21.629	21.573	21.5478	29.624	29.2076	29.1199	26.8714	26.8648	26.7931	21.5833	29.3172	26.8431	14.9394	-14.3778	-11.9037	0.00469742	0.0261	5.55624
		Chr5_TCOF1_peak2
		Ct									Average Ct			Ct INPUT adjusted	Δ Ct		% Input		Ratio
															Ct[INPUT adjusted]-Ct[IP]		(2^∆Ct)x100%
		INPUT 1%			IP igG			IP Flag			INPUT 1%	IP igG	IP Flag	Ct INPUT1%- log2(100)	IP igG	IP Flag	IP igG	IP Flag	Flag/igG
		Ct 1	Ct 2	Ct 3	Ct 1	Ct 2	Ct 3	Ct 1	Ct 2	Ct 3
UNTREATED	EV	21.4683	21.2665	21.5306	28.4418	28.0368	28.5821	27.2098	27.4455	26.7053	21.4218	28.3536	27.1202	14.7779	-13.5756	-12.3423	0.00819081	0.0192579	2.35116
	WT	21.0305	21.023	21.0791	30.0502	30.1782	29.5414	26.5801	26.6976	26.5851	21.0442	29.9233	26.6209	14.4003	-15.5229	-12.2206	0.00212387	0.0209523	9.86512
	7Q	20.7169	20.9688	20.7687	28.0521	28.0595	27.9547	26.551	26.763	26.4862	20.8181	28.0221	26.6001	14.1743	-13.8478	-12.4258	0.00678245	0.0181744	2.67962
	7R	21.2299	21.148	21.1705	27.9739	28.0248	27.9463	26.6986	26.9269	26.7241	21.1828	27.9817	26.7832	14.539	-13.4427	-12.2442	0.00898134	0.0206121	2.29499
IR, 4Gy	EV	21.5924	21.6562	21.6358	27.3407	27.2022	27.1897	25.9109	25.991	26.2071	21.6281	27.2442	26.0363	14.9843	-12.2599	-11.0521	0.0203886	0.0470974	2.30998
	WT	20.8465	20.8776	20.9839	27.8071	28.0944	27.4362	26.574	26.4414	26.4136	20.9027	27.7792	26.4763	14.2588	-13.5204	-12.2175	0.00851038	0.0209976	2.4673
	7Q	20.7002	20.5801	20.5553	28.2921	28.3935	28.9125	25.9478	25.7174	25.8231	20.6119	28.5327	25.8294	13.968	-14.5646	-11.8614	0.00412673	0.0268758	6.51261
	7R	20.9464	20.9505	20.8743	28.8911	28.8722	28.6677	26.7945	26.4217	26.3391	20.9237	28.8103	26.5184	14.2799	-14.5304	-12.2385	0.00422575	0.0206933	4.89696
		Chr11_WEE1_mid
		Ct									Average Ct			Ct INPUT adjusted	Δ Ct		% Input		Ratio
															Ct[INPUT adjusted]-Ct[IP]		(2^∆Ct)x100%
		INPUT 1%			IP igG			IP Flag			INPUT 1%	IP igG	IP Flag	Ct INPUT1%- log2(100)	IP igG	IP Flag	IP igG	IP Flag	Flag/igG
		Ct 1	Ct 2	Ct 3	Ct 1	Ct 2	Ct 3	Ct 1	Ct 2	Ct 3
UNTREATED	EV	22.7554	22.7891	22.9138	29.5705	29.5524	29.0006	27.7155	27.4781	27.5812	22.8194	29.3745	27.5916	16.1755	-13.1989	-11.4161	0.0106346	0.0365953	3.44115
	WT	22.1944	22.3504	22.3415	30.4332	30.9391	30.582	27.3384	27.2835	27.7026	22.2955	30.6514	27.4415	15.6516	-14.9998	-11.7899	0.00305212	0.028241	9.25291
	7Q	21.983	21.8868	22.0024	29.1384	29.1425	28.7203	27.4552	27.8716	27.7759	21.9574	29.0004	27.7009	15.3135	-13.6869	-12.3874	0.00758303	0.0186651	2.46144
	7R	22.3645	22.6195	22.6762	29.1215	28.819	29.3339	27.9793	27.4827	27.4937	22.5534	29.0915	27.6519	15.9096	-13.1819	-11.7424	0.010761	0.0291877	2.71236
IR, 4Gy	EV	22.7169	22.7561	22.764	28.3406	28.4314	28.2615	26.8478	27.6375	26.7246	22.7457	28.3445	27.07	16.1018	-12.2427	-10.9681	0.020634	0.0499188	2.41925
	WT	22	22.0335	22.32	28.447	28.995	28.9066	27.3399	27.4509	27.4068	22.1178	28.7829	27.3992	15.474	-13.3089	-11.9252	0.00985443	0.0257135	2.60933
	7Q	21.7029	21.7535	21.7679	29.4206	29.5804	29.4736	26.7512	26.7215	26.7636	21.7414	29.4915	26.7454	15.0976	-14.394	-11.6479	0.00464499	0.0311635	6.70905
	7R	22.3197	21.9964	22.0559	29.8808	29.5928	29.9282	27.0446	27.3061	27.1504	22.124	29.8006	27.1671	15.4802	-14.3205	-11.6869	0.00488781	0.0303312	6.20547

## Sheet: PRIMER EFFICIENCY
PRIMER EFFICIENCY
Beta-Actin_in3
Sample	Ct 1	Ct 2	Ct 3	Avg Ct	Qty	Log (Qty)
1	21.5685	21.9287	21.4206	21.6393	1	0
1/5	23.4635	23.4641	23.8591	23.5956	0.2	-0.69897
1/25	26.0734	26.0193	26.4609	26.1845	0.04	-1.39794
1/625	31.419	30.9786	31.097	31.1649	0.0016	-2.79588
					Slope	-3.45024
					R Squared	0.997711
				EFF	Efficiency (%)	94.9102
Chr5_TCOF1_peak2
Sample	Ct 1	Ct 2	Ct 3	Avg Ct	Qty	Log (Qty)
1	19.2003	19.4733	19.5913	19.4216	1	0
1/5	22.7289	22.7305	22.7192	22.7262	0.2	-0.69897
1/25	24.9772	24.8996	24.7493	24.8754	0.04	-1.39794
1/625	29.5936	29.3656	29.2042	29.3878	0.0016	-2.79588
					Slope	-3.48413
					R Squared	0.991538
				EFF	Efficiency (%)	93.6491
Chr11_WEE1_mid
Sample	Ct 1	Ct 2	Ct 3	Avg Ct	Qty	Log (Qty)
1	21.5722	21.9018	21.7916	21.7552	1	0
1/5	24.303	24.4184	23.8847	24.202	0.2	-0.69897
1/25	26.7641	26.7553	27.5297	27.0163	0.04	-1.39794
1/625	31.6526	31.2008	31.6352	31.4962	0.0016	-2.79588
					Slope	-3.49859
				EFF	R Squared	0.997876
					Efficiency (%)	93.1211
